# Supplementary material for: Host Cell Responses to Persistent Mycoplasmas - Different Stages in Infection of HeLa Cells with Mycoplasma hominis
Source: PLoS One. 2013 Jan 11;8(1):e54219. doi: 10.1371/journal.pone.0054219 (PMC3543322; doi:10.1371/journal.pone.0054219)
Supplement: Table S1 — Microarray data set. Up- and downregulated HeLa cell genes [>1 fold] at 4 h, 48 h or 2 weeks after M. hominis infection. (XLSX) [file pone.0054219.s002.xlsx]

## Sheet: Tabelle1
ProbeName	t4_3331_significant.Corrected p-value	t4_3331_significant.regulation	t4_3331_significant.FC	t4_3331_significant.GeneSymbol	t48_4365_significant.Corrected p-value	t48_4365_significant.regulation	t48_4365_significant.FC	t48_4365_significant.GeneSymbol	perm_5909_significant.Corrected p-value	perm_5909_significant.regulation	perm_5909_significant.FC	perm_5909_significant.GeneSymbol	count na	accessions	Sequence	GeneName	SystematicName	Description
A_19_P00315493	0.0438	down	-3.99	na	na	na	na	na	na	na	na	na	9		ATATATTCTTCAGTGTGATTTAGGTGAGTCAGGAATTTTTCCTCTGGAGACTGCCTAAAT	lincRNA:chr14:71954577-71956430_F	lincRNA:chr14:71954577-71956430_F	lincRNA:chr14:71954577-71956430 forward strand
A_19_P00315502	0.008	up	2.72	na	na	na	na	na	0.000601	down	-4.51	na	6		AGCCGGGATCGGGTTGTTGTTAATTTCTTAAGCAATTTCTAAATTCTGTATTGACTCTCT	lincRNA:chr10:6780318-6780905_F	lincRNA:chr10:6780318-6780905_F	lincRNA:chr10:6780318-6780905 forward strand
A_19_P00315504	na	na	na	na	0.0381078	up	1.91	na	na	na	na	na	9		TCTCTGTGTTGTGTTCTGCTGCCTAAATCCACCAGATAAATATTTGGTTTACTTTGCTTG	lincRNA:chr5:127395508-127395983_R	lincRNA:chr5:127395508-127395983_R	lincRNA:chr5:127395508-127395983 reverse strand
A_19_P00315506	na	na	na	na	0.0379108	down	-2.51	na	na	na	na	na	9		CAATGGATTCCATGTTTCTTTTTCTTGGGGGGAGCAGGGAGGGAGAAAGGTAGAAAAATG	lincRNA:chr1:175126122-175161929_R	lincRNA:chr1:175126122-175161929_R	lincRNA:chr1:175126122-175161929 reverse strand
A_19_P00315561	na	na	na	na	na	na	na	na	0.0205	up	1.77	na	9		ACAGAAACATGTCTGGAAAGTGTGCACCATTCTATGGACAACAGACCTTTTGGGTCAGGA	lincRNA:chrX:102160699-102162390_F	lincRNA:chrX:102160699-102162390_F	lincRNA:chrX:102160699-102162390 forward strand
A_19_P00315577	na	na	na	na	na	na	na	na	0.0169	down	-5.02	na	9		ACACCCTTTGCAAACACGTCCTCTTTTGGCCTTGGGAGGCAGCATGGGAGTGTCTGCTGA	lincRNA:chr21:44922353-44923757_R	lincRNA:chr21:44922353-44923757_R	lincRNA:chr21:44922353-44923757 reverse strand
A_19_P00315584	na	na	na	na	na	na	na	na	0.0448	up	2.87	na	9		TGTCAAGGGAATGAACCTGACGAGAAAAGACCAAACATAGGACTGTTACAGGGAAGAAAA	lincRNA:chr2:178148245-178151484_R	lincRNA:chr2:178148245-178151484_R	lincRNA:chr2:178148245-178151484 reverse strand
A_19_P00315651	na	na	na	na	na	na	na	na	0.0224	up	1.5	na	9		GCTTGGACACCGTGGAGACAGGGCCCTCCTTGTGCTTCAGAAGCATCAACGTGTCAGAAA	lincRNA:chr20:61405678-61408273_R	lincRNA:chr20:61405678-61408273_R	lincRNA:chr20:61405678-61408273 reverse strand
A_19_P00315717	0.000314	down	-1.45	na	na	na	na	na	0.00163	up	1.77	na	6		CATCATCAAGCAGACATACTCAAGGTACCAACACAGCAAAGGCACAAAATGTCTCTATAT	lincRNA:chr4:15685948-15688226_F	lincRNA:chr4:15685948-15688226_F	lincRNA:chr4:15685948-15688226 forward strand
A_19_P00315718	na	na	na	na	na	na	na	na	0.00496	up	1.89	na	9		CCCACCACTTCAAGATGTTCTTATACAAGTCAACAGTCTAGCAGATCAGCCAGTCTCTTT	lincRNA:chr4:15685948-15688226_F	lincRNA:chr4:15685948-15688226_F	lincRNA:chr4:15685948-15688226 forward strand
A_19_P00315738	0.00869	up	2.79	na	0.0087739	up	3.21	na	na	na	na	na	6		ATCCCTGTTGCTCAAACCCACTAATTAGCTCATTCTTATCTACAAGTAGCAGGGGCCCTA	lincRNA:chr8:90733171-90734578_R	lincRNA:chr8:90733171-90734578_R	lincRNA:chr8:90733171-90734578 reverse strand
A_19_P00315753	0.00726	up	1.31	na	na	na	na	na	na	na	na	na	9		GGACATTCCTGTATGTTGTATGAGGCCCTGTCTTAACAGAAATAGTGATGTCATCATCAT	lincRNA:chr3:106965972-106966557_F	lincRNA:chr3:106965972-106966557_F	lincRNA:chr3:106965972-106966557 forward strand
A_19_P00315755	0.0335	up	1.75	na	na	na	na	na	na	na	na	na	9		CTGAGTATTTGTAGATGCTTAATGACTGAAATGAATTTGGAGGCACTGATGAAAGTGATT	lincRNA:chr2:61157504-61158747_F	lincRNA:chr2:61157504-61158747_F	lincRNA:chr2:61157504-61158747 forward strand
A_19_P00315780	na	na	na	na	0.0109082	up	3.26	na	na	na	na	na	9		CATCATCAAATCCCTGTTGCTCAAACCCACTAATTAGCTCATTCTTATCTACAAGTAGCA	lincRNA:chr8:90733132-90733552_R	lincRNA:chr8:90733132-90733552_R	lincRNA:chr8:90733132-90733552 reverse strand
A_19_P00315793	na	na	na	na	0.015496	down	-1.43	na	0.00849	up	1.99	na	6		ACAGGCAGAAGAGGCCGATGAGTGACATGACATCACCACTTAGTGACTGCCCTCGTCCTG	lincRNA:chr9:138999950-139001270_R	lincRNA:chr9:138999950-139001270_R	lincRNA:chr9:138999950-139001270 reverse strand
A_19_P00315804	na	na	na	na	0.00629646	up	5.08	na	na	na	na	na	9		TACAGGAGACAATCAGTCTTACACTCTTCCATGGTCACAAACAAGAGGTCCCTGGATCTA	lincRNA:chr9:2530903-2539456_R	lincRNA:chr9:2530903-2539456_R	lincRNA:chr9:2530903-2539456 reverse strand
A_19_P00315870	0.00472	up	2.19	na	na	na	na	na	na	na	na	na	9		GGAGCCAATGCAGGAGTCCTGCTGCTGGCATGTGGGGATGATGGTCTGAAGGTCATCACA	lincRNA:chr2:224569607-224588760_R	lincRNA:chr2:224569607-224588760_R	lincRNA:chr2:224569607-224588760 reverse strand
A_19_P00316010	0.00825	down	-1.98	na	na	na	na	na	na	na	na	na	9		TTTTCCGTCAAAGTGCTTGCTATGGCTTTCATAGCTGGGACAAGTAACATTAAGTATTCA	lincRNA:chr17:67547498-67549996_F	lincRNA:chr17:67547498-67549996_F	lincRNA:chr17:67547498-67549996 forward strand
A_19_P00316041	0.0235	up	2.17	na	na	na	na	na	na	na	na	na	9		CAGTGAGTGCTGAGGCTGCACAGAGGAGGAAGGCAGCACAATGATGGAAGGCTTCCTAAA	lincRNA:chr8:128200315-128209872_R	lincRNA:chr8:128200315-128209872_R	lincRNA:chr8:128200315-128209872 reverse strand
A_19_P00316063	na	na	na	na	0.0216928	up	2.36	na	0.00698	up	2.47	na	6		CAGACTTGCCAAAATGCTCAGCGCAGGCCTCGTCGGCAACTGCAGACAAGCAGAGGCAGC	lincRNA:chr9:132251424-132266135_F	lincRNA:chr9:132251424-132266135_F	lincRNA:chr9:132251424-132266135 forward strand
A_19_P00316075	na	na	na	na	na	na	na	na	0.00116	down	-3.38	na	9		GGCTCACCAAACAAAACAGCTGTGTTTCTAGTGTGGTTTCAGACTTAGAGAAGCAGAGAT	lincRNA:chr4:53578686-53579392_F	lincRNA:chr4:53578686-53579392_F	lincRNA:chr4:53578686-53579392 forward strand
A_19_P00316088	na	na	na	na	na	na	na	na	0.0276	down	-3.41	na	9		GGAGAAGGGTGCTAGTATCACATCACGCATCTATAAAATGTGGGCCGCTTTTGGAAATAC	lincRNA:chr4:16260982-16262107_F	lincRNA:chr4:16260982-16262107_F	lincRNA:chr4:16260982-16262107 forward strand
A_19_P00316110	0.0126	up	1.82	na	na	na	na	na	0.00199	up	2.55	na	6		AACCTTTGAGGTGTGAGGGCCTTGATCTGGGGTGCAGCCTCCAGCTTTCTGCTTACAGAG	lincRNA:chr21:44890312-44891472_R	lincRNA:chr21:44890312-44891472_R	lincRNA:chr21:44890312-44891472 reverse strand
A_19_P00316198	na	na	na	na	0.0397177	down	-3.9	na	na	na	na	na	9		AAGCTTATTGACATAATACATCTATATCACATCCTCCAATCCATTTTTTTAAGTAATAAA	lincRNA:chr8:128301946-128433208_R	lincRNA:chr8:128301946-128433208_R	lincRNA:chr8:128301946-128433208 reverse strand
A_19_P00316199	na	na	na	na	0.0444336	down	-3.29	na	na	na	na	na	9		CCCTTAACCCAGATTTTGCATATTATGCATTGCTCATTTGTCACCTACAAAAATAAAGGT	lincRNA:chr2:37067684-37068375_R	lincRNA:chr2:37067684-37068375_R	lincRNA:chr2:37067684-37068375 reverse strand
A_19_P00316200	na	na	na	na	0.016483	down	-2.86	na	na	na	na	na	9		GTCCAATTGATAGTATAGCTTGCCTCTGCTAATAAATACACAAAAGTTTTCTTTCCTGTG	lincRNA:chr2:37067684-37068375_R	lincRNA:chr2:37067684-37068375_R	lincRNA:chr2:37067684-37068375 reverse strand
A_19_P00316219	na	na	na	na	na	na	na	na	0.0451	up	2.42	na	9		GATTCTAGGGTCAGGGCCCTCACTCACACTGCTGGAAGGTTAAAGTCGACTTCACGCTAG	lincRNA:chr4:6672489-6675591_R	lincRNA:chr4:6672489-6675591_R	lincRNA:chr4:6672489-6675591 reverse strand
A_19_P00316275	na	na	na	na	na	na	na	na	0.0251	down	-2.79	na	9		CCCGCCACACCTCCTCCAGGGGCCGCAGTGTCACCTCCAGGTAGGCATCCTTCAGTGTGG	lincRNA:chr16:11481046-11484311_F	lincRNA:chr16:11481046-11484311_F	lincRNA:chr16:11481046-11484311 forward strand
A_19_P00316288	0.00506	down	-1.83	na	0.0012291	down	-1.81	na	na	na	na	na	6		AAGAAATGCTTAACTGAGAAATGCTCATGTTGGGATATCATCGATGAGACTTTAATTTGG	lincRNA:chr15:25360740-25364409_F	lincRNA:chr15:25360740-25364409_F	lincRNA:chr15:25360740-25364409 forward strand
A_19_P00316324	0.0376	down	-2.2	na	na	na	na	na	0.0122	up	3.33	na	6		TTGATCTCATTCTTTCACCATCAAAGGGGAATGCAGTAGTGCCAGCAGGAGCAGAAAAAA	lincRNA:chr1:234861147-234867390_F	lincRNA:chr1:234861147-234867390_F	lincRNA:chr1:234861147-234867390 forward strand
A_19_P00316325	na	na	na	na	na	na	na	na	0.0456	up	1.69	na	9		GATCTTGTGGCCAAGAGTTCAGACCGTGGCGAAGTGGAGAGTGACATGCAGTTGGATGGC	lincRNA:chrX:62648543-62780810_R	lincRNA:chrX:62648543-62780810_R	lincRNA:chrX:62648543-62780810 reverse strand
A_19_P00316326	0.0272	down	-1.23	na	na	na	na	na	na	na	na	na	9		TGGACTTCATTTAAAGAAACCCACGGACCATTAATGGACAAAAACATGAGTCAATATGTA	lincRNA:chr3:185000782-185003398_F	lincRNA:chr3:185000782-185003398_F	lincRNA:chr3:185000782-185003398 forward strand
A_19_P00316328	na	na	na	na	0.020583	down	-1.29	na	na	na	na	na	9		AGAGGCCGGTGGGCACGTCACAGGAGACAGACACCCCGTCCTCGCTGGCCAGCTCAATCC	lincRNA:chr16:11477555-11478836_F	lincRNA:chr16:11477555-11478836_F	lincRNA:chr16:11477555-11478836 forward strand
A_19_P00316333	na	na	na	na	0.00405212	up	4.12	na	0.00587	up	4.86	na	6		TGAGCCTCATCTAAGTAATTTCTACTCTGCCTTTGACCACTAAACTCATGTTGGACAAGA	lincRNA:chr22:45530170-45530620_R	lincRNA:chr22:45530170-45530620_R	lincRNA:chr22:45530170-45530620 reverse strand
A_19_P00316340	0.041	up	5.41	na	na	na	na	na	na	na	na	na	9		TTGCCTTCACGGAACCTGGATAAACTACAGTTCCCGAATTAAACTTGTTTCTGATGAACT	lincRNA:chr7:130600800-130606702_F	lincRNA:chr7:130600800-130606702_F	lincRNA:chr7:130600800-130606702 forward strand
A_19_P00316341	0.000248	up	4.23	na	na	na	na	na	na	na	na	na	9		CTTTAGGCGTAAAGGCGGTCTCTCTCTAGGCTGATCAAACAGCCCTTTGCCCAGTGCTAA	lincRNA:chr7:130600800-130606702_F	lincRNA:chr7:130600800-130606702_F	lincRNA:chr7:130600800-130606702 forward strand
A_19_P00316344	na	na	na	na	na	na	na	na	0.00952	up	1.62	na	9		TTTCAAATTGTGCTGTGATAACCCTGGCTGTCTTCCTGCTCCCATAGTGGATAAAAGCGT	lincRNA:chr9:138999614-139000884_R	lincRNA:chr9:138999614-139000884_R	lincRNA:chr9:138999614-139000884 reverse strand
A_19_P00316401	na	na	na	na	na	na	na	na	0.0319	down	-1.52	na	9		GCGACAAAGCATTCCTGCTGCTGTTGCTGCCACCTACCTTCCCTGCTTTGGGAGGATACA	lincRNA:chr8:37188291-37189450_R	lincRNA:chr8:37188291-37189450_R	lincRNA:chr8:37188291-37189450 reverse strand
A_19_P00316404	0.00711	up	1.81	na	0.00332211	up	1.96	na	0.0204	down	-1.44	na	3		GGAACAGGGCTTCTCTAGATTATTTCAGGGAACGAGCTATTATTTGAATGTTAATTTAAG	lincRNA:chr17:21435180-21454915_R	lincRNA:chr17:21435180-21454915_R	lincRNA:chr17:21435180-21454915 reverse strand
A_19_P00316405	0.00155	up	1.85	na	0.00193852	up	1.96	na	0.00162	down	-1.54	na	3		CAGGAGAACTGCTCCATGTTGGCTCAGCAGAATGTTATTATAGGTAGCTCAAAAAGAGAG	lincRNA:chr17:21435180-21454915_R	lincRNA:chr17:21435180-21454915_R	lincRNA:chr17:21435180-21454915 reverse strand
A_19_P00316419	0.0158	up	1.74	na	0.00584025	up	3.06	na	na	na	na	na	6		CTAGTGCCACGAGGTTTACTTGACTGTTGTGTGAAAAGCTGATAAGAAAACCATCCAGAA	lincRNA:chr6:86386847-86387869_R	lincRNA:chr6:86386847-86387869_R	lincRNA:chr6:86386847-86387869 reverse strand
A_19_P00316432	0.0178	up	1.38	na	0.0175716	down	-1.38	na	na	na	na	na	6		ATATCTCTATCCTTTTGTTTCCATTACTCACTTTCTGTGGCTGCTGCTGCAGAAGCCACT	lincRNA:chr6:30271847-30274737_R	lincRNA:chr6:30271847-30274737_R	lincRNA:chr6:30271847-30274737 reverse strand
A_19_P00316471	0.0287	up	2	na	na	na	na	na	na	na	na	na	9		ACAAGCACCGCAGCTCAGCCTCTTCTTGAAGACACGTCACCTGGGGCCACTGGGCACACA	lincRNA:chr20:37054632-37055125_F	lincRNA:chr20:37054632-37055125_F	lincRNA:chr20:37054632-37055125 forward strand
A_19_P00316475	na	na	na	na	na	na	na	na	0.00622	down	-2.63	na	9		CCTTTGTTCCTCCTCTCCTGTTCTTCCTAAGACATCATCACTGAAATTTAAGCTTATAAA	lincRNA:chr10:47135046-47136463_R	lincRNA:chr10:47135046-47136463_R	lincRNA:chr10:47135046-47136463 reverse strand
A_19_P00316541	0.0169	up	1.72	na	0.00374316	up	2.92	na	0.0407	down	-1.53	na	3		TCCAGAACATCTGGGAGAATATTTAATGGAAAATCGCTTGGTTAAAACCTGACACTTTTA	lincRNA:chr6:86387541-86387908_R	lincRNA:chr6:86387541-86387908_R	lincRNA:chr6:86387541-86387908 reverse strand
A_19_P00316599	0.012	down	-1.53	na	na	na	na	na	na	na	na	na	9		GCTTGTTCAAAATCTGAAAGGCACACCCAGAAGCTTTCTCTAAACATTTTGGCTCCCATT	lincRNA:chrX:73425071-73428011_R	lincRNA:chrX:73425071-73428011_R	lincRNA:chrX:73425071-73428011 reverse strand
A_19_P00316623	na	na	na	na	0.038234	up	1.51	na	na	na	na	na	9		AAGATGCCTATGGAAACACATGCTGCTGGTCACCGGTCACTGTGCACTACAAAAGTCTGC	lincRNA:chr2:75158491-75160151_R	lincRNA:chr2:75158491-75160151_R	lincRNA:chr2:75158491-75160151 reverse strand
A_19_P00316629	na	na	na	na	na	na	na	na	0.0479	down	-1.39	na	9		TCGCTGGTCTACCTGCTCTTCCTGCTGCTGCTGCCCTGGTTCCCCGGCCCCACCCGATGC	lincRNA:chr16:88815801-88851618_R	lincRNA:chr16:88815801-88851618_R	lincRNA:chr16:88815801-88851618 reverse strand
A_19_P00316641	0.0075	up	174.66	na	0.0110673	up	5.7	na	0.00761	down	-22.62	na	3		TGAAGAAAGGGTTTCCTGGGCAAAATACTGAGACCAGGTCTTCACCAGCAAACAAGCATT	lincRNA:chr2:121300485-121301954_F	lincRNA:chr2:121300485-121301954_F	lincRNA:chr2:121300485-121301954 forward strand
A_19_P00316650	na	na	na	na	na	na	na	na	0.0193	up	2.33	na	9		GTGTCAGGAGCTGGCCTCCTGCCTTCTGGGTTGAGAGATATCGAATGCTGCTTTGCCAAG	lincRNA:chr15:58506416-58571520_R	lincRNA:chr15:58506416-58571520_R	lincRNA:chr15:58506416-58571520 reverse strand
A_19_P00316659	0.00494	up	1.74	na	0.00424623	up	3.21	na	0.0376	down	-1.56	na	3		CACGAGGTTTACTTGACTGTTGTGTGAAAAGCTGATAAGAAAACCATCCAGAAAAAAGCT	lincRNA:chr6:86386840-86387907_R	lincRNA:chr6:86386840-86387907_R	lincRNA:chr6:86386840-86387907 reverse strand
A_19_P00316663	na	na	na	na	na	na	na	na	0.0255	up	1.23	na	9		ATTAGGGTGAAATTTTGTTCTTCTATCTTCCCCCCTTGCATGGAGAGGACCCTCATTCCT	lincRNA:chr9:132255788-132266207_R	lincRNA:chr9:132255788-132266207_R	lincRNA:chr9:132255788-132266207 reverse strand
A_19_P00316697	0.0475	up	1.45	na	na	na	na	na	na	na	na	na	9		GAGCTGTAAGCCGTTCTCTCTTCTCTCTCTCTCTCTTCAGCTATCTGCTCCTGGACAAAT	lincRNA:chr6:22056867-22194604_R	lincRNA:chr6:22056867-22194604_R	lincRNA:chr6:22056867-22194604 reverse strand
A_19_P00316701	0.0141	up	1.72	na	0.00265374	up	3.08	na	na	na	na	na	6		GGCTAGTGCCACGAGGTTTACTTGACTGTTGTGTGAAAAGCTGATAAGAAAACCATCCAG	lincRNA:chr6:86386796-86387718_R	lincRNA:chr6:86386796-86387718_R	lincRNA:chr6:86386796-86387718 reverse strand
A_19_P00316745	0.0167	up	1.21	na	0.0232026	up	2.34	na	0.000932	up	2.41	na	3		TTGCGGTGATAGGGCCAAGGGCCTGGGCCTTCAATTCTCCAGACTTGCCAAAATGCTCAG	lincRNA:chr9:132255819-132266046_F	lincRNA:chr9:132255819-132266046_F	lincRNA:chr9:132255819-132266046 forward strand
A_19_P00316758	0.00847	down	-1.23	na	0.0200488	down	-1.18	na	0.0246	up	1.25	na	3		GAACCCTCTCACAAAAGTACAAGCTTAAAGGGGCTAAAATCCATTAATACATTCCATTTT	lincRNA:chr3:185000753-185009695_F	lincRNA:chr3:185000753-185009695_F	lincRNA:chr3:185000753-185009695 forward strand
A_19_P00316828	na	na	na	na	na	na	na	na	0.0117	down	-1.81	na	9		TCCCAAGACCATTTGGACAAGGTCATCTCTATCCCACCATGGCCTCCTCCCAGAGGAGGA	lincRNA:chr17:46760728-46781844_F	lincRNA:chr17:46760728-46781844_F	lincRNA:chr17:46760728-46781844 forward strand
A_19_P00316844	na	na	na	na	0.0210267	up	1.2	na	na	na	na	na	9		TCATCCATCATAGGGATGTTGGTATCTACTGTGGGTTGGGTAGGGCCGATGTGCTGAGGA	lincRNA:chr6:30255819-30257149_R	lincRNA:chr6:30255819-30257149_R	lincRNA:chr6:30255819-30257149 reverse strand
A_19_P00316895	na	na	na	na	0.00734839	up	1.36	na	na	na	na	na	9		CCCATGGGCTTCCAACTGCGATGGTTGTGCTCTCCTTTGACCCTGTATCCTGGGGGACTG	lincRNA:chr9:132251514-132265917_R	lincRNA:chr9:132251514-132265917_R	lincRNA:chr9:132251514-132265917 reverse strand
A_19_P00316914	na	na	na	na	na	na	na	na	0.0164	up	3.95	na	9		AGTACCATTTGCAAATGGCTCTTGCTTCACGGTTGCATCTCCATCTGGGTAAACAACCTA	lincRNA:chr1:234796016-234802850_F	lincRNA:chr1:234796016-234802850_F	lincRNA:chr1:234796016-234802850 forward strand
A_19_P00316919	0.00348	up	1.71	na	0.00156774	up	2.13	na	na	na	na	na	6		TTCAGCTGTGAAATTCCCTGGGGTGCTGCAGTAGAGGAAGGTTTGGGGTCTTGACGGGTG	lincRNA:chr17:75084863-75090626_F	lincRNA:chr17:75084863-75090626_F	lincRNA:chr17:75084863-75090626 forward strand
A_19_P00316946	0.0474	up	1.76	na	na	na	na	na	0.0456	down	-1.73	na	6		TTGTACTGCTGCTGGCGAGAGAGATCTGGTCGACCTTAGACATGGCAAGGCGAGAGGTGA	lincRNA:chr19:28269547-28283939_R	lincRNA:chr19:28269547-28283939_R	lincRNA:chr19:28269547-28283939 reverse strand
A_19_P00316992	na	na	na	na	na	na	na	na	0.0194	down	-1.71	na	9		AATTAAGATCTTCTCTCTCTTTCTCCATTTGTCACAACCAGGCTGGATTGTTCCAAAAAA	lincRNA:chr19:28266664-28268543_R	lincRNA:chr19:28266664-28268543_R	lincRNA:chr19:28266664-28268543 reverse strand
A_19_P00317023	0.0317	up	1.44	na	na	na	na	na	na	na	na	na	9		TGTCTAGAAATCAGCCTGGCTGGGACGCACACCAATAGGAGGGCATCCTCACCTTTCCCA	lincRNA:chr8:129000922-129004320_F	lincRNA:chr8:129000922-129004320_F	lincRNA:chr8:129000922-129004320 forward strand
A_19_P00317094	na	na	na	na	na	na	na	na	0.0173	up	1.91	na	9		TGAACAGAAAAAGAGGATACCTCTGCGATCCCGGGTCATCTCCAGATGCTAGGGTTATGG	lincRNA:chrX:115034966-115085422_R	lincRNA:chrX:115034966-115085422_R	lincRNA:chrX:115034966-115085422 reverse strand
A_19_P00317128	na	na	na	na	0.0137686	up	2.39	na	0.00233	up	1.93	na	6		ATGCAAGGGGGGAAGATAGAAGAACAAAATTTCACCCTAATGTAGTGTCTTTAGACCGTG	lincRNA:chr9:132255761-132266207_F	lincRNA:chr9:132255761-132266207_F	lincRNA:chr9:132255761-132266207 forward strand
A_19_P00317178	0.000852	up	1.71	na	0.000529927	up	2.89	na	0.00275	down	-1.87	na	3		CACGAAAAAACTTCCAGAACATCTGGGAGAATATTTAATGGAAAATCGCTTGGTTAAAAC	lincRNA:chr6:86387687-86387908_R	lincRNA:chr6:86387687-86387908_R	lincRNA:chr6:86387687-86387908 reverse strand
A_19_P00317242	na	na	na	na	na	na	na	na	0.011	down	-4.58	na	9		AGCACGTGGTGACCTTCGACGGCCGGGTATGGGACCTCAGCACCCAGTGCGGCAGCATCC	lincRNA:chr16:11478884-11481155_R	lincRNA:chr16:11478884-11481155_R	lincRNA:chr16:11478884-11481155 reverse strand
A_19_P00317276	0.0352	down	-1.52	na	0.00858787	down	-2.21	na	0.00669	up	2.19	na	3		CATCCCGACGAGCCGCCATGGACCCAGGGCTGAGCTGTGACCATGAGGGCTATCCCGACG	lincRNA:chr16:88737682-88738524_F	lincRNA:chr16:88737682-88738524_F	lincRNA:chr16:88737682-88738524 forward strand
A_19_P00317389	na	na	na	na	na	na	na	na	0.0452	up	1.27	na	9		TTCTTGGTATCGATTTGCTTCTTGGTCCCATGGCTTCTGCAGCCCACGTCGGGAGGGCAA	lincRNA:chr10:6213734-6214786_F	lincRNA:chr10:6213734-6214786_F	lincRNA:chr10:6213734-6214786 forward strand
A_19_P00317412	0.00715	up	1.75	na	na	na	na	na	0.00191	up	2.66	na	6		AAGGATGCCCTAAGCCAAAGGAAGTCCTTCCTGGGGTCTAATCTCTACCTTTTGCATGAT	lincRNA:chr1:37920481-37921461_R	lincRNA:chr1:37920481-37921461_R	lincRNA:chr1:37920481-37921461 reverse strand
A_19_P00317473	0.000614	up	1.8	na	0.000394338	up	3.04	na	0.00363	down	-1.75	na	3		ACGAAAAAACTTCCAGAACATCTGGGAGAATATTTAATGGAAAATCGCTTGGTTAAAACC	lincRNA:chr6:86386863-86387906_R	lincRNA:chr6:86386863-86387906_R	lincRNA:chr6:86386863-86387906 reverse strand
A_19_P00317523	na	na	na	na	na	na	na	na	0.0412	down	-2.34	na	9		ATATTGTGTCCTTGGTCTTATCTGTGATGATCTTATCCCGAACCTGAACTTCTGTTGAAA	lincRNA:chr6:86387044-86387458_R	lincRNA:chr6:86387044-86387458_R	lincRNA:chr6:86387044-86387458 reverse strand
A_19_P00317524	na	na	na	na	na	na	na	na	0.0185	down	-2.59	na	9		GTTCCAAAGTTGCAACGATTTCTGTAAGTGGAGTTTTTCTGTTTGCTTAGAGATCAGTGA	lincRNA:chr6:86387044-86387458_R	lincRNA:chr6:86387044-86387458_R	lincRNA:chr6:86387044-86387458 reverse strand
A_19_P00317547	na	na	na	na	0.0470163	down	-9.63	na	na	na	na	na	9		GCTTAGGTTAACAGGACCCTGGAAGTAAAGTTGTTGATTTATTCAATAGAGTATTCTCAA	lincRNA:chr6:138144808-138145212_R	lincRNA:chr6:138144808-138145212_R	lincRNA:chr6:138144808-138145212 reverse strand
A_19_P00317550	na	na	na	na	na	na	na	na	0.0127	up	1.9	na	9		AGATGTTCGGGTCCAATTCACCAGAATGCCAAGTTATACAGGGTTGTGGAATCAAAAACT	lincRNA:chr8:32853730-32902348_F	lincRNA:chr8:32853730-32902348_F	lincRNA:chr8:32853730-32902348 forward strand
A_19_P00317558	0.00947	up	1.99	na	0.0483331	up	1.46	na	na	na	na	na	6		TGTTCGAAGGCGGCGTTGTGTGCAATTCGGATTAATGAAGGGGAAGGGTTTTGTGTGGAA	lincRNA:chr6:86387201-86388404_R	lincRNA:chr6:86387201-86388404_R	lincRNA:chr6:86387201-86388404 reverse strand
A_19_P00317683	na	na	na	na	0.0162299	up	2.33	na	0.000565	up	2.36	na	6		CCTGGCACAGTGAAGCGAGGGTGGGGGCAGGAATGAGGGTCCTCTCCATGCAAGGGGGGA	lincRNA:chr9:132255790-132266370_F	lincRNA:chr9:132255790-132266370_F	lincRNA:chr9:132255790-132266370 forward strand
A_19_P00317732	na	na	na	na	na	na	na	na	0.0383	up	1.54	na	9		TACTGGGCATCACATGCTGCTTCCCTTTGTGGCTTTGAATAAACCCTTATTTTCTTGTCC	lincRNA:chr11:107182857-107185212_R	lincRNA:chr11:107182857-107185212_R	lincRNA:chr11:107182857-107185212 reverse strand
A_19_P00317743	0.0137	up	1.68	na	0.000213654	up	3.31	na	0.0307	down	-1.46	na	3		TGTGGACGAGTAGCCAGTGAAGATAATGAATGTCGAATGTGACTGACTAGCAGCTTCATT	lincRNA:chr6:86387517-86388451_R	lincRNA:chr6:86387517-86388451_R	lincRNA:chr6:86387517-86388451 reverse strand
A_19_P00317773	na	na	na	na	na	na	na	na	0.0289	up	3.22	na	9		CCTTCCATCTCCCTTAATCAGGACCTTGGTATAATTTATCAGGTATTTTTTAAGGTTCTA	lincRNA:chr15:25365494-25367588_F	lincRNA:chr15:25365494-25367588_F	lincRNA:chr15:25365494-25367588 forward strand
A_19_P00317789	na	na	na	na	0.00108631	up	1.38	na	na	na	na	na	9		AAACAACTTTGTTATAATACAGTCTCTGCCACAGATGCATGTGACCTCTTCAGGGGCCCA	lincRNA:chr4:6675180-6677772_F	lincRNA:chr4:6675180-6677772_F	lincRNA:chr4:6675180-6677772 forward strand
A_19_P00317793	0.000344	up	2.75	na	0.00740168	up	2.25	na	na	na	na	na	6		ACCTCTGTCCTGTGTGCCCAGTGGCCCCAGGTGACGTGTCTTCAAGAAGAGGCTGAGCTG	lincRNA:chr20:37055062-37063916_R	lincRNA:chr20:37055062-37063916_R	lincRNA:chr20:37055062-37063916 reverse strand
A_19_P00317815	na	na	na	na	na	na	na	na	0.016	up	3.75	na	9		TCCTTATCAGGGGTGGATGCTGTCAGACTTGCTAATGGTGGAATTTCTGGCATGTGGCAG	lincRNA:chr5:133842307-133844415_F	lincRNA:chr5:133842307-133844415_F	lincRNA:chr5:133842307-133844415 forward strand
A_19_P00317824	na	na	na	na	0.0270939	up	1.5	na	na	na	na	na	9		CATTAGTTTTAAACTTCCTAACCCTTGGGAGAAGGCAAAACACTTGATGAAATCTACATA	lincRNA:chrX:73164176-73167153_F	lincRNA:chrX:73164176-73167153_F	lincRNA:chrX:73164176-73167153 forward strand
A_19_P00317856	na	na	na	na	na	na	na	na	0.0379	up	3.05	na	9		GATGCCAAAATGGAACCAAATCTCCATGAACTCTGCTAATGGAAGACGAGGAAAAGGCAG	lincRNA:chr2:217384052-217394177_F	lincRNA:chr2:217384052-217394177_F	lincRNA:chr2:217384052-217394177 forward strand
A_19_P00317871	0.00276	up	2.66	na	na	na	na	na	na	na	na	na	9		TATTTTCTGAGCCTGATGGATTTACAGTGATCTTCAGTGGTCTGGGGAATAACGCTGGTG	lincRNA:chr8:128866972-128902987_F	lincRNA:chr8:128866972-128902987_F	lincRNA:chr8:128866972-128902987 forward strand
A_19_P00317872	0.00146	up	2.73	na	0.0256698	up	1.25	na	na	na	na	na	6		GATTAAAAAGATGCCCCTCAAGATGGCTGTGCCTGTCAGCTGCATGGAGCTTCGTTCAAG	lincRNA:chr8:128866972-128902987_F	lincRNA:chr8:128866972-128902987_F	lincRNA:chr8:128866972-128902987 forward strand
A_19_P00317897	na	na	na	na	na	na	na	na	0.0187	up	1.59	na	9		TTTGGATAATTTCCGTCCTTGGCGGTGTGTTCTATAGCATAGGTATGAAGTGGGTGCTCT	lincRNA:chr1:173386931-173387766_R	lincRNA:chr1:173386931-173387766_R	lincRNA:chr1:173386931-173387766 reverse strand
A_19_P00317913	na	na	na	na	0.0323344	down	-2.16	na	na	na	na	na	9		CTGGTGGGCCTTCGCGGCTCCGCTGGGTTGGCAGCCGCTTGAGCCACTGCGAGGAAAGCA	lincRNA:chr6:29706528-29716826_R	lincRNA:chr6:29706528-29716826_R	lincRNA:chr6:29706528-29716826 reverse strand
A_19_P00317929	0.0412	up	1.37	na	na	na	na	na	na	na	na	na	9		CTCTGGTACACTTCAGATTACTTACCTAATACATATTGAGGGCTTTTAACCCTTAGTTTT	lincRNA:chr8:141532461-141536259_R	lincRNA:chr8:141532461-141536259_R	lincRNA:chr8:141532461-141536259 reverse strand
A_19_P00317953	0.00164	up	3.47	na	0.00799498	down	-5.11	na	0.0138	up	1.77	na	3		CTTGGGTCTTAGCCACATCCTCCAGTCCATCTGGACTAGCAATAAAGCTGACATTTTAAT	lincRNA:chr17:38676963-38683249_F	lincRNA:chr17:38676963-38683249_F	lincRNA:chr17:38676963-38683249 forward strand
A_19_P00317963	na	na	na	na	na	na	na	na	0.0306	up	1.63	na	9		ATATCAAAATTTGCCATGGTGCCCAGCATGGTTCAAGATCATAAGTGTCAAGCACATCAG	lincRNA:chr6:138145483-138147031_R	lincRNA:chr6:138145483-138147031_R	lincRNA:chr6:138145483-138147031 reverse strand
A_19_P00317984	0.0221	up	1.76	na	0.00221443	up	3.12	na	na	na	na	na	6		CTTCCAGAACATCTGGGAGAATATTTAATGGAAAATCGCTTGGTTAAAACCTGACACTTT	lincRNA:chr6:86387160-86387908_R	lincRNA:chr6:86387160-86387908_R	lincRNA:chr6:86387160-86387908 reverse strand
A_19_P00317999	na	na	na	na	na	na	na	na	0.0217	up	2.48	na	9		AGGCATGGGGTTGTTTCCTGAAATGAGGCAAGGACTTTGGACAAGAACATGTTTGGACTT	lincRNA:chr2:178182443-178183091_R	lincRNA:chr2:178182443-178183091_R	lincRNA:chr2:178182443-178183091 reverse strand
A_19_P00318013	0.00299	up	1.72	na	0.0020014	up	3.39	na	0.0498	down	-1.24	na	3		TGACTTTTTCTGTGCTATGGACCATTGTCCTCTCACCCACTCAATAAATCTTGAAACATG	lincRNA:chr20:37076477-37079563_F	lincRNA:chr20:37076477-37079563_F	lincRNA:chr20:37076477-37079563 forward strand
A_19_P00318014	0.00955	up	1.76	na	0.007934	up	3.08	na	na	na	na	na	6		TGTGACTCATGGCTGGACCTTCTTGCCCCTATTGTCTCAGCACAACATTATTCGACTTTT	lincRNA:chr20:37076477-37079563_F	lincRNA:chr20:37076477-37079563_F	lincRNA:chr20:37076477-37079563 forward strand
A_19_P00318029	na	na	na	na	na	na	na	na	0.0499	down	-1.41	na	9		AAACATGTGAGGACAGCGATGGTTTTGCAGTTTCTGGCGCCGCCCGCAACACAACTCCAG	lincRNA:chr9:137444583-137445743_F	lincRNA:chr9:137444583-137445743_F	lincRNA:chr9:137444583-137445743 forward strand
A_19_P00318085	0.0283	up	1.48	na	na	na	na	na	na	na	na	na	9		TGAATAGCACATGGCTCCTGTGGTGGATCTGATAGTGGCATAGCACCAAGTGATGCAGGC	lincRNA:chr6:30260270-30282073_R	lincRNA:chr6:30260270-30282073_R	lincRNA:chr6:30260270-30282073 reverse strand
A_19_P00318140	na	na	na	na	na	na	na	na	0.0431	up	1.54	na	9		CTTCAGGCCCCTGTGAGGCTGACTCTGTAGTCCTGGAGAAACTCAACAGCCAGGAACTTA	lincRNA:chr3:158458229-158460872_F	lincRNA:chr3:158458229-158460872_F	lincRNA:chr3:158458229-158460872 forward strand
A_19_P00318152	na	na	na	na	na	na	na	na	0.00667	down	-3.77	na	9		TCCTCCGCGCGGTTACCCCTGTACCCGCCGCCATCCGTCCTGGCGCTCCGGATGAGTCAA	lincRNA:chr20:37075338-37076133_F	lincRNA:chr20:37075338-37076133_F	lincRNA:chr20:37075338-37076133 forward strand
A_19_P00318189	na	na	na	na	na	na	na	na	0.044	up	2.04	na	9		CAGGTCCTAAACTGTAGCTTGCAATGTGCCTGTTTCCAGAAACCAAGGTGAAAGTGCTTT	lincRNA:chr7:30601413-30603609_R	lincRNA:chr7:30601413-30603609_R	lincRNA:chr7:30601413-30603609 reverse strand
A_19_P00318191	na	na	na	na	na	na	na	na	0.0388	up	1.85	na	9		GGACCATTGTTTCCGTAACCTCGTTTTCTGTGTCCAGCTGACACACCTTCAAAGTGGCAT	lincRNA:chr7:30601413-30603609_R	lincRNA:chr7:30601413-30603609_R	lincRNA:chr7:30601413-30603609 reverse strand
A_19_P00318213	0.043	up	1.68	na	0.034054	down	-2.06	na	na	na	na	na	6		TCCTGTGAATTCTATGCTCTAGCTTGGGTTAAGGGATTTGGAATTGCACTTGTTTCAGAG	lincRNA:chr6:30262701-30282261_R	lincRNA:chr6:30262701-30282261_R	lincRNA:chr6:30262701-30282261 reverse strand
A_19_P00318280	0.0135	up	2.99	na	na	na	na	na	na	na	na	na	9		TTCTCCACCTGCCAACACTCAGTTGCTGGTGAGTAACCAGCATACGGACTCTCACTTCCT	lincRNA:chr7:130598222-130606452_F	lincRNA:chr7:130598222-130606452_F	lincRNA:chr7:130598222-130606452 forward strand
A_19_P00318304	0.00163	up	2.71	na	0.0143974	up	2.3	na	na	na	na	na	6		TGTGTGCCCAGTGGCCCCAGGTGACGTGTCTTCAAGAAGAGGCTGAGCTGCGGTGCTTGT	lincRNA:chr20:37050986-37063998_R	lincRNA:chr20:37050986-37063998_R	lincRNA:chr20:37050986-37063998 reverse strand
A_19_P00318348	na	na	na	na	na	na	na	na	0.0218	down	-2.87	na	9		CGCTGTGAGGGCTCCTCCATCTCCTCCCACCCCGTGACCTGCTCGACGCGCAACAGCCCG	lincRNA:chr18:33161080-33207449_F	lincRNA:chr18:33161080-33207449_F	lincRNA:chr18:33161080-33207449 forward strand
A_19_P00318398	0.00941	up	1.64	na	na	na	na	na	na	na	na	na	9		GACACAAGCCAGGAAGGAAGCTCTTCAGTGCAGCTGTGAATAGAGAAATGCTGGCTGAGG	lincRNA:chr8:128174180-128181362_R	lincRNA:chr8:128174180-128181362_R	lincRNA:chr8:128174180-128181362 reverse strand
A_19_P00318399	na	na	na	na	na	na	na	na	0.00165	down	-1.48	na	9		TTTTCCCACAGTGATGCTGGGTGGTGGCCCCAGGCTCCTCTGGGGTGTTCTGCCTCTTCA	lincRNA:chr8:129111523-129113388_R	lincRNA:chr8:129111523-129113388_R	lincRNA:chr8:129111523-129113388 reverse strand
A_19_P00318409	0.0332	down	-1.5	na	0.00157824	up	2.99	na	0.000584	up	3.72	na	3		ACTAGGAGAAGGGAATGGTGGGTACACCGGTAGTGCTCTTTTGTTCTTGCTTCGTTTTTT	lincRNA:chr11:65191086-65192284_F	lincRNA:chr11:65191086-65192284_F	lincRNA:chr11:65191086-65192284 forward strand
A_19_P00318494	na	na	na	na	0.011236	up	2.16	na	0.00818	up	3.08	na	6		TACAAAAACATTGATGCGCTGGCTTGGGGATTTGAATTTGAACATCTTTCACACTAAGTT	lincRNA:chr1:211556096-211605878_F	lincRNA:chr1:211556096-211605878_F	lincRNA:chr1:211556096-211605878 forward strand
A_19_P00318495	na	na	na	na	0.031635	up	2.13	na	0.00121	up	3.6	na	6		TTTCCAAGCTCAGCGTTTTGGTGTAAGGCGGCCAAAGAAGGATGCGGAGCCCAGCACTGT	lincRNA:chr1:211556096-211605878_F	lincRNA:chr1:211556096-211605878_F	lincRNA:chr1:211556096-211605878 forward strand
A_19_P00318533	0.0235	down	-1.28	na	na	na	na	na	na	na	na	na	9		TTACTGAGTTTTCCAACCATTTACTATGTGTTGAGATTGGTGGGTTTTCTGGCTGTTTTT	lincRNA:chr8:42883314-42885682_F	lincRNA:chr8:42883314-42885682_F	lincRNA:chr8:42883314-42885682 forward strand
A_19_P00318537	0.0171	up	2.14	na	0.0355953	down	-1.45	na	0.0258	down	-2.02	na	3		TATCTGCTTTCCAAAAACATGGAGCTAAGATCCCAGCACTGAGAAGATGGGCATTCCTAG	lincRNA:chr11:13000565-13002547_R	lincRNA:chr11:13000565-13002547_R	lincRNA:chr11:13000565-13002547 reverse strand
A_19_P00318539	0.00609	up	1.83	na	na	na	na	na	0.00623	down	-1.85	na	6		GCAAAGGTTTTCAGTCCTAGTCCATCATGACCACATAGCTGGAATACACTTATTTCACTT	lincRNA:chr11:13000565-13002547_R	lincRNA:chr11:13000565-13002547_R	lincRNA:chr11:13000565-13002547 reverse strand
A_19_P00318569	0.0407	up	2.47	na	na	na	na	na	na	na	na	na	9		GATCACCAACTCCATGGTCTTAGGACTTCCTTGGACTGTCCTTGGATCTAAGGCTGAGAC	lincRNA:chr20:37049663-37063889_F	lincRNA:chr20:37049663-37063889_F	lincRNA:chr20:37049663-37063889 forward strand
A_19_P00318587	na	na	na	na	0.00896702	up	2.41	na	0.014	up	1.64	na	6		GGGGAACGGAGAAGAATCCACCGGGGAAGTGGACGGGGCTGGCTCCCGGGCCTGGCGCTG	lincRNA:chr5:108063520-108063994_R	lincRNA:chr5:108063520-108063994_R	lincRNA:chr5:108063520-108063994 reverse strand
A_19_P00318599	0.0256	down	-1.23	na	na	na	na	na	0.000396	up	2.09	na	6		CATACGACAAATGATGTAGAGCCTTTCCTATTTCCCTTCCTGCTGTGTCATCCGAAACAA	lincRNA:chr5:43016161-43018426_R	lincRNA:chr5:43016161-43018426_R	lincRNA:chr5:43016161-43018426 reverse strand
A_19_P00318600	0.0288	down	-1.21	na	0.0185375	up	1.32	na	0.00355	up	1.75	na	3		AGTATGAAAATGGCTAGAGATTGGGTAGAATTGAGCAGGCTGGCAATGGCAGTTTTGTGT	lincRNA:chr5:43016161-43018426_R	lincRNA:chr5:43016161-43018426_R	lincRNA:chr5:43016161-43018426 reverse strand
A_19_P00318604	na	na	na	na	na	na	na	na	0.0491	up	1.79	na	9		GTCTCTTTGAGGGGGCTCAACTCACAAAGTGCAGATTTTTATTGAAATATGAATGCTTGT	lincRNA:chr5:42985499-42991206_F	lincRNA:chr5:42985499-42991206_F	lincRNA:chr5:42985499-42991206 forward strand
A_19_P00318670	na	na	na	na	na	na	na	na	0.0209	up	4.92	na	9		TAGTAATCCACAAAGCTGAAGAAGGCTGCATCATGTTTGGGACTTGTTCCCCGCTCATTT	lincRNA:chr9:118701880-118718967_F	lincRNA:chr9:118701880-118718967_F	lincRNA:chr9:118701880-118718967 forward strand
A_19_P00318706	0.0167	up	3.19	na	0.0367898	down	-1.64	na	na	na	na	na	6		TAGAACGATGGCTTTGCTGAGCTTTCGGGAGCCAATGCAGGAGTCCTGCTGCTGGCATGT	lincRNA:chr2:224569557-224588760_R	lincRNA:chr2:224569557-224588760_R	lincRNA:chr2:224569557-224588760 reverse strand
A_19_P00318715	na	na	na	na	na	na	na	na	0.00862	up	2.74	na	9		ATAATTTGCCATCTGGAGTTTCTCTGCCTTGCTGATCTGAGCTCAGACCTGCCAATTTAC	lincRNA:chr7:130736639-130792533_R	lincRNA:chr7:130736639-130792533_R	lincRNA:chr7:130736639-130792533 reverse strand
A_19_P00318813	na	na	na	na	na	na	na	na	0.0436	down	-2.03	na	9		TGGCCCGCAGCCTCCCTGCCAGCACGCCTGGCTTCCCGGCCTCGGAACTTGATCTGCTCC	lincRNA:chr17:77893268-77899261_F	lincRNA:chr17:77893268-77899261_F	lincRNA:chr17:77893268-77899261 forward strand
A_19_P00318848	na	na	na	na	na	na	na	na	0.0133	up	2.59	na	9		TGGGCGTGGACCCTTGTGCAAACCCCACTGGAAGAAAAACCTTACAGCTCAGGAGGAGGA	lincRNA:chr11:2004466-2011150_R	lincRNA:chr11:2004466-2011150_R	lincRNA:chr11:2004466-2011150 reverse strand
A_19_P00318857	na	na	na	na	na	na	na	na	0.0431	down	-2.06	na	9		ACAAAATATTACAAACCAGGATGTCTAAGAGCAGAAGTCCGTGGTTGCCACCTCTCAAGC	lincRNA:chr1:23610855-23612017_R	lincRNA:chr1:23610855-23612017_R	lincRNA:chr1:23610855-23612017 reverse strand
A_19_P00318909	na	na	na	na	0.0138533	down	-2.11	na	na	na	na	na	9		TTTGGAAATGCCCATTCAGCCCTCAGAGCTCCTCTGCTTTAAGGGTGATGGACTTCCTGT	lincRNA:chr4:90602675-90606883_F	lincRNA:chr4:90602675-90606883_F	lincRNA:chr4:90602675-90606883 forward strand
A_19_P00318927	0.00975	up	1.61	na	0.00613124	up	1.61	na	0.0131	down	-1.48	na	3		AAACCTCCTCCTGGGCTTATCAAGGTTAGTGTGAAGTTTGTACTCTTGGTTATCCCACTA	lincRNA:chr7:32969506-32973492_R	lincRNA:chr7:32969506-32973492_R	lincRNA:chr7:32969506-32973492 reverse strand
A_19_P00318930	na	na	na	na	na	na	na	na	0.0394	up	1.94	na	9		GCAATGCTGGATACACACTACCAACTATTACTTCCCTGACTGAGCCAATTTTTCTGTAAA	lincRNA:chr15:50653887-50654969_F	lincRNA:chr15:50653887-50654969_F	lincRNA:chr15:50653887-50654969 forward strand
A_19_P00319019	0.02	up	1.76	na	0.00433737	up	3.11	na	0.049	down	-1.57	na	3		CCACGAGGTTTACTTGACTGTTGTGTGAAAAGCTGATAAGAAAACCATCCAGAAAAAAGC	lincRNA:chr6:86386841-86387899_R	lincRNA:chr6:86386841-86387899_R	lincRNA:chr6:86386841-86387899 reverse strand
A_19_P00319036	na	na	na	na	0.0272163	up	2.9	na	na	na	na	na	9		TTCTCTCTTAAAAATGCAACATTCTGACAGCATGTGGAGGCTTGGATGGAAACACGGTAA	lincRNA:chr10:118588285-118590480_R	lincRNA:chr10:118588285-118590480_R	lincRNA:chr10:118588285-118590480 reverse strand
A_19_P00319095	0.00146	up	1.7	na	0.0016865	up	2.97	na	0.0253	down	-1.28	na	3		TGTCTGCCCATTGATAGAGGCCAGATTGTCTTGGAAGTTCCAAAGTTGCAACGATTTCTG	lincRNA:chr6:86387140-86387958_R	lincRNA:chr6:86387140-86387958_R	lincRNA:chr6:86387140-86387958 reverse strand
A_19_P00319119	na	na	na	na	na	na	na	na	0.00633	down	-3.27	na	9		CCTCCTCCAGGGGCCGCAGTGTCACCTCCAGGTAGGCATCCTTCAGTGTGGCCAGGGGCC	lincRNA:chr16:11481046-11485922_F	lincRNA:chr16:11481046-11485922_F	lincRNA:chr16:11481046-11485922 forward strand
A_19_P00319273	0.000322	up	1.55	na	0.00103875	up	2.23	na	0.0185	down	-1.28	na	3		TTCAATTCAAATATGTGCACGTGGATTTCTTTGTTTCTCTGAGGTTTGACTTATCTGCCA	lincRNA:chr8:128216723-128217897_R	lincRNA:chr8:128216723-128217897_R	lincRNA:chr8:128216723-128217897 reverse strand
A_19_P00319286	na	na	na	na	na	na	na	na	0.0297	up	3.47	na	9		TAAAAAGCCACGTGAAGCCTGGAGATACTGGACATAGCAGATTTGTCAAGCCATTTTTCC	lincRNA:chr5:38812198-38814135_R	lincRNA:chr5:38812198-38814135_R	lincRNA:chr5:38812198-38814135 reverse strand
A_19_P00319295	0.042	down	-1.76	na	na	na	na	na	na	na	na	na	9		ATTGTGAGCCCGTGGACACTTCTGTACAATAAATCTGCTATTATTACTTCTAGAACTACA	lincRNA:chr20:3856298-3856770_F	lincRNA:chr20:3856298-3856770_F	lincRNA:chr20:3856298-3856770 forward strand
A_19_P00319323	na	na	na	na	na	na	na	na	0.0346	up	3.89	na	9		CATCATCTTGACAGTACTTTCCTGGATGAGTGTTCAGGAAACATGAAAAGTTTTTAAACA	lincRNA:chr3:171506370-171528740_R	lincRNA:chr3:171506370-171528740_R	lincRNA:chr3:171506370-171528740 reverse strand
A_19_P00319324	na	na	na	na	na	na	na	na	0.0285	up	3.37	na	9		GTAGATAACCACAAGCAGATGTGTCAAAGCTCTTTTGTCCAGGAATAAACTGAGTTTCGT	lincRNA:chr3:171506370-171528740_R	lincRNA:chr3:171506370-171528740_R	lincRNA:chr3:171506370-171528740 reverse strand
A_19_P00319376	0.0432	up	1.53	na	na	na	na	na	na	na	na	na	9		TTCTGAAGACACTCCTGAGCTCCCAACACCGGGCAACTCTCTTCCAGAGGATAGTGGGGT	lincRNA:chr4:68586647-68587436_F	lincRNA:chr4:68586647-68587436_F	lincRNA:chr4:68586647-68587436 forward strand
A_19_P00319404	na	na	na	na	0.0422262	down	-2.12	na	na	na	na	na	9		GGTTGACTGCTCTGGTGTTTTTATATTCATTCGTGCTTTAGCATATAAATTCTTCAGCAT	lincRNA:chr6:72124148-72130448_R	lincRNA:chr6:72124148-72130448_R	lincRNA:chr6:72124148-72130448 reverse strand
A_19_P00319413	0.0195	down	-1.35	na	na	na	na	na	0.00585	up	2.07	na	6		ACCACTATTTTTAAGATTCACAGATGTTCGGGTCCAATTCACCAGAATGCCAAGTTATAC	lincRNA:chr8:32785498-32902078_F	lincRNA:chr8:32785498-32902078_F	lincRNA:chr8:32785498-32902078 forward strand
A_19_P00319432	na	na	na	na	na	na	na	na	0.0371	down	-1.48	na	9		CCACGCGCCCCCAGCCCTCGCATCCTCGCGCCCCGGCCAGGACGACATCGCGGCACCTGC	lincRNA:chr7:32957031-32982645_F	lincRNA:chr7:32957031-32982645_F	lincRNA:chr7:32957031-32982645 forward strand
A_19_P00319465	0.0118	down	-1.76	na	na	na	na	na	na	na	na	na	9		GAGCCCAATGGCTAGAGGGCTCTGCTCCAAGTCATTGCTTACTACACCCACAAACATTCT	lincRNA:chr20:3854429-3856093_F	lincRNA:chr20:3854429-3856093_F	lincRNA:chr20:3854429-3856093 forward strand
A_19_P00319476	na	na	na	na	na	na	na	na	0.0156	down	-1.46	na	9		CCCTGCGTCATGGATTTCAAGGTCTTTTAATCACCTTCGGTTTAATCTCTTTTTAAAAGA	lincRNA:chr11:65266957-65271093_R	lincRNA:chr11:65266957-65271093_R	lincRNA:chr11:65266957-65271093 reverse strand
A_19_P00319525	0.0303	down	-1.42	na	na	na	na	na	0.0129	up	1.53	na	6		AGTGTTTTCTTATTTAGCCGGAGTGAGAAGCAAGAAGGCCCTGGACACAGCAATATCTCT	lincRNA:chr6:99968954-99979666_F	lincRNA:chr6:99968954-99979666_F	lincRNA:chr6:99968954-99979666 forward strand
A_19_P00319567	na	na	na	na	0.00720285	down	-1.54	na	0.0219	up	1.86	na	6		CTTTCATGTGTATTCTTTCTGGCAACAAGATCATAAGCCTTTCTGCTCCAGCATCAAGCC	lincRNA:chr8:67834252-67838633_R	lincRNA:chr8:67834252-67838633_R	lincRNA:chr8:67834252-67838633 reverse strand
A_19_P00319584	0.0236	up	1.47	na	na	na	na	na	na	na	na	na	9		GACGCTCACGGGCGCGCGGACTATCGGGCGGCTAGGCTCTCTGAGGAGGCTGCCACAGTG	lincRNA:chr19:58816749-58823701_F	lincRNA:chr19:58816749-58823701_F	lincRNA:chr19:58816749-58823701 forward strand
A_19_P00319588	na	na	na	na	na	na	na	na	0.0103	up	4.23	na	9		ACAAAAGAAGAGATTGCCTTAGGGAAGGGGACTACAGTGAACACTGAGAACTTCTTCCCA	lincRNA:chr3:106561753-106632109_R	lincRNA:chr3:106561753-106632109_R	lincRNA:chr3:106561753-106632109 reverse strand
A_19_P00319591	0.00526	down	-1.4	na	na	na	na	na	0.00478	up	2.03	na	6		CTATTTTTAAGATTCACAGATGTTCGGGTCCAATTCACCAGAATGCCAAGTTATACAGGG	lincRNA:chr8:32785489-32902343_F	lincRNA:chr8:32785489-32902343_F	lincRNA:chr8:32785489-32902343 forward strand
A_19_P00319606	na	na	na	na	na	na	na	na	0.0116	down	-1.33	na	9		ACAGACCCCACAGGCCCATCCTGGAAGACAAAAGAGCCAACCACACCGCAGGAGAAAACT	lincRNA:chr22:27062507-27064189_R	lincRNA:chr22:27062507-27064189_R	lincRNA:chr22:27062507-27064189 reverse strand
A_19_P00319623	na	na	na	na	0.0188549	up	1.8	na	na	na	na	na	9		CAAGGCGTCCGAAGTATGAGTCCACTAACAAAAGTCCAGAAACTCGCCAGTTAATAGTAT	lincRNA:chrX:73164180-73167347_F	lincRNA:chrX:73164180-73167347_F	lincRNA:chrX:73164180-73167347 forward strand
A_19_P00319633	na	na	na	na	na	na	na	na	0.0301	down	-1.95	na	9		CCGAGCATCTCAGGCCGCCGCGGGGACCCCCCCTAAGGGACTCGGGAACACCTGCCTACC	lincRNA:chr6:32862169-32868745_F	lincRNA:chr6:32862169-32868745_F	lincRNA:chr6:32862169-32868745 forward strand
A_19_P00319646	0.0473	up	3.15	na	0.0427212	up	9.23	na	na	na	na	na	6		TGGTTCATCCTTGTCCAAATGCAGAGTCAGAGCTATTTGTACTTCATTATTATTTCCAAG	lincRNA:chr17:70399468-70588943_R	lincRNA:chr17:70399468-70588943_R	lincRNA:chr17:70399468-70588943 reverse strand
A_19_P00319675	na	na	na	na	0.0239241	up	2.28	na	0.0085	up	2.35	na	6		CTGCATTGCGGTGATAGGGCCAAGGGCCTGGGCCTTCAATTCTCCAGACTTGCCAAAATG	lincRNA:chr9:132251423-132266198_F	lincRNA:chr9:132251423-132266198_F	lincRNA:chr9:132251423-132266198 forward strand
A_19_P00319725	na	na	na	na	na	na	na	na	0.0432	down	-1.44	na	9		CAGAATTCCTTTCTCCCTCCTGAGAGCTTCAGTAGCACTTTAAAAATAATACTCCTCGAG	lincRNA:chr15:70487976-70490848_R	lincRNA:chr15:70487976-70490848_R	lincRNA:chr15:70487976-70490848 reverse strand
A_19_P00319760	na	na	na	na	na	na	na	na	0.00503	down	-3.19	na	9		TCTCAAGGACCTTTTTTTCCCTCTTCCTCCTTTCACGATGGAGCCAGACCCTGCACGCAG	lincRNA:chr20:31148894-31161690_F	lincRNA:chr20:31148894-31161690_F	lincRNA:chr20:31148894-31161690 forward strand
A_19_P00319845	0.0409	up	2.19	na	na	na	na	na	na	na	na	na	9		AGCGTGGGAAAAATCAAGATGTCTGCAGATTTCGAGAGATGGGGTGCGGTGGCGTGCGAT	lincRNA:chr20:37049265-37063981_F	lincRNA:chr20:37049265-37063981_F	lincRNA:chr20:37049265-37063981 forward strand
A_19_P00319854	na	na	na	na	0.0492895	down	-1.74	na	0.00348	up	1.89	na	6		TTCTCACAGTGCTGCCATCTTTCCTCCGTGTGAGCGTGGGCTGTGCGGAGAGTGGACCTC	lincRNA:chr16:88737682-88738356_F	lincRNA:chr16:88737682-88738356_F	lincRNA:chr16:88737682-88738356 forward strand
A_19_P00319857	na	na	na	na	na	na	na	na	0.0129	down	-2.92	na	9		TGGAAACTGGAACACAGACTCCTCCAGCAGCTCCACAGGTCCCTTGTCCTCAATGAGCAG	lincRNA:chrX:53123326-53152924_F	lincRNA:chrX:53123326-53152924_F	lincRNA:chrX:53123326-53152924 forward strand
A_19_P00319889	0.00171	up	3.23	na	na	na	na	na	na	na	na	na	9		TGGCATGTGGGGATGATGGTCTGAAGGTCATCACAGCCTCTCTTGATGACATCCTTCCTC	lincRNA:chr2:224569352-224588757_R	lincRNA:chr2:224569352-224588757_R	lincRNA:chr2:224569352-224588757 reverse strand
A_19_P00319917	na	na	na	na	0.0165133	up	3.61	na	0.00901	up	5.51	na	6		ATGCACTTGTAAAAGTCAGACCAAGCTCAGCTCAGATTTCAGTTTTATTAGAAGTATGTC	lincRNA:chr22:45529709-45548465_R	lincRNA:chr22:45529709-45548465_R	lincRNA:chr22:45529709-45548465 reverse strand
A_19_P00319970	0.0277	up	1.18	na	na	na	na	na	0.0042	down	-1.33	na	6		GTATATCTCTATCCTTTTGTTTCCATTACTCACTTTCTGTGGCTGCTGCTGCAGAAGCCA	lincRNA:chr6:30271849-30272880_R	lincRNA:chr6:30271849-30272880_R	lincRNA:chr6:30271849-30272880 reverse strand
A_19_P00319971	0.0445	up	1.44	na	na	na	na	na	na	na	na	na	9		TCCATCCTGGCTCATCTCCTCTGTGTTCTCATAGCATCATATTATAGAATGGATCACAAA	lincRNA:chr13:44716725-44722166_F	lincRNA:chr13:44716725-44722166_F	lincRNA:chr13:44716725-44722166 forward strand
A_19_P00319981	na	na	na	na	na	na	na	na	0.00994	up	1.58	na	9		ATGACCGTGTGGAGAAAGTTCTTTCCCTGAGGACCATCTGGAGTGGACGCGTGCACTACC	lincRNA:chr9:132101068-132104183_F	lincRNA:chr9:132101068-132104183_F	lincRNA:chr9:132101068-132104183 forward strand
A_19_P00320022	na	na	na	na	0.0416852	up	1.88	na	na	na	na	na	9		CTAATTAGGCTTTGTGTAACTCAGTGTTGCAAAGCTTTGACATCTGTTTGAGTTAATGTT	lincRNA:chr19:57815819-57816419_F	lincRNA:chr19:57815819-57816419_F	lincRNA:chr19:57815819-57816419 forward strand
A_19_P00320067	0.000731	down	-2.97	na	0.00626928	down	-2.05	na	0.00114	up	4.6	na	3		GGGCAGACCCCGACTTCAGAATTTATACAAATAAATGCAATGAAAAGTGCTGGCAACCTG	lincRNA:chr1:852245-854050_R	lincRNA:chr1:852245-854050_R	lincRNA:chr1:852245-854050 reverse strand
A_19_P00320090	0.0132	up	1.71	na	0.00240458	up	2.02	na	0.00232	down	-1.55	na	3		GCACAATTTGGGCCACTCACAAGAGTGTATACCCTGTGATAAACAGTTACCTACATTCTC	lincRNA:chr17:75085302-75091067_F	lincRNA:chr17:75085302-75091067_F	lincRNA:chr17:75085302-75091067 forward strand
A_19_P00320094	0.0155	up	1.72	na	0.00505853	up	2.98	na	0.0244	down	-1.63	na	3		CCAGAACATCTGGGAGAATATTTAATGGAAAATCGCTTGGTTAAAACCTGACACTTTTAA	lincRNA:chr6:86387186-86387977_R	lincRNA:chr6:86387186-86387977_R	lincRNA:chr6:86387186-86387977 reverse strand
A_19_P00320133	na	na	na	na	na	na	na	na	0.0136	down	-2.05	na	9		ACCTTCAAGCTGAGGACTTACCACTTTTCTTCGATTATGAAAAATGCTCAGCCAATAGCT	lincRNA:chr15:49021279-49022041_R	lincRNA:chr15:49021279-49022041_R	lincRNA:chr15:49021279-49022041 reverse strand
A_19_P00320141	na	na	na	na	na	na	na	na	0.0489	up	2.15	na	9		AATAGACATGTCTTTGTCTTGAGGAGTGTCCATCTGAATTGAAAATGTGTCAGCTTTTTT	lincRNA:chr5:92745064-92906499_R	lincRNA:chr5:92745064-92906499_R	lincRNA:chr5:92745064-92906499 reverse strand
A_19_P00320158	na	na	na	na	na	na	na	na	0.0348	down	-1.61	na	9		TGAATGAATATCTGGTTTTGTCTCTGCTGGGCCTGTGTGCCTGGAAAGGAATTGTTTTGG	lincRNA:chr17:75085302-75089840_F	lincRNA:chr17:75085302-75089840_F	lincRNA:chr17:75085302-75089840 forward strand
A_19_P00320226	na	na	na	na	na	na	na	na	0.0446	up	2.74	na	9		TGTGGATAAAGCATAAACGCAGTGAAGTGTGTGTGGCTGGAAGATTTAATGCCTCTACAG	lincRNA:chrX:149184264-149185018_F	lincRNA:chrX:149184264-149185018_F	lincRNA:chrX:149184264-149185018 forward strand
A_19_P00320259	na	na	na	na	na	na	na	na	0.00667	down	-2.38	na	9		CCCAGCTCGGAGCACCTGGCCAGTGGGACCGGTGGGTTCCTGGTGCCTGAATCCGGCTGT	lincRNA:chr4:53588784-53617753_R	lincRNA:chr4:53588784-53617753_R	lincRNA:chr4:53588784-53617753 reverse strand
A_19_P00320309	na	na	na	na	na	na	na	na	0.0338	down	-1.59	na	9		CCTTCTCCCAGGCTCTTCTGGGACTGGTGTGGCCATACACTTCAGATCCTTCACCAGAAC	lincRNA:chr21:43099535-43117496_R	lincRNA:chr21:43099535-43117496_R	lincRNA:chr21:43099535-43117496 reverse strand
A_19_P00320324	na	na	na	na	0.00156774	up	2.08	na	na	na	na	na	9		ACATTCATTATCTTCACTGGCTACTCGTCCACACTCAGAACGCTGTTCACTGACAAAAAA	lincRNA:chr6:86386799-86387711_F	lincRNA:chr6:86386799-86387711_F	lincRNA:chr6:86386799-86387711 forward strand
A_19_P00320374	na	na	na	na	na	na	na	na	0.0389	down	-1.69	na	9		CCTCACTGATATCGGCTTGATCATCTGAGTCAGTGGGCTCATTGTGGAAACATATGGAAT	lincRNA:chr9:14588795-14590063_R	lincRNA:chr9:14588795-14590063_R	lincRNA:chr9:14588795-14590063 reverse strand
A_19_P00320396	0.0493	up	1.45	na	na	na	na	na	na	na	na	na	9		AGATGCTGCTCACAGAACCAAATTTCCTGTGCTGAATTGTCACTCATGGGCTTGAGAGTA	lincRNA:chr6:30262257-30263993_R	lincRNA:chr6:30262257-30263993_R	lincRNA:chr6:30262257-30263993 reverse strand
A_19_P00320449	na	na	na	na	0.0478435	up	2.09	na	0.00794	up	2.32	na	6		TCCATCGGTGAGCTCCCGCCTGCCACCTCTGGGCCTGCATTGCGGTGATAGGGCCAAGGG	lincRNA:chr9:132253298-132266185_F	lincRNA:chr9:132253298-132266185_F	lincRNA:chr9:132253298-132266185 forward strand
A_19_P00320469	na	na	na	na	0.0180473	up	6.63	na	na	na	na	na	9		CCCACTTAGACTTAAGCCCTCTTAATTTCAAAATTACGTTCATATGTGCCAATAAAGTTG	lincRNA:chr9:2535671-2536375_R	lincRNA:chr9:2535671-2536375_R	lincRNA:chr9:2535671-2536375 reverse strand
A_19_P00320500	na	na	na	na	0.0153201	up	2.66	na	na	na	na	na	9		TTAAAAGTGTCAGGTTTTAACCAAGCGATTTTCCATTAAATATTCTCCCAGATGTTCTGG	lincRNA:chr6:86386850-86387907_F	lincRNA:chr6:86386850-86387907_F	lincRNA:chr6:86386850-86387907 forward strand
A_19_P00320532	na	na	na	na	na	na	na	na	0.00669	down	-1.55	na	9		GGTGGAATTGCTCAGTGCTCCCATAAATATACATTTATAATTTTCATTTGCCACATGGTA	lincRNA:chr15:25363491-25364889_F	lincRNA:chr15:25363491-25364889_F	lincRNA:chr15:25363491-25364889 forward strand
A_19_P00320579	na	na	na	na	na	na	na	na	0.00791	up	2.64	na	9		AGGGAAATTCTCAAGAATACGCTCTACAAATCTACGTGCGCATCATTTTCACCTCGCGTC	lincRNA:chr7:130626518-130792822_R	lincRNA:chr7:130626518-130792822_R	lincRNA:chr7:130626518-130792822 reverse strand
A_19_P00320597	0.0323	up	1.44	na	na	na	na	na	na	na	na	na	9		TATGCAATAAAGAGTTTGACCATCTGCCTCCAAGAAATGGGGCTGACTTTGCCATCATGG	lincRNA:chr11:104774117-104789800_R	lincRNA:chr11:104774117-104789800_R	lincRNA:chr11:104774117-104789800 reverse strand
A_19_P00320602	na	na	na	na	0.0078304	up	2.49	na	0.00075	up	2.18	na	6		TGCAATGTTGTGCTCCTGTTAGTCTGATATCAGGGGCTTGCAGCCTGGCAAAGGAAAAAA	lincRNA:chr9:132251378-132267359_F	lincRNA:chr9:132251378-132267359_F	lincRNA:chr9:132251378-132267359 forward strand
A_19_P00320635	na	na	na	na	0.0210559	up	2.27	na	na	na	na	na	9		GTCAGGTTTTAACCAAGCGATTTTCCATTAAATATTCTCCCAGATGTTCTGGAAGTTTTT	lincRNA:chr6:86386801-86387887_F	lincRNA:chr6:86386801-86387887_F	lincRNA:chr6:86386801-86387887 forward strand
A_19_P00320640	na	na	na	na	0.00970045	up	1.76	na	na	na	na	na	9		ATTTCTTTCTCGCTGATCGCCTAACTTCTACTGACGAAGCTTGGAAGTTGCAGAAGGTAG	lincRNA:chrX:73164180-73164781_F	lincRNA:chrX:73164180-73164781_F	lincRNA:chrX:73164180-73164781 forward strand
A_19_P00320657	na	na	na	na	na	na	na	na	0.0242	down	-2.24	na	9		TCACAGTCCAGGGCTCTTTCTTTCCCTCCAAAAAGGTCACCAGGTCCAGCTTAGAGATGG	lincRNA:chr19:24216258-24240821_R	lincRNA:chr19:24216258-24240821_R	lincRNA:chr19:24216258-24240821 reverse strand
A_19_P00320664	0.0153	up	1.96	na	na	na	na	na	0.0145	up	2.02	na	6		AATGACCTCAAGCTGACCTTCCTGATGCAGATTCCACATATGGTATCTGAGACTCACACA	lincRNA:chr6:139013685-139018386_F	lincRNA:chr6:139013685-139018386_F	lincRNA:chr6:139013685-139018386 forward strand
A_19_P00320669	na	na	na	na	na	na	na	na	0.0491	down	-2.27	na	9		GGATGGTTTTCTTATCAGCTTTTCACACAACAGTCAAGTAAACCTCGTGGCACTAGCCCT	lincRNA:chr6:86386801-86387731_F	lincRNA:chr6:86386801-86387731_F	lincRNA:chr6:86386801-86387731 forward strand
A_19_P00320700	na	na	na	na	na	na	na	na	0.0326	down	-2.95	na	9		GATGCTGCTTCCTTCTTCATCAACACAGCCTCACCGCTCAGCATATTGCTGCTTAAGCTG	lincRNA:chr8:95986835-95996412_R	lincRNA:chr8:95986835-95996412_R	lincRNA:chr8:95986835-95996412 reverse strand
A_19_P00320708	na	na	na	na	na	na	na	na	0.0107	up	1.82	na	9		GCTGAGGCAGTGTCACGCTGGTGTCTGTCCTCCTTACAGAATGCCTGAACAGTTCCATTG	lincRNA:chr7:30590168-30601268_R	lincRNA:chr7:30590168-30601268_R	lincRNA:chr7:30590168-30601268 reverse strand
A_19_P00320715	na	na	na	na	na	na	na	na	0.0483	up	4.16	na	9		CTAGGATGCCAGACAGAAATACCAGTTGCAATGTTTTGTTGCATAAAGTTTATCCTAATT	lincRNA:chr3:106830589-106959470_R	lincRNA:chr3:106830589-106959470_R	lincRNA:chr3:106830589-106959470 reverse strand
A_19_P00320716	na	na	na	na	na	na	na	na	0.0421	up	3.61	na	9		CGAGAAATGCTATCTTGACCTGACCCTTTCTCCAAATAAATTGACAAAATATCTCATCGT	lincRNA:chr3:106830589-106959470_R	lincRNA:chr3:106830589-106959470_R	lincRNA:chr3:106830589-106959470 reverse strand
A_19_P00320719	na	na	na	na	0.02616	up	1.92	na	na	na	na	na	9		CAAGAGCAGCAAATGTGGTTTCATCAAGTGGGAAGAAAGCAGCAATTTAAAATAACTTTT	lincRNA:chr1:204525561-204527207_F	lincRNA:chr1:204525561-204527207_F	lincRNA:chr1:204525561-204527207 forward strand
A_19_P00320722	na	na	na	na	na	na	na	na	0.0476	up	4.05	na	9		GCTATTTACATTCCAGCTTCTTTTGAGAATCTCTGAAGATGATTAAGTCATTGTCAGCTG	lincRNA:chr15:40356662-40357812_F	lincRNA:chr15:40356662-40357812_F	lincRNA:chr15:40356662-40357812 forward strand
A_19_P00320723	na	na	na	na	na	na	na	na	0.0185	up	3.7	na	9		ATATGAAGAGTGAGAACTGTCTACATCTAAGTCTTCTTTGAGAACAATACCAGCTGAGCG	lincRNA:chr15:40356662-40357812_F	lincRNA:chr15:40356662-40357812_F	lincRNA:chr15:40356662-40357812 forward strand
A_19_P00320729	0.0429	down	-1.18	na	na	na	na	na	0.00738	up	2.31	na	6		CTAGAGCAAATTGTACACTCTCTTTGTGAATGGTCCTGTAACGTGTATGAACACATTTCT	lincRNA:chr16:80631802-80632239_R	lincRNA:chr16:80631802-80632239_R	lincRNA:chr16:80631802-80632239 reverse strand
A_19_P00320759	na	na	na	na	0.0100915	up	2.25	na	0.000794	up	3.46	na	6		ATCCTTTTCTGGGGGATCCTAGGCAGAAGCGATGGCAGGACAAAGGCAGAGAAGGCACTG	lincRNA:chr5:42985502-42991219_R	lincRNA:chr5:42985502-42991219_R	lincRNA:chr5:42985502-42991219 reverse strand
A_19_P00320791	na	na	na	na	0.0246824	down	-1.79	na	na	na	na	na	9		TGGAAAACATCTGTTATGATGACTTTCATACACCTTCACCTCAAAGGCTTTCTTGCACCT	lincRNA:chr8:67834228-67834962_F	lincRNA:chr8:67834228-67834962_F	lincRNA:chr8:67834228-67834962 forward strand
A_19_P00320792	0.00656	up	2.17	na	0.0124948	up	3.53	na	na	na	na	na	6		GGCTGTGCGGCTATCCTGGAGACAGATGACAGCTCTCCCTTGGATGGCTTTGCTGGTTCC	lincRNA:chr20:37075324-37079288_F	lincRNA:chr20:37075324-37079288_F	lincRNA:chr20:37075324-37079288 forward strand
A_19_P00320819	na	na	na	na	na	na	na	na	0.0224	down	-2.18	na	9		AATGCTCATCAGTGGGAAGATAGTGACTCCTGACCATTTTCCTCCTAGCTGGAAACTACA	lincRNA:chr7:22895704-22896694_F	lincRNA:chr7:22895704-22896694_F	lincRNA:chr7:22895704-22896694 forward strand
A_19_P00320841	0.00413	up	1.54	na	na	na	na	na	na	na	na	na	9		GTTGCCACCAGCACCTTGTAAGCCAGGGAGTGGTGTCACCTGTACTGTAGCAAAAGCACC	lincRNA:chr17:21434064-21435857_R	lincRNA:chr17:21434064-21435857_R	lincRNA:chr17:21434064-21435857 reverse strand
A_19_P00320846	na	na	na	na	0.0345494	up	2.7	na	na	na	na	na	9		TGGGGGTTGACAAATTCCCATCAAGCTCTGTGGATCTTGTACAACTGCTCACCACCGGCT	lincRNA:chr4:68586468-68587852_F	lincRNA:chr4:68586468-68587852_F	lincRNA:chr4:68586468-68587852 forward strand
A_19_P00320889	na	na	na	na	na	na	na	na	0.00428	up	1.81	na	9		ATAGAAAAATCCTGTGCATTGGTGAGTTGGCCCTGACCACCATTTTCTTAGCATGCTGAA	lincRNA:chr3:171506452-171528221_R	lincRNA:chr3:171506452-171528221_R	lincRNA:chr3:171506452-171528221 reverse strand
A_19_P00320914	na	na	na	na	0.019459	up	1.58	na	0.0221	up	1.45	na	6		TATCGGAGAATAATTTCTTTCTCGCTGATCGCCTAACTTCTACTGACGAAGCTTGGAAGT	lincRNA:chrX:73164163-73218675_F	lincRNA:chrX:73164163-73218675_F	lincRNA:chrX:73164163-73218675 forward strand
A_19_P00320924	na	na	na	na	0.0474477	down	-6.34	na	na	na	na	na	9		GTGAATTTAGGCCTACGTGAATAATAATATAATATTTACTATGATGTTACTATCTACCAA	lincRNA:chr5:27472398-27496506_F	lincRNA:chr5:27472398-27496506_F	lincRNA:chr5:27472398-27496506 forward strand
A_19_P00320927	na	na	na	na	na	na	na	na	0.00755	down	-1.78	na	9		TCCCCACCCGTGTGTGTATGTAGGTGTCTCTGTAGACAGTGATTAAAAATACTCCTGACT	lincRNA:chr12:1612439-1613590_F	lincRNA:chr12:1612439-1613590_F	lincRNA:chr12:1612439-1613590 forward strand
A_19_P00320948	na	na	na	na	na	na	na	na	0.0076	up	1.96	na	9		GACCTGAGGCTTGCAGCGCTGGGCCCGGCCGGGTCGCTGCGGCTGGGCTGGAGGTGAGGC	lincRNA:chr4:15683450-15688559_F	lincRNA:chr4:15683450-15688559_F	lincRNA:chr4:15683450-15688559 forward strand
A_19_P00320966	na	na	na	na	na	na	na	na	0.0488	down	-1.76	na	9		AGAATTCCCTCCCACCCCCAGATTTTCGCAGGGTTTTGTTGATTTCCCCTCAACTTTCCA	lincRNA:chr8:126934614-126963493_R	lincRNA:chr8:126934614-126963493_R	lincRNA:chr8:126934614-126963493 reverse strand
A_19_P00320975	na	na	na	na	0.0390837	down	-1.53	na	0.00705	up	1.38	na	6		ACAATTAAACAAGCAGCCCCTGTCTCTTTTTCTCCACTTTCAGTCTTGGGGAAGGGATTG	lincRNA:chr18:3347773-3348250_R	lincRNA:chr18:3347773-3348250_R	lincRNA:chr18:3347773-3348250 reverse strand
A_19_P00321009	na	na	na	na	0.00539472	up	3.22	na	na	na	na	na	9		GAAGTTACCTGAGAATGGATCCATTCCCTGCAACTGAAGATTCTAAGGAACTGGGTTTCT	lincRNA:chr1:159931073-159946740_F	lincRNA:chr1:159931073-159946740_F	lincRNA:chr1:159931073-159946740 forward strand
A_19_P00321010	na	na	na	na	0.00251916	up	3.19	na	na	na	na	na	9		TAAAAGGCCAAACCTTTGCTCCAACTTTCTCCTTAGCTTCCCTTTGGATCTGGAAAGCTG	lincRNA:chr1:159931073-159946740_F	lincRNA:chr1:159931073-159946740_F	lincRNA:chr1:159931073-159946740 forward strand
A_19_P00321053	na	na	na	na	0.0332236	down	-8.88	na	na	na	na	na	9		GGAGATTGAAAAAAGAAGACCTGATTTATCATGTGCAATATCTCACACATCTGTCATTTC	lincRNA:chr5:27472390-27494425_F	lincRNA:chr5:27472390-27494425_F	lincRNA:chr5:27472390-27494425 forward strand
A_19_P00321073	0.0371	up	3.55	na	na	na	na	na	na	na	na	na	9		ACATGAACCAACATACTTGCTCCATTAATTCCTTTTGCTTTACCATCTTGCTTCAGGTTT	lincRNA:chr11:129103672-129153059_R	lincRNA:chr11:129103672-129153059_R	lincRNA:chr11:129103672-129153059 reverse strand
A_19_P00321089	na	na	na	na	0.00221443	up	2.43	na	na	na	na	na	9		GTTTTATTTCTTATAACTGTACAGGAATCTACAATGATTGTAACAAAAATTTCAATTAAG	lincRNA:chr9:132267249-132269222_F	lincRNA:chr9:132267249-132269222_F	lincRNA:chr9:132267249-132269222 forward strand
A_19_P00321104	0.0248	down	-1.81	na	na	na	na	na	na	na	na	na	9		GGGTGAGACAGTGGTTTGGTGGTTATGTTTGGTTACTTTAGTTATGTTAGTAACATTTTT	lincRNA:chr5:44828220-44828690_F	lincRNA:chr5:44828220-44828690_F	lincRNA:chr5:44828220-44828690 forward strand
A_19_P00321136	na	na	na	na	na	na	na	na	0.0496	up	1.26	na	9		TCTAGGGTCCTTCATATTGCTTACGTTCCTTTAGACTAGAGCCAAGGAGACAGTGCTTTC	lincRNA:chr3:185000753-185010798_F	lincRNA:chr3:185000753-185010798_F	lincRNA:chr3:185000753-185010798 forward strand
A_19_P00321151	na	na	na	na	na	na	na	na	0.0436	down	-2.46	na	9		GCTGGCCTGGGTGCTGGAATATGGAAATGAGGAAGATCCTGCCTGAGGATTTCATGACAG	lincRNA:chr8:125860978-125862459_F	lincRNA:chr8:125860978-125862459_F	lincRNA:chr8:125860978-125862459 forward strand
A_19_P00321183	0.00629	up	2.66	na	na	na	na	na	na	na	na	na	9		TGCCACACCCTTCTAGGCATCCAAATTCAAGCATTTACAATGTACTTCATGAAGCAGTAC	lincRNA:chr1:113510889-113511596_F	lincRNA:chr1:113510889-113511596_F	lincRNA:chr1:113510889-113511596 forward strand
A_19_P00321236	na	na	na	na	na	na	na	na	0.00682	down	-2.48	na	9		AAGTGAGCAGGAAGTGAAGGTCTGTTCCCACCTGTGCCTGTGTTCCCAGATAGCAGCTGC	hg18:lincRNA:chr3:196923287-196924417_F	hg18:lincRNA:chr3:196923287-196924417_F	hg18:lincRNA:chr3:196923287-196924417 forward strand
A_19_P00321243	na	na	na	na	0.0344038	down	-1.32	na	na	na	na	na	9		CCATATGCTGGCAAGGAAGATGGTCAGTTCTTCTGAGCCACAAAGGCCCCCAACATCCTG	lincRNA:chr15:25296235-25301712_F	lincRNA:chr15:25296235-25301712_F	lincRNA:chr15:25296235-25301712 forward strand
A_19_P00321253	na	na	na	na	0.0342899	down	-1.41	na	0.0139	up	1.8	na	6		ACTCCTCTGACCTGAACTGCTTCCGAGTTTGCTTCTCAGAACCAAGAGGGGCTGGCTCTG	lincRNA:chr9:138999696-139000927_R	lincRNA:chr9:138999696-139000927_R	lincRNA:chr9:138999696-139000927 reverse strand
A_19_P00321259	0.0158	up	1.15	na	0.00104288	up	3.5	na	0.00155	up	1.41	na	3		AAATATAGACAGAGTAGTCCCTGGCTTTCTCCTCTTGCAGGAAGGATGGATTCTCCCATT	lincRNA:chr1:159946728-159948849_F	lincRNA:chr1:159946728-159948849_F	lincRNA:chr1:159946728-159948849 forward strand
A_19_P00321263	na	na	na	na	0.0123731	up	2.62	na	na	na	na	na	9		TTGTGAGGAGATTTCATGACAGATGGCAGGAAGCTTCGTGGAGAGATTTCTGAAGACACT	lincRNA:chr4:68586523-68587641_F	lincRNA:chr4:68586523-68587641_F	lincRNA:chr4:68586523-68587641 forward strand
A_19_P00321264	na	na	na	na	na	na	na	na	0.0448	up	2.16	na	9		TCTCATCAGCACATGATTGGTGCAGGGTTCTGAGGATGATTTTGAGATGTTCCCTGATGT	lincRNA:chr4:68586523-68587641_F	lincRNA:chr4:68586523-68587641_F	lincRNA:chr4:68586523-68587641 forward strand
A_19_P00321272	0.0392	up	2.07	na	na	na	na	na	0.00247	up	2.7	na	6		AGCTCGCTGACTGCCTGCACAGTGGAAGGAAGACCTGTTTCTTTTACTTTCCTTGAGGAG	lincRNA:chr21:44890313-44898009_R	lincRNA:chr21:44890313-44898009_R	lincRNA:chr21:44890313-44898009 reverse strand
A_19_P00321303	na	na	na	na	0.0248004	up	2.31	na	0.00849	up	2.38	na	6		CATTGCGGTGATAGGGCCAAGGGCCTGGGCCTTCAATTCTCCAGACTTGCCAAAATGCTC	lincRNA:chr9:132255696-132266160_F	lincRNA:chr9:132255696-132266160_F	lincRNA:chr9:132255696-132266160 forward strand
A_19_P00321306	na	na	na	na	na	na	na	na	0.0294	up	2.75	na	9		GAGAGGTCACCCTTGCAGAGATTGATGTCATCTTCAAGGACTTTGTGAATAAATACACGG	lincRNA:chr17:78302232-78306261_F	lincRNA:chr17:78302232-78306261_F	lincRNA:chr17:78302232-78306261 forward strand
A_19_P00321316	na	na	na	na	0.0365892	up	4.94	na	na	na	na	na	9		TCATCGTCTAGGATGCCAGACAGAAATACCAGTTGCAATGTTTTGTTGCATAAAGTTTAT	lincRNA:chr3:106830493-106959431_R	lincRNA:chr3:106830493-106959431_R	lincRNA:chr3:106830493-106959431 reverse strand
A_19_P00321317	na	na	na	na	na	na	na	na	0.00635	up	2.34	na	9		AGTCTTACGAGAAATGCTATCTTGACCTGACCCTTTCTCCAAATAAATTGACAAAATATC	lincRNA:chr3:106830493-106959431_R	lincRNA:chr3:106830493-106959431_R	lincRNA:chr3:106830493-106959431 reverse strand
A_19_P00321332	na	na	na	na	0.00342808	up	3.05	na	0.00142	up	3.01	na	6		GTACTGGTATGTTGCTCTGTATGGTAAGAACTAATTCTGTTACGTCATGTACATAATTAC	lincRNA:chr11:65190268-65193997_F	lincRNA:chr11:65190268-65193997_F	lincRNA:chr11:65190268-65193997 forward strand
A_19_P00321333	na	na	na	na	0.00350066	up	3.26	na	0.00101	up	2.69	na	6		CTGCGTCTATTGAATTGGTAAAGTAATACCAATGGCTTTTTATCATTTCCTTCTTCCCTT	lincRNA:chr11:65190268-65193997_F	lincRNA:chr11:65190268-65193997_F	lincRNA:chr11:65190268-65193997 forward strand
A_19_P00321361	na	na	na	na	na	na	na	na	0.00374	up	2.68	na	9		GCAACTTTCTTCTTTGTGCTCCAGGAACCTACGCACTATATATATAAATAAAGCTTAAGT	lincRNA:chr7:130628924-130629917_R	lincRNA:chr7:130628924-130629917_R	lincRNA:chr7:130628924-130629917 reverse strand
A_19_P00321364	na	na	na	na	0.0266179	up	1.68	na	0.041	up	1.47	na	6		TTCAAAATATCGGAGAATAATTTCTTTCTCGCTGATCGCCTAACTTCTACTGACGAAGCT	lincRNA:chrX:73164176-73219592_F	lincRNA:chrX:73164176-73219592_F	lincRNA:chrX:73164176-73219592 forward strand
A_19_P00321383	0.0127	up	5.89	na	na	na	na	na	na	na	na	na	9		ACCCCTTTGGGATGCTCAGTGGGAGACAGAATCAAGGGCCAATGATCCATGACCTAGTCC	lincRNA:chr7:130612103-130613026_F	lincRNA:chr7:130612103-130613026_F	lincRNA:chr7:130612103-130613026 forward strand
A_19_P00321435	na	na	na	na	na	na	na	na	0.00443	down	-1.86	na	9		TCTGTCCCCTCTGGGGTGGTGCTGGGCAGCTCCTGTTCCAGGGGATGCCCTCCTCATCCC	lincRNA:chr2:129403638-129408192_R	lincRNA:chr2:129403638-129408192_R	lincRNA:chr2:129403638-129408192 reverse strand
A_19_P00321439	na	na	na	na	na	na	na	na	0.00501	up	1.55	na	9		ATAGAACTGTTACACATTTCTGTGCTCCCCTTACTGGTGGCATGAAATAATTCTTTTAAA	lincRNA:chr3:158458205-158460904_F	lincRNA:chr3:158458205-158460904_F	lincRNA:chr3:158458205-158460904 forward strand
A_19_P00321443	na	na	na	na	0.0427748	down	-5.19	na	na	na	na	na	9		GAACTTGAACCAAATTGTGAAGTTCTCTGCAGTGAAATATTAAAGGTACAGATCAAAGCT	lincRNA:chr2:21444046-22193831_F	lincRNA:chr2:21444046-22193831_F	lincRNA:chr2:21444046-22193831 forward strand
A_19_P00321511	0.00331	up	1.71	na	0.0010469	up	3.22	na	0.0411	down	-1.42	na	3		CGAGTAGCCAGTGAAGATAATGAATGTCGAATGTGACTGACTAGCAGCTTCATTTTGAAG	lincRNA:chr6:86386876-86387701_R	lincRNA:chr6:86386876-86387701_R	lincRNA:chr6:86386876-86387701 reverse strand
A_19_P00321546	0.0178	up	1.6	na	0.0321147	up	2.53	na	0.0461	down	-1.7	na	3		ACTGTTGTGTGAAAAGCTGATAAGAAAACCATCCAGAAAAAAGCTCTTCGTTTTACAAAC	lincRNA:chr6:86386825-86387901_R	lincRNA:chr6:86386825-86387901_R	lincRNA:chr6:86386825-86387901 reverse strand
A_19_P00321578	na	na	na	na	na	na	na	na	0.0308	up	2.15	na	9		GCCACTGCCCAAAGGGGCTCTTATCTGAGGAATACTGCTGACTTCGTGTACCTAGTTTTA	lincRNA:chr3:171507069-171528235_R	lincRNA:chr3:171507069-171528235_R	lincRNA:chr3:171507069-171528235 reverse strand
A_19_P00321583	0.0472	down	-6.77	na	na	na	na	na	na	na	na	na	9		GGAATCTGAAGTAAGGTGTACTAAGCTTGTTTATGGGTTAAGTGATATAGCCAAATTCAA	lincRNA:chr4:90602655-90605092_F	lincRNA:chr4:90602655-90605092_F	lincRNA:chr4:90602655-90605092 forward strand
A_19_P00321585	0.0247	down	-9.82	na	na	na	na	na	na	na	na	na	9		CGAGTCTGTTTGACAATATTCTGTCTTCACTGTTGATCACTTCATAATGTGTTGGAATAT	lincRNA:chr4:90602655-90605092_F	lincRNA:chr4:90602655-90605092_F	lincRNA:chr4:90602655-90605092 forward strand
A_19_P00321593	na	na	na	na	na	na	na	na	0.0159	up	2.08	na	9		ACAACCAGGCGAAGCAGGTAGTGGCGCTGAATCGCTCCTGCCGCGGGGTAAGCGCTCCCG	lincRNA:chr4:15669186-15683175_R	lincRNA:chr4:15669186-15683175_R	lincRNA:chr4:15669186-15683175 reverse strand
A_19_P00321594	na	na	na	na	0.0164157	down	-1.4	na	0.00589	up	1.89	na	6		AGAGTCCCAGAGCCATGGGAGCGAAAAGAGACTGCTGCGGATTAAGGAGGCCTTTCGGTT	lincRNA:chr4:15669186-15683175_R	lincRNA:chr4:15669186-15683175_R	lincRNA:chr4:15669186-15683175 reverse strand
A_19_P00321648	na	na	na	na	na	na	na	na	0.0331	up	4.1	na	9		ATTCCTGGCCTTTGCAGTTATTAGGAAATGAGAGGATCTTTTTTCCTTCTACTCTCCCCT	lincRNA:chr3:194014411-194030493_R	lincRNA:chr3:194014411-194030493_R	lincRNA:chr3:194014411-194030493 reverse strand
A_19_P00321656	0.0075	up	8.96	na	na	na	na	na	na	na	na	na	9		GCCAAGACTTTTCAGTAGGAAATGCTTCAAAATACAAAGCAAGAGCTATTTTCAAGAAAG	lincRNA:chr1:85947965-85961941_R	lincRNA:chr1:85947965-85961941_R	lincRNA:chr1:85947965-85961941 reverse strand
A_19_P00321664	na	na	na	na	na	na	na	na	0.0481	up	2.03	na	9		CTGGGCAGAATTTAAGATGGCTCCTCCATGATCTTCACTCTCTGGGTGAAAACTGTCGGT	lincRNA:chr4:6672454-6675524_F	lincRNA:chr4:6672454-6675524_F	lincRNA:chr4:6672454-6675524 forward strand
A_19_P00321670	na	na	na	na	na	na	na	na	0.0042	down	-2.35	na	9		ATGCAGGTATCATTAACAGCCTGGAGCACTGTGGCCTGTCCACTCTCAACCCTCTGCTGC	lincRNA:chr6:43819493-43820070_R	lincRNA:chr6:43819493-43820070_R	lincRNA:chr6:43819493-43820070 reverse strand
A_19_P00321671	0.0163	up	2.66	na	0.0444336	down	-1.97	na	0.0052	down	-2.84	na	3		CAAATTCACATCTTCCCCATGCTTCCAGAGAATGCATATTCTTCCTTTGAAAAAAGAAAA	lincRNA:chr4:90602662-90614309_F	lincRNA:chr4:90602662-90614309_F	lincRNA:chr4:90602662-90614309 forward strand
A_19_P00321697	na	na	na	na	na	na	na	na	0.0265	up	1.77	na	9		GAACCTCTGTGCACACGATGGGCCTGCATCTCTTCCCACTATCTGCTAGGAAACACGAGG	lincRNA:chr21:44882033-44898034_R	lincRNA:chr21:44882033-44898034_R	lincRNA:chr21:44882033-44898034 reverse strand
A_19_P00321795	na	na	na	na	0.0483481	up	1.58	na	na	na	na	na	9		CCTAACCCTTGGGAGAAGGCAAAACACTTGATGAAATCTACATAAAGACTAAAACATTTT	lincRNA:chrX:73164173-73167168_F	lincRNA:chrX:73164173-73167168_F	lincRNA:chrX:73164173-73167168 forward strand
A_19_P00321809	na	na	na	na	na	na	na	na	0.0484	up	2.13	na	9		ACTCAAAGTGAAGATCAAAAGAACCAAATGACAGCAATAGCCAAGTGTAATCATCAGTAA	lincRNA:chr7:30589933-30601268_R	lincRNA:chr7:30589933-30601268_R	lincRNA:chr7:30589933-30601268 reverse strand
A_19_P00321810	0.00375	up	2.05	na	0.0126476	up	3.38	na	na	na	na	na	6		TCCTGGAGACAGATGACAGCTCTCCCTTGGATGGCTTTGCTGGTTCCGCACCAGCCAGCG	lincRNA:chr20:37075562-37079285_F	lincRNA:chr20:37075562-37079285_F	lincRNA:chr20:37075562-37079285 forward strand
A_19_P00321852	na	na	na	na	0.0372267	up	2.9	na	na	na	na	na	9		CTTCTGCAACTTCCAAGCTTCGTCAGTAGAAGTTAGGCGATCAGCGAGAAAGAAATTATT	lincRNA:chrX:73164437-73224386_R	lincRNA:chrX:73164437-73224386_R	lincRNA:chrX:73164437-73224386 reverse strand
A_19_P00321872	0.00501	up	1.58	na	0.00490709	down	-1.48	na	0.021	down	-1.4	na	3		ATTTCTACAAATATTTCGACATCTCCATATACTCACTCCTTTCCCCCCTGAGTGGAGAGA	lincRNA:chr11:13001081-13011095_R	lincRNA:chr11:13001081-13011095_R	lincRNA:chr11:13001081-13011095 reverse strand
A_19_P00321878	na	na	na	na	0.0182963	down	-1.25	na	na	na	na	na	9		AACCCCAAGGGTAGGTACCTATTGTGCGGAGTCTCGGAACGCCTGCCTGGAAGAAGAGTT	lincRNA:chr6:32862510-32868917_F	lincRNA:chr6:32862510-32868917_F	lincRNA:chr6:32862510-32868917 forward strand
A_19_P00321885	na	na	na	na	na	na	na	na	0.00706	up	2.83	na	9		AATCTGAGCAACTTTCTTCTTTGTGCTCCAGGAACCTACGCACTATATATATAAATAAAG	lincRNA:chr7:130628925-130794653_R	lincRNA:chr7:130628925-130794653_R	lincRNA:chr7:130628925-130794653 reverse strand
A_19_P00321886	na	na	na	na	na	na	na	na	0.005	up	3.05	na	9		GCTAAGGTGAAAGCTTCTATGGCCTTAACATTTTCCTCTTGAAGAATGTATTTTCTGTAA	lincRNA:chr7:130628925-130794653_R	lincRNA:chr7:130628925-130794653_R	lincRNA:chr7:130628925-130794653 reverse strand
A_19_P00321897	na	na	na	na	0.0415476	up	1.61	na	na	na	na	na	9		TTTTCAAATAGGAAAGCTGCCAAGTGCTCTGCGATACCTCCAGCAAGCTTATCGGATTGA	lincRNA:chr2:162102827-162107557_F	lincRNA:chr2:162102827-162107557_F	lincRNA:chr2:162102827-162107557 forward strand
A_19_P00321962	na	na	na	na	na	na	na	na	0.0468	down	-3.53	na	9		GGGAAAAGTCTGCAAAGCTAGTTAGGACATTCAGAAATTCATTTCATTTCAATCCTAACT	lincRNA:chr21:18003757-18013002_F	lincRNA:chr21:18003757-18013002_F	lincRNA:chr21:18003757-18013002 forward strand
A_19_P00321977	na	na	na	na	0.0297962	up	2.08	na	0.00723	up	1.59	na	6		TCTCAAGCTTTACCTTCTAACTTCTGCACCACCAGAAATTAAATTGATGGGCTTTTAAAA	lincRNA:chr11:65266958-65268504_R	lincRNA:chr11:65266958-65268504_R	lincRNA:chr11:65266958-65268504 reverse strand
A_19_P00321979	na	na	na	na	0.0133386	up	2	na	0.00433	up	7.12	na	6		TCCTGCCTTCTGGGTTGAGAGATATCGAATGCTGCTTTGCCAAGAGCTGCTTTCTTGAGC	lincRNA:chr15:58538381-58623829_R	lincRNA:chr15:58538381-58623829_R	lincRNA:chr15:58538381-58623829 reverse strand
A_19_P00321990	0.0408	up	1.76	na	na	na	na	na	0.026	down	-1.76	na	6		GATCTGGTCGACCTTAGACATGGCAAGGCGAGAGGTGAGGTCCATCAGGTCGACCTTAGT	lincRNA:chr19:28269395-28283939_R	lincRNA:chr19:28269395-28283939_R	lincRNA:chr19:28269395-28283939 reverse strand
A_19_P00322071	0.0118	up	2.6	na	na	na	na	na	na	na	na	na	9		ATGATGGTCTGAAGGTCATCACAGCCTCTCTTGATGACATCCTTCCTCTTCTGCTCAGCC	lincRNA:chr2:224569543-224588684_R	lincRNA:chr2:224569543-224588684_R	lincRNA:chr2:224569543-224588684 reverse strand
A_19_P00322082	na	na	na	na	na	na	na	na	0.0473	down	-2.32	na	9		CAGGAGGCGCGGAGCCAATCCAGCCGTCCTGCCGCCGTCCGCGCGGGCCGTCCGTCCCTT	lincRNA:chr17:36609933-36614433_F	lincRNA:chr17:36609933-36614433_F	lincRNA:chr17:36609933-36614433 forward strand
A_19_P00322109	na	na	na	na	na	na	na	na	0.00761	up	3.11	na	9		ATAGCCAAGTGTAATCATCAGTAACCCTGTGTTCTATCCACAGGTAAAAAACAATCATCC	lincRNA:chr7:30590171-30601128_R	lincRNA:chr7:30590171-30601128_R	lincRNA:chr7:30590171-30601128 reverse strand
A_19_P00322181	na	na	na	na	na	na	na	na	0.00451	up	3.49	na	9		ACTCGCACTGTCTGACATTTCCATCGATGGCCTGCATGAGGAATGGGCGGTGAGCATCCT	lincRNA:chr9:132265766-132275963_R	lincRNA:chr9:132265766-132275963_R	lincRNA:chr9:132265766-132275963 reverse strand
A_19_P00322184	na	na	na	na	na	na	na	na	0.049	up	1.41	na	9		GAAAGTTCTTTCCCTGAGGACCATCTGGAGTGGACGCGTGCACTACCCCTCTCTGAATAC	lincRNA:chr9:132101071-132104195_F	lincRNA:chr9:132101071-132104195_F	lincRNA:chr9:132101071-132104195 forward strand
A_19_P00322190	na	na	na	na	na	na	na	na	0.011	down	-1.59	na	9		GGCTGGGGGCGCGTGGTGGCCGCGGGAGCCGCTGGATCAGGAACTGCAGCGGGCCCGGGA	lincRNA:chr7:32973452-32982778_R	lincRNA:chr7:32973452-32982778_R	lincRNA:chr7:32973452-32982778 reverse strand
A_19_P00322208	na	na	na	na	na	na	na	na	0.0463	up	1.9	na	9		GCCTTAGGCTATGGCAGAAGTTGGGCGCCTGAAGTACACGTGGAAATATGCCAACTGAAC	lincRNA:chr16:72557192-72698869_R	lincRNA:chr16:72557192-72698869_R	lincRNA:chr16:72557192-72698869 reverse strand
A_19_P00322220	0.000588	up	2.73	na	0.015501	up	2.16	na	na	na	na	na	6		TGTGCCCAGTGGCCCCAGGTGACGTGTCTTCAAGAAGAGGCTGAGCTGCGGTGCTTGTAA	lincRNA:chr20:37055062-37063887_R	lincRNA:chr20:37055062-37063887_R	lincRNA:chr20:37055062-37063887 reverse strand
A_19_P00322255	na	na	na	na	0.0094862	up	1.68	na	na	na	na	na	9		TACATCCCAAACCTGATGCGGGTCTTCTCTGATTCGGCACTCTAAGGAGGACTCAGCCGC	lincRNA:chr8:107282463-107284434_F	lincRNA:chr8:107282463-107284434_F	lincRNA:chr8:107282463-107284434 forward strand
A_19_P00322301	na	na	na	na	na	na	na	na	0.00121	down	-6.18	na	9		AGGAGATAAACTAGTAAATGCCATATTTGGCCCACCAGGCACAAAGAAGGGTTATAATTG	lincRNA:chr6:127170329-127202061_F	lincRNA:chr6:127170329-127202061_F	lincRNA:chr6:127170329-127202061 forward strand
A_19_P00322332	0.000898	up	3.35	na	0.0120315	down	-5.61	na	0.014	up	1.79	na	3		GTCTTAGCCACATCCTCCAGTCCATCTGGACTAGCAATAAAGCTGACATTTTAATCCCTA	lincRNA:chr17:38673277-38683254_F	lincRNA:chr17:38673277-38683254_F	lincRNA:chr17:38673277-38683254 forward strand
A_19_P00322333	0.00136	up	3.18	na	0.033195	down	-4.52	na	na	na	na	na	6		AACTTTTCGATTTTCTCTGTACAATCTTCACTGGTTCCTCTCTGTGAGAGGAGGAGGGAC	lincRNA:chr17:38673277-38683254_F	lincRNA:chr17:38673277-38683254_F	lincRNA:chr17:38673277-38683254 forward strand
A_19_P00322336	na	na	na	na	0.0398072	up	1.61	na	na	na	na	na	9		AAGATGGCGGCGTTTGCACGGAGTGCAATCACTGCGTCCTTACGGGGGTTGCAAGGCGTC	lincRNA:chrX:73164180-73219203_F	lincRNA:chrX:73164180-73219203_F	lincRNA:chrX:73164180-73219203 forward strand
A_19_P00322339	0.00216	up	3.54	na	na	na	na	na	0.00075	down	-8.82	na	6		AGCTCAGAGGAATGAGGACATTCCAACAGGGTATCAGAATTCTCTTTTGTTTATGCTAAT	lincRNA:chr10:6821559-6884863_F	lincRNA:chr10:6821559-6884863_F	lincRNA:chr10:6821559-6884863 forward strand
A_19_P00322359	na	na	na	na	0.0166274	up	2.44	na	na	na	na	na	9		TAAAAGTGTCAGGTTTTAACCAAGCGATTTTCCATTAAATATTCTCCCAGATGTTCTGGA	lincRNA:chr6:86386806-86387736_F	lincRNA:chr6:86386806-86387736_F	lincRNA:chr6:86386806-86387736 forward strand
A_19_P00322371	na	na	na	na	0.0100479	up	2.28	na	0.000386	up	2.61	na	6		GGCAGGAATGAGGGTCCTCTCCATGCAAGGGGGGAAGATAGAAGAACAAAATTTCACCCT	lincRNA:chr9:132251480-132266711_F	lincRNA:chr9:132251480-132266711_F	lincRNA:chr9:132251480-132266711 forward strand
A_19_P00322375	na	na	na	na	0.0439425	down	-4.26	na	na	na	na	na	9		CATAATACATCTATATCACATCCTCCAATCCATTTTTTTAAGTAATAAAGTTGATGTTTG	lincRNA:chr8:128301935-128324351_R	lincRNA:chr8:128301935-128324351_R	lincRNA:chr8:128301935-128324351 reverse strand
A_19_P00322432	na	na	na	na	0.00661246	up	1.35	na	na	na	na	na	9		CAGCTGCATAAAAACCCTCTCCTTATCTCTTTGTCAAGGGGATTTGAGAAATCTTGCTGT	lincRNA:chr2:3579402-3584463_R	lincRNA:chr2:3579402-3584463_R	lincRNA:chr2:3579402-3584463 reverse strand
A_19_P00322452	na	na	na	na	na	na	na	na	0.0498	down	-1.98	na	9		GATCCTGTTGCTTGAGTCCAAAGAGTTTAAAATAGTGTTGGAAACCTCCTAGGGAAAAAA	lincRNA:chr2:70273132-70278439_R	lincRNA:chr2:70273132-70278439_R	lincRNA:chr2:70273132-70278439 reverse strand
A_19_P00322493	na	na	na	na	na	na	na	na	0.0374	up	1.83	na	9		CCGGCCGGGCCCAGCGCTGCAAGCCTCAGGTCTCTCCAGCAGAGCTGCGCCTCTGCTCTC	lincRNA:chr4:15683443-15688225_R	lincRNA:chr4:15683443-15688225_R	lincRNA:chr4:15683443-15688225 reverse strand
A_19_P00322502	0.00964	up	2.06	na	0.0471193	up	1.39	na	na	na	na	na	6		TTGAAACTGAGCTGTTCGAAGGCGGCGTTGTGTGCAATTCGGATTAATGAAGGGGAAGGG	lincRNA:chr6:86387519-86388438_R	lincRNA:chr6:86387519-86388438_R	lincRNA:chr6:86387519-86388438 reverse strand
A_19_P00322544	na	na	na	na	na	na	na	na	0.0445	up	1.46	na	9		ATTTTGGCAAGTCTGGAGAATTGAAGGCCCAGGCCCTTGGCCCTATCACCGCAATGCAGG	lincRNA:chr9:132255818-132266552_R	lincRNA:chr9:132255818-132266552_R	lincRNA:chr9:132255818-132266552 reverse strand
A_19_P00322650	na	na	na	na	na	na	na	na	0.0465	down	-1.73	na	9		TGTCACTGCTCTAGCTCCTGTGGCACTGCACGGACACGTGGTTGCTACAAGTTAGTACGC	lincRNA:chr4:53579065-53580304_R	lincRNA:chr4:53579065-53580304_R	lincRNA:chr4:53579065-53580304 reverse strand
A_19_P00322666	0.0326	up	1.65	na	0.0018352	up	3.05	na	0.0325	down	-1.81	na	3		GTTGTGTGAAAAGCTGATAAGAAAACCATCCAGAAAAAAGCTCTTCGTTTTACAAACATG	lincRNA:chr6:86386802-86388443_R	lincRNA:chr6:86386802-86388443_R	lincRNA:chr6:86386802-86388443 reverse strand
A_19_P00322681	na	na	na	na	0.0216621	down	-3.62	na	na	na	na	na	9		GCCATGCCTGTGTGCGCACTGCTGTTTCTCATTGTTAATATTTTAACTGTTATTAAAAAA	lincRNA:chr8:49464126-49611069_F	lincRNA:chr8:49464126-49611069_F	lincRNA:chr8:49464126-49611069 forward strand
A_19_P00322687	na	na	na	na	na	na	na	na	0.000584	down	-3.39	na	9		AAAGCGCAGGTATGTTCCTAGTCTTGAGCGGGAGAAAATCACCCAGCTCGGAGCACCTGG	lincRNA:chr4:53612025-53617807_R	lincRNA:chr4:53612025-53617807_R	lincRNA:chr4:53612025-53617807 reverse strand
A_19_P00322691	na	na	na	na	0.0398072	down	-3.97	na	na	na	na	na	9		GCTTATTGACATAATACATCTATATCACATCCTCCAATCCATTTTTTTAAGTAATAAAGT	lincRNA:chr8:128301944-128335397_R	lincRNA:chr8:128301944-128335397_R	lincRNA:chr8:128301944-128335397 reverse strand
A_19_P00322702	0.0183	up	1.74	na	0.00431071	up	3.12	na	na	na	na	na	6		GTGCCACGAGGTTTACTTGACTGTTGTGTGAAAAGCTGATAAGAAAACCATCCAGAAAAA	lincRNA:chr6:86386844-86387863_R	lincRNA:chr6:86386844-86387863_R	lincRNA:chr6:86386844-86387863 reverse strand
A_19_P00322711	na	na	na	na	0.0442722	up	1.98	na	na	na	na	na	9		GTGGACATCTGTCTGGAGGAGCAATTTTACTGCGACATTTTAAAGAAACAAATTTAATTG	lincRNA:chr19:28282645-28284306_R	lincRNA:chr19:28282645-28284306_R	lincRNA:chr19:28282645-28284306 reverse strand
A_19_P00322754	0.00492	up	1.62	na	0.00226327	up	3	na	0.03	down	-1.36	na	3		CTGTCTGCCCATTGATAGAGGCCAGATTGTCTTGGAAGTTCCAAAGTTGCAACGATTTCT	lincRNA:chr6:86386853-86387908_R	lincRNA:chr6:86386853-86387908_R	lincRNA:chr6:86386853-86387908 reverse strand
A_19_P00322762	na	na	na	na	na	na	na	na	0.0038	down	-1.77	na	9		CTTGGCTCTTCCTGGTTTTGTATTCTCTTTTGTGATTTTGCCGCATACATGCTTTTGATG	lincRNA:chr19:53158148-53193727_R	lincRNA:chr19:53158148-53193727_R	lincRNA:chr19:53158148-53193727 reverse strand
A_19_P00322767	0.0136	up	8.47	na	na	na	na	na	0.00959	down	-8.93	na	6		GTTATTCTCTCCAGGTCTTGCTTCTTTCTTAACTAAAAGGGGAAGAGCCCCACAGTTATA	lincRNA:chr21:30868400-30872703_R	lincRNA:chr21:30868400-30872703_R	lincRNA:chr21:30868400-30872703 reverse strand
A_19_P00322792	na	na	na	na	na	na	na	na	0.0371	up	2.01	na	9		ATCTTGTGGCCAAGAGTTCAGACCGTGGCGAAGTGGAGAGTGACATGCAGTTGGATGGCG	lincRNA:chrX:62648803-62780941_R	lincRNA:chrX:62648803-62780941_R	lincRNA:chrX:62648803-62780941 reverse strand
A_19_P00322793	na	na	na	na	0.0158275	up	2.39	na	0.00204	up	2.42	na	6		ATTCTCCAGACTTGCCAAAATGCTCAGCGCAGGCCTCGTCGGCAACTGCAGACAAGCAGA	lincRNA:chr9:132251378-132266150_F	lincRNA:chr9:132251378-132266150_F	lincRNA:chr9:132251378-132266150 forward strand
A_19_P00322804	na	na	na	na	0.00657037	down	-1.5	na	na	na	na	na	9		TCCTTTAAGAGCAGGAGTGATAGGGTGTGGGGGAGTGCCTTAGAGGGGTCTTGCCCTCAT	lincRNA:chr19:28284931-28287332_F	lincRNA:chr19:28284931-28287332_F	lincRNA:chr19:28284931-28287332 forward strand
A_19_P00322813	na	na	na	na	na	na	na	na	0.0387	down	-1.67	na	9		TCCCTGGAAAGTCCCCTCCATCACACACCTGCAGTTTTTCCATTTGAGTGTAATTCTGTT	lincRNA:chr9:16042793-16061273_F	lincRNA:chr9:16042793-16061273_F	lincRNA:chr9:16042793-16061273 forward strand
A_19_P00322856	na	na	na	na	na	na	na	na	0.000396	up	1.95	na	9		ACAAGTCAACAGTCTAGCAGATCAGCCAGTCTCTTTCATCATCAAGCAGACATACTCAAG	lincRNA:chr4:15687889-15690522_F	lincRNA:chr4:15687889-15690522_F	lincRNA:chr4:15687889-15690522 forward strand
A_19_P00322866	na	na	na	na	0.0487133	up	2.08	na	na	na	na	na	9		AGATTAAGTCAAAGGCATCTACCAGGTCCTGAATTCTCTCCCAGATGCACACCTTTTAAG	lincRNA:chr4:15683447-15688768_F	lincRNA:chr4:15683447-15688768_F	lincRNA:chr4:15683447-15688768 forward strand
A_19_P00322873	na	na	na	na	na	na	na	na	0.0152	down	-1.42	na	9		GCTTGGAAAATGAGCTGTGTCAGCCCTCCCAAAGACAACCTCCTTGCAACAGGAAGTTGT	lincRNA:chr4:84717604-85205475_R	lincRNA:chr4:84717604-85205475_R	lincRNA:chr4:84717604-85205475 reverse strand
A_19_P00322878	na	na	na	na	na	na	na	na	0.0283	down	-2.64	na	9		CTGGATGGTTTTCTTATCAGCTTTTCACACAACAGTCAAGTAAACCTCGTGGCACTAGCC	lincRNA:chr6:86386813-86387908_F	lincRNA:chr6:86386813-86387908_F	lincRNA:chr6:86386813-86387908 forward strand
A_19_P00322893	na	na	na	na	na	na	na	na	0.0351	down	-1.33	na	9		GAATCTGATGCAAAGGACAACACACCCTAGAGATTGTAACAGTGAGATGAACCAAGTGAT	lincRNA:chr19:57816389-57819926_F	lincRNA:chr19:57816389-57819926_F	lincRNA:chr19:57816389-57819926 forward strand
A_19_P00322910	na	na	na	na	0.027391	down	-1.52	na	0.0296	down	-1.28	na	6		AACCTTCACCAAGGTCTTGGAACATGAAGCAGAGACTCTGGTGCTGACTCTATCATTTGA	lincRNA:chr2:239795418-239795891_F	lincRNA:chr2:239795418-239795891_F	lincRNA:chr2:239795418-239795891 forward strand
A_19_P00322915	na	na	na	na	na	na	na	na	0.0419	down	-1.55	na	9		CGCTAAGAACTGAGGCAGCTGCACTTCCGCAGACGTAAGAGACGAACTCCTGGAGCTCAA	lincRNA:chr4:53578995-53580281_R	lincRNA:chr4:53578995-53580281_R	lincRNA:chr4:53578995-53580281 reverse strand
A_19_P00322929	na	na	na	na	0.0151307	up	3.24	na	0.00123	up	2.44	na	6		TAGTTTAAGGAAATATCTGACGCTGATAACCATGTCCCAAGCACTGCTCTAAGTTCCCAA	lincRNA:chr4:6657715-6675623_R	lincRNA:chr4:6657715-6675623_R	lincRNA:chr4:6657715-6675623 reverse strand
A_19_P00322930	na	na	na	na	0.0147866	up	1.9	na	0.0438	up	2.38	na	6		GTTGATTCTAGGGTCAGGGCCCTCACTCACACTGCTGGAAGGTTAAAGTCGACTTCACGC	lincRNA:chr4:6657715-6675623_R	lincRNA:chr4:6657715-6675623_R	lincRNA:chr4:6657715-6675623 reverse strand
A_19_P00322932	0.0376	up	1.27	na	0.04802	up	2.61	na	0.00681	up	1.9	na	3		GAGCTTTCCAGCCTGTGCTAAGAAAACTGCCCCACATCATCTGCAGTAGGACGGGGGAGT	lincRNA:chr9:132251329-132265784_F	lincRNA:chr9:132251329-132265784_F	lincRNA:chr9:132251329-132265784 forward strand
A_19_P00322933	na	na	na	na	0.0277447	up	3.1	na	0.00456	up	2.31	na	6		CCCCCAGGATACAGGGTCAAAGGAGAGCACAACCATCGCAGTTGGAAGCCCATGGGGCAG	lincRNA:chr9:132251329-132265784_F	lincRNA:chr9:132251329-132265784_F	lincRNA:chr9:132251329-132265784 forward strand
A_19_P00322934	na	na	na	na	0.0126887	up	2.58	na	0.00275	up	2.36	na	6		GGTGTCTTGATTTCAAGCCCAGTGCAGATGCATCTGACTTACGAAACTTCAGTGACACCT	lincRNA:chr9:132253097-132255874_F	lincRNA:chr9:132253097-132255874_F	lincRNA:chr9:132253097-132255874 forward strand
A_19_P00322938	na	na	na	na	na	na	na	na	0.00504	up	2.55	na	9		GGTGTCTGTCCTCCTTACAGAATGCCTGAACAGTTCCATTGACTCAAAGTGAAGATCAAA	lincRNA:chr7:30563982-30601116_R	lincRNA:chr7:30563982-30601116_R	lincRNA:chr7:30563982-30601116 reverse strand
A_19_P00322944	0.00592	up	1.71	na	0.000300403	up	3.26	na	0.0467	down	-1.41	na	3		ACGAGTAGCCAGTGAAGATAATGAATGTCGAATGTGACTGACTAGCAGCTTCATTTTGAA	lincRNA:chr6:86386831-86387899_R	lincRNA:chr6:86386831-86387899_R	lincRNA:chr6:86386831-86387899 reverse strand
A_19_P00322948	na	na	na	na	0.00808914	down	-1.81	na	na	na	na	na	9		TTTCCAAAAACTTGTAGAAGGTTGTGAAAAAACTACTAGGATCACGCGGCATGTATTGAG	lincRNA:chr8:67834282-67837831_R	lincRNA:chr8:67834282-67837831_R	lincRNA:chr8:67834282-67837831 reverse strand
A_19_P00322961	na	na	na	na	na	na	na	na	0.0157	down	-2.04	na	9		ATTGTCTTTGCCCCCTGCTCAAAATAAAACTGTTACCTTTCAAGCCCTGTCTGCCATGGT	lincRNA:chr3:183171434-183173226_F	lincRNA:chr3:183171434-183173226_F	lincRNA:chr3:183171434-183173226 forward strand
A_19_P00322967	0.000263	up	2.78	na	0.0124415	up	2.32	na	na	na	na	na	6		GTGCCCAGTGGCCCCAGGTGACGTGTCTTCAAGAAGAGGCTGAGCTGCGGTGCTTGTAAG	lincRNA:chr20:37050934-37057222_R	lincRNA:chr20:37050934-37057222_R	lincRNA:chr20:37050934-37057222 reverse strand
A_19_P00322968	na	na	na	na	0.0349351	up	2.26	na	0.00718	up	2.9	na	6		ATGCAGGCCATCGATGGAAATGTCAGACAGTGCGAGTCCACGCCTGAACACTTCTGGGGT	lincRNA:chr9:132264675-132275963_F	lincRNA:chr9:132264675-132275963_F	lincRNA:chr9:132264675-132275963 forward strand
A_19_P00322977	na	na	na	na	na	na	na	na	0.00994	up	2.6	na	9		ATGCTTTTACGAGTTAGAAGAGTTGGGATAATTTGCCATCTGGAGTTTCTCTGCCTTGCT	lincRNA:chr7:130596865-130737318_R	lincRNA:chr7:130596865-130737318_R	lincRNA:chr7:130596865-130737318 reverse strand
A_19_P00322986	0.0317	down	-1.3	na	0.0272174	up	1.24	na	0.00309	up	1.71	na	3		CCATGCTCTGAGACAACTGTGGGTAGGTACATCTCTGTTGGTGGAAATGATGCTTAAGAA	lincRNA:chr14:23769122-23770427_R	lincRNA:chr14:23769122-23770427_R	lincRNA:chr14:23769122-23770427 reverse strand
A_19_P00322992	na	na	na	na	0.0229285	up	3.72	na	na	na	na	na	9		ATCTTGTGTGTGGTGGTCTTCTTCAGAGTAGCAGCTGATTCAGAGGGATTCCATAGAACT	lincRNA:chr2:111994580-111996624_R	lincRNA:chr2:111994580-111996624_R	lincRNA:chr2:111994580-111996624 reverse strand
A_19_P00323002	na	na	na	na	na	na	na	na	0.0395	up	1.25	na	9		TACTACTCGTGCCTTAGCGCACCCTTACTTTCCCAGGCCAGAAACGCGAAATGCTGTCGG	lincRNA:chr6:73985181-74019878_R	lincRNA:chr6:73985181-74019878_R	lincRNA:chr6:73985181-74019878 reverse strand
A_19_P00323022	na	na	na	na	0.00946779	up	3.46	na	0.0028	up	2.58	na	6		ATTACAATTCTTTTCTGCCGGGTCACACGCTGTCATCCACGTGTTACCTAAGAGAGCTTT	lincRNA:chr9:132251021-132255864_F	lincRNA:chr9:132251021-132255864_F	lincRNA:chr9:132251021-132255864 forward strand
A_19_P00323082	na	na	na	na	na	na	na	na	0.00888	up	4.07	na	9		AGCTAGAGGAACCAGACCTCATCAGCCCAACATCAAAGACACCATCGGAACAGCAGCGCC	lincRNA:chr11:2016408-2017024_R	lincRNA:chr11:2016408-2017024_R	lincRNA:chr11:2016408-2017024 reverse strand
A_19_P00323103	na	na	na	na	0.0130418	down	-2.34	na	0.000956	down	-3.29	na	6		ATAGGCTGATGTATATCAAATACACCATCGGCACTCTGAGTCCTTCCCAGGTTCCCTAAA	lincRNA:chr2:181928255-181943030_F	lincRNA:chr2:181928255-181943030_F	lincRNA:chr2:181928255-181943030 forward strand
A_19_P00323209	na	na	na	na	na	na	na	na	0.0354	down	-1.84	na	9		TCAGCCCCTGCTCTGGTGCTTCAATACTAATGAGAGTTATTGCATATTCATAACCCCAAA	lincRNA:chr5:92762769-92774694_F	lincRNA:chr5:92762769-92774694_F	lincRNA:chr5:92762769-92774694 forward strand
A_19_P00323288	na	na	na	na	na	na	na	na	0.0283	down	-1.85	na	9		GAGAGAGAATGAGACTAGAACCTGGTGGCTGGAGTTTGCAGCTGGGCGGTACAGAATGTT	lincRNA:chr22:28069650-28137825_R	lincRNA:chr22:28069650-28137825_R	lincRNA:chr22:28069650-28137825 reverse strand
A_19_P00323364	na	na	na	na	na	na	na	na	0.00994	up	2.6	na	9		ACTTTTCCTGCGTGCTGGATAGGGAGGCCTGAAACCCAGAATCTACTAGATCTGTGCTCC	lincRNA:chr3:37886971-37901969_R	lincRNA:chr3:37886971-37901969_R	lincRNA:chr3:37886971-37901969 reverse strand
A_19_P00323375	na	na	na	na	na	na	na	na	0.0374	up	1.61	na	9		CCATGTTGATTATATGCACTTGGAATATTTCTTTTCCATCTGTGGATTGTTCTGTCACTT	lincRNA:chr22:28316350-28322975_F	lincRNA:chr22:28316350-28322975_F	lincRNA:chr22:28316350-28322975 forward strand
A_19_P00323451	na	na	na	na	na	na	na	na	0.0467	down	-1.09	na	9		ATTATTATATTGGCCCTCCTGTGTATGTGTATATAGGCATTGCATACATAGGAGAAGAAT	lincRNA:chr13:63629474-63649324_R	lincRNA:chr13:63629474-63649324_R	lincRNA:chr13:63629474-63649324 reverse strand
A_19_P00323453	na	na	na	na	na	na	na	na	0.00412	up	1.49	na	9		TAAAAACACAAATCTGATTGACAAGTTGCCTGCCTGTCTGTCTTCAGCCAGTCTACCTGC	lincRNA:chr2:113622329-113650829_R	lincRNA:chr2:113622329-113650829_R	lincRNA:chr2:113622329-113650829 reverse strand
A_19_P00323454	na	na	na	na	na	na	na	na	0.00506	up	2.95	na	9		AATGATGGAGGAAAAAACAGTCCCTCTTCCTCAGACAGTGACACCTCAAACTGCTACAGT	lincRNA:chr17:44271698-44280036_F	lincRNA:chr17:44271698-44280036_F	lincRNA:chr17:44271698-44280036 forward strand
A_19_P00323496	na	na	na	na	na	na	na	na	0.0085	down	-1.43	na	9		CTGCTTCCTCCATGCCCCAAAGCGAAAGAAAGAAAGAATTACTTGTTTAAATCTATTTAA	lincRNA:chr8:55350297-55366022_R	lincRNA:chr8:55350297-55366022_R	lincRNA:chr8:55350297-55366022 reverse strand
A_19_P00323742	na	na	na	na	na	na	na	na	0.00661	down	-1.34	na	9		AGTGCCTGTCTTCCAACACGAGGTCATCCTGCAGCAGCATCAGCCCCTGTTCTCTCAGTT	lincRNA:chr4:6557749-6568099_F	lincRNA:chr4:6557749-6568099_F	lincRNA:chr4:6557749-6568099 forward strand
A_19_P00323801	na	na	na	na	na	na	na	na	0.0267	down	-1.57	na	9		TTTGACTGAATAATTAGAATGTCTTCTGCCTCGCCGCCTGAAGCCCACCATCCCAGCCTC	lincRNA:chr6:44006347-44033347_F	lincRNA:chr6:44006347-44033347_F	lincRNA:chr6:44006347-44033347 forward strand
A_19_P00323827	na	na	na	na	0.0231523	down	-3.08	na	na	na	na	na	9		CTGAGTTTTCTAAAAGGTGTAGTGGAGAGGGCCTAATGAAAGGGAAAACAGGGAGGATAA	lincRNA:chr2:165509129-165519404_R	lincRNA:chr2:165509129-165519404_R	lincRNA:chr2:165509129-165519404 reverse strand
A_19_P00323895	0.0277	down	-1.52	na	na	na	na	na	na	na	na	na	9		ATAGAGAACCATGAACCCTCTGGACCTTTTCTGCTTTGGTCCTGTGCTTTTAACGTCTCA	lincRNA:chrX:115005722-115029431_R	lincRNA:chrX:115005722-115029431_R	lincRNA:chrX:115005722-115029431 reverse strand
A_19_P00323969	na	na	na	na	na	na	na	na	0.0495	down	-1.61	na	9		TCCTGGCCACCTCTTCCAGGCAGCTCTATCAATCCTAGCAGTGAGGAGTGCAGTTGAAGG	lincRNA:chr6:38124747-38131872_F	lincRNA:chr6:38124747-38131872_F	lincRNA:chr6:38124747-38131872 forward strand
A_19_P00324033	na	na	na	na	na	na	na	na	0.0167	down	-1.58	na	9		TTAAAGCCTACCCCAAGAGCAGCCCCCAGCCATGCCTAGATTAAGATGAGCCAGAGGGCT	lincRNA:chr2:64469571-64523396_F	lincRNA:chr2:64469571-64523396_F	lincRNA:chr2:64469571-64523396 forward strand
A_19_P00324069	na	na	na	na	na	na	na	na	0.0451	down	-2.51	na	9		CCCACTGCCGCCCCTGCCCAAGTCCTGCAGGCAGTCATAGAAGAGTTAACTTTTGTTGGA	lincRNA:chr18:42263052-42278652_F	lincRNA:chr18:42263052-42278652_F	lincRNA:chr18:42263052-42278652 forward strand
A_19_P00324127	na	na	na	na	na	na	na	na	0.0494	down	-1.36	na	9		ATACAAACTATAGAATATAGGCAGCAGGCTCCATTCATTTAAAAACTACTGATACTACAC	lincRNA:chr21:30005579-30019279_F	lincRNA:chr21:30005579-30019279_F	lincRNA:chr21:30005579-30019279 forward strand
A_19_P00324168	na	na	na	na	na	na	na	na	0.0467	down	-2.14	na	9		ATTGAACTGATCTTCTCCTCCCCAAACCTCTCCTTGAGGCTGTTTGTCTCTTTCTGTATT	lincRNA:chr14:69063397-69078272_F	lincRNA:chr14:69063397-69078272_F	lincRNA:chr14:69063397-69078272 forward strand
A_19_P00324196	na	na	na	na	na	na	na	na	0.0365	down	-1.96	na	9		GCAGGAGAATACCCAGCTTCTTAGCCTGACTGTTATTCCTGCCTCCTTCCCTCCAACAAA	lincRNA:chr5:167692897-167704922_R	lincRNA:chr5:167692897-167704922_R	lincRNA:chr5:167692897-167704922 reverse strand
A_19_P00324199	na	na	na	na	0.0481183	down	-1.42	na	na	na	na	na	9		ATCCAGAAAGCAGGGCACAACCAAGAGAGCTAAAGACCCCTGGGTAAAGCCACCTCCTGC	lincRNA:chr4:76462801-76476026_F	lincRNA:chr4:76462801-76476026_F	lincRNA:chr4:76462801-76476026 forward strand
A_19_P00324236	na	na	na	na	na	na	na	na	0.0421	down	-1.67	na	9		GCTTGTTCCACGTGCCCTCCTCCCTTTGTGTTTTGGACTTTTGTTTGCTTGTTTCTAGAG	lincRNA:chr13:101223049-101236424_R	lincRNA:chr13:101223049-101236424_R	lincRNA:chr13:101223049-101236424 reverse strand
A_19_P00324286	0.0488	down	-1.37	na	na	na	na	na	na	na	na	na	9		GAGCACGAATATATATTCCCCTAAAATTATAGCTTAGCATTGTCAATGCTTTAGAGCAGT	lincRNA:chr3:184997356-185017181_F	lincRNA:chr3:184997356-185017181_F	lincRNA:chr3:184997356-185017181 forward strand
A_19_P00324383	na	na	na	na	na	na	na	na	0.0499	down	-1.32	na	9		TGTTTTTCCACATCCCTCCTCCCTTGAAATTTCCTTTCAACTAGAAGAGCACTTCTGTGA	lincRNA:chr5:92762769-92774694_R	lincRNA:chr5:92762769-92774694_R	lincRNA:chr5:92762769-92774694 reverse strand
A_19_P00324420	na	na	na	na	na	na	na	na	0.0318	up	1.86	na	9		TCACACCGGACCATGTCATGTCCTGCTTGTCACGTCCACCGGACCTGGCGTCTTGGCCTT	lincRNA:chr11:2017517-2017651_F	lincRNA:chr11:2017517-2017651_F	lincRNA:chr11:2017517-2017651 forward strand
A_19_P00324468	na	na	na	na	na	na	na	na	0.00277	down	-2.6	na	9		TATTGAGGCAGCTCCAGCCCAGACCAGAAGGAAGCCGACAACATGGGAGTCTGGTTAGCA	lincRNA:chr11:130467065-130478238_R	lincRNA:chr11:130467065-130478238_R	lincRNA:chr11:130467065-130478238 reverse strand
A_19_P00324587	na	na	na	na	0.0274253	down	-2.34	na	na	na	na	na	9		ACTAGATAAATGTTTAGTTACCTGTGAGTTTTCTTTTCCTGCCATTGTCAGAGCTAGGCA	lincRNA:chrX:130825494-130847879_R	lincRNA:chrX:130825494-130847879_R	lincRNA:chrX:130825494-130847879 reverse strand
A_19_P00324666	na	na	na	na	na	na	na	na	0.0232	down	-1.93	na	9		CCTTCTCCCCAGACTCCCTTGTGCTTGTATAGGGCAGGGAGGGGTAAGGAAAACAGATCA	lincRNA:chr2:20070919-20091319_F	lincRNA:chr2:20070919-20091319_F	lincRNA:chr2:20070919-20091319 forward strand
A_19_P00324839	na	na	na	na	0.02616	up	1.62	na	0.0189	up	3.02	na	6		CTGAGAAAACAACACGTATTGTTTTCTCAGGTTTTGCTTTTTGGCCTTTTTCTAGCTTAA	lincRNA:chr11:65266349-65275177_F	lincRNA:chr11:65266349-65275177_F	lincRNA:chr11:65266349-65275177 forward strand
A_19_P00324885	na	na	na	na	na	na	na	na	0.024	down	-3.41	na	9		GCCATCAACTATTAAGGCATGTGAAGTCACCACCCTGACACATAAACTCTGGGATAATTC	lincRNA:chrX:100696094-100725244_F	lincRNA:chrX:100696094-100725244_F	lincRNA:chrX:100696094-100725244 forward strand
A_19_P00325018	na	na	na	na	0.0311012	up	4.7	na	na	na	na	na	9		GGTTGTTCTGGGGCCAGAGTTTACTTAGACTTGAAAGAAATTGAAGTTAATTGAAAAAGA	lincRNA:chr11:18088624-18097674_R	lincRNA:chr11:18088624-18097674_R	lincRNA:chr11:18088624-18097674 reverse strand
A_19_P00325103	na	na	na	na	na	na	na	na	0.0223	down	-1.35	na	9		AACAGTACTCTGTCCCTGCGTGCATGTCTCTCTGTGTGTCTGTCTATAAATATCCTCAGA	lincRNA:chr1:203237902-203248477_R	lincRNA:chr1:203237902-203248477_R	lincRNA:chr1:203237902-203248477 reverse strand
A_19_P00325158	na	na	na	na	na	na	na	na	0.00727	up	2.65	na	9		CTTGGAGTTTTGGGGAGGTGGGAGGTAACAGCACAATATCTTTGAACTATATACATCCTT	lincRNA:chr11:65266349-65275177_F	lincRNA:chr11:65266349-65275177_F	lincRNA:chr11:65266349-65275177 forward strand
A_19_P00325177	na	na	na	na	na	na	na	na	0.0299	down	-1.53	na	9		TGCATCCTCCATCTCCCCCTCTCCTTTGACAAAGCTTTTATACCATGTGTCACCAGGGTA	lincRNA:chr12:2035164-2049639_R	lincRNA:chr12:2035164-2049639_R	lincRNA:chr12:2035164-2049639 reverse strand
A_19_P00325179	na	na	na	na	na	na	na	na	0.0364	down	-2.1	na	9		AGAGTTTCTTGCCCCCCTTCTCCCTACAACATGACTCTTAAATATCTGAGCTCATATGAG	lincRNA:chr1:153768876-153777076_F	lincRNA:chr1:153768876-153777076_F	lincRNA:chr1:153768876-153777076 forward strand
A_19_P00325338	na	na	na	na	0.00214455	down	-1.6	na	na	na	na	na	9		TTGTTTTTTCCTGCTCTCCTCCCAAGTCTGCAGGTACAAACATCAGCAACACAGCTTTAG	lincRNA:chr2:179803305-179829380_R	lincRNA:chr2:179803305-179829380_R	lincRNA:chr2:179803305-179829380 reverse strand
A_19_P00325467	na	na	na	na	na	na	na	na	0.0212	down	-1.51	na	9		CCTCTAATTTGGAGCTCCTTGAGGAAGGGGGTTTTCCCTCTGCTTCTCTCTGCAGGCCTA	lincRNA:chr2:127531580-127547255_R	lincRNA:chr2:127531580-127547255_R	lincRNA:chr2:127531580-127547255 reverse strand
A_19_P00325598	na	na	na	na	na	na	na	na	0.0137	down	-2.17	na	9		ATGCTGCGCCCTCTCCCCCACCTTTGTGCCCACCCTCCTCCTCAAACTCCAGGCCAAGTC	lincRNA:chrX:71300975-71319175_F	lincRNA:chrX:71300975-71319175_F	lincRNA:chrX:71300975-71319175 forward strand
A_19_P00325639	na	na	na	na	na	na	na	na	0.00761	down	-2.67	na	9		GCGCCCCAAAACCCGCAACATTCGCAAAGATAAAACATACCTCACAGGAGTCGACTCCTA	lincRNA:chr1:173831852-173837251_F	lincRNA:chr1:173831852-173837251_F	lincRNA:chr1:173831852-173837251 forward strand
A_19_P00325661	na	na	na	na	na	na	na	na	0.0269	down	-2.28	na	9		AGAAAAATGGAGGCAGGGCAGGGGCTGTGCAGTAGCAGAACTGATTGGCCTGCTTGACCA	lincRNA:chr6:34524172-34539872_F	lincRNA:chr6:34524172-34539872_F	lincRNA:chr6:34524172-34539872 forward strand
A_19_P00325768	0.0199	down	-1.29	na	0.000917795	up	1.36	na	na	na	na	na	6		CATTGTTTGAATCCTGTGGTTTCTTTCAGCCCACTTTTATTGACTTAACCTAGTTAATGT	lincRNA:chr19:24218385-24247285_R	lincRNA:chr19:24218385-24247285_R	lincRNA:chr19:24218385-24247285 reverse strand
A_19_P00325794	na	na	na	na	na	na	na	na	0.0266	down	-1.95	na	9		AGCAAGTGGAGTTTCTGAACTGTGATGGGCTGGAGGAGGCGGTGCTGCATACCTGCATAG	lincRNA:chr1:246934252-246946960_R	lincRNA:chr1:246934252-246946960_R	lincRNA:chr1:246934252-246946960 reverse strand
A_19_P00325903	na	na	na	na	na	na	na	na	0.0255	up	1.85	na	9		TTAGGTAGCTGGATCAGGTTTCCTAGCTGTAGCCAGTTCCTTGTTCACTAACTTGCTTGA	lincRNA:chr3:182651981-182660175_R	lincRNA:chr3:182651981-182660175_R	lincRNA:chr3:182651981-182660175 reverse strand
A_19_P00325993	na	na	na	na	na	na	na	na	0.0245	down	-2.58	na	9		CATGTCTCCACCATAGGCTCTGCACCACCTGCCAAATATGGTCCAAACTCCTGACCTGGC	lincRNA:chr1:94266387-94278537_F	lincRNA:chr1:94266387-94278537_F	lincRNA:chr1:94266387-94278537 forward strand
A_19_P00325995	0.00291	up	3.06	na	na	na	na	na	0.0489	up	1.57	na	6		AAACATGGCAGCCAGCAGACCAGTCTATTTCAGCATAGTCTCTGCTGCAGTATTTAAGAA	lincRNA:chr1:113500002-113519902_F	lincRNA:chr1:113500002-113519902_F	lincRNA:chr1:113500002-113519902 forward strand
A_19_P00326012	na	na	na	na	0.0217874	down	-1.65	na	na	na	na	na	9		AGGAATCCATACTGCTTACAGAGGGAGGGAGGGCAGGCTTTGGCCCCAGCAACTCATCAA	lincRNA:chr7:139115835-139124860_R	lincRNA:chr7:139115835-139124860_R	lincRNA:chr7:139115835-139124860 reverse strand
A_19_P00326342	na	na	na	na	na	na	na	na	0.004	down	-6.91	na	9		TATTAATTTCACCATACCAGACCGCCGCCTATGACTGGGGAATGTTGGTATCTCCTCAAT	lincRNA:chrX:53685100-53710450_F	lincRNA:chrX:53685100-53710450_F	lincRNA:chrX:53685100-53710450 forward strand
A_19_P00326345	0.0478	up	1.37	na	na	na	na	na	na	na	na	na	9		ATCGTCGTCCTCTCCTCCTGTCCCCATTAGGGATGGAAGCATTTTCTTTTGCTAAGAAAA	lincRNA:chr9:23597325-23684450_F	lincRNA:chr9:23597325-23684450_F	lincRNA:chr9:23597325-23684450 forward strand
A_19_P00326388	na	na	na	na	na	na	na	na	0.00467	down	-1.94	na	9		AACCACTTCCCTGCCCTCTGCCCTAGAAGTCGTTTGTTTTTAGACACAGCGTTTATGTCC	lincRNA:chr22:28069650-28137825_R	lincRNA:chr22:28069650-28137825_R	lincRNA:chr22:28069650-28137825 reverse strand
A_19_P00326458	na	na	na	na	0.0203736	up	1.72	na	0.00888	down	-2.01	na	6		CTATTTGAGGAAATATCTTTGCCCTCTCCCCACATACATGCAAAACCACTTTTTAGCACT	lincRNA:chr13:48450924-48481320_F	lincRNA:chr13:48450924-48481320_F	lincRNA:chr13:48450924-48481320 forward strand
A_19_P00326467	na	na	na	na	na	na	na	na	0.0418	down	-2.55	na	9		CGGCCAGTCACCAGGCGCGTGCGGAGGCGGCGAGCCTGCGAGGGCGGCCGGTGCGGGCGC	lincRNA:chrX:71228400-71248600_F	lincRNA:chrX:71228400-71248600_F	lincRNA:chrX:71228400-71248600 forward strand
A_19_P00326514	na	na	na	na	0.0414912	up	1.7	na	na	na	na	na	9		CCCAGCTTCAAGGTGGCTGTGCTCTGTTGTGAAAGATGTCTGATCTTTCCCGCCAAAAAA	lincRNA:chr2:20783219-20795366_R	lincRNA:chr2:20783219-20795366_R	lincRNA:chr2:20783219-20795366 reverse strand
A_19_P00326556	0.0408	down	-1.87	na	0.049477	down	-1.56	na	na	na	na	na	6		AACTTCCACATAAACAATTTGAAACTGTATGCCAATCTCCCCACTCTCCAAAAGAAAAAA	lincRNA:chr5:44826668-44836868_R	lincRNA:chr5:44826668-44836868_R	lincRNA:chr5:44826668-44836868 reverse strand
A_19_P00326687	na	na	na	na	0.0174099	up	1.28	na	0.0168	down	-1.57	na	6		AATCATCTTTGTCCCCAGCATCTTGGCACCATCGAGACTAATAATGAGAAGCAACTCCAG	lincRNA:chr10:47092419-47149419_R	lincRNA:chr10:47092419-47149419_R	lincRNA:chr10:47092419-47149419 reverse strand
A_19_P00326732	0.00893	up	2.33	na	0.049456	up	1.62	na	na	na	na	na	6		GGTCTGCTATGATGCATTGCCATCTTGCTGCTTGACAATAGGTTTATAAATAATTAGAAT	lincRNA:chr6:11118364-11146189_F	lincRNA:chr6:11118364-11146189_F	lincRNA:chr6:11118364-11146189 forward strand
A_19_P00326737	na	na	na	na	na	na	na	na	0.0286	down	-1.73	na	9		AAGTTTCTCAATTGGTGTCCACCCAGCTCTGCCTGTGTTCTTCCTGTTGCCTGGTGTTCC	lincRNA:chr6:42725472-42759772_R	lincRNA:chr6:42725472-42759772_R	lincRNA:chr6:42725472-42759772 reverse strand
A_19_P00326765	na	na	na	na	na	na	na	na	0.0327	down	-2.49	na	9		TTCTCTTTTCAATGCTGCTGCTGCTATTTTTCTACTAAGGCAGCTCGGTGTAGCTTTTTT	lincRNA:chr5:141839041-141871766_R	lincRNA:chr5:141839041-141871766_R	lincRNA:chr5:141839041-141871766 reverse strand
A_19_P00326821	0.0485	down	-1.28	na	0.0323344	down	-2	na	na	na	na	na	6		TTGTTGTTTTCTCTTCCCTACCTCGTATGTACTCCCACTCAGGAAAAGATCCTGAGACCT	lincRNA:chr6:42725472-42759772_F	lincRNA:chr6:42725472-42759772_F	lincRNA:chr6:42725472-42759772 forward strand
A_19_P00326822	na	na	na	na	na	na	na	na	0.0157	down	-2.27	na	9		TTTATTCCAGCTTCCAGAATTCCTCCTCTTCAGCCTTGCCTGCTCACTGGAATAATGAAG	lincRNA:chr2:181928255-181943030_F	lincRNA:chr2:181928255-181943030_F	lincRNA:chr2:181928255-181943030 forward strand
A_19_P00326917	na	na	na	na	na	na	na	na	0.00761	down	-1.77	na	9		CCTTTAGCTTTAATGAGCAGACATGAGAATGGTTTATGATCTTAAGTTGGTAACATAGGA	lincRNA:chr4:128758375-128769050_F	lincRNA:chr4:128758375-128769050_F	lincRNA:chr4:128758375-128769050 forward strand
A_19_P00326949	na	na	na	na	na	na	na	na	0.0434	down	-2	na	9		TGTTTGCAGTGGTGGGAAAAGGCTGGCGGTGGTAGGGGGCATCCTTGCACCATTTTGGTT	lincRNA:chr2:238532786-238566833_F	lincRNA:chr2:238532786-238566833_F	lincRNA:chr2:238532786-238566833 forward strand
A_19_P00327072	na	na	na	na	na	na	na	na	0.0279	down	-2.58	na	9		TAAGTGCCTGTCCAGGTGTGTGCAGTTGAGTGCATTAGGGGTGAATGGCTTGGGGCCTTG	lincRNA:chr1:153768876-153777076_R	lincRNA:chr1:153768876-153777076_R	lincRNA:chr1:153768876-153777076 reverse strand
A_19_P00327098	na	na	na	na	0.015603	up	1.83	na	na	na	na	na	9		TTGTGCAGGGCAGGCCTTACCTCCTTCTCACCCCAACTGAGGGAGGGTTGACTGTTTCTA	lincRNA:chr3:52336860-52345160_F	lincRNA:chr3:52336860-52345160_F	lincRNA:chr3:52336860-52345160 forward strand
A_19_P00327354	na	na	na	na	0.0058809	up	2.79	na	0.0196	up	1.78	na	6		GAAAAACAAAGCCCAGCAGGTACGATGGTGATTATTATTGTTACTGGTGGCGCTCTATTA	lincRNA:chr9:132247654-132267729_F	lincRNA:chr9:132247654-132267729_F	lincRNA:chr9:132247654-132267729 forward strand
A_19_P00327603	na	na	na	na	na	na	na	na	0.0127	down	-1.94	na	9		ACAACACAAATGCACACAGCGATGCCTCCCTTTCTTGGATGACTCTTTTATATCATGTTC	lincRNA:chr1:235109502-235120077_F	lincRNA:chr1:235109502-235120077_F	lincRNA:chr1:235109502-235120077 forward strand
A_19_P00327644	na	na	na	na	na	na	na	na	0.0156	down	-3.09	na	9		GGGTTCCATATTTTCCTTATTCCTTCCATGTCTAGCTGTATTGCAGTTAAGTTTATGATT	lincRNA:chrX:100696094-100725244_R	lincRNA:chrX:100696094-100725244_R	lincRNA:chrX:100696094-100725244 reverse strand
A_19_P00327669	na	na	na	na	na	na	na	na	0.0133	down	-1.77	na	9		AGAGTAAGACTCATGAGAATCTCCACATGAAGGCCCCTCCCCTGGGATCACTGTGTTTAA	lincRNA:chr11:94610102-94620077_F	lincRNA:chr11:94610102-94620077_F	lincRNA:chr11:94610102-94620077 forward strand
A_19_P00327687	na	na	na	na	na	na	na	na	0.0445	down	-1.84	na	9		TGTGTGATTTGAGGAATCGCAGCCTACTCCCCCACCCCCAACTTGTTCCAAATTAGCCTC	lincRNA:chrX:16499154-16509904_F	lincRNA:chrX:16499154-16509904_F	lincRNA:chrX:16499154-16509904 forward strand
A_19_P00327876	na	na	na	na	na	na	na	na	0.0289	down	-1.84	na	9		GTCCTCAGCCCTAGCCCCGCTGAGAAAAAGCTCAAGCCCTCTTGTTTATCAACTCTCAGA	lincRNA:chr10:33272169-33284942_F	lincRNA:chr10:33272169-33284942_F	lincRNA:chr10:33272169-33284942 forward strand
A_19_P00327941	0.00675	up	2.49	na	0.0463973	up	1.62	na	na	na	na	na	6		CACAGAAGGAGGCGTGGGGAGCTGGCACCATCTACAGGTGAGGTGCAGATAAATTGTGTG	lincRNA:chr14:96517372-96527972_R	lincRNA:chr14:96517372-96527972_R	lincRNA:chr14:96517372-96527972 reverse strand
A_19_P00328003	na	na	na	na	na	na	na	na	0.0201	down	-4.38	na	9		TGTATTGTTGCTGCTGCTGCGGCTGAAATTGTGAGCTTTGCCACCCAGTGCCAGCCTCAC	lincRNA:chr16:1430124-1444892_R	lincRNA:chr16:1430124-1444892_R	lincRNA:chr16:1430124-1444892 reverse strand
A_19_P00328161	na	na	na	na	na	na	na	na	0.0319	down	-2	na	9		GTGGTGGGGGGATGGGGGTGTCTGCCTCTCTTTTCATTTCTCTGTTCTCTGCCTCCATCT	lincRNA:chr6:40304947-40323847_R	lincRNA:chr6:40304947-40323847_R	lincRNA:chr6:40304947-40323847 reverse strand
A_19_P00328237	na	na	na	na	na	na	na	na	0.0159	down	-2.29	na	9		ATACAAGTCCTATTACGTCTTCTCCTGTCCCAAACCTCAATAAAACTTAATGGCTTTCTC	lincRNA:chr1:163281351-163291607_F	lincRNA:chr1:163281351-163291607_F	lincRNA:chr1:163281351-163291607 forward strand
A_19_P00328343	na	na	na	na	na	na	na	na	0.00538	down	-2.63	na	9		TTCCCTCCCCACAGGCTGTGCTGTGGCTGCTGCTCCTTTGTCCCCTCCAGGGCTCTGTAC	lincRNA:chrX:45367106-45385406_R	lincRNA:chrX:45367106-45385406_R	lincRNA:chrX:45367106-45385406 reverse strand
A_19_P00328407	na	na	na	na	na	na	na	na	0.0245	down	-2.07	na	9		TTCACTGTGAGAGGCTAAGGGAGGAGAGGAGGGCTGGCTTCAGACACATTTGTGGGTGCA	lincRNA:chr1:94159362-94171362_R	lincRNA:chr1:94159362-94171362_R	lincRNA:chr1:94159362-94171362 reverse strand
A_19_P00328496	na	na	na	na	0.00639237	up	1.88	na	na	na	na	na	9		TGGGGTGATCAGCCTTCCTGTGATTCTTCGGATCAGCAGAGAGTCTGGGATGCTGAATTC	lincRNA:chr1:59072412-59100337_F	lincRNA:chr1:59072412-59100337_F	lincRNA:chr1:59072412-59100337 forward strand
A_19_P00328518	na	na	na	na	na	na	na	na	0.00639	down	-3.27	na	9		CTCTGGGCCGCCGGTGCCTCCGCGCGGTCACCGCCTCCACCCGCCTGGCCGCTTCCCTCG	lincRNA:chr9:6669900-6683900_F	lincRNA:chr9:6669900-6683900_F	lincRNA:chr9:6669900-6683900 forward strand
A_19_P00328568	na	na	na	na	na	na	na	na	0.0339	down	-1.54	na	9		TCAAACATCTCACAGGGGCAGAGGTGCCAGCTGCCTTCCATATTTCTGGGGCGACAGAAC	lincRNA:chr16:88329099-88340399_R	lincRNA:chr16:88329099-88340399_R	lincRNA:chr16:88329099-88340399 reverse strand
A_19_P00328649	na	na	na	na	na	na	na	na	0.0309	down	-2.65	na	9		GCTAAGCCCCTCCCGCCTGTTTCTCATTTAGAGCAAGCCCCGGCTGCAGCCCAGACATTC	lincRNA:chr14:99491522-99502997_F	lincRNA:chr14:99491522-99502997_F	lincRNA:chr14:99491522-99502997 forward strand
A_19_P00328690	0.0493	down	-1.88	na	na	na	na	na	na	na	na	na	9		ATGGCTACAACTGATCCCCAAATCCTGAGTAAACACCCTTGCTATTTAATAAGCACAAGC	lincRNA:chr8:28912381-28922959_R	lincRNA:chr8:28912381-28922959_R	lincRNA:chr8:28912381-28922959 reverse strand
A_19_P00328745	na	na	na	na	na	na	na	na	0.0253	down	-1.71	na	9		GCATGGCTAGTCAGGTGTCCTTTCTCCACTATGAACCTCCTGAAACTGGACACTTAAATT	lincRNA:chr5:93988844-94003469_R	lincRNA:chr5:93988844-94003469_R	lincRNA:chr5:93988844-94003469 reverse strand
A_19_P00328785	na	na	na	na	na	na	na	na	0.0492	down	-1.88	na	9		GGCGGGCTCGCGGGAGTTTTGCAAACCCCGCCCCCAGCACACGCGCGCACGCGTACACGC	lincRNA:chr1:180915452-180923811_F	lincRNA:chr1:180915452-180923811_F	lincRNA:chr1:180915452-180923811 forward strand
A_19_P00328829	na	na	na	na	na	na	na	na	0.0387	down	-2.47	na	9		CACCAGAGACGTCTGACCAATTTGATTCTTGAAGCCGCCGCTGAAATCTATTTTGATTTT	lincRNA:chr3:44042171-44161821_R	lincRNA:chr3:44042171-44161821_R	lincRNA:chr3:44042171-44161821 reverse strand
A_19_P00328932	0.0232	up	3.82	na	na	na	na	na	0.0337	down	-2.77	na	6		CCGCCAGCTCCACACAGCTACCCGGGAGGCAGCAGCGGAGGAGAGAGAGGCCTGGAACCC	lincRNA:chr2:129195780-129215280_R	lincRNA:chr2:129195780-129215280_R	lincRNA:chr2:129195780-129215280 reverse strand
A_19_P00328996	na	na	na	na	0.0106443	up	2.53	na	na	na	na	na	9		TTGTTATTAGTGTCTGTTGAAAAAGACCCTGAGCTATACCAGCCCTTGGTTCTCCAGCCT	lincRNA:chr9:132247654-132267729_F	lincRNA:chr9:132247654-132267729_F	lincRNA:chr9:132247654-132267729 forward strand
A_19_P00329086	na	na	na	na	na	na	na	na	0.00868	down	-2.04	na	9		ATGGACTTTCCCAGCCTCCTCCAGAGCAGTCCAGGTTTGTGAATCAATGCAGGAGGTGGG	lincRNA:chr6:132452132-132495007_R	lincRNA:chr6:132452132-132495007_R	lincRNA:chr6:132452132-132495007 reverse strand
A_19_P00329102	0.0157	up	1.44	na	na	na	na	na	na	na	na	na	9		TTTTTTCCCTCTCTCTCTCATGCTCCTTCCTGTACACTGCAGTTGCTGTTGTTTTAGATT	lincRNA:chr19:24218385-24247285_F	lincRNA:chr19:24218385-24247285_F	lincRNA:chr19:24218385-24247285 forward strand
A_19_P00329245	na	na	na	na	na	na	na	na	0.000966	down	-2.61	na	9		TTTTAGCTCCTGTCCCTAGCCCTTACTCTCTGTTGGAGCTCCTGGGTGAGGGGCTGAATC	lincRNA:chr5:61931044-61948469_R	lincRNA:chr5:61931044-61948469_R	lincRNA:chr5:61931044-61948469 reverse strand
A_19_P00329313	0.0151	up	14.65	na	na	na	na	na	0.00475	down	-10.75	na	6		TACAAAAGGAATCCACAAAGGTGATGCCCACAATCAAGAAGAAAGGACTGAAGAAGGGGT	lincRNA:chr15:64753847-64771422_R	lincRNA:chr15:64753847-64771422_R	lincRNA:chr15:64753847-64771422 reverse strand
A_19_P00329475	na	na	na	na	na	na	na	na	0.0228	up	2.75	na	9		TTGATTCATCATTTTTGAATGAGGCCTTGTGGGTTTGAGGGCTGGTGAGAAATAGTGCCG	lincRNA:chr1:234848577-234858502_R	lincRNA:chr1:234848577-234858502_R	lincRNA:chr1:234848577-234858502 reverse strand
A_19_P00329664	na	na	na	na	na	na	na	na	0.046	down	-1.6	na	9		GGCAGGGCTGGGCATGTGTCGCAGTTTAATACATGATTATTGGACAAATGAGTGAAAGAT	lincRNA:chr15:79198170-79208745_F	lincRNA:chr15:79198170-79208745_F	lincRNA:chr15:79198170-79208745 forward strand
A_19_P00329685	na	na	na	na	na	na	na	na	0.000759	down	-2.01	na	9		ACTTCATTTACCTTGTCTCAAAGCCTAATCTGCTGGGGCAGCCTTTCCCTGGTCCCGCCT	lincRNA:chr12:5627814-5635389_R	lincRNA:chr12:5627814-5635389_R	lincRNA:chr12:5627814-5635389 reverse strand
A_19_P00329765	na	na	na	na	0.0272225	up	1.72	na	na	na	na	na	9		ATGACAAGGTTTCTCAGAGAATGCGTGAGTAACTGGAATGGCTTTTCCTGATGACCCAGA	lincRNA:chr11:17378149-17406149_F	lincRNA:chr11:17378149-17406149_F	lincRNA:chr11:17378149-17406149 forward strand
A_19_P00329989	na	na	na	na	na	na	na	na	0.0403	down	-1.83	na	9		TCATCCTCCTCCTCCTCACAGTGACTCCTGCTCTAACAGAGGCACAGAGGCGCAGAAAGA	lincRNA:chr2:20783219-20795366_F	lincRNA:chr2:20783219-20795366_F	lincRNA:chr2:20783219-20795366 forward strand
A_19_P00330027	na	na	na	na	na	na	na	na	0.0227	down	-1.6	na	9		TGGAGCGTTCATGTCAGAGACTGCCAGAAAAGCCTTACCGATTTTGCTTTTCGCTATTGA	lincRNA:chr14:39832799-39844599_R	lincRNA:chr14:39832799-39844599_R	lincRNA:chr14:39832799-39844599 reverse strand
A_19_P00330196	na	na	na	na	na	na	na	na	0.00808	down	-3.06	na	9		AGCCCCTCACCGACCCCACTCCATGTGAAACACTTCCTTCCCTCACCTCCAGTGGCTGAA	lincRNA:chr9:133226429-133238279_R	lincRNA:chr9:133226429-133238279_R	lincRNA:chr9:133226429-133238279 reverse strand
A_19_P00330234	na	na	na	na	0.00733561	up	1.38	na	na	na	na	na	9		AGCTTTTTTCCTAGCTCTGAGCCAGAAGCCACCATGGCCCTCAGCATGTCCCCAGTAGCT	lincRNA:chr1:59072412-59100337_F	lincRNA:chr1:59072412-59100337_F	lincRNA:chr1:59072412-59100337 forward strand
A_19_P00330459	na	na	na	na	na	na	na	na	0.0471	down	-2.42	na	9		GTGACTTTAACTTACGACTTCCATTTCCTGCCCTCTCCTTGTGTGGCCTTTCTTCTGACT	lincRNA:chr7:105525814-105538089_R	lincRNA:chr7:105525814-105538089_R	lincRNA:chr7:105525814-105538089 reverse strand
A_19_P00330464	0.00799	down	-1.85	na	na	na	na	na	0.00355	up	1.57	na	6		GGAGATTACCATTCCCAATGCCTGAACTTCCTCCTGCTATTAAGATTGCTAGAGAATTGT	lincRNA:chr12:54356229-54357908_R	lincRNA:chr12:54356229-54357908_R	lincRNA:chr12:54356229-54357908 reverse strand
A_19_P00330604	na	na	na	na	na	na	na	na	0.0221	down	-3.74	na	9		ACCGCCACCCCCCACCATGATGCTGGAAACTTTTCTTTATTGATACAGATGATGAGCAAT	lincRNA:chr6:36084247-36091829_F	lincRNA:chr6:36084247-36091829_F	lincRNA:chr6:36084247-36091829 forward strand
A_19_P00330650	na	na	na	na	na	na	na	na	0.042	down	-2.36	na	9		ATGCTGACAGCAACAACAGCAGCAGCAATTCTGGGGCCAGCAACCCTCCCAGCATCATCA	lincRNA:chr8:142859618-142872442_R	lincRNA:chr8:142859618-142872442_R	lincRNA:chr8:142859618-142872442 reverse strand
A_19_P00330765	na	na	na	na	na	na	na	na	0.024	down	-1.3	na	9		AACTCCATCTTTCTTGGTGCTAGATACTGACATACCTGCTGTGTCCCTGGATAAAGAAGC	lincRNA:chr9:33011575-33024766_F	lincRNA:chr9:33011575-33024766_F	lincRNA:chr9:33011575-33024766 forward strand
A_19_P00330814	0.0168	down	-2.07	na	na	na	na	na	0.0436	up	1.57	na	6		ATACAGGAGTGATTATGCAGTGGGACCCTGCTGCAAACGGGACTTTGCACTCTAAATATA	lincRNA:chr12:54356229-54357908_R	lincRNA:chr12:54356229-54357908_R	lincRNA:chr12:54356229-54357908 reverse strand
A_19_P00330815	na	na	na	na	na	na	na	na	0.0164	down	-1.43	na	9		TAACAGTGTTTATTGATGATGAGTCCAGGGCTCCTGCTGAAGCCCTGGTGGGGAGGGGCA	lincRNA:chr11:2016408-2017024_F	lincRNA:chr11:2016408-2017024_F	lincRNA:chr11:2016408-2017024 forward strand
A_19_P00330817	na	na	na	na	na	na	na	na	0.0486	down	-1.68	na	9		CACCTGTTCCCCTGACCCCACCCTCAGCAGTTTCCTTTCCACCCCCAGGCCCTGTCTCCA	lincRNA:chr1:41238013-41247638_R	lincRNA:chr1:41238013-41247638_R	lincRNA:chr1:41238013-41247638 reverse strand
A_19_P00330911	na	na	na	na	0.00332211	up	5.2	na	0.005	up	2.66	na	6		TACACCCTGGGAGACGGCAAGAGAAACGTTCACTCCGTGCTTTTTCTCTCTTTATTTTTT	lincRNA:chr2:133030255-133039274_F	lincRNA:chr2:133030255-133039274_F	lincRNA:chr2:133030255-133039274 forward strand
A_19_P00331034	na	na	na	na	na	na	na	na	0.0403	down	-1.52	na	9		GCATCTTTATGCTAGTGAACAAAGTAGCAATAAATGTTCATTTTTGGATGGCAGTACACA	lincRNA:chr4:128758375-128769050_F	lincRNA:chr4:128758375-128769050_F	lincRNA:chr4:128758375-128769050 forward strand
A_19_P00331075	na	na	na	na	na	na	na	na	0.0169	down	-1.54	na	9		GCCTATATACCACCATCTTCAGCAAACCCTAAAAAGGCCTTAGAGTAAGCACAAGTATGT	lincRNA:chr3:106619835-106630535_R	lincRNA:chr3:106619835-106630535_R	lincRNA:chr3:106619835-106630535 reverse strand
A_19_P00331109	na	na	na	na	0.0260739	up	1.8	na	na	na	na	na	9		GCCCGTGGACACTTCTGTACAATAAATCTGCTATTATTACTTCTAGAACTACAGTTATAA	lincRNA:chr20:3850525-3857695_F	lincRNA:chr20:3850525-3857695_F	lincRNA:chr20:3850525-3857695 forward strand
A_19_P00331177	na	na	na	na	na	na	na	na	0.0349	down	-1.39	na	9		ATTCTGCATTAACCTGTTCCAGTGAGGCTCTGGTGGCCCCTACAGCCTGGTTCTTGGGCA	lincRNA:chr10:47041819-47063144_R	lincRNA:chr10:47041819-47063144_R	lincRNA:chr10:47041819-47063144 reverse strand
A_19_P00331279	na	na	na	na	na	na	na	na	0.0209	down	-1.97	na	9		ACCAGCAATGCCAGCCCCAACCACAGCACATGGACTAGAACACAACTAACCATGGCATGG	lincRNA:chr8:142859618-142872442_R	lincRNA:chr8:142859618-142872442_R	lincRNA:chr8:142859618-142872442 reverse strand
A_19_P00331357	na	na	na	na	na	na	na	na	0.045	down	-2.15	na	9		TCTGAGGGGCCATTCTCATCTAAGGTGCTGTGGTACATGCCCACTCTGCTGGTTGATGAA	lincRNA:chr1:204525202-204541352_F	lincRNA:chr1:204525202-204541352_F	lincRNA:chr1:204525202-204541352 forward strand
A_19_P00331473	na	na	na	na	na	na	na	na	0.0425	down	-2.57	na	9		CAAATAATTTCTGACTTCCCCCTGATCTCTGGAGCTTTTTTCTATGTTTATAGTCTCACA	lincRNA:chr13:80609649-80617974_F	lincRNA:chr13:80609649-80617974_F	lincRNA:chr13:80609649-80617974 forward strand
A_19_P00331540	na	na	na	na	0.0397873	up	1.32	na	na	na	na	na	9		CTGGTCTTTTTGCTGCAGCTTTAAGCATCCAACCCGGTATTACCAAGATGACTTAGAGTT	lincRNA:chr10:112668410-112678083_F	lincRNA:chr10:112668410-112678083_F	lincRNA:chr10:112668410-112678083 forward strand
A_19_P00331576	na	na	na	na	na	na	na	na	0.0127	down	-1.9	na	9		TTCATGAAAACACAAAGAGGGGAAAGAGGCTGCTGCTGTTCCAGTGGGAAGTTATGTCTA	lincRNA:chr3:114043485-114052926_F	lincRNA:chr3:114043485-114052926_F	lincRNA:chr3:114043485-114052926 forward strand
A_19_P00331621	na	na	na	na	na	na	na	na	0.00943	down	-2.14	na	9		GACGCCCACGTCGCCGCCCCAACTCCCCTTGGCAGCCCCCGGGCGGTGGGGCAGAGCCCT	lincRNA:chr6:138961057-139020207_F	lincRNA:chr6:138961057-139020207_F	lincRNA:chr6:138961057-139020207 forward strand
A_19_P00331726	na	na	na	na	na	na	na	na	0.0304	down	-1.5	na	9		AAACCCGCTACATAGTGGCGCGTCAGCCCTGGGGAAGCAAAGCGCAAAATTGTTACGGTG	lincRNA:chr4:53577368-53616143_R	lincRNA:chr4:53577368-53616143_R	lincRNA:chr4:53577368-53616143 reverse strand
A_19_P00332124	0.0283	down	-1.61	na	na	na	na	na	na	na	na	na	9		GCTCACTCTCTAGCTGGATTCAGGTGGAACGGAGGACCATGAACCTTCTCGACCTTTTCT	lincRNA:chrX:115051022-115069947_F	lincRNA:chrX:115051022-115069947_F	lincRNA:chrX:115051022-115069947 forward strand
A_19_P00332187	na	na	na	na	na	na	na	na	0.0408	down	-2.7	na	9		AGTTTACGCTGGTTTCAAAGAAGTGAGAGCGCCCCGCCGCCATGTCATGGAGGGTCCCGC	lincRNA:chr4:769425-775573_F	lincRNA:chr4:769425-775573_F	lincRNA:chr4:769425-775573 forward strand
A_19_P00332245	0.0349	down	-1.79	na	na	na	na	na	na	na	na	na	9		GCATTTTATTTCCCTGTACCCCACCACCCCAACATGGGGGAGAAAAACACAACAGCAAAC	lincRNA:chr12:54523008-54559358_R	lincRNA:chr12:54523008-54559358_R	lincRNA:chr12:54523008-54559358 reverse strand
A_19_P00332252	na	na	na	na	na	na	na	na	0.0245	down	-1.52	na	9		TCTCCCGCCCCCCGGAGCCGAGCCTCTTCGCGTTCGCACCGTGAAAGGAGGGGAGCGAGG	lincRNA:chr5:72707719-72723794_F	lincRNA:chr5:72707719-72723794_F	lincRNA:chr5:72707719-72723794 forward strand
A_19_P00332270	na	na	na	na	na	na	na	na	0.0383	down	-1.4	na	9		TCCCACCCCCATGCACACAGGCCACAGTCACTGGGTGGTAGAAAATCAGTTTATTCAGAA	lincRNA:chr4:2558327-2611352_F	lincRNA:chr4:2558327-2611352_F	lincRNA:chr4:2558327-2611352 forward strand
A_19_P00332292	na	na	na	na	na	na	na	na	0.015	down	-2.36	na	9		CGCCGGCTGCGCCCGCACCGGCCGCCCTCGCAGGCTCGCCGCCTCCGCACGCGCCTGGTG	lincRNA:chrX:71228400-71248600_R	lincRNA:chrX:71228400-71248600_R	lincRNA:chrX:71228400-71248600 reverse strand
A_19_P00332305	na	na	na	na	na	na	na	na	0.0182	down	-1.67	na	9		TGGTTTCATATCACCTGGTTTTCAGTACTGCTGCTGCTGTGGGTCGGGGGCTTCGGAGTG	lincRNA:chr8:142243843-142266943_R	lincRNA:chr8:142243843-142266943_R	lincRNA:chr8:142243843-142266943 reverse strand
A_19_P00800028	na	na	na	na	na	na	na	na	0.0272	down	-1.93	na	9		TATCATTGTCAATGCTCTTTCTCTCACTCTGTGCCTCCTAAATGCATGGACTGGGCTCTT	lincRNA:chr8:128822268-128941592_R	lincRNA:chr8:128822268-128941592_R	lincRNA:chr8:128822268-128941592 reverse strand
A_19_P00800061	0.00584	down	-2.89	na	na	na	na	na	0.0013	up	2.3	na	6		GAGGTTAGTTATATGACCGTTTCTCTTTAGGGTTTCATTTCTCTAGCGTAATTCTTGTTT	lincRNA:chr1:142840948-142842761_F	lincRNA:chr1:142840948-142842761_F	lincRNA:chr1:142840948-142842761 forward strand
A_19_P00800071	0.00187	up	2.71	na	0.00195909	up	2.02	na	0.00859	down	-1.72	na	3		AAATCACTGGTCTCACTTGTCCTTTGTTTCAGAATCTCTTGGTGGTGTTTGTGGGCACGA	lincRNA:chr20:37037086-37082161_R	lincRNA:chr20:37037086-37082161_R	lincRNA:chr20:37037086-37082161 reverse strand
A_19_P00800209	na	na	na	na	na	na	na	na	0.0312	down	-1.85	na	9		TCAGCTTCCTGGACTTTTTGAGAATGGCTGCCAGAGCTCTAATGAACTCCTGCTGGTTCA	lincRNA:chr5:52531518-52727218_R	lincRNA:chr5:52531518-52727218_R	lincRNA:chr5:52531518-52727218 reverse strand
A_19_P00800241	0.0473	down	-1.45	na	na	na	na	na	0.0159	up	1.38	na	6		AATCATTCCTCAGTTATGGCAAGAATGTGCTATTTTTCACTGTTAGGTGTTGCTTCTGAG	lincRNA:chr18:34366527-34373752_R	lincRNA:chr18:34366527-34373752_R	lincRNA:chr18:34366527-34373752 reverse strand
A_19_P00800282	na	na	na	na	na	na	na	na	0.033	up	2.32	na	9		TTCTATGGTGTATGTGTTCATTAAATTCTGGGTCATTGAACGGTCATGGATAACCTTAAT	lincRNA:chr6:5013951-5056876_F	lincRNA:chr6:5013951-5056876_F	lincRNA:chr6:5013951-5056876 forward strand
A_19_P00800283	na	na	na	na	0.0427741	down	-1.97	na	na	na	na	na	9		TCAGCTTGATGGCATCTGTGAATAAATCAATGGCTTTCTGCAGTTCACCATCATTTAGGG	lincRNA:chr11:94624327-94662577_R	lincRNA:chr11:94624327-94662577_R	lincRNA:chr11:94624327-94662577 reverse strand
A_19_P00800294	na	na	na	na	na	na	na	na	0.0228	down	-2.61	na	9		GAGTTAGCATAGGCAAGGGTCTAGCCCAGTGTCTGTGGGTGTCTGCCTCACTTCCCTTTT	lincRNA:chr6:43988722-43993947_F	lincRNA:chr6:43988722-43993947_F	lincRNA:chr6:43988722-43993947 forward strand
A_19_P00800298	na	na	na	na	na	na	na	na	0.00555	down	-5.27	na	9		TATAGATGTACTGTTCCATCTGGAAGTCAAGATTGGTGCCACCTAAGTGAGTTCCTGCTG	lincRNA:chr2:62367371-62385846_R	lincRNA:chr2:62367371-62385846_R	lincRNA:chr2:62367371-62385846 reverse strand
A_19_P00800300	na	na	na	na	0.0065051	down	-1.89	na	na	na	na	na	9		CAAGAATTTCTCACCACAAGATCTGGATTCAAGTTCTGGGCCTGCCCCTTTAACATCTCT	lincRNA:chr17:56067851-56073317_F	lincRNA:chr17:56067851-56073317_F	lincRNA:chr17:56067851-56073317 forward strand
A_19_P00800337	na	na	na	na	na	na	na	na	0.0476	down	-1.46	na	9		TGGCACTGGCCAACGTCTCTTCTAGGTCATCGGTGGTTTTCTCCAACTTTGCCACAGACC	lincRNA:chr5:163123647-163140922_F	lincRNA:chr5:163123647-163140922_F	lincRNA:chr5:163123647-163140922 forward strand
A_19_P00800370	na	na	na	na	na	na	na	na	0.0198	down	-2.43	na	9		CTAGAGTTGATCAACTCCAGTGACTTTTTCATCTTCTTTGTGGCTACCATCTTCCTGCCT	lincRNA:chr2:9204749-9226049_F	lincRNA:chr2:9204749-9226049_F	lincRNA:chr2:9204749-9226049 forward strand
A_19_P00800396	na	na	na	na	0.0345604	up	2.32	na	na	na	na	na	9		CACCAACACTTTGCAAGCAGCTTTAAAAAGAATTCCTAAAATGTTAAGTGCTTTCTTTCC	lincRNA:chr13:92005489-92006835_R	lincRNA:chr13:92005489-92006835_R	lincRNA:chr13:92005489-92006835 reverse strand
A_19_P00800454	na	na	na	na	na	na	na	na	0.0365	down	-1.81	na	9		TTCAAGGCCTTGGACTGCAAGTCCACTAAGGTGGCTGGTGGTGTGGGTGGAGGTGGAAAA	lincRNA:chr8:128807043-128821043_F	lincRNA:chr8:128807043-128821043_F	lincRNA:chr8:128807043-128821043 forward strand
A_19_P00800467	na	na	na	na	na	na	na	na	0.00664	down	-2.39	na	9		AGCAAAAATGCAAGCAAGTATAGAAAAAGTGGTTCCCTTCCCAAAGTGGAAGCCAAGTTC	lincRNA:chr13:68406007-68406959_R	lincRNA:chr13:68406007-68406959_R	lincRNA:chr13:68406007-68406959 reverse strand
A_19_P00800524	na	na	na	na	na	na	na	na	0.017	down	-1.48	na	9		TGAAATACACGGTAAGTATCCCCCAACCCTCCCTCAAAGGAACCAATTATGAACACTATA	lincRNA:chr1:65519062-65531812_F	lincRNA:chr1:65519062-65531812_F	lincRNA:chr1:65519062-65531812 forward strand
A_19_P00800555	0.0112	up	1.87	na	na	na	na	na	0.00963	down	-1.93	na	6		CATGGCAAGGTGAGAGCCATCTGGTCGACCTTAGATATGGCAAGGTGAGAATCATCTGGT	lincRNA:chr19:28263076-28263382_R	lincRNA:chr19:28263076-28263382_R	lincRNA:chr19:28263076-28263382 reverse strand
A_19_P00800556	na	na	na	na	na	na	na	na	0.0259	down	-2.89	na	9		TATCAGACCTGCCGCTCACCGCACCGAACTGATTCCATGGACACTGACATTTGTCTCTGC	lincRNA:chr7:80367-94117_R	lincRNA:chr7:80367-94117_R	lincRNA:chr7:80367-94117 reverse strand
A_19_P00800566	na	na	na	na	na	na	na	na	0.0364	down	-1.73	na	9		TGACGGATGAACTTCTTGGTTCTCTTTTTGACGATCTTGGACTTCACAAGGGGTCTAAGG	lincRNA:chr8:134331693-134342018_R	lincRNA:chr8:134331693-134342018_R	lincRNA:chr8:134331693-134342018 reverse strand
A_19_P00800635	na	na	na	na	na	na	na	na	0.018	down	-7.87	na	9		AACATCCCTGACTATGTGTGATGGTGTATACTGCCACAGTGTTTGAATCAATCCCCAGAG	lincRNA:chr6:39949522-39974972_F	lincRNA:chr6:39949522-39974972_F	lincRNA:chr6:39949522-39974972 forward strand
A_19_P00800644	na	na	na	na	na	na	na	na	0.0226	down	-2.12	na	9		CAACATTCACACCATATTTTGGCAGTTTGTGCGCATATGCTGCGCAGACTATCATATCCC	lincRNA:chr6:127683868-127683995_R	lincRNA:chr6:127683868-127683995_R	lincRNA:chr6:127683868-127683995 reverse strand
A_19_P00800668	na	na	na	na	na	na	na	na	0.00455	down	-6.29	na	9		AAGGAACTTAAGGACATCCTCCTCATTCATCTGCAGTACATCAAGGGCTCCGAACATTGT	lincRNA:chr6:28695421-28709221_R	lincRNA:chr6:28695421-28709221_R	lincRNA:chr6:28695421-28709221 reverse strand
A_19_P00800682	na	na	na	na	na	na	na	na	0.0261	down	-2.72	na	9		GTTTACTGTTGGATTTCCCTTTCTTGCTATTCTCTTTCTCTCCAGACCCCTCTCAATTGC	lincRNA:chr11:110066015-110071440_R	lincRNA:chr11:110066015-110071440_R	lincRNA:chr11:110066015-110071440 reverse strand
A_19_P00800688	na	na	na	na	na	na	na	na	0.0337	down	-1.48	na	9		ATCAAAATTCTCCACAAGATCTGGAACTTCATTATCATCATCCTCTCCAGTAGCAAGTGG	lincRNA:chr6:6795118-6795287_F	lincRNA:chr6:6795118-6795287_F	lincRNA:chr6:6795118-6795287 forward strand
A_19_P00800959	0.0425	up	2.44	na	na	na	na	na	na	na	na	na	9		AAATTTGTCATCCCAAAGCCAGACCTGCCCAGTGCCATTCCTCGATGTGTTTAGATGATA	lincRNA:chr15:40336258-40358304_R	lincRNA:chr15:40336258-40358304_R	lincRNA:chr15:40336258-40358304 reverse strand
A_19_P00800973	na	na	na	na	na	na	na	na	0.0131	down	-2.08	na	9		TTGAAGCCCACTCCATGGATGGGGCTTGTGAATGTTGTTGGTGTATTCTCGGGTCACCAC	lincRNA:chr10:54147394-54152519_F	lincRNA:chr10:54147394-54152519_F	lincRNA:chr10:54147394-54152519 forward strand
A_19_P00800984	na	na	na	na	na	na	na	na	0.0157	down	-4.29	na	9		TTCGAACTTGGAGACGACTTGAGTGTGTTTTTGACCAAGAGAAACATCGTGAAGGTGAAG	lincRNA:chr22:35574725-35623150_F	lincRNA:chr22:35574725-35623150_F	lincRNA:chr22:35574725-35623150 forward strand
A_19_P00800990	na	na	na	na	na	na	na	na	0.0314	down	-2.06	na	9		GGGGGTTTCTGGCCTTTCGGGGGAAAGTTCAGCGACAATGCAATATTTGGGTCTGTTTTG	lincRNA:chr2:133030255-133039255_R	lincRNA:chr2:133030255-133039255_R	lincRNA:chr2:133030255-133039255 reverse strand
A_19_P00801002	na	na	na	na	0.00957752	down	-2.97	na	na	na	na	na	9		GTTCCGCATTTCTTCCACTTCCTTTCATCCCAAATCCAGGACCTGGTTTTTAAAGGATCA	lincRNA:chr8:8777340-8841140_F	lincRNA:chr8:8777340-8841140_F	lincRNA:chr8:8777340-8841140 forward strand
A_19_P00801088	0.0376	down	-3.07	na	na	na	na	na	0.022	up	2.8	na	6		CCTGGAGCTCTCATTTTCAAGAGATATCCATTTGCTAACTTTATTCAAGAAATGTGACTA	lincRNA:chr1:142840948-142842761_F	lincRNA:chr1:142840948-142842761_F	lincRNA:chr1:142840948-142842761 forward strand
A_19_P00801165	na	na	na	na	0.0264451	down	-1.58	na	0.00296	up	2.22	na	6		CAATTGCATCCGAAAAATCCACAGCCACCATCGTGTCAGCAGCACGTTGACCATGGCTCA	lincRNA:chr9:138999329-139005204_R	lincRNA:chr9:138999329-139005204_R	lincRNA:chr9:138999329-139005204 reverse strand
A_19_P00801344	na	na	na	na	na	na	na	na	0.0225	down	-2.24	na	9		TCACAGTTAAGTGGGCACCGGGTTTTTGAGAATATTCTCTTGAGACCGCTCTCTTTGGTT	lincRNA:chr4:113607651-113872301_F	lincRNA:chr4:113607651-113872301_F	lincRNA:chr4:113607651-113872301 forward strand
A_19_P00801404	na	na	na	na	na	na	na	na	0.0383	down	-1.53	na	9		TTCTCCTCTTTCTGATGATACTGCCAACTTCCTTTCCATGCATAAGTAGCCAGGTGGTGA	lincRNA:chr21:40541155-40546455_F	lincRNA:chr21:40541155-40546455_F	lincRNA:chr21:40541155-40546455 forward strand
A_19_P00801506	na	na	na	na	na	na	na	na	0.0242	down	-1.55	na	9		CTGCTCACATCTGGTCTGTTCCCCAGTATCCTCACTGTATTAAAGTTGTTTCTTTGTCAT	lincRNA:chr13:21906119-21906571_F	lincRNA:chr13:21906119-21906571_F	lincRNA:chr13:21906119-21906571 forward strand
A_19_P00801556	na	na	na	na	na	na	na	na	0.00488	down	-1.75	na	9		AAGCAGATTTTGCCAAGGCCTTCCCCTAAATTTTCTCTTTATCTACTGCCTCTTCTTCAT	lincRNA:chr5:60719293-60801393_R	lincRNA:chr5:60719293-60801393_R	lincRNA:chr5:60719293-60801393 reverse strand
A_19_P00801585	na	na	na	na	na	na	na	na	0.0188	down	-1.84	na	9		ACCTTAGACATGGCAAGGTGAGAGCTGTCTGTTCATCTTAGACATGACAAGCTGGCAGCT	lincRNA:chr19:28263076-28263382_R	lincRNA:chr19:28263076-28263382_R	lincRNA:chr19:28263076-28263382 reverse strand
A_19_P00801627	na	na	na	na	na	na	na	na	0.0302	down	-1.27	na	9		TTTGAAAAATTCCTATTGTGATTTGACTGTTTTTACCCATATCCCCTCCCCCGCTCCAAT	lincRNA:chr15:35473999-35530398_F	lincRNA:chr15:35473999-35530398_F	lincRNA:chr15:35473999-35530398 forward strand
A_19_P00801634	na	na	na	na	na	na	na	na	0.0238	down	-4.82	na	9		TCCAGAGAGGTGTGAGGAGACGAGTGAAAAACCCAAAAAGAAGAAAAAGCAAAAGCCCCA	lincRNA:chr12:79939394-79966869_F	lincRNA:chr12:79939394-79966869_F	lincRNA:chr12:79939394-79966869 forward strand
A_19_P00801649	na	na	na	na	0.0206797	down	-1.61	na	0.0225	up	1.8	na	6		TCTGACGCTGCTGGCAATGTCTGAGCTCTATGCTCGCCCATCTGTCGGCTGCTATCATCA	lincRNA:chr20:61399055-61409155_R	lincRNA:chr20:61399055-61409155_R	lincRNA:chr20:61399055-61409155 reverse strand
A_19_P00801752	0.00242	down	-1.41	na	na	na	na	na	0.00721	up	1.86	na	6		TGTAAACCGCCTGTTGTCTAAACATATATCCGTGTATGTAAACCGCCTGTTGTCTAAACA	lincRNA:chr21:44751672-44819297_R	lincRNA:chr21:44751672-44819297_R	lincRNA:chr21:44751672-44819297 reverse strand
A_19_P00801821	0.0144	up	1.18	na	0.0123731	up	1.39	na	0.000509	down	-1.98	na	3		GTAAAACCCAAAAAGAAGAAAAAGCAAAAGCCCCAGGAGGCTCCTCAGGAGAATGGAATC	lincRNA:chr9:23597225-23684450_F	lincRNA:chr9:23597225-23684450_F	lincRNA:chr9:23597225-23684450 forward strand
A_19_P00801917	na	na	na	na	na	na	na	na	0.000331	down	-4	na	9		AGTACTGGTTGCTAACCCTCCTCCACACTTGGTTTGCAGAGGATATTTCCAGAGTTAGAA	lincRNA:chr6:5892677-5986353_F	lincRNA:chr6:5892677-5986353_F	lincRNA:chr6:5892677-5986353 forward strand
A_19_P00801931	na	na	na	na	na	na	na	na	0.0403	down	-1.57	na	9		AGATTATTCTGACACTTTTTCTCCCCTCTCCCATCCCTCTAGTGAGAATATTTAAAAGAA	lincRNA:chr5:9919325-9933625_R	lincRNA:chr5:9919325-9933625_R	lincRNA:chr5:9919325-9933625 reverse strand
A_19_P00801971	na	na	na	na	0.0474573	up	1.35	na	na	na	na	na	9		TTTTCAAGAAAAGGAGGCATCCCTGGTCCAATGCTGCTGAATGTGTCTCAAGAAGCTACA	lincRNA:chr14:96561398-96561831_F	lincRNA:chr14:96561398-96561831_F	lincRNA:chr14:96561398-96561831 forward strand
A_19_P00801997	na	na	na	na	na	na	na	na	0.0155	down	-1.97	na	9		TAAGTCCTTTACTAAGGAGCTCCTGAAGGGCTGCCCTGGCCAGGGAGCCTCGAATCTTCA	lincRNA:chr11:27603315-27603616_R	lincRNA:chr11:27603315-27603616_R	lincRNA:chr11:27603315-27603616 reverse strand
A_19_P00802027	na	na	na	na	0.00107978	up	1.41	na	0.000509	down	-1.53	na	6		GAAAGACTGAGCCCCCTTCCCCTGCCCTCTCCCTGAAATAAAGAATAGCTTGACAGAAAG	lincRNA:chr9:111293604-111458604_F	lincRNA:chr9:111293604-111458604_F	lincRNA:chr9:111293604-111458604 forward strand
A_19_P00802118	na	na	na	na	na	na	na	na	0.0266	down	-1.36	na	9		GATGTCTTCCAAGTCTATTCTCACCCTACCCCATGCCCTTGGGCTACAGATAACTCTTCA	lincRNA:chr5:52406643-52414293_F	lincRNA:chr5:52406643-52414293_F	lincRNA:chr5:52406643-52414293 forward strand
A_19_P00802172	na	na	na	na	na	na	na	na	0.00536	down	-2.32	na	9		AGCGGGGACTGTGGGGGGCGGACGGACGAAGAGAGTCCAGCTGTTACCTGTGGCTCCTCC	lincRNA:chr8:145986196-145991421_R	lincRNA:chr8:145986196-145991421_R	lincRNA:chr8:145986196-145991421 reverse strand
A_19_P00802201	0.0201	down	-1.5	na	na	na	na	na	na	na	na	na	9		ATTCCTGAAGATCAGCATGATCCCTCAGCTGAACTCAAAAGCCATCAAAGACCTTGCCTT	lincRNA:chr7:7928975-7996750_R	lincRNA:chr7:7928975-7996750_R	lincRNA:chr7:7928975-7996750 reverse strand
A_19_P00802209	na	na	na	na	0.0128573	down	-6.16	na	na	na	na	na	9		GGCTGGCCTTTAATGGAAGGCTTTAATTTAGGGAACTTAAAGAATTTCATAATATTGGAG	lincRNA:chr5:102544301-102549901_F	lincRNA:chr5:102544301-102549901_F	lincRNA:chr5:102544301-102549901 forward strand
A_19_P00802238	0.0196	up	1.91	na	na	na	na	na	na	na	na	na	9		CAGTGGCCATTGTCCTGTGTTAGGAGCAGGTGGTCTCGCTAAGCTCCATGTGTTTGGAAA	lincRNA:chr10:103459185-103464735_R	lincRNA:chr10:103459185-103464735_R	lincRNA:chr10:103459185-103464735 reverse strand
A_19_P00802257	0.021	up	1.63	na	na	na	na	na	0.00075	up	2.6	na	6		CAGGGAGAAGGATGCCCTAAGCCAAAGGAAGTCCTTCCTGGGGTCTAATCTCTACCTTTT	lincRNA:chr1:37917588-37923413_R	lincRNA:chr1:37917588-37923413_R	lincRNA:chr1:37917588-37923413 reverse strand
A_19_P00802276	na	na	na	na	na	na	na	na	0.00218	down	-2.32	na	9		CATTTTGGCTTTTAGGTGTGCTTTTCATGACACCTGTGTTCTGGTGGCAAACCCATTGCT	lincRNA:chrX:97546119-97657219_R	lincRNA:chrX:97546119-97657219_R	lincRNA:chrX:97546119-97657219 reverse strand
A_19_P00802319	na	na	na	na	na	na	na	na	0.0235	down	-1.56	na	9		AAAGTGATCATCTTTGTCGGCCTTTAGTTCACAACCGAAAAGATAGTTCTGGGGCCTCAG	lincRNA:chr2:204620380-204666130_F	lincRNA:chr2:204620380-204666130_F	lincRNA:chr2:204620380-204666130 forward strand
A_19_P00802402	na	na	na	na	0.0238727	up	1.27	na	na	na	na	na	9		ACTTCACCTCCGGTGCACCTCAGGTATACGACTTTGATCTCGTTGGGGTCGAACTTCGGC	lincRNA:chr20:53674743-53740918_R	lincRNA:chr20:53674743-53740918_R	lincRNA:chr20:53674743-53740918 reverse strand
A_19_P00802407	0.00208	up	2.1	na	na	na	na	na	na	na	na	na	9		GATCTCCCCTAAAACTGTATAGTCCTTTCCCTGGTGTTTTTGCTGAGCTATAGAGTCCAG	lincRNA:chr18:43652652-43662027_R	lincRNA:chr18:43652652-43662027_R	lincRNA:chr18:43652652-43662027 reverse strand
A_19_P00802450	na	na	na	na	na	na	na	na	0.0437	up	2.2	na	9		TTGAGCTAAGTCTAAGCAAAAGGGGTGGTCAGGGCAGCAGCTGCTCCAAAACAGGGGCTG	lincRNA:chr9:132236854-132272279_F	lincRNA:chr9:132236854-132272279_F	lincRNA:chr9:132236854-132272279 forward strand
A_19_P00802550	na	na	na	na	na	na	na	na	0.0108	down	-1.9	na	9		GGGCATCAAACTTGTCTACCTCTTGTCTGCCTCACAGGGCCATGGGGAACAGCCAGTGAA	lincRNA:chr12:105804881-105805536_F	lincRNA:chr12:105804881-105805536_F	lincRNA:chr12:105804881-105805536 forward strand
A_19_P00802593	na	na	na	na	na	na	na	na	0.0147	down	-2.18	na	9		CCTAGCCCTAACCCTTGCACACACACACACACAAAATCCTTATCACTAATTTAGTATTGA	lincRNA:chr4:24814752-24827052_F	lincRNA:chr4:24814752-24827052_F	lincRNA:chr4:24814752-24827052 forward strand
A_19_P00802654	na	na	na	na	0.00116547	down	-1.35	na	na	na	na	na	9		GGAAATGTTTGTTTGCATCCTGGCTTTCTCAACCGCACTTTACGTCCTTGAATATTCTAG	lincRNA:chr3:160210781-160217931_R	lincRNA:chr3:160210781-160217931_R	lincRNA:chr3:160210781-160217931 reverse strand
A_19_P00802684	na	na	na	na	na	na	na	na	0.0164	down	-3.94	na	9		CTTTAGAATATGCCACCTTGTCATGTATTCACATATATGTGCTCACATATACACACACAG	lincRNA:chr2:42070496-42083971_R	lincRNA:chr2:42070496-42083971_R	lincRNA:chr2:42070496-42083971 reverse strand
A_19_P00802713	na	na	na	na	na	na	na	na	0.0374	up	2	na	9		ATTGTGCTGCATTCGAACATAGGTTCTGCCATCAAACACAGAATGCCCTGATCCTTAGAG	lincRNA:chr7:66321690-66340815_F	lincRNA:chr7:66321690-66340815_F	lincRNA:chr7:66321690-66340815 forward strand
A_19_P00802810	na	na	na	na	na	na	na	na	0.0282	down	-2.18	na	9		AAATGCTGAGGATTAAAGCTGAGTATGAAGGGGTGGCAGTCGTACTGTATTTGTGGCAGT	lincRNA:chr9:37876125-37881925_F	lincRNA:chr9:37876125-37881925_F	lincRNA:chr9:37876125-37881925 forward strand
A_19_P00802884	0.00952	down	-1.57	na	na	na	na	na	na	na	na	na	9		ATGCTGTCCTCGCTCTTGTGTCCCTCCACGGGACAGACATCACCTTGCAAGACAACTCGT	lincRNA:chr8:107284490-107284921_R	lincRNA:chr8:107284490-107284921_R	lincRNA:chr8:107284490-107284921 reverse strand
A_19_P00802936	0.00941	down	-1.21	na	0.000625342	down	-1.46	na	0.0148	up	1.12	na	3		GACATTTTCAGACTTTTCTTTCTGTCACTTGGAGTGTCTATGCCTCTCATGTTTCCCTAA	lincRNA:chr21:25797459-25797564_F	lincRNA:chr21:25797459-25797564_F	lincRNA:chr21:25797459-25797564 forward strand
A_19_P00802937	na	na	na	na	na	na	na	na	0.0127	down	-1.85	na	9		AACTCATCACAGCTGTCCATGATGAACACACGGCGGACATACAGTTTGATGTTGTTCTTT	lincRNA:chr4:88813780-88814117_R	lincRNA:chr4:88813780-88814117_R	lincRNA:chr4:88813780-88814117 reverse strand
A_19_P00803039	na	na	na	na	na	na	na	na	0.0442	up	2.15	na	9		CCTGTGGCAAGTGCAGCAAGCACTGTTTCCTGTTTCTAAACTTGTAGAAAATCATCCATA	lincRNA:chr6:138119757-138151932_R	lincRNA:chr6:138119757-138151932_R	lincRNA:chr6:138119757-138151932 reverse strand
A_19_P00803109	na	na	na	na	0.0228147	up	1.31	na	na	na	na	na	9		CAGAACTGCTCCCTCTTCATCTCCATATTTTCATAAATAATTCCTTGTGTTTCAAATGGA	lincRNA:chr6:158658787-158724862_R	lincRNA:chr6:158658787-158724862_R	lincRNA:chr6:158658787-158724862 reverse strand
A_19_P00803122	na	na	na	na	0.0101166	down	-1.99	na	0.0322	down	-1.86	na	6		TGGTCCCTAAGCCTCCAGAAATGTCTTAATCCCCACCTTTTCTTATCCCGAAAAGGAATT	lincRNA:chr6:39949522-39974972_F	lincRNA:chr6:39949522-39974972_F	lincRNA:chr6:39949522-39974972 forward strand
A_19_P00803169	na	na	na	na	na	na	na	na	0.0431	up	1.95	na	9		GAGCCCAGTGGAACCTACACCTAAGTGGAAATGGAATTCTTTCCTTTTATTAAAACCTTC	lincRNA:chr1:58878762-58889862_R	lincRNA:chr1:58878762-58889862_R	lincRNA:chr1:58878762-58889862 reverse strand
A_19_P00803189	na	na	na	na	na	na	na	na	0.00908	down	-1.58	na	9		ATAACTCCCATCTCTTCCTCCTTTTGAGATTGTCTGAGTTCCAGAGGACTCATGTAGCAC	lincRNA:chr7:30216750-30313150_F	lincRNA:chr7:30216750-30313150_F	lincRNA:chr7:30216750-30313150 forward strand
A_19_P00803226	na	na	na	na	0.0124884	up	1.98	na	0.00804	up	1.81	na	6		GCGTGGGACAGCAGAGCCTTGTTTGCCATTAAAGTAATATCACAAGTCTGTTAAGGTTGG	lincRNA:chr8:144359650-144364750_R	lincRNA:chr8:144359650-144364750_R	lincRNA:chr8:144359650-144364750 reverse strand
A_19_P00803238	na	na	na	na	na	na	na	na	0.0282	down	-2.17	na	9		TACCTGTAGTTTGGTGAGTTTTCCCTGGTTCATGATTATTTCTTTCATCTTGTCGGAGCA	lincRNA:chr6:6683526-6811251_F	lincRNA:chr6:6683526-6811251_F	lincRNA:chr6:6683526-6811251 forward strand
A_19_P00803274	na	na	na	na	na	na	na	na	0.0463	down	-1.53	na	9		TTGGACAACAGCCTTCCAGATATATTTCCTTTTAGAAGTCCTATTCCCAGCAGGCCTCCA	lincRNA:chr4:95276702-95292977_R	lincRNA:chr4:95276702-95292977_R	lincRNA:chr4:95276702-95292977 reverse strand
A_19_P00803307	na	na	na	na	na	na	na	na	0.0239	down	-1.88	na	9		ACCACCTCCTCCACAGACAGCTGCCATTCAAGGGAACTCCCAGAAAGGCCAAAGGGTCTT	lincRNA:chr7:131549760-131565160_R	lincRNA:chr7:131549760-131565160_R	lincRNA:chr7:131549760-131565160 reverse strand
A_19_P00803338	na	na	na	na	na	na	na	na	0.02	down	-2.2	na	9		TGCTCCCTCCCCAGGCTGCCCGCACACACTCCACCCTGGAGGATGAGCTCACAGAGTCCC	lincRNA:chr3:129075510-129089860_F	lincRNA:chr3:129075510-129089860_F	lincRNA:chr3:129075510-129089860 forward strand
A_19_P00803349	na	na	na	na	na	na	na	na	0.0419	down	-1.81	na	9		ACTCAGCACTGCTCCTTGGATAACCAAACCAAGGCTGAAATCCCATGTATATGTGTCTAT	lincRNA:chr7:66366065-66371465_R	lincRNA:chr7:66366065-66371465_R	lincRNA:chr7:66366065-66371465 reverse strand
A_19_P00803360	na	na	na	na	na	na	na	na	0.0331	down	-2.54	na	9		TAAGGGAGTACTTTGGTGAGTTTGGGGAGGTGAATTTCTCCCCAGGATATGGTTTATGCT	lincRNA:chr6:52529916-52534966_F	lincRNA:chr6:52529916-52534966_F	lincRNA:chr6:52529916-52534966 forward strand
A_19_P00803393	0.0127	down	-1.69	na	na	na	na	na	na	na	na	na	9		GCATTGGGGTGAGACAGTGGTTTGGTGGTTATGTTTGGTTACTTTAGTTATGTTAGTAAC	lincRNA:chr5:44826637-44828692_F	lincRNA:chr5:44826637-44828692_F	lincRNA:chr5:44826637-44828692 forward strand
A_19_P00803463	na	na	na	na	na	na	na	na	0.0179	down	-2.22	na	9		TTCTCCTCCTCTCTCAAATCTACACTTTAATATTTCTTGATAGTGCCAATGACTCTCCAG	lincRNA:chr8:76121095-76189420_F	lincRNA:chr8:76121095-76189420_F	lincRNA:chr8:76121095-76189420 forward strand
A_19_P00803527	na	na	na	na	na	na	na	na	0.0438	down	-2.5	na	9		GTTTGCTTTCCTGGCCTCCTTTTCTCACTTTCTCTCCAAAATGAATCAGGATCAAGGAAG	lincRNA:chr4:115603001-115609926_R	lincRNA:chr4:115603001-115609926_R	lincRNA:chr4:115603001-115609926 reverse strand
A_19_P00803543	0.0289	up	1.84	na	na	na	na	na	0.0154	down	-2.03	na	6		AGACACTGTTTTAATCTTCTTGTGCCATGAGACTCCATCAGGCAGTCTACAAAGACCACT	lincRNA:chr1:173833042-173834652_F	lincRNA:chr1:173833042-173834652_F	lincRNA:chr1:173833042-173834652 forward strand
A_19_P00803578	na	na	na	na	na	na	na	na	0.0106	down	-3.04	na	9		CGCCCCACCTCCGCCAGAACAAAGTGAAGTTTAAAATAGAAACCAATTACCTGGGCTCCG	lincRNA:chr18:74178337-74203637_F	lincRNA:chr18:74178337-74203637_F	lincRNA:chr18:74178337-74203637 forward strand
A_19_P00803579	na	na	na	na	0.00466281	down	-2.45	na	na	na	na	na	9		CCCACGAAGGAAGACAGCTCTGCTGAACTCAAATTGGCAACCCAGCTGACAGGACCAGTA	lincRNA:chr3:108262135-108268435_R	lincRNA:chr3:108262135-108268435_R	lincRNA:chr3:108262135-108268435 reverse strand
A_19_P00803582	na	na	na	na	na	na	na	na	0.00197	down	-2.2	na	9		TTTGCAAGCTGCATGTTCATGTAGCCATCTAAGATGCCAGATAGCCCTTGTACTCCATTC	lincRNA:chr1:26211738-26216813_R	lincRNA:chr1:26211738-26216813_R	lincRNA:chr1:26211738-26216813 reverse strand
A_19_P00803587	na	na	na	na	na	na	na	na	0.0437	up	1.48	na	9		CCAAATGGCCCCTTGAGTATTTTTATTGACTTGTTACACACATTTTTGTCTTTGATGTCT	lincRNA:chr16:20864099-20869374_R	lincRNA:chr16:20864099-20869374_R	lincRNA:chr16:20864099-20869374 reverse strand
A_19_P00803606	0.0256	up	2.32	na	na	na	na	na	na	na	na	na	9		AGGAGTCTCACAGAGAATTGACTCCTTGCCCACCTATACTACCTTTGTGGGTAGAGACTC	lincRNA:chr13:79987824-79996624_F	lincRNA:chr13:79987824-79996624_F	lincRNA:chr13:79987824-79996624 forward strand
A_19_P00803638	na	na	na	na	na	na	na	na	0.00412	down	-3.76	na	9		AGCAATCTCCCCGCCCCAGAATTATTTCAGTTTCCTCATCTGTCAGTTCTAGGGGTGGAC	lincRNA:chr6:44046036-44046378_R	lincRNA:chr6:44046036-44046378_R	lincRNA:chr6:44046036-44046378 reverse strand
A_19_P00803654	na	na	na	na	0.0145436	down	-2.73	na	na	na	na	na	9		ATGTGCATATCAGTGTCTTCAAGGAGAAAGCCAGAGTCATCACCAAGGAGAAGTTCTTTA	lincRNA:chr3:108262135-108268435_R	lincRNA:chr3:108262135-108268435_R	lincRNA:chr3:108262135-108268435 reverse strand
A_19_P00803685	na	na	na	na	0.0119085	up	2.03	na	na	na	na	na	9		ATATTTTCCTATTCAGACCTCAGGGCTATTTTGGGACCTACAAATAAATGGGATTCCCAG	lincRNA:chrX:115401722-115413847_R	lincRNA:chrX:115401722-115413847_R	lincRNA:chrX:115401722-115413847 reverse strand
A_19_P00803702	na	na	na	na	na	na	na	na	0.0262	down	-2.5	na	9		AGAATGTGTTCTAAAGCTTGTGGGTCCCAAAGGTCCTCAGCCAGTCAATAGATTCAGTAG	lincRNA:chr7:30586150-30619124_F	lincRNA:chr7:30586150-30619124_F	lincRNA:chr7:30586150-30619124 forward strand
A_19_P00803763	0.026	down	-1.88	na	0.0242248	down	-2.76	na	na	na	na	na	6		GCTATAGGCAACCGCAATTGACAGCAATAAATCTCGTCAGGAATGGAAATGTATGAATTG	lincRNA:chr3:178663581-178724706_R	lincRNA:chr3:178663581-178724706_R	lincRNA:chr3:178663581-178724706 reverse strand
A_19_P00803876	na	na	na	na	na	na	na	na	0.0295	down	-2.95	na	9		CCTTGAGATTTTTCTGGAAGCATAATGCCTCCTTTGGTTACAGTTGTGGTGGCAATCCTT	lincRNA:chr2:235342486-235379011_F	lincRNA:chr2:235342486-235379011_F	lincRNA:chr2:235342486-235379011 forward strand
A_19_P00803900	na	na	na	na	na	na	na	na	0.0371	down	-1.66	na	9		AGCACATGCTCATTGTCCTTGTCTTTCCCATGTTAATTCATATTGCCCTGCACCTAGGTC	lincRNA:chr7:63922340-63962340_F	lincRNA:chr7:63922340-63962340_F	lincRNA:chr7:63922340-63962340 forward strand
A_19_P00803912	na	na	na	na	na	na	na	na	0.0305	up	7.53	na	9		AGGGAGATGTTAAAGATTTTAACTTGGCTATGGTAACACAGGTCACTAGTTTCCTTTTCC	lincRNA:chr5:141705866-141714891_F	lincRNA:chr5:141705866-141714891_F	lincRNA:chr5:141705866-141714891 forward strand
A_19_P00803996	na	na	na	na	na	na	na	na	0.0261	down	-1.72	na	9		AAGTGTACAAGAACTGCTAACTCATGCCCCCATGCCTAGCAACATGGCTTTCTCAACTTT	lincRNA:chr1:181309852-181429627_F	lincRNA:chr1:181309852-181429627_F	lincRNA:chr1:181309852-181429627 forward strand
A_19_P00803997	na	na	na	na	0.0295194	up	3.12	na	na	na	na	na	9		TTTCCTTCTTTTTCCTTGCTCAGAAAAAATTGGAGAAGGCTTTATTTTAAAATTCTGCCT	lincRNA:chr22:45527761-45557568_R	lincRNA:chr22:45527761-45557568_R	lincRNA:chr22:45527761-45557568 reverse strand
A_19_P00804017	na	na	na	na	na	na	na	na	0.00675	down	-3.61	na	9		TTTTCCTGGAGGATATGACACTGACATCAGCAGGGTTTTCAATGGCAACAATGGCACAAG	lincRNA:chr2:174893054-174925329_R	lincRNA:chr2:174893054-174925329_R	lincRNA:chr2:174893054-174925329 reverse strand
A_19_P00804020	0.0466	up	1.46	na	na	na	na	na	na	na	na	na	9		GTGACCATGGCAGAGTTGAATGCCATCATCGGGCAGCAGCAGTTGCAAGCTCAGCATCTT	lincRNA:chrX:64628047-64628361_F	lincRNA:chrX:64628047-64628361_F	lincRNA:chrX:64628047-64628361 forward strand
A_19_P00804072	na	na	na	na	na	na	na	na	0.0426	up	2.73	na	9		GTCAAAGAGAGCCTGGGACTGAACGGTGACTTCAGTGTTCTCAACACTTTACTAAATTTT	lincRNA:chr17:78296530-78306830_F	lincRNA:chr17:78296530-78306830_F	lincRNA:chr17:78296530-78306830 forward strand
A_19_P00804129	na	na	na	na	na	na	na	na	0.0244	down	-2.17	na	9		AGATACGAAATACCAGAAGCTGGACTTGGCGACGACATGATTAGGCGCAAACATTCACAT	lincRNA:chrX:110756819-110881269_F	lincRNA:chrX:110756819-110881269_F	lincRNA:chrX:110756819-110881269 forward strand
A_19_P00804132	na	na	na	na	na	na	na	na	0.0322	up	1.57	na	9		AACACAAATCTTGGATATTGCCAAAGGAAGCCATTCAGCAGCTGCTGGGGTTTTTCATCC	lincRNA:chr16:20866393-20866851_R	lincRNA:chr16:20866393-20866851_R	lincRNA:chr16:20866393-20866851 reverse strand
A_19_P00804194	na	na	na	na	na	na	na	na	0.0371	down	-1.48	na	9		TCAAATGCTATTCCACTTTTCCACTTCGCCACTCCTAGTCCAGCCTAGGGTGAACATCTC	lincRNA:chr6:33091097-33099422_F	lincRNA:chr6:33091097-33099422_F	lincRNA:chr6:33091097-33099422 forward strand
A_19_P00804404	na	na	na	na	na	na	na	na	0.00849	down	-2.94	na	9		TATCTCTTACAGTAGGCCTTATACTTGACAACTTTAACAAACCCCACCCTGCGGAACAGA	lincRNA:chr13:51646474-51767474_F	lincRNA:chr13:51646474-51767474_F	lincRNA:chr13:51646474-51767474 forward strand
A_19_P00804417	na	na	na	na	na	na	na	na	0.0117	up	2.44	na	9		TGATTCTAGGGTCAGGGCCCTCACTCACACTGCTGGAAGGTTAAAGTCGACTTCACGCTA	lincRNA:chr4:6672456-6675615_R	lincRNA:chr4:6672456-6675615_R	lincRNA:chr4:6672456-6675615 reverse strand
A_19_P00804489	na	na	na	na	na	na	na	na	0.0446	down	-1.66	na	9		AGTCACTGTCCAGATGATGGCAAGTCTTTCTCAGAAGCAGAGGGCCTTGGTGTGCCAGTG	lincRNA:chr15:25264182-25266585_F	lincRNA:chr15:25264182-25266585_F	lincRNA:chr15:25264182-25266585 forward strand
A_19_P00804527	na	na	na	na	0.0383758	down	-1.46	na	na	na	na	na	9		AAACACTAAATGATGTGGCCAGTTAGTGAGAATGTAGCCTTATCTTTACTGACCTCATTT	lincRNA:chr2:37325696-37331035_R	lincRNA:chr2:37325696-37331035_R	lincRNA:chr2:37325696-37331035 reverse strand
A_19_P00804546	0.0245	up	2.49	na	na	na	na	na	0.0199	down	-1.93	na	6		GACATTGAATGACTGTATGCTGCTTTTGATTTCCGTTAATATGGGCAACTGTCCAATTAA	lincRNA:chrX:133675909-133683184_R	lincRNA:chrX:133675909-133683184_R	lincRNA:chrX:133675909-133683184 reverse strand
A_19_P00804571	na	na	na	na	0.00297877	up	2.29	na	na	na	na	na	9		TGAAGCTGCTAGTCAGTCACATTCGACATTCATTATCTTCACTGGCTACTCGTCCACACT	lincRNA:chr6:86386083-86388435_F	lincRNA:chr6:86386083-86388435_F	lincRNA:chr6:86386083-86388435 forward strand
A_19_P00804596	0.00171	up	1.81	na	0.00194266	up	1.9	na	0.0131	down	-1.43	na	3		GGGAACAGGGCTTCTCTAGATTATTTCAGGGAACGAGCTATTATTTGAATGTTAATTTAA	lincRNA:chr17:21435959-21436405_R	lincRNA:chr17:21435959-21436405_R	lincRNA:chr17:21435959-21436405 reverse strand
A_19_P00804666	na	na	na	na	na	na	na	na	0.0149	down	-6.93	na	9		GGTGTGTGTGTGTCTAATAAAAAAGTGTAAGAGTGATCTTAGAAAAGGAATGACCCCTTC	lincRNA:chr19:57769688-57777413_R	lincRNA:chr19:57769688-57777413_R	lincRNA:chr19:57769688-57777413 reverse strand
A_19_P00804739	0.0484	up	1.33	na	na	na	na	na	0.0481	down	-1.6	na	6		ATTCTCAGGCCTTTTCTCAAACAGGGGATTCACCACTTTCTTGGCCTCCTGTTTCTTCAT	lincRNA:chr10:33330294-33409444_F	lincRNA:chr10:33330294-33409444_F	lincRNA:chr10:33330294-33409444 forward strand
A_19_P00804777	na	na	na	na	na	na	na	na	0.0325	down	-1.8	na	9		CAGCTAGAGCCATCTGGTCGACCTTAGACATGTCAAGGCAGGAGCCATCTGATCGACCTT	lincRNA:chr19:28268097-28296683_R	lincRNA:chr19:28268097-28296683_R	lincRNA:chr19:28268097-28296683 reverse strand
A_19_P00804843	0.0259	up	1.17	na	na	na	na	na	na	na	na	na	9		GGCCAGGGCATGTCTTCTTATTCCATGTGACAGTGGCTGGCTGAGTTGCTAGTACGTTTT	lincRNA:chr8:107284490-107284921_F	lincRNA:chr8:107284490-107284921_F	lincRNA:chr8:107284490-107284921 forward strand
A_19_P00804940	na	na	na	na	na	na	na	na	0.0359	down	-3.27	na	9		TACAGCAGCAGCAGTTAAGTAGAAGATGTTCACACTTCCTCGCTCTGCATCTTTCTTCCT	lincRNA:chr16:24474974-24486974_R	lincRNA:chr16:24474974-24486974_R	lincRNA:chr16:24474974-24486974 reverse strand
A_19_P00805006	na	na	na	na	0.0161115	up	1.64	na	0.00424	up	2.69	na	6		CTGGTGTTTTGAGAAGCCCTACTGCTGAAAACTTAACAATTTTGTGTAATAAAAATGGAG	lincRNA:chr11:65265824-65275174_F	lincRNA:chr11:65265824-65275174_F	lincRNA:chr11:65265824-65275174 forward strand
A_19_P00805168	na	na	na	na	na	na	na	na	0.0155	down	-3.8	na	9		TCCCAGGAGCTGGTCCAGGCGGGGCACAATATGCAGGCAGATCTGGAGGGCGAGATGGGC	lincRNA:chr16:88805249-88810399_F	lincRNA:chr16:88805249-88810399_F	lincRNA:chr16:88805249-88810399 forward strand
A_19_P00805171	na	na	na	na	na	na	na	na	0.02	down	-1.39	na	9		TTCTGTGGAACAGGCTGGACCCCAGATGGCCTGGGATGCGGGGGCCTGGGTTGAGCGGCG	lincRNA:chr8:22847955-22856530_R	lincRNA:chr8:22847955-22856530_R	lincRNA:chr8:22847955-22856530 reverse strand
A_19_P00805272	0.00215	down	-1.75	na	na	na	na	na	na	na	na	na	9		AAGTTTCATATGCACAGAAGAGCAGTTGGAAATCTGGTCGACTGCAATAAAACAAGATGA	lincRNA:chr22:25588075-25594350_F	lincRNA:chr22:25588075-25594350_F	lincRNA:chr22:25588075-25594350 forward strand
A_19_P00805330	na	na	na	na	0.0370567	up	2.25	na	na	na	na	na	9		ACAAAAAATTCACAACACCATGGCCTCATACAAAAATGCTGGGCTGCAGGAAACCTGAGG	lincRNA:chr3:128575310-128592110_F	lincRNA:chr3:128575310-128592110_F	lincRNA:chr3:128575310-128592110 forward strand
A_19_P00805352	na	na	na	na	0.028608	up	1.24	na	na	na	na	na	9		TGGTCATCCTCTCTAACAACTGCCCAGCTTTGAGGAAATCCAAAATAGAGTACTATGAAA	lincRNA:chr2:9204749-9226049_R	lincRNA:chr2:9204749-9226049_R	lincRNA:chr2:9204749-9226049 reverse strand
A_19_P00805426	na	na	na	na	na	na	na	na	0.0272	up	1.2	na	9		AATGATAAGATAAGCCTGAAGATAACTGAAGTGTTGTTCCTGCCTTCCTTCTTTCTTCAT	lincRNA:chr7:126990389-127006297_F	lincRNA:chr7:126990389-127006297_F	lincRNA:chr7:126990389-127006297 forward strand
A_19_P00805500	na	na	na	na	na	na	na	na	0.044	up	2.37	na	9		AGGTGTGAGTAGTGGGTAAAACCAGGGCTGCAACAAGCGTTAGAAACAGATTATCCTAAG	lincRNA:chr1:94158912-94293837_R	lincRNA:chr1:94158912-94293837_R	lincRNA:chr1:94158912-94293837 reverse strand
A_19_P00805516	na	na	na	na	na	na	na	na	0.00756	down	-1.58	na	9		AAATCTCTCTCCCAGTTGGCTTCATTTTCCCAGGCTGGCTGGCTGTGCAAGACACACGCC	lincRNA:chr8:96083774-96119899_R	lincRNA:chr8:96083774-96119899_R	lincRNA:chr8:96083774-96119899 reverse strand
A_19_P00805521	na	na	na	na	na	na	na	na	0.0201	down	-1.55	na	9		TGGTTGTGAACAAAAGATGGTGTCACTGAGGCAGCCACCTTCCCAGTTCTGGCCCCACAG	lincRNA:chr14:96089622-96112397_F	lincRNA:chr14:96089622-96112397_F	lincRNA:chr14:96089622-96112397 forward strand
A_19_P00805529	na	na	na	na	na	na	na	na	0.00797	down	-3.1	na	9		TGTGGTTGTGAACACCTTTCAACACTGCCTTCTTGGCCTTTAAAGCCTTTGCTTTGGCTT	lincRNA:chr21:40494005-40522430_R	lincRNA:chr21:40494005-40522430_R	lincRNA:chr21:40494005-40522430 reverse strand
A_19_P00805563	na	na	na	na	na	na	na	na	0.0262	up	2.57	na	9		CTCTCTTAGCCTCAATGTCTACTAACATAGTTCATATTCTGTTAAAGTTATGAGCATTCG	lincRNA:chr6:5047814-5048418_F	lincRNA:chr6:5047814-5048418_F	lincRNA:chr6:5047814-5048418 forward strand
A_19_P00805569	na	na	na	na	na	na	na	na	0.0488	down	-2.56	na	9		TATTAGAAGGATGCGTGTTCAATATGTATGAGTTTGGGGTGGCTGAGGGGTTGTTACCCT	lincRNA:chr11:104771490-104780740_F	lincRNA:chr11:104771490-104780740_F	lincRNA:chr11:104771490-104780740 forward strand
A_19_P00805613	na	na	na	na	na	na	na	na	0.0164	down	-3.8	na	9		TCTATTACCAGGGGTTCAGGACAGCCTAGTTTTGTTAGAAGCTGTATTGTAGGAAAGCCT	lincRNA:chr8:94969544-94969892_F	lincRNA:chr8:94969544-94969892_F	lincRNA:chr8:94969544-94969892 forward strand
A_19_P00805621	na	na	na	na	na	na	na	na	0.0327	down	-2.41	na	9		GAAAGATGCAGAGCGAGGAAGTGTGAACATCTTCTACTTAACTGCTGCTGCTGTAATTCT	lincRNA:chr16:24474974-24486974_F	lincRNA:chr16:24474974-24486974_F	lincRNA:chr16:24474974-24486974 forward strand
A_19_P00805625	na	na	na	na	0.0182607	up	2.4	na	0.00721	up	2.06	na	6		CATGATAGAAGACAGGCAGGGATGCCACAATCATAACCATGGCAAAGACCAGGATCAGAA	lincRNA:chr9:132251336-132267691_F	lincRNA:chr9:132251336-132267691_F	lincRNA:chr9:132251336-132267691 forward strand
A_19_P00805628	na	na	na	na	na	na	na	na	0.032	down	-2.46	na	9		AACATTATTTACCCACCAGAAGCTCCACCATAGTCCACCCACCAGAAGATTCAGCATCGT	lincRNA:chr21:11120554-11146454_R	lincRNA:chr21:11120554-11146454_R	lincRNA:chr21:11120554-11146454 reverse strand
A_19_P00805639	0.0426	down	-2.75	na	na	na	na	na	na	na	na	na	9		AGATACCTCTGAACAGGAGCCTCAACACCAGGCAGACAGGTTCCTGGGAAACCTTGAGTG	lincRNA:chr1:9233849-9234611_R	lincRNA:chr1:9233849-9234611_R	lincRNA:chr1:9233849-9234611 reverse strand
A_19_P00805686	0.0341	up	1.37	na	na	na	na	na	na	na	na	na	9		GCGGGTGAGGTCTCTTTTGGGCTGGATGTCCTGTCCAATGCCAAAATTCTTAGGCCTTTC	lincRNA:chr4:113709183-113709999_F	lincRNA:chr4:113709183-113709999_F	lincRNA:chr4:113709183-113709999 forward strand
A_19_P00805746	na	na	na	na	na	na	na	na	0.0203	down	-1.36	na	9		CAGGGAGACCCTTACTTTTCTTTTAATATGTTCCCCCCTTTTGTTTGGATTTTTAACGAT	lincRNA:chr6:167382710-167411685_F	lincRNA:chr6:167382710-167411685_F	lincRNA:chr6:167382710-167411685 forward strand
A_19_P00805757	na	na	na	na	0.0460149	down	-1.49	na	0.0463	up	1.21	na	6		GCAAGTACAGGTTTTTAATGTTGTCTGTCTTCTGTGCTATTCCTGTAAGTTTGCTATTAA	lincRNA:chr2:178145929-178214236_F	lincRNA:chr2:178145929-178214236_F	lincRNA:chr2:178145929-178214236 forward strand
A_19_P00805833	na	na	na	na	0.00348051	down	-3.04	na	na	na	na	na	9		TCCTTGCTACTTGGTATCTTGAAATCTGGTACGAAACTATTGCATGATCCCTGCACCTTT	lincRNA:chr16:10479917-10481598_F	lincRNA:chr16:10479917-10481598_F	lincRNA:chr16:10479917-10481598 forward strand
A_19_P00805876	na	na	na	na	na	na	na	na	0.0197	down	-2.26	na	9		TTGTTAAACACTTTAAATGTCAGATTTGCCCCCATCCCGCCCGCAAAACGTGCTTTACAA	lincRNA:chrX:133675909-133683184_F	lincRNA:chrX:133675909-133683184_F	lincRNA:chrX:133675909-133683184 forward strand
A_19_P00805877	na	na	na	na	na	na	na	na	0.0166	down	-1.79	na	9		CCTTGTCCCTACCCAAATCTCATCTCTTGAAAGTCTCTGCTTTGATCACAAATATTTAAA	lincRNA:chr12:5231714-5344139_R	lincRNA:chr12:5231714-5344139_R	lincRNA:chr12:5231714-5344139 reverse strand
A_19_P00805975	na	na	na	na	na	na	na	na	0.024	down	-2.13	na	9		CAAAAGTCATTTCACAGAGTGCTTGGATCAGTGGGCTGGGGCGGCTGGAGAGGAGCAGAT	lincRNA:chr11:63945949-63951674_F	lincRNA:chr11:63945949-63951674_F	lincRNA:chr11:63945949-63951674 forward strand
A_19_P00806028	na	na	na	na	0.047597	down	-1.76	na	na	na	na	na	9		AGGATGAAAGAGGACCTGGGAGCAGCAACTTTGTTCTGGTTTGTTGTTTTCTCTTCCCTA	lincRNA:chr6:42725472-42759772_F	lincRNA:chr6:42725472-42759772_F	lincRNA:chr6:42725472-42759772 forward strand
A_19_P00806078	na	na	na	na	0.0292063	up	1.31	na	na	na	na	na	9		TAGAAGAGGCTGGCTGCCGAGTTTACATGAGGCCACTGAAGATCTAAGTCCAGCTCCGCC	lincRNA:chr13:48581699-48595174_F	lincRNA:chr13:48581699-48595174_F	lincRNA:chr13:48581699-48595174 forward strand
A_19_P00806290	na	na	na	na	na	na	na	na	0.0464	down	-1.42	na	9		AATCTTTGTACACATTCCCCCTCCCTGGTCTGAGGTGTAGAATCCCTTTTGTTGCTTCTT	lincRNA:chr1:180915452-180922102_R	lincRNA:chr1:180915452-180922102_R	lincRNA:chr1:180915452-180922102 reverse strand
A_19_P00806302	na	na	na	na	0.0336642	down	-3.33	na	na	na	na	na	9		AGACACATATTAACAGTTGGTGACTTATCGCCAGTTGGTGACTTACTTACCTACCCCTGC	lincRNA:chr4:24517527-24528002_R	lincRNA:chr4:24517527-24528002_R	lincRNA:chr4:24517527-24528002 reverse strand
A_19_P00806378	na	na	na	na	na	na	na	na	0.0247	down	-1.59	na	9		TAGCAAATTACATTGGTGTCTGCCCACCACTGAAGGCAAAAAGCTGGTTTATCTAGGCCA	lincRNA:chr4:129141800-129151475_F	lincRNA:chr4:129141800-129151475_F	lincRNA:chr4:129141800-129151475 forward strand
A_19_P00806397	0.00525	up	1.78	na	na	na	na	na	na	na	na	na	9		TCTGAAGACAGGCACGGGCTCAGGCACCGCTTGTCTGGAATGTCAATTTGAAACTTAAAA	lincRNA:chr2:111965352-112252622_F	lincRNA:chr2:111965352-112252622_F	lincRNA:chr2:111965352-112252622 forward strand
A_19_P00806418	na	na	na	na	0.0095172	up	1.45	na	na	na	na	na	9		AATGGGGATGGTGGTCCTGCTCCAAGATGATAAGTGGAGGCTGAGCGTCACTGGTACTGG	lincRNA:chr1:203006577-203017867_F	lincRNA:chr1:203006577-203017867_F	lincRNA:chr1:203006577-203017867 forward strand
A_19_P00806547	na	na	na	na	0.0327378	down	-1.25	na	na	na	na	na	9		TATTTGCTGAGTGTCACTGTGCCAAGCCCTGGGGCTAAAACTAATCAAGATTTGGTTCTT	lincRNA:chr4:76460401-76476026_F	lincRNA:chr4:76460401-76476026_F	lincRNA:chr4:76460401-76476026 forward strand
A_19_P00806684	na	na	na	na	na	na	na	na	0.042	down	-1.57	na	9		GGTCCACCTATGTCCCTGGCATTAGATGACTCCACAAAGTTTTATTTTATATTGAATTAT	lincRNA:chr7:30419650-30454050_R	lincRNA:chr7:30419650-30454050_R	lincRNA:chr7:30419650-30454050 reverse strand
A_19_P00806758	na	na	na	na	na	na	na	na	0.00219	down	-8.74	na	9		GCGACCGACCCCGCGCAACTGGCTCGGGTCTGCACCTAGATGGCTGTGGGCCCCACAGGG	lincRNA:chr3:36985666-36986208_F	lincRNA:chr3:36985666-36986208_F	lincRNA:chr3:36985666-36986208 forward strand
A_19_P00806772	na	na	na	na	0.00446162	down	-1.38	na	na	na	na	na	9		CGGATGGATTTGGGGAGAACACAGTGACTCAAGTGTGGCTGTGTGGAGTAGTGTGAACGT	lincRNA:chr13:113925599-113933724_F	lincRNA:chr13:113925599-113933724_F	lincRNA:chr13:113925599-113933724 forward strand
A_19_P00806882	na	na	na	na	na	na	na	na	0.016	down	-2.81	na	9		GGTGGAGAGATTCAACCAGTTAGCATGAGAGTTGGAGATAAATTTCTTCTCCTAGAATAT	lincRNA:chr2:235342486-235379011_R	lincRNA:chr2:235342486-235379011_R	lincRNA:chr2:235342486-235379011 reverse strand
A_19_P00806890	na	na	na	na	na	na	na	na	0.0309	down	-2.1	na	9		CACAGTCCCCGCTGGACTCTCTTGGTCCGTCCGCCCCCCACAGTCCCCGCTGGACTCTCT	lincRNA:chr8:145986196-145991421_F	lincRNA:chr8:145986196-145991421_F	lincRNA:chr8:145986196-145991421 forward strand
A_19_P00806936	na	na	na	na	na	na	na	na	0.0094	down	-1.95	na	9		AGGGATGGACCTACCCCAGCCCACGCTCCCAGAGGAGGGATGGACCTACCCCAGCCCACG	lincRNA:chr11:70862452-70959427_F	lincRNA:chr11:70862452-70959427_F	lincRNA:chr11:70862452-70959427 forward strand
A_19_P00806947	na	na	na	na	0.0469548	down	-1.53	na	na	na	na	na	9		CAGCATATACTGAAGTCTTTTCTGCCACCAAATTTGTACCTCTAAGTACATATGTAGATA	lincRNA:chrX:45897556-45923781_R	lincRNA:chrX:45897556-45923781_R	lincRNA:chrX:45897556-45923781 reverse strand
A_19_P00806974	na	na	na	na	na	na	na	na	0.00274	down	-1.91	na	9		AAATTCTGGCTGGACTCGGCTGCTCTTCTTGATTCTTCGTTTCCTCACTGAAGTTTCTTG	lincRNA:chr6:56749266-56765891_F	lincRNA:chr6:56749266-56765891_F	lincRNA:chr6:56749266-56765891 forward strand
A_19_P00807024	na	na	na	na	na	na	na	na	0.0365	up	1.87	na	9		TCTGGAATGATAACCTGTGGGATACAGTCAACTTTCTGCCAGAGCTCCATTTGAGCTTGA	lincRNA:chr10:67330944-67543094_F	lincRNA:chr10:67330944-67543094_F	lincRNA:chr10:67330944-67543094 forward strand
A_19_P00807028	na	na	na	na	na	na	na	na	0.0031	down	-1.75	na	9		TTCTTTCTCCATAGCTCCAGGATGTACTTGTATGCACCCATCTTGGCTTATCTGATGGCT	lincRNA:chr22:27056775-27309800_F	lincRNA:chr22:27056775-27309800_F	lincRNA:chr22:27056775-27309800 forward strand
A_19_P00807030	0.0221	down	-1.33	na	0.025411	down	-1.3	na	0.00526	down	-2.02	na	3		ATTTGTTAACTGGGTCTTTGTCTTTCTTGGCCGACTTTCCAGCATCCTTCTTCTTGTCAT	lincRNA:chr11:27594974-27650174_R	lincRNA:chr11:27594974-27650174_R	lincRNA:chr11:27594974-27650174 reverse strand
A_19_P00807145	na	na	na	na	na	na	na	na	0.0389	down	-1.92	na	9		GAACTCAACAATGCCTTTCCCTAAGGGCCTTCCTTGATCATCCACAATGACTACAGCCCT	lincRNA:chr2:61157146-61167346_F	lincRNA:chr2:61157146-61167346_F	lincRNA:chr2:61157146-61167346 forward strand
A_19_P00807187	na	na	na	na	na	na	na	na	0.0169	down	-1.69	na	9		AGGAGCCACCACACTGTGCCCCACTGGGTGCCCCAAGTGGCTTGACTTTGCAGATTCTCG	lincRNA:chr1:247372146-247372531_F	lincRNA:chr1:247372146-247372531_F	lincRNA:chr1:247372146-247372531 forward strand
A_19_P00807193	na	na	na	na	na	na	na	na	0.0359	up	1.91	na	9		TCTGGGGTCCTAGCACTTCCCCTAACATCATCTCATGATACTTAGACTTTAAAAGAACCC	lincRNA:chr22:35836075-35843450_F	lincRNA:chr22:35836075-35843450_F	lincRNA:chr22:35836075-35843450 forward strand
A_19_P00807228	na	na	na	na	na	na	na	na	0.0266	down	-2.36	na	9		CTCACGGGGGACAGAGGTGGCGCTGGCAGAGCTCACGGGGGACAGAGGTGGCGCTGGCAG	lincRNA:chr11:70522127-70719227_F	lincRNA:chr11:70522127-70719227_F	lincRNA:chr11:70522127-70719227 forward strand
A_19_P00807230	na	na	na	na	0.0141483	down	-1.48	na	na	na	na	na	9		GCTTTGGCGGGTTTATCTGGCTTTATAAACAAGTCTGAAAAATGGATGAAAGCTAAATAT	lincRNA:chr5:108527309-108533551_F	lincRNA:chr5:108527309-108533551_F	lincRNA:chr5:108527309-108533551 forward strand
A_19_P00807298	na	na	na	na	na	na	na	na	0.0283	down	-2.6	na	9		TGGAGTATCTTTTGGGTCTTAGCTATTGTGTGTTCAGAAGTATTAAAGCCACTTTCGTAG	lincRNA:chr2:40946996-41235296_R	lincRNA:chr2:40946996-41235296_R	lincRNA:chr2:40946996-41235296 reverse strand
A_19_P00807328	na	na	na	na	na	na	na	na	0.0232	up	4.28	na	9		ATGATACACTTACATCCTCTACCTTTTGTTTCCAGGCACAGATCATTTCAGGTGCCTTCT	lincRNA:chr11:68040524-68046124_F	lincRNA:chr11:68040524-68046124_F	lincRNA:chr11:68040524-68046124 forward strand
A_19_P00807395	na	na	na	na	na	na	na	na	0.0248	down	-2.68	na	9		TTTAACATTTACACCAGCTGCTTTAATGAGGTCATTGATCTTATCCTCCCTGACAGTCAC	lincRNA:chr1:171777002-171796702_F	lincRNA:chr1:171777002-171796702_F	lincRNA:chr1:171777002-171796702 forward strand
A_19_P00807493	na	na	na	na	na	na	na	na	0.0384	down	-2.93	na	9		TAACATATACCCTCTCCCCCAAAGTCAGGACATGTTTCTGACTTGTAAGACAGAAGGGTG	lincRNA:chr20:25213650-25221750_F	lincRNA:chr20:25213650-25221750_F	lincRNA:chr20:25213650-25221750 forward strand
A_19_P00807501	na	na	na	na	na	na	na	na	0.0186	down	-3.72	na	9		CCTTCTTGGTATAAAGGTGAACAATTCTATTACCAGGGGTTCAGGACAGCCTAGTTTTGT	lincRNA:chr8:94968549-94974474_F	lincRNA:chr8:94968549-94974474_F	lincRNA:chr8:94968549-94974474 forward strand
A_19_P00807615	na	na	na	na	na	na	na	na	0.00223	down	-2.41	na	9		AGTCTTTTCCTTTCCCATTTTGGCTTTTGGGGGTAGTTTTCATGACACCTGTGTTCTGGC	lincRNA:chr2:107293518-107358418_F	lincRNA:chr2:107293518-107358418_F	lincRNA:chr2:107293518-107358418 forward strand
A_19_P00807641	na	na	na	na	na	na	na	na	0.0388	down	-1.5	na	9		CCAGGTAAAGACAGCACACGGAAGGAGACTGACACGTGATTTTCTCCCCCTCCAGGCCTA	lincRNA:chr10:113880935-113887685_F	lincRNA:chr10:113880935-113887685_F	lincRNA:chr10:113880935-113887685 forward strand
A_19_P00807689	na	na	na	na	na	na	na	na	0.0312	down	-3.21	na	9		GACTCCTTCTGCTGCTGCTGGAGGAAACCATGTCTTCTCAGGGAAAATTTGTCAGCTACC	lincRNA:chr7:105564174-105564567_R	lincRNA:chr7:105564174-105564567_R	lincRNA:chr7:105564174-105564567 reverse strand
A_19_P00807697	na	na	na	na	na	na	na	na	0.0297	down	-1.63	na	9		AAAGAAGACGTTCCCAGCTGCCATCCAGAGCTCATCACACCAAGTCTTTGGGGGCTGTGG	lincRNA:chr4:6683199-6683665_F	lincRNA:chr4:6683199-6683665_F	lincRNA:chr4:6683199-6683665 forward strand
A_19_P00807734	na	na	na	na	0.0348854	down	-1.74	na	na	na	na	na	9		CCTGGCACCCAAGTGGACACAGGTGGTGGTCCTGTAACAGTGGCTTGATTACGCTGTTTT	lincRNA:chr13:33910354-33910793_R	lincRNA:chr13:33910354-33910793_R	lincRNA:chr13:33910354-33910793 reverse strand
A_19_P00807901	na	na	na	na	na	na	na	na	0.0213	down	-1.48	na	9		TACCATCTTGGAAACTTCCGTATCACTCCGCTGGGCCTGTGGACCCTGAACATGTGGCTC	lincRNA:chr2:121220455-121308130_F	lincRNA:chr2:121220455-121308130_F	lincRNA:chr2:121220455-121308130 forward strand
A_19_P00808033	na	na	na	na	0.0210849	down	-2.02	na	na	na	na	na	9		GCATAAAGATTCATAATGGCAAAACGAAGCATGTCCCATCATACCCCTTCATTCCTACCT	lincRNA:chr2:37066296-37072571_R	lincRNA:chr2:37066296-37072571_R	lincRNA:chr2:37066296-37072571 reverse strand
A_19_P00808127	0.0228	down	-1.98	na	na	na	na	na	na	na	na	na	9		GCCTAAGGGTACACCTCCCCCAATAACTTACAGAGAAATTTAAAATGAATATTTGCAAAT	lincRNA:chr2:178239229-178257329_R	lincRNA:chr2:178239229-178257329_R	lincRNA:chr2:178239229-178257329 reverse strand
A_19_P00808190	na	na	na	na	na	na	na	na	0.0473	down	-2.15	na	9		TTCGCTGGGGCAGGGATGCTTGCATGTGTAATCTTACTAAGAGCTAATAAAAAGGTCAGG	lincRNA:chr8:32772708-32913758_R	lincRNA:chr8:32772708-32913758_R	lincRNA:chr8:32772708-32913758 reverse strand
A_19_P00808208	na	na	na	na	0.00151211	down	-1.45	na	0.00465	down	-1.59	na	6		CAAGTTTGCCTTAGCACGAGTGACCACAGTTTAATAGACCACACACATCATTTAACCTGC	lincRNA:chr8:43518693-43531493_R	lincRNA:chr8:43518693-43531493_R	lincRNA:chr8:43518693-43531493 reverse strand
A_19_P00808297	na	na	na	na	na	na	na	na	0.0164	down	-2.39	na	9		GTGTGAGTTTTCTTGCCCTCTGGTTTTCAGAATTCTGTGTAGTTTCTCAACATTTCCTTT	lincRNA:chr2:179375079-179386329_F	lincRNA:chr2:179375079-179386329_F	lincRNA:chr2:179375079-179386329 forward strand
A_19_P00808315	0.0217	up	2.9	na	0.0066274	up	2.9	na	na	na	na	na	6		CAAAGGGAGTCCACGCCACCTTTGCATTGGAATCTGACAACTGAGCATTAGAAGGTACAT	lincRNA:chr2:134708080-134794155_R	lincRNA:chr2:134708080-134794155_R	lincRNA:chr2:134708080-134794155 reverse strand
A_19_P00808320	na	na	na	na	na	na	na	na	0.00163	down	-2.93	na	9		TTTTTCAATGGTTCTTTTGTCGATGCCACCGCCTTTGTAGATCAGATGGCCAGTAGTGGT	lincRNA:chr2:107293518-107358418_F	lincRNA:chr2:107293518-107358418_F	lincRNA:chr2:107293518-107358418 forward strand
A_19_P00808348	0.02	down	-1.56	na	na	na	na	na	na	na	na	na	9		AATTAACAGTGCTTAAGTGTGAGGCTCCCTCAGAACATCAGAGATATCCTCACTCCCTCA	lincRNA:chr19:28268097-28296683_F	lincRNA:chr19:28268097-28296683_F	lincRNA:chr19:28268097-28296683 forward strand
A_19_P00808361	na	na	na	na	na	na	na	na	0.0242	up	2.52	na	9		GCTGAATTACAGGGGAATGTCCATCTGACATGAAGGACAATATTTCAATTTATGACTTTT	lincRNA:chr2:191367255-191373830_R	lincRNA:chr2:191367255-191373830_R	lincRNA:chr2:191367255-191373830 reverse strand
A_19_P00808362	na	na	na	na	0.0280712	up	1.3	na	na	na	na	na	9		CTTTGCTCTCTGCTTGTGAAGCATTGGGGATCAAGAACTTTTCCAAAAGAGACAATACAT	lincRNA:chr2:127290980-127318430_F	lincRNA:chr2:127290980-127318430_F	lincRNA:chr2:127290980-127318430 forward strand
A_19_P00808377	na	na	na	na	na	na	na	na	0.0258	down	-6.68	na	9		TCATAGTTGGAAAACTCACCATTGTATAGTGTCCCCATGGATCCCATGGCATCATCGAGT	lincRNA:chr4:13067152-13347902_F	lincRNA:chr4:13067152-13347902_F	lincRNA:chr4:13067152-13347902 forward strand
A_19_P00808379	na	na	na	na	na	na	na	na	0.0414	down	-1.7	na	9		CCCCAGCCCACTGATTCACCTGAGCCTGCTGTGAAGGTGAGCCAATGCTATAGCTTTAGT	lincRNA:chr13:52490949-52502949_F	lincRNA:chr13:52490949-52502949_F	lincRNA:chr13:52490949-52502949 forward strand
A_19_P00808733	na	na	na	na	na	na	na	na	0.00461	down	-4.21	na	9		TTAATTCACCGCAGGATGCCGCCCGCGCCTCGCCTTTAGGAAACATGAGATATCGCGAGA	lincRNA:chrX:53685100-53711400_F	lincRNA:chrX:53685100-53711400_F	lincRNA:chrX:53685100-53711400 forward strand
A_19_P00808758	na	na	na	na	na	na	na	na	0.0382	down	-1.25	na	9		TGGTTCCATTTCATACATGTTTGGAAAATAATCTGCAGAAATGAGCTGTGCTTGCAAGGA	lincRNA:chr13:85094849-85373549_F	lincRNA:chr13:85094849-85373549_F	lincRNA:chr13:85094849-85373549 forward strand
A_19_P00808852	na	na	na	na	na	na	na	na	0.0302	up	1.77	na	9		TTCATAAAGGTCTGCACTGTGCTCTTTTGACCTGTGTCTTCAAGCATGTGCTGTCATAAC	lincRNA:chr14:56036572-56044197_R	lincRNA:chr14:56036572-56044197_R	lincRNA:chr14:56036572-56044197 reverse strand
A_19_P00808865	0.00916	down	-1.4	na	na	na	na	na	0.00382	up	1.88	na	6		TATATCCGTGTATGTAAACCGCCTGTTGTCTAAACATATATCCGTGTATGTAAACCGCCT	lincRNA:chr21:44751672-44819297_R	lincRNA:chr21:44751672-44819297_R	lincRNA:chr21:44751672-44819297 reverse strand
A_19_P00808885	na	na	na	na	na	na	na	na	0.0294	down	-1.8	na	9		TTTGGATGCATCTGCTCAGACCACTTCTCATAAACACCATTCCAAATGATACTGGCTGCA	lincRNA:chr21:40541155-40546455_R	lincRNA:chr21:40541155-40546455_R	lincRNA:chr21:40541155-40546455 reverse strand
A_19_P00808893	na	na	na	na	0.0238013	down	-2.25	na	0.0369	down	-1.69	na	6		CTACTGATGTGGTCAGACCTGCTGCTGGTTTCCCATGCCATATAGCCGCAACTGCAAGGC	lincRNA:chr5:94005444-94012744_F	lincRNA:chr5:94005444-94012744_F	lincRNA:chr5:94005444-94012744 forward strand
A_19_P00808899	0.0153	down	-1.78	na	na	na	na	na	0.0347	up	1.55	na	6		ATATTAACTGAGTAACATCCTCCTGATGAGAAGTACTATATTAAATATAAACCCATTATG	lincRNA:chr7:112756783-112757127_R	lincRNA:chr7:112756783-112757127_R	lincRNA:chr7:112756783-112757127 reverse strand
A_19_P00808918	na	na	na	na	na	na	na	na	0.0337	down	-1.21	na	9		ACTTTCTCCATCTGCAGAAGGGGAGAGCAGTCTCCCTCCCCAGCACTGGGAACGGGCTGA	lincRNA:chr16:85249449-85584149_F	lincRNA:chr16:85249449-85584149_F	lincRNA:chr16:85249449-85584149 forward strand
A_19_P00809027	na	na	na	na	na	na	na	na	0.0313	down	-2.06	na	9		TGCTTGCTGATAAAACTGACTGCTCAAATGCTATTGCTGAATCTACAAGTCACTGATTAC	lincRNA:chrX:74764775-74914850_F	lincRNA:chrX:74764775-74914850_F	lincRNA:chrX:74764775-74914850 forward strand
A_19_P00809039	0.0107	down	-1.26	na	na	na	na	na	0.0354	up	1.3	na	6		TACTTTCACGCCGCTATTCTTTTCCTTTCTCCGTGATTGCTTGGCTAGCCATTTAAAAAA	hg18:lincRNA:chr2:239460050-239536125_F	hg18:lincRNA:chr2:239460050-239536125_F	hg18:lincRNA:chr2:239460050-239536125 forward strand
A_19_P00809076	na	na	na	na	na	na	na	na	0.00509	up	2.43	na	9		TAGAAGCCCCCTGGACAGCCTCCAAAAGAGAACTGTGAGAAAAGGTTCTTCAATCCTAAA	lincRNA:chr17:44271698-44279998_F	lincRNA:chr17:44271698-44279998_F	lincRNA:chr17:44271698-44279998 forward strand
A_19_P00809154	0.00454	down	-3.15	na	0.0221874	down	-1.67	na	0.0294	down	-1.47	na	3		TCAAACAGCTCCTCCCTCTGGGGCAGGGGGTGTGGGAGGAGAGGCCAGAGGCCAGAGGGC	lincRNA:chr1:27931263-27936288_F	lincRNA:chr1:27931263-27936288_F	lincRNA:chr1:27931263-27936288 forward strand
A_19_P00809217	na	na	na	na	na	na	na	na	0.0379	down	-2.48	na	9		TCCCTTGGGCCCTCTGTGAAAGGTAGACTGATCCTCGGTGAAGGCTTTGTTAAACCCAGC	lincRNA:chr6:14700246-14748171_R	lincRNA:chr6:14700246-14748171_R	lincRNA:chr6:14700246-14748171 reverse strand
A_19_P00809263	na	na	na	na	na	na	na	na	0.0228	down	-4.07	na	9		CGTCGTCCTCCGCCGTGAGCCGCTCCCGGTTGGGGAGCCGCTTGCGCCCCGATCCCTGGG	lincRNA:chr2:238532786-238566636_R	lincRNA:chr2:238532786-238566636_R	lincRNA:chr2:238532786-238566636 reverse strand
A_19_P00809294	0.0341	up	1.45	na	na	na	na	na	0.0386	down	-1.8	na	6		TTTCATCACAGGGAGGAAGCTCTTTGTGCTTGGCCAGCTTGACGGTGTCCACCCATCCAG	lincRNA:chr5:52531518-52727218_R	lincRNA:chr5:52531518-52727218_R	lincRNA:chr5:52531518-52727218 reverse strand
A_19_P00809313	na	na	na	na	na	na	na	na	0.0393	up	3.62	na	9		AGCCCATGGCCGCACTCAGGTTTTGCTTTTCACCTTCCCATCTGTGAAAGAGTGAGCAGG	lincRNA:chr11:65190190-65214674_F	lincRNA:chr11:65190190-65214674_F	lincRNA:chr11:65190190-65214674 forward strand
A_19_P00809400	na	na	na	na	na	na	na	na	0.0413	down	-2.2	na	9		TTTAAGATGTAAGTAGATTGTATCATCCCTAGCATAGCTGGTTCTCCTCTCCCTCTGCCC	lincRNA:chr18:10552875-10561233_R	lincRNA:chr18:10552875-10561233_R	lincRNA:chr18:10552875-10561233 reverse strand
A_19_P00809417	na	na	na	na	0.00847873	down	-2.51	na	na	na	na	na	9		AATGTTCTGCTTTCCTTGCCTTATGCCTGTACTTCACCTCAGCCTTCAATTCCATTGTGT	lincRNA:chr16:10479917-10481598_F	lincRNA:chr16:10479917-10481598_F	lincRNA:chr16:10479917-10481598 forward strand
A_19_P00809471	na	na	na	na	0.0493533	down	-2.23	na	0.0402	down	-1.55	na	6		TGATCCATTTTTTCCTAGTTACTGCACCTGGGAGCGACTGCCAGTACTACCACATCATTT	lincRNA:chr11:89926502-89932477_R	lincRNA:chr11:89926502-89932477_R	lincRNA:chr11:89926502-89932477 reverse strand
A_19_P00809519	na	na	na	na	0.0159997	up	1.61	na	na	na	na	na	9		CTTAGGGAACTCAACTGTGGCTGCTTCCTGGTCCTTCTTACACCCCCTAAATTGTCCAAC	lincRNA:chr22:18404600-18411525_R	lincRNA:chr22:18404600-18411525_R	lincRNA:chr22:18404600-18411525 reverse strand
A_19_P00809530	na	na	na	na	na	na	na	na	0.00274	down	-3.47	na	9		AAATAGTAGGTGAAGGCATCAGGCTGACCATCAATGCTCTCCACATCGTATTCATCTCCA	lincRNA:chr2:174685404-174756679_F	lincRNA:chr2:174685404-174756679_F	lincRNA:chr2:174685404-174756679 forward strand
A_19_P00809614	na	na	na	na	na	na	na	na	0.00768	up	2.83	na	9		TTCATATTTACACGAGAACCTAATATAACTGCCTTGTCTTTTTCAGGTAATAGCCTGCAG	lincRNA:chr11:65265824-65275174_F	lincRNA:chr11:65265824-65275174_F	lincRNA:chr11:65265824-65275174 forward strand
A_19_P00809622	na	na	na	na	na	na	na	na	0.0299	down	-3.11	na	9		TGCTTTGTAAATGGAAGTGTTTTTCAATAGTTGAATAGGTGGTGTGTGTGCTCTGTCTCT	lincRNA:chr8:86894834-86985059_F	lincRNA:chr8:86894834-86985059_F	lincRNA:chr8:86894834-86985059 forward strand
A_19_P00809656	na	na	na	na	0.0347299	up	2.02	na	na	na	na	na	9		CCCAGAAAGGTTCATTGTCTTCAAGCTCACAATACTATTTTGGGACAAACAGTTGTCTAG	lincRNA:chr7:45019225-45026725_R	lincRNA:chr7:45019225-45026725_R	lincRNA:chr7:45019225-45026725 reverse strand
A_19_P00809682	na	na	na	na	na	na	na	na	0.00207	down	-2.52	na	9		AGTGGTGGACTTGCCCGAATCTATGTGTCCAATGACGACAATGTTGGTATGAGTCTTTTC	lincRNA:chr2:107313487-107315124_F	lincRNA:chr2:107313487-107315124_F	lincRNA:chr2:107313487-107315124 forward strand
A_19_P00809688	na	na	na	na	na	na	na	na	0.00578	down	-1.32	na	9		GAGTGTCCCCGGTGTTGCATGGCTGGGAGGGTCCCCGGTGCTGCATGGCTGGGAGGGTCC	lincRNA:chr16:1430124-1444874_R	lincRNA:chr16:1430124-1444874_R	lincRNA:chr16:1430124-1444874 reverse strand
A_19_P00809692	na	na	na	na	0.0422572	down	-2.11	na	0.00467	down	-2.58	na	6		AATAAGCTCCTTGACCTCTGAGGGTTAGAAGTACTTCCTGCTGTGTGTTTTGGAATCCCT	lincRNA:chr3:9387975-9397375_F	lincRNA:chr3:9387975-9397375_F	lincRNA:chr3:9387975-9397375 forward strand
A_19_P00809697	na	na	na	na	na	na	na	na	0.00505	up	3.42	na	9		ATCTGAATTTACGCTCTGTAGCGTAACGAGAGGTCAATAAGATTAAACGGGGGCTCAGGA	lincRNA:chr1:852362-859037_R	lincRNA:chr1:852362-859037_R	lincRNA:chr1:852362-859037 reverse strand
A_19_P00809802	na	na	na	na	na	na	na	na	0.0366	down	-2.4	na	9		TGTCTAAGGCTTTGGCAGCTTTGCAAATTCCACATGCTAGGCCATTGTGGATGAGGGCGG	lincRNA:chr2:42070496-42083971_F	lincRNA:chr2:42070496-42083971_F	lincRNA:chr2:42070496-42083971 forward strand
A_19_P00809806	na	na	na	na	na	na	na	na	0.0385	down	-2.02	na	9		GTTATATAAAGAAGAGTGTTGGTGAATTCCAGCCTGGGAGAAAAGCACAAAGAACTCAAA	lincRNA:chrX:57927950-57934100_R	lincRNA:chrX:57927950-57934100_R	lincRNA:chrX:57927950-57934100 reverse strand
A_19_P00809830	na	na	na	na	na	na	na	na	0.0129	down	-2.64	na	9		AGGACACATGGCCCCAGGAACTTGTCTAAGAGGCAGTATAAGGGTCCAAGACCTTTACAG	lincRNA:chrX:73794800-73800175_R	lincRNA:chrX:73794800-73800175_R	lincRNA:chrX:73794800-73800175 reverse strand
A_19_P00809961	na	na	na	na	na	na	na	na	0.0039	down	-3.27	na	9		AAGAAGCAGAACTGGCTCCAGCAGCTCGTATTGTAGCATGCGCGGCTCAGTCATCTCCAG	lincRNA:chr19:20235918-20236352_R	lincRNA:chr19:20235918-20236352_R	lincRNA:chr19:20235918-20236352 reverse strand
A_19_P00809979	0.0105	up	2.69	na	na	na	na	na	0.00862	down	-5.24	na	6		ATTAACATCCCTTCTCCATGCCTCAGTCCCCATCATAAGGAGAAAGAGCCTGTCGTCCCT	lincRNA:chr16:83951024-83958049_F	lincRNA:chr16:83951024-83958049_F	lincRNA:chr16:83951024-83958049 forward strand
A_19_P00810045	na	na	na	na	0.0310276	down	-1.55	na	na	na	na	na	9		AAAGATCATGAAAGGGAACTATAAGCAGATTGTGAAGGCACACCAGGACAACCCCCATGA	lincRNA:chr2:224475831-224587681_F	lincRNA:chr2:224475831-224587681_F	lincRNA:chr2:224475831-224587681 forward strand
A_19_P00810083	na	na	na	na	na	na	na	na	0.0184	up	1.51	na	9		TCCACACGGGTGAGGGCACAGCCTTCTCGTCTCTTTCCTATGCTGCATCTTCAGAGCTAG	lincRNA:chr8:142126318-142135193_R	lincRNA:chr8:142126318-142135193_R	lincRNA:chr8:142126318-142135193 reverse strand
A_19_P00810156	na	na	na	na	na	na	na	na	0.00685	down	-1.66	na	9		TGTCTCTTGGTGGTTCCTTGAGGGCTTTGATGATCAGGGCAGAGGCAGAAGGCACCACCT	lincRNA:chr20:53691335-53691715_R	lincRNA:chr20:53691335-53691715_R	lincRNA:chr20:53691335-53691715 reverse strand
A_19_P00810174	na	na	na	na	na	na	na	na	0.0173	down	-3.61	na	9		CAGCCTGGGGTGGGATGCTGTGGGTCTGAAGAGAGGAGGCCAGGTAGATTTTCGTAAAAC	lincRNA:chr4:3297502-3310352_F	lincRNA:chr4:3297502-3310352_F	lincRNA:chr4:3297502-3310352 forward strand
A_19_P00810203	0.0406	up	1.18	na	na	na	na	na	na	na	na	na	9		ATGAATACGATGTGGAGAGCATTGATGGTCAGCCTGATGCCTTCACCTACTATTTGGATG	lincRNA:chr2:174685404-174756679_R	lincRNA:chr2:174685404-174756679_R	lincRNA:chr2:174685404-174756679 reverse strand
A_19_P00810205	0.00728	down	-1.48	na	0.00368745	down	-1.39	na	0.00483	down	-1.46	na	3		ATGATGCATTATCATCCTTCTAAGGCAGCAACAGCTGCTTCCTGCTTGTCTCAGAAGGTT	lincRNA:chr7:7928975-7996750_R	lincRNA:chr7:7928975-7996750_R	lincRNA:chr7:7928975-7996750 reverse strand
A_19_P00810280	na	na	na	na	na	na	na	na	0.03	down	-1.94	na	9		AGTTCTTCTCCTCTCTTTCCTCCCTCCCCACTCCCCATCATACACTGTACCATAACCTCT	lincRNA:chr5:71679069-71688944_F	lincRNA:chr5:71679069-71688944_F	lincRNA:chr5:71679069-71688944 forward strand
A_19_P00810333	na	na	na	na	0.00219419	up	2.11	na	0.0244	up	2.53	na	6		TGAAGGGGGTATTGGACAATGATATTCCTGTGCCTCGAGTGGAAAGTCTCTCAGGAGATA	lincRNA:chr1:201482952-201545677_F	lincRNA:chr1:201482952-201545677_F	lincRNA:chr1:201482952-201545677 forward strand
A_19_P00810361	na	na	na	na	na	na	na	na	0.0137	down	-1.49	na	9		TGATTCCAAGAACAAGTATTTGCTTCCAGTATGAAGTGTCAGCAGTTCACAATCTTCAAC	lincRNA:chr5:66985594-66997719_R	lincRNA:chr5:66985594-66997719_R	lincRNA:chr5:66985594-66997719 reverse strand
A_19_P00810365	na	na	na	na	na	na	na	na	0.0183	down	-1.66	na	9		ATACTCTGGTATCAACTCATCACAGCTGTCCATGATGAACACACGGCGGACATACAGTTT	lincRNA:chr4:88778926-88869076_R	lincRNA:chr4:88778926-88869076_R	lincRNA:chr4:88778926-88869076 reverse strand
A_19_P00810374	na	na	na	na	na	na	na	na	0.0174	down	-1.66	na	9		TTTTTCACAGTTAGGTGGGCACCTGGTCTTTGAGAACCTTCTCTTGAGATAGCCCTCTTT	lincRNA:chr2:63971721-64004071_F	lincRNA:chr2:63971721-64004071_F	lincRNA:chr2:63971721-64004071 forward strand
A_19_P00810426	na	na	na	na	0.0424657	down	-1.76	na	na	na	na	na	9		GTTGCCTGGAGCCAGTCCACATCTGAGCCATGGGAGGTCACAAGAAATGTGAGTTGGGAG	lincRNA:chr12:4802364-4808389_F	lincRNA:chr12:4802364-4808389_F	lincRNA:chr12:4802364-4808389 forward strand
A_19_P00810604	na	na	na	na	na	na	na	na	0.0219	down	-1.16	na	9		GGTAGGTAATTAATGCAGTAAGAACTCTTCCCTCTGTGTTTATTAGATGCAAAGAAGAAT	lincRNA:chr1:142803013-142804254_R	lincRNA:chr1:142803013-142804254_R	lincRNA:chr1:142803013-142804254 reverse strand
A_19_P00810669	na	na	na	na	na	na	na	na	0.0103	down	-2.17	na	9		TACTCAGAGGTACCCTGGACCTCCACCCTCTCCCTGCATCAAGGTGACAGATTCTGGCAT	lincRNA:chr2:120443455-120452280_F	lincRNA:chr2:120443455-120452280_F	lincRNA:chr2:120443455-120452280 forward strand
A_19_P00810673	na	na	na	na	0.0309295	down	-1.85	na	na	na	na	na	9		AGTCACGCAGAAGTTTCTCTTTCGCTCTTCGCGCTACACACCCAGATTGGCTTCCAGCGC	lincRNA:chr2:157192429-157198954_F	lincRNA:chr2:157192429-157198954_F	lincRNA:chr2:157192429-157198954 forward strand
A_19_P00810799	na	na	na	na	na	na	na	na	0.0406	down	-2.51	na	9		GAATGGCCACACAAGGGTTCAGCTGTCTCTTTTAATCAATGAAATCGACGTATCCATGAA	lincRNA:chr10:19930169-20099994_F	lincRNA:chr10:19930169-20099994_F	lincRNA:chr10:19930169-20099994 forward strand
A_19_P00810872	na	na	na	na	0.0372267	down	-3.32	na	0.0135	down	-2.48	na	6		TTATAACTACACTCATGCTTCTAACTGGATTACCACTTTCCCTCTACAACTACTCATATT	lincRNA:chr10:76476369-76482494_F	lincRNA:chr10:76476369-76482494_F	lincRNA:chr10:76476369-76482494 forward strand
A_19_P00810888	na	na	na	na	na	na	na	na	0.0227	down	-2.01	na	9		ATGTAATGCTGCTATCATTTTCAATTGCTCTCCCAATAAAACAGGCCCTGGAGCCGAGGT	lincRNA:chr12:124570307-124573144_F	lincRNA:chr12:124570307-124573144_F	lincRNA:chr12:124570307-124573144 forward strand
A_19_P00810899	0.0147	up	1.69	na	0.00600153	up	2.1	na	0.0421	down	-1.32	na	3		CTCTGCATGCTTGTCTTTAGAGGAAGGAAATGTATTAATTGCCCAAAGTAATATATTGTG	lincRNA:chr17:75085130-75104530_F	lincRNA:chr17:75085130-75104530_F	lincRNA:chr17:75085130-75104530 forward strand
A_19_P00810976	na	na	na	na	0.00462898	up	3.26	na	na	na	na	na	9		TTCCTGGACACACCCAAGCAGAGGAAATCATGCCTCTCTTTGTGCTATTTTTAGCACTTA	lincRNA:chr1:159932201-159959351_F	lincRNA:chr1:159932201-159959351_F	lincRNA:chr1:159932201-159959351 forward strand
A_19_P00811075	na	na	na	na	0.0280712	up	3.66	na	0.0376	up	3.12	na	6		GGGAAACAGGGCCTAGTTTCTGAACTTTCCCTGGTCACCTCAGCACAGTAATCGAGGAAC	lincRNA:chr9:14585325-14597525_F	lincRNA:chr9:14585325-14597525_F	lincRNA:chr9:14585325-14597525 forward strand
A_19_P00811178	0.0299	up	1.94	na	na	na	na	na	na	na	na	na	9		TGGGAAATGTTTTATGATCTGTAAGTCCAAGGAATCCTCTCCCACCATTTCTTTCCCCCC	lincRNA:chrX:133675909-133683184_R	lincRNA:chrX:133675909-133683184_R	lincRNA:chrX:133675909-133683184 reverse strand
A_19_P00811181	na	na	na	na	na	na	na	na	0.0201	down	-4.91	na	9		TGAAGTTTGAGAACCTCTGCAAGGTCATGAAATAAACCTTAGGAGGTTTTAGAAAGTGGC	lincRNA:chr10:9645119-9926744_R	lincRNA:chr10:9645119-9926744_R	lincRNA:chr10:9645119-9926744 reverse strand
A_19_P00811226	na	na	na	na	na	na	na	na	0.00449	down	-2.01	na	9		TTTCAGCTCTTTACCACTGTCCAACTTTGAAGGGTCTGTCAGGCTCTCATAGCGAATCTT	lincRNA:chr4:88778926-88869076_R	lincRNA:chr4:88778926-88869076_R	lincRNA:chr4:88778926-88869076 reverse strand
A_19_P00811284	na	na	na	na	0.000781378	down	-1.68	na	na	na	na	na	9		TTATTGGCTGAATCTGCCTTGGAGCACTCCTGGTTTTATATAGTAGCCAAAGGTTTTGTT	lincRNA:chr8:61797446-62065596_R	lincRNA:chr8:61797446-62065596_R	lincRNA:chr8:61797446-62065596 reverse strand
A_19_P00811365	na	na	na	na	na	na	na	na	0.0244	down	-1.68	na	9		CCCTGTCCCCCTGTTTTGTTATATTTTTATCCAAAGACAGAGCTTAGGTTTGAGTTTTCC	lincRNA:chr13:48380599-48492024_R	lincRNA:chr13:48380599-48492024_R	lincRNA:chr13:48380599-48492024 reverse strand
A_19_P00811386	na	na	na	na	na	na	na	na	0.0186	down	-1.95	na	9		AATCTCACATTTCTCTTTTTCTGTGTTGAAGATCGCACCTTCCTGGTGTCTGGGCTTCCA	lincRNA:chr6:14796596-15118246_F	lincRNA:chr6:14796596-15118246_F	lincRNA:chr6:14796596-15118246 forward strand
A_19_P00811420	0.0314	up	2.33	na	0.0309295	down	-1.44	na	0.0044	down	-3.07	na	3		TGTTTTCTAGCCTGGGGTGGATGGGGAGACACGGAGGGCAACTCAGGAAACAAGCTGACT	lincRNA:chr21:15443204-15457462_F	lincRNA:chr21:15443204-15457462_F	lincRNA:chr21:15443204-15457462 forward strand
A_19_P00811429	na	na	na	na	na	na	na	na	0.0277	down	-2.02	na	9		TGGATGAGGGCGGTCTTCAGCACCTCTTGTAAAGCAGTATTAACGTCCATTACACCTCCA	lincRNA:chr2:42076869-42077718_F	lincRNA:chr2:42076869-42077718_F	lincRNA:chr2:42076869-42077718 forward strand
A_19_P00811581	na	na	na	na	0.0054884	down	-1.81	na	na	na	na	na	9		TCCATGTCGTCCCAGTTGGTGACGATGCCATGCTCAATGGGGTACTTCAGGGTCAGGATG	lincRNA:chr1:238071752-238099277_R	lincRNA:chr1:238071752-238099277_R	lincRNA:chr1:238071752-238099277 reverse strand
A_19_P00811688	0.0147	down	-3	na	na	na	na	na	na	na	na	na	9		TCCTGCTTTGGGGAATGTATGGGCAGCTTCTTGCCTGTAGTTGGAGGGTTAGAGAGAGGG	lincRNA:chr1:9208086-9209181_R	lincRNA:chr1:9208086-9209181_R	lincRNA:chr1:9208086-9209181 reverse strand
A_19_P00811747	na	na	na	na	na	na	na	na	0.0348	down	-1.66	na	9		TGACTGAACCGCGGTCCCAGCTGCCACTACTGCGAAGATGGAGTCGAGAAAGAGGAAGAA	lincRNA:chr18:72053420-72059470_F	lincRNA:chr18:72053420-72059470_F	lincRNA:chr18:72053420-72059470 forward strand
A_19_P00811927	na	na	na	na	na	na	na	na	0.017	down	-1.39	na	9		TACATAATCCTTCCATTCTTCACCCAGAGCATCAGCAGCTACTTCTGTGGCCATGTGCTT	lincRNA:chr2:179760655-179914805_R	lincRNA:chr2:179760655-179914805_R	lincRNA:chr2:179760655-179914805 reverse strand
A_19_P00811935	na	na	na	na	na	na	na	na	0.0459	down	-1.39	na	9		CTGCATCACCTCGTACACGGTGTCGCAAGAGACTTTGCTGCTCATGGCTTCTCACACTGA	lincRNA:chr1:81641612-81722187_R	lincRNA:chr1:81641612-81722187_R	lincRNA:chr1:81641612-81722187 reverse strand
A_19_P00811945	0.0415	up	4.51	na	na	na	na	na	na	na	na	na	9		TCAAATACTGAAAGCTTCCAGAAAGCAGCAGACAGGTGTTCCTCACAATCTGACACAGAC	lincRNA:chr7:130528285-130800860_R	lincRNA:chr7:130528285-130800860_R	lincRNA:chr7:130528285-130800860 reverse strand
A_19_P00812008	na	na	na	na	na	na	na	na	0.0217	down	-2	na	9		ATGCTTCTCCTGCCTGTGTCCTAGAGATACTGTAGATGTTCTTGATGCAAGGCCTATGTT	lincRNA:chr7:96265914-96310814_F	lincRNA:chr7:96265914-96310814_F	lincRNA:chr7:96265914-96310814 forward strand
A_19_P00812033	na	na	na	na	na	na	na	na	0.0285	down	-5.77	na	9		CTCAGAGGAGGAGTATTCCACCAAAGAAGAGAAATATGAAAAGGAGATGAAACTGCTGGA	lincRNA:chr5:163123647-163140922_R	lincRNA:chr5:163123647-163140922_R	lincRNA:chr5:163123647-163140922 reverse strand
A_19_P00812044	0.00143	down	-1.76	na	na	na	na	na	0.0224	up	1.24	na	6		AGAGGGCTCTGCTCCAAGTCATTGCTTACTACACCCACAAACATTCTTCGTTCTTTAAGG	lincRNA:chr20:3850525-3857650_F	lincRNA:chr20:3850525-3857650_F	lincRNA:chr20:3850525-3857650 forward strand
A_19_P00812095	na	na	na	na	na	na	na	na	0.0301	up	4.98	na	9		AATGTCTTTGTCAAGAATACTTCCCAGATGGTGTGTGTACCTCAGCTGCAGGACCCTTAT	lincRNA:chr6:3899696-3900109_R	lincRNA:chr6:3899696-3900109_R	lincRNA:chr6:3899696-3900109 reverse strand
A_19_P00812120	na	na	na	na	0.0280393	up	2.65	na	0.0051	up	2.45	na	6		CTAATTATGCTTTCATTGTCTATTCTGTGTGGTTATGTTACTTGCTGAAATTAATACATA	lincRNA:chr15:50648133-50663574_F	lincRNA:chr15:50648133-50663574_F	lincRNA:chr15:50648133-50663574 forward strand
A_19_P00812135	na	na	na	na	0.00159654	down	-1.92	na	0.00206	up	5.17	na	6		CTTTATCTTGTTGATCGGAAGTCTGCCAGCCCAATTTATGATGGAACATAAGATCTCTAA	lincRNA:chr1:852362-859037_R	lincRNA:chr1:852362-859037_R	lincRNA:chr1:852362-859037 reverse strand
A_19_P00812151	na	na	na	na	na	na	na	na	0.0119	up	1.96	na	9		TCTTTCCGGCATCAGTGTGGACATTGACCCCACTGGACTGCAGTCACAGTGGACTCCCAA	lincRNA:chr22:24023325-24029500_R	lincRNA:chr22:24023325-24029500_R	lincRNA:chr22:24023325-24029500 reverse strand
A_19_P00812185	na	na	na	na	na	na	na	na	0.00366	up	3.39	na	9		GAAGCACGCACTGGCTGCCGCGGGAAAAGCTCAGCCAGCAACTGTATCAGCTTTACATTC	lincRNA:chr5:108061301-108067051_F	lincRNA:chr5:108061301-108067051_F	lincRNA:chr5:108061301-108067051 forward strand
A_19_P00812215	na	na	na	na	na	na	na	na	0.0218	down	-1.52	na	9		CTGAGAGAATAGTCAAGCTACACAGAATAGGTAATTTCATTGATGTGAGTGAGGGCCCTC	lincRNA:chr5:66985594-66997719_R	lincRNA:chr5:66985594-66997719_R	lincRNA:chr5:66985594-66997719 reverse strand
A_19_P00812229	na	na	na	na	na	na	na	na	0.00442	down	-1.74	na	9		ACGGCAGTGACCCAGACCATGCCCCCAGAACTGCAGGACATAAAGAGCTGCATGAACAGA	lincRNA:chr11:74740852-74747502_F	lincRNA:chr11:74740852-74747502_F	lincRNA:chr11:74740852-74747502 forward strand
A_19_P00812256	na	na	na	na	na	na	na	na	0.00768	up	1.4	na	9		ACATGGCCACAGAAGTAGCTGCTGATGCTCTGGGTGAAGAATGGAAGGATTATGTAGTCC	lincRNA:chr2:179760655-179914805_F	lincRNA:chr2:179760655-179914805_F	lincRNA:chr2:179760655-179914805 forward strand
A_19_P00812282	na	na	na	na	0.00984525	up	1.28	na	na	na	na	na	9		CAGCGGGCGGGTCGGTCTCGGCTGCTTCACCGGGTTATTTTATAAAAGAGGAAGAAAAAA	lincRNA:chr3:154957056-155055681_F	lincRNA:chr3:154957056-155055681_F	lincRNA:chr3:154957056-155055681 forward strand
A_19_P00812318	na	na	na	na	na	na	na	na	0.032	down	-1.83	na	9		ATGTTACCGCCAGATACATCAGATAGGAGCGAAAGACTTAATATTGCTCATCAGCGTTAG	lincRNA:chr1:173831852-173837202_F	lincRNA:chr1:173831852-173837202_F	lincRNA:chr1:173831852-173837202 forward strand
A_19_P00812340	na	na	na	na	0.00127995	up	2.73	na	0.00348	up	1.88	na	6		TCACTTCCTAGATGAGGAAGTTAAACTCATCAAGAAGATGGGTGACCACCTGACCAACCT	lincRNA:chr7:45983575-46089425_R	lincRNA:chr7:45983575-46089425_R	lincRNA:chr7:45983575-46089425 reverse strand
A_19_P00812381	na	na	na	na	na	na	na	na	0.0267	up	1.29	na	9		ACCTTCTACTATGTCTTGCCTCCACCCTTAGTTTGTAGCCCATTTGCAGTGCTGAAATGA	lincRNA:chr3:112514535-112524835_F	lincRNA:chr3:112514535-112524835_F	lincRNA:chr3:112514535-112524835 forward strand
A_19_P00812553	na	na	na	na	na	na	na	na	0.000148	down	-1.73	na	9		AGTGGTTCCATTACCAGAAAAACTTAATGAGATTTCTCTGGAATACAAGCTGATATTGCT	lincRNA:chr3:17904246-18167346_R	lincRNA:chr3:17904246-18167346_R	lincRNA:chr3:17904246-18167346 reverse strand
A_19_P00812573	na	na	na	na	na	na	na	na	0.00576	down	-2.83	na	9		TTTCAGTTTATGTAAGACCCAGGCATACTTGAAAAAGCCCTTTCCCATCTCAGCAGCGTC	lincRNA:chrX:97546119-97657219_R	lincRNA:chrX:97546119-97657219_R	lincRNA:chrX:97546119-97657219 reverse strand
A_19_P00812592	na	na	na	na	na	na	na	na	0.0265	up	8.81	na	9		CTAGGTTCAGGTCAACATGAGGGTGACCATCGCCAGGGTCAGTGCATTTGGTAGGAGACC	lincRNA:chr6:3902502-3903380_R	lincRNA:chr6:3902502-3903380_R	lincRNA:chr6:3902502-3903380 reverse strand
A_19_P00812608	na	na	na	na	na	na	na	na	0.00813	down	-1.79	na	9		TCACTTGTGGGGGTCTCTGTGCTGGACGGCTGTACCTCTCATGAAATGGACAACTGACCA	lincRNA:chr6:2469151-2539476_F	lincRNA:chr6:2469151-2539476_F	lincRNA:chr6:2469151-2539476 forward strand
A_19_P00812669	na	na	na	na	na	na	na	na	0.0122	down	-1.96	na	9		GGCTTTCTTATGCCTTCTTGTGTCCTGTCCAGACTTCTCATGGAGTAACTTTTGTTTCTT	lincRNA:chr8:138331518-138433693_R	lincRNA:chr8:138331518-138433693_R	lincRNA:chr8:138331518-138433693 reverse strand
A_19_P00812716	0.0156	up	56.04	na	na	na	na	na	0.0247	down	-20.14	na	6		TGATAACTGTTAAATATAAATGTGAGAATCTCTGACTATGCCTAGGTATTTGTATTTTAT	lincRNA:chr3:112364535-112374635_F	lincRNA:chr3:112364535-112374635_F	lincRNA:chr3:112364535-112374635 forward strand
A_19_P00812742	na	na	na	na	na	na	na	na	0.0197	up	1.44	na	9		TTGACCGCCTTTTCTTCTCGGGCCAAGAACTGTGGCAGTGCAGAAATTACAATTAAAAAA	lincRNA:chr9:14316575-14324575_R	lincRNA:chr9:14316575-14324575_R	lincRNA:chr9:14316575-14324575 reverse strand
A_19_P00812821	na	na	na	na	na	na	na	na	0.0054	down	-2.19	na	9		AATGCAGGGAGGACTCTGGGGCAGGGGCAAATCACTGTCAATGTTCAGCTTCAGTGCTGG	lincRNA:chr4:8352025-8359075_F	lincRNA:chr4:8352025-8359075_F	lincRNA:chr4:8352025-8359075 forward strand
A_19_P00812901	na	na	na	na	na	na	na	na	0.023	down	-1.65	na	9		AGGTCAGCTAAATAAGCTGTTGGGCCCATACCCCAAAAATGTTGGTTACACCCTTCCCAT	lincRNA:chr8:32772708-32913758_F	lincRNA:chr8:32772708-32913758_F	lincRNA:chr8:32772708-32913758 forward strand
A_19_P00812911	0.0182	up	1.51	na	na	na	na	na	0.00743	up	2.14	na	6		GCATGATGAGGCAGCTGAGGTGGCTCGCTTTCTCCTCCACCCCAGAAAATAAAGTCATAT	lincRNA:chr1:37917588-37923413_R	lincRNA:chr1:37917588-37923413_R	lincRNA:chr1:37917588-37923413 reverse strand
A_19_P00812930	na	na	na	na	na	na	na	na	0.0244	down	-2.07	na	9		CCCCAAGCCCGTCTCCCCTTACCTCCTCGGCCCAGCGCCTACCTCCCCGAATCGCGGCCG	lincRNA:chr5:149866432-149882132_R	lincRNA:chr5:149866432-149882132_R	lincRNA:chr5:149866432-149882132 reverse strand
A_19_P00812941	0.0256	up	2.24	na	na	na	na	na	na	na	na	na	9		AAGGACCTGCCAGAGACTGGGAGTGTTGACTGCTGCAAGGACCAAGGTGGGAATTGCTGT	lincRNA:chr4:108746776-108807351_F	lincRNA:chr4:108746776-108807351_F	lincRNA:chr4:108746776-108807351 forward strand
A_19_P00812965	na	na	na	na	0.0301484	down	-2.28	na	0.0375	down	-1.19	na	6		TTGAAACAAGTGGCTTCTGTCTTGGCAGTGGTGGTTTAAAAAGCAAGAGTGCTACAGCCA	lincRNA:chrX:106895444-106901544_F	lincRNA:chrX:106895444-106901544_F	lincRNA:chrX:106895444-106901544 forward strand
A_19_P00813004	na	na	na	na	na	na	na	na	0.033	down	-2.34	na	9		ATTTTCACAGAGACGAGGCCAGGAAGGGAGATTGTCCCTGTGGGTCTGTCCCGGAAGAGA	lincRNA:chr16:85157274-85184499_R	lincRNA:chr16:85157274-85184499_R	lincRNA:chr16:85157274-85184499 reverse strand
A_19_P00813006	na	na	na	na	0.0157506	down	-1.68	na	0.0331	down	-1.58	na	6		TCACTGCTCTAGCTCCTGTGGCACTGCACGGACACGTGGTTGCTACAAGTTAGTACGCAT	lincRNA:chr4:53578624-53580302_R	lincRNA:chr4:53578624-53580302_R	lincRNA:chr4:53578624-53580302 reverse strand
A_19_P00813076	na	na	na	na	0.0450663	up	1.34	na	na	na	na	na	9		CTTGGCTGCGACTGTGTGCCTGCAGGCCCCATGCCCGGTATCCGGTGGATGCGAGTGCTA	lincRNA:chr19:28296773-28297062_F	lincRNA:chr19:28296773-28297062_F	lincRNA:chr19:28296773-28297062 forward strand
A_19_P00813140	na	na	na	na	na	na	na	na	0.0224	up	2.15	na	9		GCTGTGCCCAGTGGGATGTTGTCAGAGAATGGACCTGGCTGCTGGGAAAGGTGATTGTGT	lincRNA:chr21:44888047-44899522_R	lincRNA:chr21:44888047-44899522_R	lincRNA:chr21:44888047-44899522 reverse strand
A_19_P00813208	na	na	na	na	na	na	na	na	0.0315	down	-1.99	na	9		CGGCCACGAGCAGCGCCGCGGGTCGCCCCGCCCAGACCTCCGCGCCCGGAGCTCAGGCTC	lincRNA:chr8:26294083-26309833_R	lincRNA:chr8:26294083-26309833_R	lincRNA:chr8:26294083-26309833 reverse strand
A_19_P00813242	na	na	na	na	0.0440476	up	1.48	na	na	na	na	na	9		ATTAGGGTTGAACTTCGGTGGCATGGTGGAGGCGGCTGGTGTCAGATGAACCTGGATTTG	lincRNA:chr12:31984858-32106908_R	lincRNA:chr12:31984858-32106908_R	lincRNA:chr12:31984858-32106908 reverse strand
A_19_P00813467	na	na	na	na	na	na	na	na	0.00245	down	-4.19	na	9		GATTGTAGGATTTGTTGCTGATTTTGACCTTGTACTGAAGTTAAATGTTCCCTTGGTATT	lincRNA:chr15:83394246-83408191_R	lincRNA:chr15:83394246-83408191_R	lincRNA:chr15:83394246-83408191 reverse strand
A_19_P00813474	na	na	na	na	0.00316847	down	-1.57	na	0.011	up	1.54	na	6		TGTTTTGCTTTGGATCTTGGCGTTCTTCTAGAGAACTCATCTGCTCAGGAGCTTCTCAGT	lincRNA:chr3:47207196-47217796_F	lincRNA:chr3:47207196-47217796_F	lincRNA:chr3:47207196-47217796 forward strand
A_23_P100022	na	na	na	na	0.0360533	down	-14.89	SV2B	0.0235	down	-19.21	SV2B	4	ref|NM_014848|ref|NM_001167580|gb|BC030011|ens|ENST00000330276	ATGTCGGCTGTGGAGGGTTAAAGGGATGAGGCTTTCCTTTGTTTAGCAAATCTGTTCACA	SV2B	NM_014848	ref|Homo sapiens synaptic vesicle glycoprotein 2B (SV2B), transcript variant 1, mRNA [NM_014848]
A_23_P100074	na	na	na	na	0.00080601	up	2.48	AVEN	0.0323	down	-1.23	AVEN	4	ref|NM_020371|ens|ENST00000306730|gb|CR618548|gb|CR619789	GACCAGCCAGTTTACAAGCATGTCTCAAGCTAGTGTGTTCCATTATGCTCACAGCAGTAA	AVEN	NM_020371	ref|Homo sapiens apoptosis, caspase activation inhibitor (AVEN), mRNA [NM_020371]
A_23_P100196	na	na	na	na	0.0220233	up	1.45	USP10	0.0303	down	-1.57	USP10	4	ref|NM_005153|gb|CR749515|ens|ENST00000219473|ens|ENST00000397953	TTGGGGTTCGTGCACAACACAGCTTCTGTTGACTCTAACTTCCAAATCAAAATCATTTGG	USP10	NM_005153	ref|Homo sapiens ubiquitin specific peptidase 10 (USP10), mRNA [NM_005153]
A_23_P100203	0.0278	down	-1.13	HSBP1	0.019926	down	-1.89	HSBP1	na	na	na	na	4	ref|NM_001537|ens|ENST00000433866|gb|CR626052|gb|CR608180	ACAAATTACATGGGGAACATAAAGGAGTGAGATCCTTCTGTGATAAAATGAATTCACCAC	HSBP1	NM_001537	ref|Homo sapiens heat shock factor binding protein 1 (HSBP1), mRNA [NM_001537]
A_23_P100220	0.00256	down	-1.37	ESRP2	na	na	na	na	0.00284	down	-1.46	ESRP2	4	ref|NM_024939|gb|AK025571|gb|BC030146|gb|BC052309	CTCAACTGCTGGCTCTTCTTCCCTTTGTATTTGTGTAAGGAGCACTGCACTCCCATAAAA	ESRP2	NM_024939	ref|Homo sapiens epithelial splicing regulatory protein 2 (ESRP2), mRNA [NM_024939]
A_23_P100240	na	na	na	na	na	na	na	na	0.0175	up	5.7	CDH16	8	ref|NM_004062|gb|AY358911|gb|AK225544|ens|ENST00000299752	GGGAGTGCTCCAAATGTCAGGGTGTTTGCCCAATAATAAAGCCCCAGAGAACTGGGCTGG	CDH16	NM_004062	ref|Homo sapiens cadherin 16, KSP-cadherin (CDH16), mRNA [NM_004062]
A_23_P100292	na	na	na	na	na	na	na	na	0.0063	up	1.47	LOC645937	8	gb|BC010990|gb|AK024487|gb|BC010243|gb|BC029270	TGAATCTTTTTATGAGACAAGCTGAATCTGGGATCTCAAATTGCCTCTGACCTTTTATAA	ZNF598	BC010990	gb|Homo sapiens zinc finger protein 598, mRNA (cDNA clone IMAGE:3939824), partial cds. [BC010990]
A_23_P100315	na	na	na	na	na	na	na	na	0.00855	up	1.5	DECR2	8	ref|NM_020664|gb|AK055839|gb|CR597611|gb|AK225961	CATGGATCCCGAGACTTGTGTTCTCTTGGCTGAAAACACTGAGGTGCTCCCATCTGTGCG	DECR2	NM_020664	ref|Homo sapiens 2,4-dienoyl CoA reductase 2, peroxisomal (DECR2), mRNA [NM_020664]
A_23_P100344	0.027	up	1.33	ORC6L	na	na	na	na	na	na	na	na	8	ref|NM_014321|ens|ENST00000219097|gb|BC050725|gb|CR619046	ACATTCCAAACTGATAGTACATTGCCATCTCCAGGAAGACTTGACGGCTTTGGGATTTTG	ORC6L	NM_014321	ref|Homo sapiens origin recognition complex, subunit 6 like (yeast) (ORC6L), mRNA [NM_014321]
A_23_P100486	na	na	na	na	0.0153053	down	-1.48	VKORC1	na	na	na	na	8	ref|NM_206824|ref|NM_024006|gb|AF176924|ens|ENST00000319788	GACCTCATCTGCTTTGCTTTGGCATGTGAGCCTTGCCTAAGGGGGCATATCTGGGTCCCT	VKORC1	NM_206824	ref|Homo sapiens vitamin K epoxide reductase complex, subunit 1 (VKORC1), transcript variant 2, mRNA [NM_206824]
A_23_P100501	na	na	na	na	0.0488965	down	-1.46	HMOX2	na	na	na	na	8	ref|NM_002134|ref|NM_001127204|ref|NM_001127205|ref|NM_001127206	CTAGCTGCTGGACTCTTGGCCTGGTACTACATGTGAAGCACCCATCATGCCACACCGGTA	HMOX2	NM_002134	ref|Homo sapiens heme oxygenase (decycling) 2 (HMOX2), transcript variant 3, mRNA [NM_002134]
A_23_P100539	na	na	na	na	na	na	na	na	0.0127	up	2.66	ABCC6	8	ref|NM_001171|gb|CR609146|ens|ENST00000456970|ens|ENST00000205558	TCATCGATAGCTCCACACGATATTGAGTCTAGACCTGTGTTTGCTCTCTGGGAGGAAAAT	ABCC6	NM_001171	ref|Homo sapiens ATP-binding cassette, sub-family C (CFTR/MRP), member 6 (ABCC6), transcript variant 1, mRNA [NM_001171]
A_23_P100602	na	na	na	na	0.0453607	down	-1.47	TBCD	na	na	na	na	8	ref|NM_005993|gb|CR593345|gb|AF193042|gb|AJ006417	AAGTTGCTTGCGCTCTGTAAGAAAGAAATCAAGAATTCAAAAGATATCCAGAAGCTCCTG	TBCD	NM_005993	ref|Homo sapiens tubulin folding cofactor D (TBCD), mRNA [NM_005993]
A_23_P100632	na	na	na	na	na	na	na	na	0.0286	down	-1.29	HN1	8	ref|NM_001002033|ref|NM_016185|ref|NM_001002032|gb|CR613024	TTCCTCCATGCTTGTGAACTGCACAACTTGAGCCTGACTGTACATCTCTTGGATTTGTTT	HN1	NM_001002033	ref|Homo sapiens hematological and neurological expressed 1 (HN1), transcript variant 3, mRNA [NM_001002033]
A_23_P100654	0.00483	down	-1.64	ZBTB4	na	na	na	na	na	na	na	na	8	ref|NM_020899|ref|NM_001128833|ens|ENST00000380599|ens|ENST00000311403	GTATTTGAGCTGGGGAATTTGAATATTGTGAGTTTCAGATGTTGGAAATTTGGGATTTTG	ZBTB4	NM_020899	ref|Homo sapiens zinc finger and BTB domain containing 4 (ZBTB4), transcript variant 1, mRNA [NM_020899]
A_23_P100676	na	na	na	na	na	na	na	na	0.0319	up	1.37	SMG6	8	ref|NM_017575|ref|NM_001170957|ens|ENST00000263073|ens|ENST00000354901	AGCTGGTACCTCAGTGGGGAGGCTTCCTTACCAAGAATGAGTTCCTGAAACCCAGGGCCA	SMG6	NM_017575	ref|Homo sapiens Smg-6 homolog, nonsense mediated mRNA decay factor (C. elegans) (SMG6), transcript variant 1, mRNA [NM_017575]
A_23_P100711	0.0482	up	1.15	PMP22	na	na	na	na	na	na	na	na	8	ref|NM_000304|ref|NM_153322|ref|NM_153321|ens|ENST00000426385	TGTGCCTCCAAGGACTGTCTGGCAATGACTTGTATTGGCCACCAACTGTAGATGTATATA	PMP22	NM_000304	ref|Homo sapiens peripheral myelin protein 22 (PMP22), transcript variant 1, mRNA [NM_000304]
A_23_P10077	na	na	na	na	na	na	na	na	0.0328	up	2.21	PNPLA2	8	ref|NM_020376|gb|AL833707|ens|ENST00000336615|gb|AJ278476	CGCCTCCATTACCACTGCGCAGTGAGATGAGGGGACTCACAGTTGCCAAGAGGGGTCTTT	PNPLA2	NM_020376	ref|Homo sapiens patatin-like phospholipase domain containing 2 (PNPLA2), mRNA [NM_020376]
A_23_P100868	na	na	na	na	0.0068055	up	1.45	MYO19	na	na	na	na	8	ref|NM_001033580|gb|AK026518|thc|THC2475732	AAGGTACCGCATGATCAGAAGAGAGAACTAGTGCTACCGCCTTGCTTGTCTAGTACATTA	MYO19	NM_001033580	ref|Homo sapiens myosin XIX (MYO19), transcript variant 3, mRNA [NM_001033580]
A_23_P101013	na	na	na	na	na	na	na	na	0.000483	up	2.83	TMC6	8	ref|NM_007267|ref|NM_001127198|gb|DQ104440|gb|AK310734	CAGATCAGCAATGAGGGTGAGGACAAAATCTTCTTAATCAACAAGCTTCACTCCATCTAC	TMC6	NM_007267	ref|Homo sapiens transmembrane channel-like 6 (TMC6), transcript variant 2, mRNA [NM_007267]
A_23_P101054	0.000169	up	9.17	KRT34	na	na	na	na	0.00232	up	1.26	KRT34	4	ref|NM_021013|ens|ENST00000251648|ens|ENST00000394001|gb|BC041070	GATGTTCAGCTCCCTGTAATCTGAGCTCCAGTTACTACTTAAGGTGTTTCCTGAACGTAC	KRT34	NM_021013	ref|Homo sapiens keratin 34 (KRT34), mRNA [NM_021013]
A_23_P101093	na	na	na	na	na	na	na	na	0.039	up	1.28	COPZ2	8	ref|NM_016429|ens|ENST00000006101|gb|AB037938|gb|BC015924	GGTTCTTCAGTCTGCCAAGGAACAAATTAAATGGTCGTTATTGAAATGAAGGCTGTGGAT	COPZ2	NM_016429	ref|Homo sapiens coatomer protein complex, subunit zeta 2 (COPZ2), mRNA [NM_016429]
A_23_P101185	na	na	na	na	0.0383758	up	1.62	NARS	na	na	na	na	8	ref|NM_004539|ens|ENST00000256854|ens|ENST00000423481|gb|AK129897	AGGATTTGAAGTAAGAACATAATTTTGGGGAGAGTTTTTTAGTGATTCACAGTATCCCTC	NARS	NM_004539	ref|Homo sapiens asparaginyl-tRNA synthetase (NARS), mRNA [NM_004539]
A_23_P101237	0.00202	up	1.59	C18orf21	0.00548941	up	1.83	C18orf21	na	na	na	na	4	ref|NM_031446|gb|BC025950|ens|ENST00000428793|ens|ENST00000333234	ACTCCTACAAGTAAACTCAGCCTGAAGACACCAGAGAGAAGGACTGCAAACCCAAATCAT	C18orf21	NM_031446	ref|Homo sapiens chromosome 18 open reading frame 21 (C18orf21), mRNA [NM_031446]
A_23_P101246	0.0168	down	-1.35	VSIG10L	na	na	na	na	na	na	na	na	8	ref|NM_001163922|gb|BC016993|gb|CR626634|gb|AF086436	ACATCATTAACTCAGCACTTAACCCAGAGCCTCACACACAGCAGGCAATCAATAAATATT	VSIG10L	NM_001163922	ref|Homo sapiens V-set and immunoglobulin domain containing 10 like (VSIG10L), mRNA [NM_001163922]
A_23_P101297	0.0306	down	-1.24	EML2	na	na	na	na	0.034	up	2.08	EML2	4	ref|NM_012155|gb|AK296258|gb|AK295905|gb|AK026616	ACATGGAATGGGCCACAGCTACTTGTGTCCTAGGGTTTGGGGTGTTTGGGATCTGGTCTG	EML2	NM_012155	ref|Homo sapiens echinoderm microtubule associated protein like 2 (EML2), mRNA [NM_012155]
A_23_P101351	0.00564	up	1.67	ZNF426	0.000563016	up	1.69	ZNF426	na	na	na	na	4	ref|NM_024106|gb|AB209837|ens|ENST00000253115|gb|AK095759	AATAAATGTGGGAAAGCTCTCATTTGTTCCAGTTCACTTTAAAGACATGAATGAACTCAC	ZNF426	NM_024106	ref|Homo sapiens zinc finger protein 426 (ZNF426), mRNA [NM_024106]
A_23_P101374	0.0185	down	-1.55	CYP2S1	na	na	na	na	na	na	na	na	8	ref|NM_030622|ens|ENST00000310054|gb|AK027605|gb|AY358603	AGTCACCCCTTTTTAAGCACCCTGATTCTACCAAATGCAAACACATCTGGGTCTGCGATT	CYP2S1	NM_030622	ref|Homo sapiens cytochrome P450, family 2, subfamily S, polypeptide 1 (CYP2S1), mRNA [NM_030622]
A_23_P101392	na	na	na	na	0.0264658	up	1.42	TMEM38A	0.000331	up	2.87	TMEM38A	4	ref|NM_024074|ens|ENST00000187762|gb|AK025981|gb|BC001195	TTCACAGAATCCTGGCAGCAGCTCCAGTCAAGAATGTCACTGGTTGGCATGATATTCTTA	TMEM38A	NM_024074	ref|Homo sapiens transmembrane protein 38A (TMEM38A), mRNA [NM_024074]
A_23_P1014	na	na	na	na	0.0143974	up	2.16	C1orf97	0.00625	up	3.11	C1orf97	4	ref|NR_026761|gb|AK130858|gb|AK130857|gb|BC005997	CCAGCACTGTGAAGCCTACAAAAACATTGATGCGCTGGCTTGGGGATTTGAATTTGAACA	C1orf97	NR_026761	ref|Homo sapiens chromosome 1 open reading frame 97 (C1orf97), non-coding RNA [NR_026761]
A_23_P101407	na	na	na	na	0.0334709	up	1.72	C3	7.78e-06	up	74.61	C3	4	ref|NM_000064|gb|CR619237|ens|ENST00000245907|gb|K02765	GTGCCGCTGTGCTGAGGAGAATTGCTTCATACAAAAGTCGGATGACAAGGTCACCCTGGA	C3	NM_000064	ref|Homo sapiens complement component 3 (C3), mRNA [NM_000064]
A_23_P101480	na	na	na	na	0.0150225	down	-2.13	MAST1	na	na	na	na	8	ref|NM_014975|ens|ENST00000251472|gb|AB023190|gb|BC027985	GGCCCCGCGCTGTACAGCCTCCGTATACATATGTACACATATAAATAAAGTGCGTCCGTG	MAST1	NM_014975	ref|Homo sapiens microtubule associated serine/threonine kinase 1 (MAST1), mRNA [NM_014975]
A_23_P101532	na	na	na	na	0.00542568	up	1.13	RPS11	0.00075	up	1.28	RPS11	4	ref|NM_001015|ens|ENST00000270625|ens|ENST00000425052|gb|AK311809	CCACAAGAACATGTCTGTACACCTGTCCCCCTGCTTCAGGGACGTCCAGATCGGTGACAT	RPS11	NM_001015	ref|Homo sapiens ribosomal protein S11 (RPS11), mRNA [NM_001015]
A_23_P101551	0.0245	down	-1.44	BCAT2	na	na	na	na	na	na	na	na	8	ref|NM_001190|ref|NM_001164773|ref|NR_028450|ref|NR_028451	TCCCTACCAATGACTCACCTGAAGTGCAATACGAAATAAAAGGCCAGCGGGCGGCGTCTG	BCAT2	NM_001190	ref|Homo sapiens branched chain aminotransferase 2, mitochondrial (BCAT2), nuclear gene encoding mitochondrial protein, transcript variant a, mRNA [NM_001190]
A_23_P10156	0.0132	up	1.47	CHMP6	0.0198493	up	3.49	CHMP6	na	na	na	na	4	ref|NM_024591|ens|ENST00000325167|gb|AK021811|gb|AK223187	CCAGTTTGAAGGTGGCGGGCCAGGGGCTTTCTTGCTGAATTGACGACTCCGAGAGCCCTG	CHMP6	NM_024591	ref|Homo sapiens chromatin modifying protein 6 (CHMP6), mRNA [NM_024591]
A_23_P101564	na	na	na	na	0.0305905	up	15.35	FGF21	na	na	na	na	8	ref|NM_019113|gb|BC018404|ens|ENST00000222157|gb|AB021975	TGAAGCCGGGAGTTATTCAAATCTTGGGAGTCAAGACATCCAGGTTCCTGTGCCAGCGGC	FGF21	NM_019113	ref|Homo sapiens fibroblast growth factor 21 (FGF21), mRNA [NM_019113]
A_23_P101642	0.00794	up	2.49	PTPRH	0.00137485	up	3.43	PTPRH	0.005	up	1.86	PTPRH	0	ref|NM_002842|ref|NM_001161440|ens|ENST00000376350|ens|ENST00000263434	TCTGAGGCAGGAAGGAATTTGGGTCTGGAGTTCTGGCTACTTGAGGACCAAAGGCAGGAA	PTPRH	NM_002842	ref|Homo sapiens protein tyrosine phosphatase, receptor type, H (PTPRH), transcript variant 1, mRNA [NM_002842]
A_23_P101699	na	na	na	na	0.0191521	down	-1.69	HDGF2	na	na	na	na	8	ref|NM_032631|ref|NM_001001520|gb|AB208892|ens|ENST00000429822	AGAAGAAAGAGCCCTCCGTGGAGGAGAAGCTGCAGAAGCTGCACAGTGAGATCAAGTTTG	HDGFRP2	NM_032631	ref|Homo sapiens hepatoma-derived growth factor-related protein 2 (HDGFRP2), transcript variant 2, mRNA [NM_032631]
A_23_P101737	0.0357	up	1.69	DOT1L	0.0420975	down	-1.47	DOT1L	0.0171	up	1.66	DOT1L	0	ref|NM_032482|ens|ENST00000398665|gb|AL080221|gb|BC032803	CGGGCGGCGCCTGGGAGTGGCTCTTGCTCAGGAATTGATAGGAACCCTAAAAACTAGGAT	DOT1L	NM_032482	ref|Homo sapiens DOT1-like, histone H3 methyltransferase (S. cerevisiae) (DOT1L), mRNA [NM_032482]
A_23_P101742	na	na	na	na	0.00491829	up	2.19	MRPL54	na	na	na	na	8	ref|NM_172251|ens|ENST00000330133|gb|BC065273|gb|BM920672	CTGAAACCGGATGCTGAGTACCCTGAATGGCTGTTCGAGATGAACTTGGGTCCCCCAAAG	MRPL54	NM_172251	ref|Homo sapiens mitochondrial ribosomal protein L54 (MRPL54), nuclear gene encoding mitochondrial protein, mRNA [NM_172251]
A_23_P101796	na	na	na	na	na	na	na	na	0.0414	up	1.77	SYDE1	8	ref|NM_033025|gb|AK128870|gb|BC029926|ens|ENST00000342784	GGGCTTCCCCTTTTGTTGCCAAAAAGGTAGTTCTCGCGCTTGCTAGGCTGGCCTCTCTTG	SYDE1	NM_033025	ref|Homo sapiens synapse defective 1, Rho GTPase, homolog 1 (C. elegans) (SYDE1), mRNA [NM_033025]
A_23_P101871	na	na	na	na	0.00657037	up	2.18	FBXO17	na	na	na	na	8	ref|NM_024907|ref|NM_148169|ens|ENST00000292852|ens|ENST00000392076	CCTGCAAATTTTCTTCTCCTGCAAGGATCTCGGTGGACTCAGTCACAAAACAAAGGCTAA	FBXO17	NM_024907	ref|Homo sapiens F-box protein 17 (FBXO17), transcript variant 2, mRNA [NM_024907]
A_23_P101905	0.0475	down	-1.95	APC2	0.012999	down	-2.05	APC2	na	na	na	na	4	ref|NM_005883|gb|AB012162|ens|ENST00000233607|ens|ENST00000238483	TAAGGACGACACCGTCAGCTGTCCGACTCGCACACATTTAATAAACTGAGCTCTTGCATT	APC2	NM_005883	ref|Homo sapiens adenomatosis polyposis coli 2 (APC2), mRNA [NM_005883]
A_23_P101950	0.034	down	-1.26	MDH1	na	na	na	na	0.0232	up	1.65	MDH1	4	ref|NM_005917|gb|AK295931|gb|AK300719|ens|ENST00000394423	TTAAAGATTACGTGCTTCTTGGTACAGGTTTGTGAATGACAGTTTATCGTCATGCTGTTA	MDH1	NM_005917	ref|Homo sapiens malate dehydrogenase 1, NAD (soluble) (MDH1), mRNA [NM_005917]
A_23_P101960	0.00467	up	2.26	ZFP36L2	na	na	na	na	na	na	na	na	8	ref|NM_006887|ens|ENST00000282388|gb|BC005010|gb|BM979687	AGCAAAAAAGTCGAACTTTTTCTGTTGAACAAAATATTCACAACAGGGCAGTTGTGATAC	ZFP36L2	NM_006887	ref|Homo sapiens zinc finger protein 36, C3H type-like 2 (ZFP36L2), mRNA [NM_006887]
A_23_P101992	na	na	na	na	0.00559978	up	2.88	MARCO	na	na	na	na	8	ref|NM_006770|gb|AK301407|ens|ENST00000410021|ens|ENST00000327097	TGGCTGGATAATGTTCAGTGTCGGGGCACGGAGAGTACCCTGTGGAGCTGCACCAAGAAT	MARCO	NM_006770	ref|Homo sapiens macrophage receptor with collagenous structure (MARCO), mRNA [NM_006770]
A_23_P102000	0.0152	down	-1.28	CXCR4	na	na	na	na	5.87e-05	up	3.69	CXCR4	4	ref|NM_001008540|ref|NM_003467|ens|ENST00000241393|ens|ENST00000409817	TGCTGGTTTTTCAGTTTTCAGGAGTGGGTTGATTTCAGCACCTACAGTGTACAGTCTTGT	CXCR4	NM_001008540	ref|Homo sapiens chemokine (C-X-C motif) receptor 4 (CXCR4), transcript variant 1, mRNA [NM_001008540]
A_23_P10206	0.0056	up	6.49	HAS2	na	na	na	na	na	na	na	na	8	ref|NM_005328|ens|ENST00000303924|gb|BC109071|gb|BC109072	ATTTCTATGAAAATGGGATGAATTCTTTGTTTATGCACTTTTTCCTTACTGTGCATCCGC	HAS2	NM_005328	ref|Homo sapiens hyaluronan synthase 2 (HAS2), mRNA [NM_005328]
A_23_P102109	0.00211	up	1.99	TUBA4A	na	na	na	na	0.00321	down	-1.94	TUBA4A	4	ref|NM_006000|ref|NR_003063|gb|AK299958|ens|ENST00000295766	GCACTGATATGTGGGTGAGGGCATGGAGGAGGGTGAGTTCTCCAAGGCCCATGAGGATAT	TUBA4A	NM_006000	ref|Homo sapiens tubulin, alpha 4a (TUBA4A), mRNA [NM_006000]
A_23_P102122	na	na	na	na	na	na	na	na	0.014	up	1.27	ARPC2	8	ref|NM_152862|ref|NM_005731|gb|AK093625|ens|ENST00000456575	AAGCGGCTGGCAACTGAAGGCTGGAACACTTGCTACTGGATAATCGTAGCTTTTAATGTT	ARPC2	NM_152862	ref|Homo sapiens actin related protein 2/3 complex, subunit 2, 34kDa (ARPC2), transcript variant 1, mRNA [NM_152862]
A_23_P102235	na	na	na	na	0.0460816	down	-1.42	SNRPG	0.0158	down	-1.55	SNRPG	4	ref|NM_003096|ref|NM_001146693|gb|BC035103|ens|ENST00000449935	ACAACAGAACAATATTGGAATGGTGGTAATACGAGGAAATAGTATCATCATGTTAGAAGC	SNRPG	NM_003096	ref|Homo sapiens small nuclear ribonucleoprotein polypeptide G (SNRPG), mRNA [NM_003096]
A_23_P102258	0.041	down	-1.16	MRPL53	na	na	na	na	na	na	na	na	8	ref|NM_053050|gb|AK075209|ens|ENST00000454193|ens|ENST00000409710	GGCGCTGATACTGGTCGCTGACAGCGCCAAAGAGACCAACAAGATGATTTTAGCGTGGAC	MRPL53	NM_053050	ref|Homo sapiens mitochondrial ribosomal protein L53 (MRPL53), nuclear gene encoding mitochondrial protein, mRNA [NM_053050]
A_23_P102262	0.0463	down	-1.2	MRPL19	na	na	na	na	na	na	na	na	8	ref|NM_014763|ens|ENST00000393909|gb|CR622228|gb|CR595766	CATCACCAGAATGGTCTTTAATGAGCATGGAACCTGAGCAAAGGGAATAGGTGGGATGAA	MRPL19	NM_014763	ref|Homo sapiens mitochondrial ribosomal protein L19 (MRPL19), nuclear gene encoding mitochondrial protein, mRNA [NM_014763]
A_23_P102351	na	na	na	na	0.0176347	up	1.58	CHST10	na	na	na	na	8	ref|NM_004854|ens|ENST00000264249|gb|CR593915|gb|BC010441	ACAGCCCAGCAGGGAGGAAGCATCACACAGCGTTAGGAGCCGTTTCCTTCAGGTGTTAAG	CHST10	NM_004854	ref|Homo sapiens carbohydrate sulfotransferase 10 (CHST10), mRNA [NM_004854]
A_23_P102364	0.0249	down	-1.22	NGEF	0.00221443	down	-1.68	NGEF	0.00681	up	1.49	NGEF	0	ref|NM_019850|ref|NM_001114090|ens|ENST00000264051|ens|ENST00000373552	AGGAGCCCAGGTGTTTTAAGGAATGAATTGGTCACTGCATCTTGTATCGATTATGGTTCT	NGEF	NM_019850	ref|Homo sapiens neuronal guanine nucleotide exchange factor (NGEF), transcript variant 1, mRNA [NM_019850]
A_23_P102404	na	na	na	na	0.0451993	up	1.6	CCT7	na	na	na	na	8	ref|NM_006429|ref|NM_001166285|ref|NM_001166284|ref|NM_001009570	GGGGTACATGGTATGGAGTAGACATCAACAACGAGGACATTGCTGACAACTTTGAAGCTT	CCT7	NM_006429	ref|Homo sapiens chaperonin containing TCP1, subunit 7 (eta) (CCT7), transcript variant 1, mRNA [NM_006429]
A_23_P102462	na	na	na	na	0.00462898	down	-2.13	FBLN7	0.0395	up	1.57	FBLN7	4	ref|NM_153214|ref|NM_001128165|gb|BC126987|gb|CR620397	CTTCCAGGCCAACCACGTGTCCAAGGTCACCATCTTTGTATCCCCCTATGACTTCTGAGG	FBLN7	NM_153214	ref|Homo sapiens fibulin 7 (FBLN7), transcript variant 1, mRNA [NM_153214]
A_23_P102508	na	na	na	na	0.0424099	up	1.35	SLC5A6	0.0217	down	-1.29	SLC5A6	4	ref|NM_021095|ref|NR_028323|ens|ENST00000310574|gb|AK027855	TTTTTCTCGTCGCTTGCCAATCTGTTTTTTAAAGGATCAGGCTCGTAGGGAGCAGGATCA	SLC5A6	NM_021095	ref|Homo sapiens solute carrier family 5 (sodium-dependent vitamin transporter), member 6 (SLC5A6), transcript variant 1, mRNA [NM_021095]
A_23_P102571	0.0434	down	-1.25	SLC2A4RG	0.00222887	up	2.03	SLC2A4RG	na	na	na	na	4	ref|NM_020062|gb|CR626338|gb|BC017446|ens|ENST00000344814	CATGTTTGTTTTTGAAGCTCAGGTGTCTCACGTCTGGGCTGCACCAGGCGAAGAGAGAAA	SLC2A4RG	NM_020062	ref|Homo sapiens SLC2A4 regulator (SLC2A4RG), mRNA [NM_020062]
A_23_P102582	na	na	na	na	na	na	na	na	0.0469	up	1.23	C20orf24	8	ref|NM_018840|ref|NM_199483|ref|NR_026562|gb|CR609489	TAAACTATCAATGGCATTTCAAGTCTTCTGAAACAGCATGGCTGTATGTGCGTGGTCCAT	C20orf24	NM_018840	ref|Homo sapiens chromosome 20 open reading frame 24 (C20orf24), transcript variant 1, mRNA [NM_018840]
A_23_P102611	na	na	na	na	0.014322	down	-1.54	WISP2	na	na	na	na	8	ref|NM_003881|gb|CR603485|gb|BC058074|ens|ENST00000372868	CATTTTTCTGGGGGTAGGATGAAGAGAAGGCACACAGAGATTCTGGATCTCCTGCTGCCT	WISP2	NM_003881	ref|Homo sapiens WNT1 inducible signaling pathway protein 2 (WISP2), mRNA [NM_003881]
A_23_P102706	na	na	na	na	0.011679	up	2.23	SNPH	na	na	na	na	8	ref|NM_014723|gb|AF187733|ens|ENST00000381876|ens|ENST00000381867	TAGATTTCTCCCAAGGGGATCACTTAGCTTCTCACTGACACACCCTTCCCAATTGCCACA	SNPH	NM_014723	ref|Homo sapiens syntaphilin (SNPH), mRNA [NM_014723]
A_23_P102731	4.63e-05	up	3.96	SMOX	0.0106443	up	3.43	SMOX	0.0317	up	1.42	SMOX	0	ref|NM_175839|ref|NM_175842|ref|NM_175840|ref|NM_175841	CTGCCTTGTTATTGTAAGTGCCTTCAATACTTTGCATTTTGGGATAATAAAAAAGGCTCC	SMOX	NM_175839	ref|Homo sapiens spermine oxidase (SMOX), transcript variant 1, mRNA [NM_175839]
A_23_P102842	na	na	na	na	na	na	na	na	0.0321	up	1.2	NFS1	8	ref|NM_021100|gb|CR610756|gb|CR594451|gb|AK056242	TTTTCTGTAGCTCCAAAGGCTATCTCTTCATATTGACTGCAGACAGACTGAATGGACAGT	NFS1	NM_021100	ref|Homo sapiens NFS1 nitrogen fixation 1 homolog (S. cerevisiae) (NFS1), nuclear gene encoding mitochondrial protein, mRNA [NM_021100]
A_23_P102876	na	na	na	na	0.00451	down	-1.32	CCT8	na	na	na	na	8	ref|NM_006585|gb|CR597602|gb|CR594631|gb|CR612497	GACTTGAACAGTATGCTATTAAGAAGTTTGCTGAGGCATTTGAAGCTATTCCCCGCGCAC	CCT8	NM_006585	ref|Homo sapiens chaperonin containing TCP1, subunit 8 (theta) (CCT8), mRNA [NM_006585]
A_23_P10291	na	na	na	na	na	na	na	na	0.0258	down	-1.75	CTSE	8	ref|NM_001910|ref|NM_148964|ens|ENST00000360218|ens|ENST00000361052	TATTGGTAATGTTAAGACTGCTGGGTGGGTTTGGAGTTCTTGGCTTTAATCATTCATTAC	CTSE	NM_001910	ref|Homo sapiens cathepsin E (CTSE), transcript variant 1, mRNA [NM_001910]
A_23_P102925	0.0155	up	1.67	PWP2	na	na	na	na	na	na	na	na	8	ref|NM_005049|ens|ENST00000291576|gb|AK314184|gb|CR601365	TGACAGCCTGCATCTGCTTGGAGGAGGAGGCAGAGACTCAGAAGAAGAGATGCTGGCCTA	PWP2	NM_005049	ref|Homo sapiens PWP2 periodic tryptophan protein homolog (yeast) (PWP2), mRNA [NM_005049]
A_23_P102937	0.00465	down	-1.23	SUMO3	na	na	na	na	na	na	na	na	8	ref|NM_006936|gb|CR599370|ens|ENST00000411651|ens|ENST00000332859	AAAGTAAGACTAAGTATTGCTGAATTTGCAGTTATGTTGTCGTGTATAAGAGCTACTTCC	SUMO3	NM_006936	ref|Homo sapiens SMT3 suppressor of mif two 3 homolog 3 (S. cerevisiae) (SUMO3), mRNA [NM_006936]
A_23_P102965	na	na	na	na	0.00770053	up	1.52	BCL2L13	0.00497	up	1.44	BCL2L13	4	ref|NM_015367|gb|AK056248|gb|BC003032|ens|ENST00000317582	TTCTATGGGTCTCTTGCTAGGGGGTAAGGATTTTTATTCTTGGGCTTATAGAGCCAGTTA	BCL2L13	NM_015367	ref|Homo sapiens BCL2-like 13 (apoptosis facilitator) (BCL2L13), nuclear gene encoding mitochondrial protein, mRNA [NM_015367]
A_23_P102988	na	na	na	na	0.00606415	up	1.49	TXNRD2	na	na	na	na	8	ref|NM_006440|gb|CR591901|gb|CR590262|gb|BC117354	AGACACCAGAAGTCTGAATTTGGAGAAGGCTGGGGTAGATACTAGCCCCGACACTCAGAA	TXNRD2	NM_006440	ref|Homo sapiens thioredoxin reductase 2 (TXNRD2), nuclear gene encoding mitochondrial protein, mRNA [NM_006440]
A_23_P10305	na	na	na	na	0.0348737	up	1.67	CTPS2	na	na	na	na	8	ref|NM_175859|ref|NM_001144002|ref|NM_019857|ens|ENST00000380207	TCTTGGGCAAGGACAAAGAAGATTCCTTTTCTGGGAGTTTGTCTTGGGATGCAACTAGCA	CTPS2	NM_175859	ref|Homo sapiens CTP synthase II (CTPS2), transcript variant 2, mRNA [NM_175859]
A_23_P103070	na	na	na	na	0.0312379	down	-1.31	YWHAH	0.00272	down	-1.71	YWHAH	4	ref|NM_003405|gb|CR622695|gb|CR615843|ens|ENST00000427094	AGCTGATAGTGTTTCGTTAAGCAGTACATCTTGTGCATGCAAAAATGAATTCACCCCTCC	YWHAH	NM_003405	ref|Homo sapiens tyrosine 3-monooxygenase/tryptophan 5-monooxygenase activation protein, eta polypeptide (YWHAH), mRNA [NM_003405]
A_23_P103099	na	na	na	na	0.0121777	up	1.4	RBM9	na	na	na	na	8	ref|NM_001031695|ref|NM_014309|ref|NM_001082577|ref|NM_001082576	CCTAGATGTAGAAATAATCTTTAATGAACGTGGCTCTAAGGGATTCGGGTTCGTAACTTT	RBM9	NM_001031695	ref|Homo sapiens RNA binding motif protein 9 (RBM9), transcript variant 1, mRNA [NM_001031695]
A_23_P103110	0.000178	up	5.05	MAFF	na	na	na	na	0.00421	up	2.16	MAFF	4	ref|NM_012323|ref|NM_001161572|ref|NM_001161574|ref|NM_001161573	CTCCCTGGGAAAAGTGGCGTATGGCCCTGAGCTGGGCTTTATATTTTATATCTGCAAATA	MAFF	NM_012323	ref|Homo sapiens v-maf musculoaponeurotic fibrosarcoma oncogene homolog F (avian) (MAFF), transcript variant 1, mRNA [NM_012323]
A_23_P103149	na	na	na	na	na	na	na	na	0.0197	up	1.39	ACO2	8	ref|NM_001098|gb|CR595461|ens|ENST00000445344|ens|ENST00000396512	TTTGAGTTTGGTTCAGATCTTAAGCAGCTCCATGCAACTGTATTTATTTTTGATGACAAG	ACO2	NM_001098	ref|Homo sapiens aconitase 2, mitochondrial (ACO2), nuclear gene encoding mitochondrial protein, mRNA [NM_001098]
A_23_P103256	na	na	na	na	na	na	na	na	0.000794	up	5.83	CFHR3	8	ref|NM_021023|ref|NM_001166624|gb|AK298459|gb|CU687072	TCAGGAAGTTACTGGGATTACATTCATTGCACACAAAATGGGTGGTCACCAGCAGTACCA	CFHR3	NM_021023	ref|Homo sapiens complement factor H-related 3 (CFHR3), transcript variant 1, mRNA [NM_021023]
A_23_P103282	0.0137	down	-1.3	TMEM59	na	na	na	na	0.0275	up	1.28	TMEM59	4	ref|NM_004872|gb|AK225624|gb|CR591312|gb|AK124967	TGAAGATCATGAAGAAGCAGGGCCTCTACCTACAAAAGTGAATCTTGCTCATTCTGAAAT	TMEM59	NM_004872	ref|Homo sapiens transmembrane protein 59 (TMEM59), mRNA [NM_004872]
A_23_P103398	na	na	na	na	0.0029848	up	1.77	PSEN2	na	na	na	na	8	ref|NM_000447|ref|NM_012486|gb|U34349|ens|ENST00000366782	GGAGTGTTCCCAATGCTTTGTCCATGATGTCCTTGTTATTTTATTGCCTTTAGAAACTGA	PSEN2	NM_000447	ref|Homo sapiens presenilin 2 (Alzheimer disease 4) (PSEN2), transcript variant 1, mRNA [NM_000447]
A_23_P103414	na	na	na	na	0.0298559	up	1.46	YTHDF2	na	na	na	na	8	ref|NM_016258|ref|NM_001173128|ref|NM_001172828|gb|CR595878	CAAGGTTGTGTCTTTAAGGGTGGTTCATTTTCTCTGACCTTTTGTTACTCAAAGTAAAGT	YTHDF2	NM_016258	ref|Homo sapiens YTH domain family, member 2 (YTHDF2), transcript variant 1, mRNA [NM_016258]
A_23_P103433	na	na	na	na	0.0335543	up	1.75	OSCP1	na	na	na	na	8	ref|NM_145047|ens|ENST00000315643|ens|ENST00000356637|ens|ENST00000235532	CCCATGGCCCAGAATGATGCTGCTAGTTTTCTACTGAGTGAAGCCATTACGTCTATTTCT	OSCP1	NM_145047	ref|Homo sapiens organic solute carrier partner 1 (OSCP1), transcript variant 1, mRNA [NM_145047]
A_23_P103476	0.044	up	1.13	UBIAD1	0.0164684	up	1.48	UBIAD1	0.00193	down	-1.57	UBIAD1	0	ref|NM_013319|ens|ENST00000376810|gb|AF117064|gb|BC004468	TTAAAGTCAGAGTCTCTGAGGAAGGAATGTGATTTGGCAGTCAGGGTACTAAGCATGGGT	UBIAD1	NM_013319	ref|Homo sapiens UbiA prenyltransferase domain containing 1 (UBIAD1), mRNA [NM_013319]
A_23_P103503	0.0387	up	2.5	MDM4	0.00704058	up	3.37	MDM4	na	na	na	na	4	ref|NM_002393|ref|NR_024171|gb|BC105106|gb|BC143432	ATTGCCAGAATCTCTTGAAGCCATGTAGCTTATGTGAGAAAAGACCACGAGACGGGAACA	MDM4	NM_002393	ref|Homo sapiens Mdm4 p53 binding protein homolog (mouse) (MDM4), transcript variant 1, mRNA [NM_002393]
A_23_P103511	0.027	up	1.79	C1orf226	na	na	na	na	na	na	na	na	8	ref|NM_001085375|ens|ENST00000426197|gb|AK125122|gb|AK023199	GTTCTGAGGAGGAGGAGGAAGATTACAGATCTATTCTGAGTATTTTTTAGAGAGTTAATA	C1orf226	NM_001085375	ref|Homo sapiens chromosome 1 open reading frame 226 (C1orf226), transcript variant 2, mRNA [NM_001085375]
A_23_P103617	na	na	na	na	na	na	na	na	0.0165	up	3.59	ANXA9	8	ref|NM_003568|ens|ENST00000368947|gb|AJ009985|gb|BC005830	TTCTTTAAAATCCCTTAATTTTCCCATCTCAAAATTATATCTGTACCTGGGTCATCCAGC	ANXA9	NM_003568	ref|Homo sapiens annexin A9 (ANXA9), mRNA [NM_003568]
A_23_P103628	na	na	na	na	0.00131978	up	1.49	HEATR1	0.0104	down	-1.47	HEATR1	4	ref|NM_018072|gb|AK125663|ens|ENST00000366581|gb|AB385226	CCTCGCCTAAGGTTCGATTTGCTGCTTTGATTACTGTGTTAGCACTGGCTGAAAAACTAA	HEATR1	NM_018072	ref|Homo sapiens HEAT repeat containing 1 (HEATR1), mRNA [NM_018072]
A_23_P103631	na	na	na	na	na	na	na	na	0.0333	down	-1.64	EBNA1BP2	8	ref|NM_006824|ref|NM_001159936|gb|CR605280|gb|BC007344	AAGACTCGCAATTTCACGACACACTTTGATCCCTTCTGTTGGTGTCATGTTGTAAACATT	EBNA1BP2	NM_006824	ref|Homo sapiens EBNA1 binding protein 2 (EBNA1BP2), transcript variant 2, mRNA [NM_006824]
A_23_P103661	0.000602	up	1.23	YY1AP1	0.0319115	up	1.24	YY1AP1	na	na	na	na	4	ref|NM_139118|ref|NM_139119|gb|AK303386|gb|CR622167	GAAGATGCTACAGAGGAAATCAGTGGATTTCTTTGAGCTAGGAGAATAAGAGTCTGGAGA	YY1AP1	NM_139118	ref|Homo sapiens YY1 associated protein 1 (YY1AP1), transcript variant 2, mRNA [NM_139118]
A_23_P103672	na	na	na	na	0.0465715	down	-1.8	NES	0.0431	up	1.7	NES	4	ref|NM_006617|ens|ENST00000368223|gb|AB073350|gb|AF086454	GCAAAGGGAATCTCTTGCCTGCTCCATCTCATAGGCTAAGTCAGCTGAATCCCGATAGTA	NES	NM_006617	ref|Homo sapiens nestin (NES), mRNA [NM_006617]
A_23_P103690	0.0272	down	-1.51	FAM189B	na	na	na	na	na	na	na	na	8	ref|NM_006589|ref|NM_198264|gb|AL353941|gb|BC017262	ATGCCCCTTCTTATAGCACTGGAGGAGGAAAACAAATTCTTGTCCCCCTCAGAATGAGAG	FAM189B	NM_006589	ref|Homo sapiens family with sequence similarity 189, member B (FAM189B), transcript variant 1, mRNA [NM_006589]
A_23_P103703	na	na	na	na	0.0144888	up	4.2	HSPB7	na	na	na	na	8	ref|NM_014424|gb|AX747447|gb|CR749298|gb|CR749419	TATATAGATGGGGTTTTTCCAATACAGCTGGTTCGTGATAAACTGCATGAAACTCCTGCC	HSPB7	NM_014424	ref|Homo sapiens heat shock 27kDa protein family, member 7 (cardiovascular) (HSPB7), mRNA [NM_014424]
A_23_P10374	0.0166	down	-1.66	R3HDM2	0.0466186	down	-1.38	R3HDM2	na	na	na	na	4	ref|NM_014925|gb|CR596895|gb|AX775763|gb|AX775761	TGTTTGTTTGAGGTTCGTGCCGCAGTAACAGACACAGTATTTAATTGCACATACAGATGT	R3HDM2	NM_014925	ref|Homo sapiens R3H domain containing 2 (R3HDM2), mRNA [NM_014925]
A_23_P103756	na	na	na	na	0.0298146	down	-1.97	OVGP1	0.0141	up	2.29	OVGP1	4	ref|NM_002557|gb|AK298757|gb|AB208783|ens|ENST00000369728	TCTGAGGTGGGCACTCACCCCAGGATGGGTAACTTGGGTCTTCAGATGGAAGCTGAAAAC	OVGP1	NM_002557	ref|Homo sapiens oviductal glycoprotein 1, 120kDa (OVGP1), mRNA [NM_002557]
A_23_P103775	0.0305	up	3.68	LRRC8C	na	na	na	na	na	na	na	na	8	ref|NM_032270|ens|ENST00000370454|gb|AB081509|gb|BC113973	AAACTCTGAAGATTGGAAAAAACAGCCTATCTGTACTTTCACCGAAAATTGGAAATTTGC	LRRC8C	NM_032270	ref|Homo sapiens leucine rich repeat containing 8 family, member C (LRRC8C), mRNA [NM_032270]
A_23_P10385	0.00134	up	1.5	DTL	0.0305708	down	-1.48	DTL	na	na	na	na	4	ref|NM_016448|gb|AK027651|ens|ENST00000318866|ens|ENST00000420235	GGAAGATGTTATTTATGACCAATATCTGCCAGTAACGCTGTTTATCTCACTTGCTTTGAA	DTL	NM_016448	ref|Homo sapiens denticleless homolog (Drosophila) (DTL), mRNA [NM_016448]
A_23_P103877	0.00482	up	2.73	LRRC38	na	na	na	na	na	na	na	na	8	gb|CR622769|ens|ENST00000401092|ens|ENST00000376085|gb|BC016048	ATATAATAGGCCTCAGCAACCTTGGGATGTTATACTGGGAACTAATAAACTCGTGTGCAA	LRRC38	CR622769	gb|full-length cDNA clone CS0DI025YD24 of Placenta Cot 25-normalized of Homo sapiens (human). [CR622769]
A_23_P103905	0.0409	down	-1.25	UFC1	0.000888477	down	-2.31	UFC1	na	na	na	na	4	ref|NM_016406|ens|ENST00000368003|gb|AB154405|gb|DQ893161	TGGATGGAAAGACAGCAAAGATGTACAGGGGTGGCAAAATATGCCTGACGGATCATTTCA	UFC1	NM_016406	ref|Homo sapiens ubiquitin-fold modifier conjugating enzyme 1 (UFC1), mRNA [NM_016406]
A_23_P103932	na	na	na	na	na	na	na	na	0.00112	up	5.6	FGR	8	ref|NM_001042747|ref|NM_005248|ref|NM_001042729|gb|AK125143	TTGCAGAGCACTTCCCACCTCTCTGAATAGTGTGTATGTGTTGGTTTATTGATTCTGTAA	FGR	NM_001042747	ref|Homo sapiens Gardner-Rasheed feline sarcoma viral (v-fgr) oncogene homolog (FGR), transcript variant 2, mRNA [NM_001042747]
A_23_P104025	na	na	na	na	0.00773468	up	3.96	TSEN15	na	na	na	na	8	ref|NM_052965|ref|NM_001127394|ref|NR_023349|ens|ENST00000361641	TTTTAGGTTTTTAAACCTACTGTCTCTGTCATAACTTGTCAACACTGCTGTATGAAGCAC	TSEN15	NM_052965	ref|Homo sapiens tRNA splicing endonuclease 15 homolog (S. cerevisiae) (TSEN15), transcript variant 1, mRNA [NM_052965]
A_23_P104046	na	na	na	na	0.0141483	down	-1.72	BPNT1	na	na	na	na	8	ref|NM_006085|gb|CR599062|gb|AK298476|gb|AK300777	GCCTCTGCTTATGTATTTGCAAGTCCTGGTTGTAAGAAGTGGGATACTTGTGCTCCAGAA	BPNT1	NM_006085	ref|Homo sapiens 3'(2'), 5'-bisphosphate nucleotidase 1 (BPNT1), mRNA [NM_006085]
A_23_P104073	na	na	na	na	na	na	na	na	0.0177	up	1.82	S100A3	8	ref|NM_002960|ens|ENST00000368712|ens|ENST00000368713|gb|Z18948	GGTCTTCTGCGATCAGTTAACCCATTTTACCTAGGAGGCCCAGAGATGTGAGGGCTCCTT	S100A3	NM_002960	ref|Homo sapiens S100 calcium binding protein A3 (S100A3), mRNA [NM_002960]
A_23_P104109	na	na	na	na	0.00808914	down	-1.53	RPS6KC1	na	na	na	na	8	ref|NM_012424|ref|NM_001136138|gb|BX647303|gb|AK122989	CATTTGGTGTTGCAGATGAGTTGTAAAGCCAACTGAAAGAGTTCCTTCAAGAAGTTCCTC	RPS6KC1	NM_012424	ref|Homo sapiens ribosomal protein S6 kinase, 52kDa, polypeptide 1 (RPS6KC1), transcript variant 1, mRNA [NM_012424]
A_23_P104151	na	na	na	na	na	na	na	na	0.0213	up	1.65	TMEM69	8	ref|NM_016486|ens|ENST00000372025|gb|BC121117|gb|BC133692	TTACCACATTATCCCAACTGGTTTAAAGCCCTGAGGATAGTAGTCACTTTATTGGCCACT	TMEM69	NM_016486	ref|Homo sapiens transmembrane protein 69 (TMEM69), mRNA [NM_016486]
A_23_P104188	na	na	na	na	na	na	na	na	0.0106	up	2.01	ELF3	8	ref|NM_004433|ref|NM_001114309|gb|BX537368|ens|ENST00000310044	AGGTTCTCCAGAGTCGGAACTGAGGGTTGGAACTATACCCGGGACCAAACTCACGGACCA	ELF3	NM_004433	ref|Homo sapiens E74-like factor 3 (ets domain transcription factor, epithelial-specific ) (ELF3), transcript variant 1, mRNA [NM_004433]
A_23_P104201	na	na	na	na	na	na	na	na	0.023	down	-1.21	YME1L1	8	ref|NM_139312|ref|NM_014263|gb|CR611030|gb|AK297973	TGGTGTAATTGAAGGGTGTGAAATGCTTTGTCAATCATTTGTCACATTTATCCAGTTTGG	YME1L1	NM_139312	ref|Homo sapiens YME1-like 1 (S. cerevisiae) (YME1L1), nuclear gene encoding mitochondrial protein, transcript variant 1, mRNA [NM_139312]
A_23_P104318	8.77e-05	up	2.61	DDIT4	0.000213654	up	4.1	DDIT4	0.0127	up	1.59	DDIT4	0	ref|NM_019058|ens|ENST00000307365|gb|AY090097|gb|CR621890	TCGTGGAGGTGGTTTGTGTATCTTACTGGTCTGAAGGGACCAAGTGTGTTTGTTGTTTGT	DDIT4	NM_019058	ref|Homo sapiens DNA-damage-inducible transcript 4 (DDIT4), mRNA [NM_019058]
A_23_P104323	na	na	na	na	na	na	na	na	0.000598	up	1.64	MGMT	8	ref|NM_002412|ens|ENST00000440826|gb|BT006714|gb|AB528701	TCTTCACCATCCCGTTTTCCAGCAAGAGTCGTTCACCAGACAGGTGTTATGGAAGCTGCT	MGMT	NM_002412	ref|Homo sapiens O-6-methylguanine-DNA methyltransferase (MGMT), mRNA [NM_002412]
A_23_P10442	0.00364	down	-1.23	OSBPL1A	na	na	na	na	0.0188	up	1.26	OSBPL1A	4	ref|NM_080597|ref|NM_018030|ens|ENST00000357041|ens|ENST00000446832	GCACATTCATCTTAAATCTTATAGTATTTATCCACCCAAACCCCAGACTGAGATACTGCT	OSBPL1A	NM_080597	ref|Homo sapiens oxysterol binding protein-like 1A (OSBPL1A), transcript variant OSBPL1B, mRNA [NM_080597]
A_23_P104438	na	na	na	na	na	na	na	na	0.0104	down	-1.96	MYPN	8	ref|NM_032578|gb|BC144333|gb|BC144334|gb|AF328296	AAAGAAATCCTCTGTGGGGTCACTTTAAAAACTACTAGCTTCAACTACCACTTACAAAAT	MYPN	NM_032578	ref|Homo sapiens myopalladin (MYPN), mRNA [NM_032578]
A_23_P104471	na	na	na	na	na	na	na	na	0.0043	up	3.91	DUSP13	8	ref|NM_001007271|ref|NM_001007273|ref|NM_001007272|ref|NM_016364	GATTTCCCTGACCCAATTCAGAGATTCTTTATGCAAAAGTGAGTTCAGTCCATCTCTATA	DUSP13	NM_001007271	ref|Homo sapiens dual specificity phosphatase 13 (DUSP13), transcript variant 1, mRNA [NM_001007271]
A_23_P104563	na	na	na	na	0.00860833	up	3.52	CPT1A	na	na	na	na	8	ref|NM_001031847|ens|ENST00000376618|gb|BT009791|gb|AK314301	ATGACGGCTATGGTGTGTCGTACATCCTTGTGGGAGAGAACCTCATCAATTTCCACATTT	CPT1A	NM_001031847	ref|Homo sapiens carnitine palmitoyltransferase 1A (liver) (CPT1A), nuclear gene encoding mitochondrial protein, transcript variant 2, mRNA [NM_001031847]
A_23_P104583	na	na	na	na	na	na	na	na	0.0355	up	2.24	CORO1B	8	ref|NM_020441|ref|NM_001018070|gb|CR613163|gb|CR604899	ACACCAGTGTGGTCTACGTCTGCGGCAAGGGTGACTCCAGCATCCGGTACTTTGAGATCA	CORO1B	NM_020441	ref|Homo sapiens coronin, actin binding protein, 1B (CORO1B), transcript variant 1, mRNA [NM_020441]
A_23_P104641	na	na	na	na	na	na	na	na	0.0427	up	1.59	C11orf2	8	ref|NM_013265|gb|AF289557|ens|ENST00000279281|gb|CR606643	ACTGCCACTTTCTGCAGCTCTACCTGTGGCGTTTTGTGGCCGACGAAGAACTCGTGCACT	C11orf2	NM_013265	ref|Homo sapiens chromosome 11 open reading frame 2 (C11orf2), mRNA [NM_013265]
A_23_P104651	na	na	na	na	0.0450307	down	-1.16	CDCA5	na	na	na	na	8	ref|NM_080668|ens|ENST00000275517|gb|CR614636|gb|AK093670	TCACCAGATGATGCAGAGTTGAGATCATCATTGCAAAGTTCTCTGTTCCTGAGGAACTAA	CDCA5	NM_080668	ref|Homo sapiens cell division cycle associated 5 (CDCA5), mRNA [NM_080668]
A_23_P104692	na	na	na	na	na	na	na	na	0.00245	up	1.46	PELI3	8	ref|NM_145065|ref|NM_001098510|gb|CR606152|ens|ENST00000320740	CAAAGGGAGGAGAGAGGACTCACTGGTCAAGAGTGTCGGCTGTGACACAAGGGCCATCAT	PELI3	NM_145065	ref|Homo sapiens pellino homolog 3 (Drosophila) (PELI3), transcript variant 1, mRNA [NM_145065]
A_23_P104705	na	na	na	na	na	na	na	na	0.00934	up	1.73	SLC29A2	8	ref|NM_001532|gb|BC143335|gb|CR621298|gb|AK057041	CACAGGATGCCTACTTCATCACCTTCATGCTGCTCTTTGCCGTTTCTAATGGCTACCTGG	SLC29A2	NM_001532	ref|Homo sapiens solute carrier family 29 (nucleoside transporters), member 2 (SLC29A2), mRNA [NM_001532]
A_23_P104762	0.0236	up	1.68	YAP1	0.00279117	up	1.96	YAP1	na	na	na	na	4	ref|NM_006106|ref|NM_001130145|gb|AY316529|gb|AK316116	AGCTTTGAGTTCTGACATCCTTAATGACATGGAGTCTGTTTTGGCTGCCACCAAGCTAGA	YAP1	NM_006106	ref|Homo sapiens Yes-associated protein 1, 65kDa (YAP1), transcript variant 2, mRNA [NM_006106]
A_23_P104798	0.00334	up	1.9	IL18	0.00173646	up	2.26	IL18	na	na	na	na	4	ref|NM_001562|gb|AY266351|gb|BC015863|ens|ENST00000280357	TTGAATGACCAAGTTCTCTTCATTGACCAAGGAAATCGGCCTCTATTTGAAGATATGACT	IL18	NM_001562	ref|Homo sapiens interleukin 18 (interferon-gamma-inducing factor) (IL18), mRNA [NM_001562]
A_23_P104804	na	na	na	na	0.0179689	up	2.38	ZBTB16	na	na	na	na	8	ref|NM_006006|ref|NM_001018011|ens|ENST00000335953|ens|ENST00000310883	GCATCCACACGGGTGAGAAACCCTACGAGTGCAATGGCTGTGGCAAGAAGTTCAGCCTCA	ZBTB16	NM_006006	ref|Homo sapiens zinc finger and BTB domain containing 16 (ZBTB16), transcript variant 1, mRNA [NM_006006]
A_23_P104876	0.0239	down	-1.49	SPA17	na	na	na	na	0.0238	up	2.12	SPA17	4	ref|NM_017425|ens|ENST00000227135|gb|BC019224|gb|AK311806	TCTCAGATATCTGGGAAGGAGGAAGAGACATCAGTCACCATCTTAGACTCTTCTGAGGAA	SPA17	NM_017425	ref|Homo sapiens sperm autoantigenic protein 17 (SPA17), mRNA [NM_017425]
A_23_P104892	na	na	na	na	0.010804	up	1.27	EIF4G2	0.00849	down	-1.52	EIF4G2	4	ref|NM_001418|ref|NM_001172705|ref|NM_001042559|gb|BC065276	AAGCAGAGGCAGTCTATTGCAAGGGACCTTCTTTGCTGCCAGTTATCATAGGCTGTTTTA	EIF4G2	NM_001418	ref|Homo sapiens eukaryotic translation initiation factor 4 gamma, 2 (EIF4G2), transcript variant 1, mRNA [NM_001418]
A_23_P104942	na	na	na	na	na	na	na	na	0.0184	down	-1.49	TMX2	8	ref|NM_015959|ref|NM_001144012|ref|NR_026593|ens|ENST00000278422	AGACAATATTGAACAACCCCCTATTTTGTGGGGATTGAGAAGGGGTGAATAGAGGCTTGA	TMX2	NM_015959	ref|Homo sapiens thioredoxin-related transmembrane protein 2 (TMX2), transcript variant 1, mRNA [NM_015959]
A_23_P105002	0.0475	down	-1.33	ROM1	na	na	na	na	0.0204	up	1.61	ROM1	4	ref|NM_000327|ens|ENST00000278833|gb|L07894|gb|BC008100	AGCAAAGAACAGAGTGATGGGAAAGTGACATGAGAAGGCCTGGAGGCTGATTCTGATATA	ROM1	NM_000327	ref|Homo sapiens retinal outer segment membrane protein 1 (ROM1), mRNA [NM_000327]
A_23_P105028	na	na	na	na	0.0440476	up	1.5	ATL3	0.00521	down	-1.45	ATL3	4	ref|NM_015459|gb|AK301910|gb|AK097588|gb|AL117600	AGCTCAATAGCATCTTAACGTGAAGATCAAACAAGAACACAACAAGCCCCTACTGATTTC	ATL3	NM_015459	ref|Homo sapiens atlastin GTPase 3 (ATL3), mRNA [NM_015459]
A_23_P105227	na	na	na	na	0.0106394	up	1.96	ME3	0.0113	up	1.64	ME3	4	ref|NM_001014811|ref|NM_006680|ref|NM_001161586|gb|AK300974	TGACAGACAAGTTTGGAATAAATTGCCTCATCCAATTTGAAGACTTCGCCAATGCCAATG	ME3	NM_001014811	ref|Homo sapiens malic enzyme 3, NADP(+)-dependent, mitochondrial (ME3), nuclear gene encoding mitochondrial protein, transcript variant 2, mRNA [NM_001014811]
A_23_P105276	0.00448	up	1.73	ZNF84	0.011679	up	1.79	ZNF84	na	na	na	na	4	ref|NM_003428|ref|NM_001127372|gb|BC036656|ens|ENST00000392319	CACAGCAAAGAAGAATCCTGTGAATGTCCAAAAGCCTTCCAGAAGTCAAGTCTCTTAAGC	ZNF84	NM_003428	ref|Homo sapiens zinc finger protein 84 (ZNF84), transcript variant 1, mRNA [NM_003428]
A_23_P105307	na	na	na	na	na	na	na	na	0.0269	up	2.17	DGKA	8	ref|NM_201444|ref|NM_201445|ref|NM_001345|ref|NM_201554	GGCTGGAGGGTGCAATTGAGATGGGCCAAATCTATACCAAGCTCAAGAATGCTGGACGTC	DGKA	NM_201444	ref|Homo sapiens diacylglycerol kinase, alpha 80kDa (DGKA), transcript variant 1, mRNA [NM_201444]
A_23_P105313	na	na	na	na	0.02616	down	-1.18	EIF2B1	0.00242	down	-1.4	EIF2B1	4	ref|NM_001414|gb|CR609524|ens|ENST00000228958|gb|CR606092	ACATTCCTCAGCAGGATCAAGCCAAACAGTAAAAACTACCAAGAGAACACGAGGAAGGCA	EIF2B1	NM_001414	ref|Homo sapiens eukaryotic translation initiation factor 2B, subunit 1 alpha, 26kDa (EIF2B1), mRNA [NM_001414]
A_23_P105409	na	na	na	na	na	na	na	na	0.0146	up	4.4	MAP3K12	8	ref|NM_006301|gb|AK094195|ens|ENST00000444144|ens|ENST00000267079	TCTACCTTCAGCTCAGAGAATCCATCAGATGGGGAGGAAGGCACAGCTAGTGAACCTTCC	MAP3K12	NM_006301	ref|Homo sapiens mitogen-activated protein kinase kinase kinase 12 (MAP3K12), mRNA [NM_006301]
A_23_P105436	na	na	na	na	0.0319174	up	1.63	PTPN11	na	na	na	na	8	ref|NM_002834|gb|BC008692|ens|ENST00000392597|ens|ENST00000392596	CATCAATGCAAATATCATCATGCCTGAATTTGAAACCAAGTGCAACAATTCAAAGCCCAA	PTPN11	NM_002834	ref|Homo sapiens protein tyrosine phosphatase, non-receptor type 11 (PTPN11), mRNA [NM_002834]
A_23_P105519	na	na	na	na	na	na	na	na	0.011	down	-1.31	WBP11	8	ref|NM_016312|ref|NR_003558|ens|ENST00000261167|ens|ENST00000339271	TAAACTTAGATGAAAGAGCTGCTTCCATTGTCAGGGTATTTTCTAATTTCAGTTCAAGGA	WBP11	NM_016312	ref|Homo sapiens WW domain binding protein 11 (WBP11), mRNA [NM_016312]
A_23_P105562	na	na	na	na	0.00657037	down	-2.25	VWF	na	na	na	na	8	ref|NM_000552|gb|AK298097|ens|ENST00000453974|ens|ENST00000261405	TGTACCATGAGGTTCTCAATGCCATGGAGTGCAAATGCTCCCCCAGGAAGTGCAGCAAGT	VWF	NM_000552	ref|Homo sapiens von Willebrand factor (VWF), mRNA [NM_000552]
A_23_P10559	0.00692	down	-2.14	AATK	na	na	na	na	0.0373	down	-1.71	AATK	4	ref|NM_001080395|gb|AK094931|ens|ENST00000374792|ens|ENST00000417379	GGAAGTTGGGTGATTTTAAGTTATTGTTGCCAAAGAGATGTAAAGTTTATTGTTGCTTCG	AATK	NM_001080395	ref|Homo sapiens apoptosis-associated tyrosine kinase (AATK), mRNA [NM_001080395]
A_23_P105592	0.00435	down	-1.37	MVK	0.00150857	down	-3.14	MVK	0.00771	up	1.32	MVK	0	ref|NM_000431|ref|NM_001114185|ens|ENST00000228510|ens|ENST00000392727	AGGGGCTGTCCCGGAGGCGGTGGGCCTGGTTAAATAAGGCAGGGTTTATATGCACTTTCT	MVK	NM_000431	ref|Homo sapiens mevalonate kinase (MVK), transcript variant 1, mRNA [NM_000431]
A_23_P1056	na	na	na	na	na	na	na	na	0.0107	down	-1.39	GPR89B	8	ref|NM_016334|ref|NM_001097613|ref|NM_001097612|ref|NM_001097616	AGAGGCCAGTGGTTTCAAAATTTAGATATAAGAGGGGGGAAAAATGGAACCAGGGCCTGA	GPR89B	NM_016334	ref|Homo sapiens G protein-coupled receptor 89B (GPR89B), mRNA [NM_016334]
A_23_P105619	na	na	na	na	0.00551784	up	1.93	TMEM116	0.0253	up	1.46	TMEM116	4	ref|NM_138341|gb|CR592366|gb|CR612135|gb|BC000282	AGGCTCGGCGTGATGCAGATACCCAGACACCATTATTATGCTCACAGAAGAGATTCTATA	TMEM116	NM_138341	ref|Homo sapiens transmembrane protein 116 (TMEM116), mRNA [NM_138341]
A_23_P105625	0.0452	down	-1.12	COQ5	0.00243821	up	1.6	COQ5	0.0107	up	1.36	COQ5	0	ref|NM_032314|gb|CR591293|ens|ENST00000445328|ens|ENST00000288532	AGGCATTTGGTCTGTATCTTTGCTCAACTGCTAATTTCTCTTGGCTGTAGGGTGTGTGGT	COQ5	NM_032314	ref|Homo sapiens coenzyme Q5 homolog, methyltransferase (S. cerevisiae) (COQ5), nuclear gene encoding mitochondrial protein, mRNA [NM_032314]
A_23_P105664	0.0494	up	1.36	CCDC59	na	na	na	na	na	na	na	na	8	ref|NM_014167|ref|NR_033192|ens|ENST00000256151|gb|CR611206	CAGGTTAAAATATCTGCTGCCTATTAGGTTCTTCTGTGACATGTGCCTCCCAGCAGTGAA	CCDC59	NM_014167	ref|Homo sapiens coiled-coil domain containing 59 (CCDC59), transcript variant 1, mRNA [NM_014167]
A_23_P105833	na	na	na	na	na	na	na	na	0.00761	up	1.47	BIVM	8	ref|NM_017693|ref|NM_001159596|ens|ENST00000257336|gb|BC020663	ATTTCATGAGTCTAGTAGTTCTTTGATTTATAGCAGGATCTTGCTTGCCTCATTTGTTTC	BIVM	NM_017693	ref|Homo sapiens basic, immunoglobulin-like variable motif containing (BIVM), transcript variant 1, mRNA [NM_017693]
A_23_P105862	na	na	na	na	0.00818637	up	2.18	FRY	0.0275	up	2.72	FRY	4	ref|NM_023037|gb|AK091422|gb|AL049784|ens|ENST00000380257	ATATGTAAAGGGCCATTCTTAAGTTCTCTCCTTAAACTTAATGCTGTCAAGTGTTAGATG	FRY	NM_023037	ref|Homo sapiens furry homolog (Drosophila) (FRY), mRNA [NM_023037]
A_23_P105900	na	na	na	na	na	na	na	na	0.0214	down	-1.19	BTF3L1	8	ref|NR_026983|gb|BC106717|gb|BC106718|gb|BC115358	AAGGAACAGTGATTCACTTTAACAACCCTGAAGTTCAGGCATCGCTGGCAGCAAACACTT	BTF3L1	NR_026983	ref|Homo sapiens basic transcription factor 3, like 1 pseudogene (BTF3L1), non-coding RNA [NR_026983]
A_23_P105923	na	na	na	na	0.0162139	down	-2.65	DIO3	na	na	na	na	8	ref|NM_001362|gb|CR591237|gb|CR609174|gb|CR613810	AAGTTGGGGTGTCTGCTTTGGGACCAGAGGAAGATAGCTTGAGAGGCATTGGCGAGGTTC	DIO3	NM_001362	ref|Homo sapiens deiodinase, iodothyronine, type III (DIO3), mRNA [NM_001362]
A_23_P105963	na	na	na	na	na	na	na	na	0.0244	up	2.98	AK7	8	ref|NM_152327|ens|ENST00000267584|gb|AK057426|gb|BC035256	CTGGAGGCTCAGTCAATTCCCCTGAGAAACTATTTAATGACCTATGTGATGCCAACTCTT	AK7	NM_152327	ref|Homo sapiens adenylate kinase 7 (AK7), mRNA [NM_152327]
A_23_P106002	0.00159	up	2.03	NFKBIA	na	na	na	na	0.00313	up	3.7	NFKBIA	4	ref|NM_020529|gb|CR603242|gb|CR615977|gb|CR594547	TGATGTGGGGTGAAAAGTTACTACCTGTCAAGGTTTGTGTTACCCTCCTGTAAATGGTGT	NFKBIA	NM_020529	ref|Homo sapiens nuclear factor of kappa light polypeptide gene enhancer in B-cells inhibitor, alpha (NFKBIA), mRNA [NM_020529]
A_23_P106024	na	na	na	na	0.0169901	up	3.17	JAG2	na	na	na	na	8	ref|NM_002226|ref|NM_145159|gb|CR618490|gb|Y14330	GCGTTTGTTACCAGAGGTTGTGCACTGTTTACAGAATCTTCCTTTTATTCCTCACTCGGG	JAG2	NM_002226	ref|Homo sapiens jagged 2 (JAG2), transcript variant 1, mRNA [NM_002226]
A_23_P106056	0.0373	down	-1.22	DAD1	0.0413856	down	-1.2	DAD1	na	na	na	na	4	ref|NM_001344|ens|ENST00000250498|gb|CR593103|gb|AK223129	TTCTGGAGATGGCAGCTTATTGGACACATGGATTTTCTTCAGATTTGCACTTACTGCTAG	DAD1	NM_001344	ref|Homo sapiens defender against cell death 1 (DAD1), mRNA [NM_001344]
A_23_P106127	0.0285	down	-1.41	KIAA0586	na	na	na	na	na	na	na	na	8	ref|NM_014749|gb|AB011158|gb|AY359881|gb|AK302635	CATTTTACCTTGGCTTAAAACCCTCTCTCAGACTGTTTGGTTTTTGAGCATATTCTGAAA	KIAA0586	NM_014749	ref|Homo sapiens KIAA0586 (KIAA0586), mRNA [NM_014749]
A_23_P106194	na	na	na	na	0.000622674	down	-4.72	FOS	na	na	na	na	8	ref|NM_005252|gb|AK298659|gb|AK290907|gb|CR612516	AGAGGGTTCCTGTAGACCTAGGGAGGACCTTATCTGTGCGTGAAACACACCAGGCTGTGG	FOS	NM_005252	ref|Homo sapiens FBJ murine osteosarcoma viral oncogene homolog (FOS), mRNA [NM_005252]
A_23_P106204	na	na	na	na	na	na	na	na	0.00393	up	2.68	GSTZ1	8	ref|NM_145870|ref|NM_001513|ref|NM_145871|gb|AK315154	TACCCTACCATCAGCTCCATCAACAAGAGGCTGCTGGTCTTGGAGGCCTTCCAGGTGTCT	GSTZ1	NM_145870	ref|Homo sapiens glutathione transferase zeta 1 (GSTZ1), transcript variant 1, mRNA [NM_145870]
A_23_P106299	na	na	na	na	0.0344403	down	-1.44	SERF2	0.00339	up	1.41	SERF2	4	ref|NM_001018108|gb|BC008916|gb|CR626415|gb|AK307547	GCAGAAAAAGGCAAACGAGAAGAAGGAGGAACCCAAGTAGCTTTGTGGCTTCGTGTCCAA	SERF2	NM_001018108	ref|Homo sapiens small EDRK-rich factor 2 (SERF2), mRNA [NM_001018108]
A_23_P106433	0.0219	down	-1.47	RCCD1	na	na	na	na	na	na	na	na	8	ref|NM_033544|ref|NM_001017919|gb|CR614843|ens|ENST00000394258	TTGCTTTTGAGTGTTAGATAAATGGAATCCTGTGTATGTGCTTTTGTGTCGTTTTTGTCA	RCCD1	NM_033544	ref|Homo sapiens RCC1 domain containing 1 (RCCD1), transcript variant 1, mRNA [NM_033544]
A_23_P106463	0.0398	down	-1.17	OAZ2	0.0031531	down	-1.62	OAZ2	na	na	na	na	4	ref|NM_002537|gb|CR612625|ens|ENST00000403937|ens|ENST00000326005	CCAAGGTCTCCTTCTTGGGGTCACAAACAGCAGTAAGGAAGAGGAATATATAGCAACTCA	OAZ2	NM_002537	ref|Homo sapiens ornithine decarboxylase antizyme 2 (OAZ2), mRNA [NM_002537]
A_23_P106505	0.0301	up	1.17	LCMT2	na	na	na	na	0.00268	down	-1.51	LCMT2	4	ref|NM_014793|ens|ENST00000305641|gb|AK292587|gb|BC015949	CCTTGTGATTTGAGATGGTACCTTAGAAAAAGTTACACGCAGTTCCGTGGTTGAATATAT	LCMT2	NM_014793	ref|Homo sapiens leucine carboxyl methyltransferase 2 (LCMT2), mRNA [NM_014793]
A_23_P106544	0.0388	down	-1.08	C16orf61	0.00854025	down	-1.88	C16orf61	na	na	na	na	4	ref|NM_020188|gb|CR594333|ens|ENST00000219400|gb|AK123193	TCTGGGTTGATACCTGAAAGAATCCTGTCTTATTTGGTCTCCATAATCCTTTGAATGGAA	C16orf61	NM_020188	ref|Homo sapiens chromosome 16 open reading frame 61 (C16orf61), mRNA [NM_020188]
A_23_P106562	na	na	na	na	na	na	na	na	0.0136	up	2	GALNS	8	ref|NM_000512|gb|AK308269|gb|CR620126|gb|BX649181	AACTGGGCGGTCATGAACTGGGCACCTCCGGGCTGTGAAAAGTTAGGGAAGTGTCTGACA	GALNS	NM_000512	ref|Homo sapiens galactosamine (N-acetyl)-6-sulfate sulfatase (GALNS), mRNA [NM_000512]
A_23_P106602	0.00609	up	3.21	CRISPLD2	na	na	na	na	na	na	na	na	8	ref|NM_031476|ens|ENST00000262424|gb|CR606278|gb|AK056839	CAAAGCATCCCACTCAAGGGAGACTTGAAACTTCCAGTGTGAGTTGACCCCATCATTTAA	CRISPLD2	NM_031476	ref|Homo sapiens cysteine-rich secretory protein LCCL domain containing 2 (CRISPLD2), mRNA [NM_031476]
A_23_P106617	na	na	na	na	0.00104095	down	-3.51	WFDC1	na	na	na	na	8	ref|NM_021197|ens|ENST00000219454|gb|CR604862|gb|CR610530	AAGCAGCTAGGTTGCAAGAACATTCCTCTACTTTCTGCTAAGCCTTGGAAACAGTTGGGA	WFDC1	NM_021197	ref|Homo sapiens WAP four-disulfide core domain 1 (WFDC1), mRNA [NM_021197]
A_23_P106633	na	na	na	na	0.0408628	up	1.35	DDX28	na	na	na	na	8	ref|NM_018380|ens|ENST00000332395|gb|AK002144|gb|BC024273	GAAGCTGCTGAGCATGGCTTTCTGTAGTCTTTAGCAAGACACAAGTGGATTTTGACTTTG	DDX28	NM_018380	ref|Homo sapiens DEAD (Asp-Glu-Ala-Asp) box polypeptide 28 (DDX28), nuclear gene encoding mitochondrial protein, mRNA [NM_018380]
A_23_P106682	na	na	na	na	0.00226512	down	-1.98	EMP2	na	na	na	na	8	ref|NM_001424|ens|ENST00000359543|gb|U52100|gb|BC009687	TTCCGGAGCTGGGTTGCTTCTGCTGCAGTACAGAATCCACATTCAGATAACCATTTTGTA	EMP2	NM_001424	ref|Homo sapiens epithelial membrane protein 2 (EMP2), mRNA [NM_001424]
A_23_P106720	na	na	na	na	na	na	na	na	0.00489	up	2.41	TBL3	8	ref|NM_006453|gb|CR594622|gb|U02609|gb|BC021563	GCTGTGCCAAGGATCAGAGCGTCCGTATCTGGAGAATGAACAAGGCTGGCCAGGTGATGT	TBL3	NM_006453	ref|Homo sapiens transducin (beta)-like 3 (TBL3), mRNA [NM_006453]
A_23_P106727	0.0449	up	1.3	RAB11FIP3	na	na	na	na	na	na	na	na	8	ref|NM_014700|ref|NM_001142272|ens|ENST00000434585|ens|ENST00000457159	AGAGGTCGCCTCCTATTGTACATTTGGGGAAAGCCTTGGGTGTAAATCAGTGTAAACTTG	RAB11FIP3	NM_014700	ref|Homo sapiens RAB11 family interacting protein 3 (class II) (RAB11FIP3), transcript variant 1, mRNA [NM_014700]
A_23_P106737	na	na	na	na	na	na	na	na	0.0443	down	-1.37	LUC7L	8	ref|NM_201412|gb|AK097974|gb|CR590928|gb|BX647161	CTGAAGGTAATGTGGATGAATCCCAGAAGATTCTTATGGAAGTGGAAAAAGTTCGTGCGA	LUC7L	NM_201412	ref|Homo sapiens LUC7-like (S. cerevisiae) (LUC7L), transcript variant 2, mRNA [NM_201412]
A_23_P106773	0.0189	down	-1.22	SULT1A2	na	na	na	na	0.00387	up	1.57	SULT1A2	4	ref|NM_177528|ref|NM_001054|ens|ENST00000395630|ens|ENST00000335715	AGAGGGAGTGTGCGAATCAAGCCTGACCAAGAGGCTCCAGAATAAAGTATGATTTGTGTT	SULT1A2	NM_177528	ref|Homo sapiens sulfotransferase family, cytosolic, 1A, phenol-preferring, member 2 (SULT1A2), transcript variant 2, mRNA [NM_177528]
A_23_P106806	na	na	na	na	na	na	na	na	0.0424	up	2.49	PRSS27	8	ref|NM_031948|gb|AK055576|gb|BC036912|gb|AK310214	AACCCAAAACCATCAAGAATGACATGCTGTGCGCCGGCTTCGAGGAGGGCAAGAAGGATG	PRSS27	NM_031948	ref|Homo sapiens protease, serine 27 (PRSS27), mRNA [NM_031948]
A_23_P106835	0.0148	down	-1.52	BBS2	na	na	na	na	0.0279	up	1.58	BBS2	4	ref|NM_031885|ens|ENST00000245157|gb|AK289604|gb|BC014140	TGGGGACAGCTTCTTCCTAGGTGAGGAAAATACAGGTCATGAAGTTCCTGGCAAAGATTT	BBS2	NM_031885	ref|Homo sapiens Bardet-Biedl syndrome 2 (BBS2), mRNA [NM_031885]
A_23_P106844	0.000258	up	4.22	MT2A	0.00470411	up	1.53	MT2A	0.0136	up	2	MT2A	0	ref|NM_005953|ens|ENST00000245185|gb|V00594|gb|CR625648	CAACCCTGACCGTGACCGTTTGCTATATTCCTTTTTCTATGAAATAATGTGAATGATAAT	MT2A	NM_005953	ref|Homo sapiens metallothionein 2A (MT2A), mRNA [NM_005953]
A_23_P106887	0.00442	up	1.41	FUS	na	na	na	na	na	na	na	na	8	ref|NM_004960|ref|NM_001170634|ref|NM_001170937|ref|NR_028388	TATTGACTGGTTTGATGGTAAAGAATTCTCCGGAAATCCTATCAAGGTCTCATTTGCTAC	FUS	NM_004960	ref|Homo sapiens fused in sarcoma (FUS), transcript variant 1, mRNA [NM_004960]
A_23_P106898	na	na	na	na	na	na	na	na	0.0219	up	4.13	ORAI3	8	ref|NM_152288|ens|ENST00000318663|gb|AK298276|gb|BC016150	GCCACCATTTCCATTCCTATACAGGATGTGAAGGTCAGAAGGCAGCCAATTGTTGGTTTA	ORAI3	NM_152288	ref|Homo sapiens ORAI calcium release-activated calcium modulator 3 (ORAI3), mRNA [NM_152288]
A_23_P106998	na	na	na	na	0.017594	up	1.41	MRPS23	na	na	na	na	8	ref|NM_016070|ens|ENST00000313608|gb|AK312729|gb|AF161447	TAGAGCGAAGTTTTATTCAGTGTATGGGTCTGGTCAAAGAGCTTTTGATCTATTCAATCC	MRPS23	NM_016070	ref|Homo sapiens mitochondrial ribosomal protein S23 (MRPS23), nuclear gene encoding mitochondrial protein, mRNA [NM_016070]
A_23_P107036	0.0288	up	1.4	TMEM11	na	na	na	na	na	na	na	na	8	ref|NM_003876|ref|NR_024547|ens|ENST00000317635|gb|CR618067	CAGATCACGGGTGTACCCAGGGTTTTTCAGCTCATTACACTAAGATGTGGATTTCCATAA	TMEM11	NM_003876	ref|Homo sapiens transmembrane protein 11 (TMEM11), transcript variant 1, mRNA [NM_003876]
A_23_P107073	0.0433	down	-1.25	RPA1	0.0055063	down	-1.34	RPA1	na	na	na	na	4	ref|NM_002945|ens|ENST00000254719|gb|BC018126|gb|CR592316	GGCTACAAAGCGTTTCTTTACTTTTCACTTCAATTAATGCTGCGCTTCGCTTGGTGAGTG	RPA1	NM_002945	ref|Homo sapiens replication protein A1, 70kDa (RPA1), mRNA [NM_002945]
A_23_P107173	0.0456	down	-1.41	MEOX1	0.000213654	down	-3.32	MEOX1	0.0125	up	1.49	MEOX1	0	ref|NM_004527|ref|NM_001040002|ref|NM_013999|ens|ENST00000318579	TTGGGCTGTGCTCCAGAGAAAAGGAGCAGCTACTCCTTTTAAATCCACGATTTCTGGATT	MEOX1	NM_004527	ref|Homo sapiens mesenchyme homeobox 1 (MEOX1), transcript variant 1, mRNA [NM_004527]
A_23_P1072	na	na	na	na	na	na	na	na	0.0389	up	1.72	ATP1A1	8	ref|NM_000701|ref|NM_001160233|ref|NM_001160234|gb|AK296384	TGCCCTGGAATGGGTGTTGCTCTTAGGATGTATCCCCTCAAACCTACCTGGTGGTTCTGT	ATP1A1	NM_000701	ref|Homo sapiens ATPase, Na+/K+ transporting, alpha 1 polypeptide (ATP1A1), transcript variant 1, mRNA [NM_000701]
A_23_P107211	na	na	na	na	na	na	na	na	0.0101	up	1.96	RAB5C	8	ref|NM_201434|ref|NM_004583|gb|AK310234|gb|CR617879	TGAACGAAATCTTCATGGCAATAGCTAAGAAGCTTCCCAAGAACGAGCCCCAGAATGCAA	RAB5C	NM_201434	ref|Homo sapiens RAB5C, member RAS oncogene family (RAB5C), transcript variant 1, mRNA [NM_201434]
A_23_P107247	na	na	na	na	0.0141483	down	-4.85	CACNA1G	0.0274	up	2.49	CACNA1G	4	ref|NM_018896|ref|NM_198377|ref|NM_198385|ref|NM_198380	GCTCTGGGTACCTGCAAGCAGAACTTCCAAAGAGAGTTAAAAGCAGCAGCCCCGGCAACT	CACNA1G	NM_018896	ref|Homo sapiens calcium channel, voltage-dependent, T type, alpha 1G subunit (CACNA1G), transcript variant 1, mRNA [NM_018896]
A_23_P107313	na	na	na	na	0.0347299	down	-1.4	SDF2	na	na	na	na	8	ref|NM_006923|gb|CR598630|ens|ENST00000247020|gb|BT006709	TGTAACCTCTGTGGATGACAGCAACAGTTACTGGAGGATACGGGGGAAGAGTGCCACAGT	SDF2	NM_006923	ref|Homo sapiens stromal cell-derived factor 2 (SDF2), mRNA [NM_006923]
A_23_P107421	na	na	na	na	na	na	na	na	0.00563	up	1.56	TK1	8	ref|NM_003258|ens|ENST00000405273|ens|ENST00000301634|gb|CR621570	AGGGGCTTATCTCTTCAAGTGTGGAGAGGGCAGGGTCCACGCCTCTGCTGTAGCTTATGA	TK1	NM_003258	ref|Homo sapiens thymidine kinase 1, soluble (TK1), mRNA [NM_003258]
A_23_P107513	0.0153	down	-1.38	CEP76	na	na	na	na	na	na	na	na	8	ref|NM_024899|gb|AK301964|gb|BC033026|gb|AK303117	ATGTCTTCGATCTCCTTTCTGTGAAGAAATAATCTGTTGCCGTGGAGACCAAGTGCGACT	CEP76	NM_024899	ref|Homo sapiens centrosomal protein 76kDa (CEP76), mRNA [NM_024899]
A_23_P107587	0.00768	up	1.63	NPC1	0.0371268	down	-1.37	NPC1	na	na	na	na	4	ref|NM_000271|gb|AK293779|ens|ENST00000412552|ens|ENST00000269228	ATTTCTCCCTGTCTTACTCAGTTACATAGGGCCATCAGTAAATAAAGCCAAAAGTTGTGC	NPC1	NM_000271	ref|Homo sapiens Niemann-Pick disease, type C1 (NPC1), mRNA [NM_000271]
A_23_P107653	na	na	na	na	na	na	na	na	0.00155	up	1.62	ETFB	8	ref|NM_001014763|ref|NM_001985|ens|ENST00000354232|ens|ENST00000309244	AAGCCAAGAAGAAGAAGATCGAGGTGATCAAGCCTGGGGACCTGGGTGTGGACCTGACCT	ETFB	NM_001014763	ref|Homo sapiens electron-transfer-flavoprotein, beta polypeptide (ETFB), transcript variant 2, mRNA [NM_001014763]
A_23_P107693	0.0178	up	1.75	ZNF586	na	na	na	na	na	na	na	na	8	ref|NM_017652|gb|BC124558|gb|AK095993|ens|ENST00000396154	GAATGCTAGCTTCTTTACATAAAAGAGTGCTCCCACTGAAGAAGTGCCTTTTGAGTGCAA	ZNF586	NM_017652	ref|Homo sapiens zinc finger protein 586 (ZNF586), mRNA [NM_017652]
A_23_P107855	na	na	na	na	0.00942821	up	1.84	FIZ1	0.0275	up	1.76	FIZ1	4	ref|NM_032836|ens|ENST00000221665|gb|CR596546|gb|AK027674	TAGAATGGACTGATCTATGTGCACACACCCCCATCACATGGAATGGGCTGGTCTAGGCTG	FIZ1	NM_032836	ref|Homo sapiens FLT3-interacting zinc finger 1 (FIZ1), mRNA [NM_032836]
A_23_P107933	na	na	na	na	na	na	na	na	0.0317	up	1.34	VRK3	8	ref|NM_016440|ref|NM_001025778|gb|AK303529|gb|AK311220	CCTGCATGGGTTTCGGTGTTCACCAGGACAAATACAGGTTCTTGGTGTTACCCAGCCTGG	VRK3	NM_016440	ref|Homo sapiens vaccinia related kinase 3 (VRK3), transcript variant 1, mRNA [NM_016440]
A_23_P107963	0.0133	up	1.71	FUT1	0.00137485	up	8.97	FUT1	na	na	na	na	4	ref|NM_000148|ens|ENST00000310160|gb|M35531|thc|THC2474190	AACTCAGCTGCCACGGGTGAGAGAGCAGGAGGTATGAATTAAAAGTCTACAGCACTAAAA	FUT1	NM_000148	ref|Homo sapiens fucosyltransferase 1 (galactoside 2-alpha-L-fucosyltransferase, H blood group) (FUT1), mRNA [NM_000148]
A_23_P107994	na	na	na	na	na	na	na	na	0.0499	up	1.72	TMEM160	8	ref|NM_017854|ens|ENST00000253047|gb|BC002907|gb|AK000519	AGCCTGCTCTGGGCGTGCGCCGTGGGCCTCTACATGGGGCAGCTGGAGCTGGACGTGGAG	TMEM160	NM_017854	ref|Homo sapiens transmembrane protein 160 (TMEM160), mRNA [NM_017854]
A_23_P108028	0.0393	up	1.45	ZNF146	0.00731834	up	2.09	ZNF146	na	na	na	na	4	ref|NM_007145|ref|NM_001099638|ref|NM_001099639|ens|ENST00000443387	TTGGGAATAGGGAAACATTCCTTGGAACAATTTGAGAAATACTTAGCGGTTCTACTTATG	ZNF146	NM_007145	ref|Homo sapiens zinc finger protein 146 (ZNF146), transcript variant 1, mRNA [NM_007145]
A_23_P10815	0.0253	down	-1.22	PUM1	na	na	na	na	na	na	na	na	8	ref|NM_001020658|ref|NM_014676|ens|ENST00000426105|ens|ENST00000373747	CCCTTCCCTTTTGTACAGAAGATGAACTGTATTTTGCATTTTGTCTACTTGTAAGTGAAT	PUM1	NM_001020658	ref|Homo sapiens pumilio homolog 1 (Drosophila) (PUM1), transcript variant 1, mRNA [NM_001020658]
A_23_P108303	na	na	na	na	na	na	na	na	0.0266	up	1.23	NDUFA7	8	ref|NM_005001|ens|ENST00000301457|gb|AF050637|gb|AF054178	AGAATGTGACCTAATTTATGACAAATACGTAGAGCTCAGGTATCACTTCTAGTTTTACTT	NDUFA7	NM_005001	ref|Homo sapiens NADH dehydrogenase (ubiquinone) 1 alpha subcomplex, 7, 14.5kDa (NDUFA7), nuclear gene encoding mitochondrial protein, mRNA [NM_005001]
A_23_P108404	na	na	na	na	0.0129223	up	1.44	AGAP1	0.0028	down	-2.01	AGAP1	4	ref|NM_001037131|ref|NM_014914|ens|ENST00000453371|gb|AY033765	CCCTATGATGGTGTGTGTCAAATCAGTTGTAGCTAATCTGTCCAGGGAGAATACTGGCTT	AGAP1	NM_001037131	ref|Homo sapiens ArfGAP with GTPase domain, ankyrin repeat and PH domain 1 (AGAP1), transcript variant 1, mRNA [NM_001037131]
A_23_P108514	na	na	na	na	na	na	na	na	0.00258	up	2.2	STK16	8	ref|NM_001008910|ref|NR_026909|gb|AK298471|gb|CR623144	CACCCATTCCATCCAGGACTTCTCTTACACTTGAGGGTAGCGGGGTCAGGACAATCATCT	STK16	NM_001008910	ref|Homo sapiens serine/threonine kinase 16 (STK16), transcript variant 1, mRNA [NM_001008910]
A_23_P108554	na	na	na	na	0.0220233	up	1.32	DDX1	na	na	na	na	8	ref|NM_004939|ens|ENST00000381341|ens|ENST00000233084|gb|CR598216	AGACATCTTTCCTGCATCTTGGCTACCTTCCTAACCAGCTGTTCAGAACCTTCTGATTTT	DDX1	NM_004939	ref|Homo sapiens DEAD (Asp-Glu-Ala-Asp) box polypeptide 1 (DDX1), mRNA [NM_004939]
A_23_P10858	0.000731	up	2.04	ANKLE2	na	na	na	na	na	na	na	na	8	ref|NM_015114|ens|ENST00000357997|gb|AK024061|gb|AK025933	AAATGATTATACGATAAAGGTATCCGTTATTTTGGAACTCATTTCAGTTGGGATCTCCTG	ANKLE2	NM_015114	ref|Homo sapiens ankyrin repeat and LEM domain containing 2 (ANKLE2), mRNA [NM_015114]
A_23_P108641	na	na	na	na	0.0121802	up	1.65	FAM136A	na	na	na	na	8	ref|NM_032822|ens|ENST00000037869|gb|CR621809|gb|CR595145	ATTTTCACCAACTTATTACTTGAAATTATAATATAGCCTGTCCGTTTGCTGTTTCCAGGC	FAM136A	NM_032822	ref|Homo sapiens family with sequence similarity 136, member A (FAM136A), mRNA [NM_032822]
A_23_P108657	na	na	na	na	0.034072	up	1.59	WDSUB1	na	na	na	na	8	ref|NM_152528|ref|NM_001128213|ref|NM_001128212|gb|CR619104	GCAATTTACCGAAGATTGGTCAGAGGAGGATGTCTCAACATGGCTTTGTGCACAAGATTT	WDSUB1	NM_152528	ref|Homo sapiens WD repeat, sterile alpha motif and U-box domain containing 1 (WDSUB1), transcript variant 3, mRNA [NM_152528]
A_23_P108662	na	na	na	na	na	na	na	na	0.0398	up	1.39	MOGS	8	ref|NM_006302|ref|NM_001146158|gb|AK292719|ens|ENST00000409065	GGCTTCTGGCTTTTGCCCCCAGCCCCTTGGATACCAGTAATTCAAACCTTCCTCATTTCA	MOGS	NM_006302	ref|Homo sapiens mannosyl-oligosaccharide glucosidase (MOGS), transcript variant 1, mRNA [NM_006302]
A_23_P10870	0.0284	down	-1.37	DOLK	na	na	na	na	na	na	na	na	8	ref|NM_014908|ens|ENST00000372586|gb|AK300180|gb|AB384111	CTTTTGAGGGGACCATGACATCTATATTTGCGCAGATCATTTCTGTAGCTCTGATCTTAA	DOLK	NM_014908	ref|Homo sapiens dolichol kinase (DOLK), mRNA [NM_014908]
A_23_P108708	na	na	na	na	0.0461092	up	1.32	RNF181	0.00124	up	1.43	RNF181	4	ref|NM_016494|ens|ENST00000306368|ens|ENST00000443647|ens|ENST00000441634	GAGACTGCCATTGAGATGCCTTGCCATCACCTTTTCCATTCCAGCTGCATTCTGCCCTGG	RNF181	NM_016494	ref|Homo sapiens ring finger protein 181 (RNF181), mRNA [NM_016494]
A_23_P108751	0.00256	up	3.62	FHL2	0.0264658	up	2.02	FHL2	na	na	na	na	4	ref|NM_001039492|ref|NM_201555|ref|NM_001450|ref|NM_201557	TTTACAGCTCTGTAACCTCCCGTTGCGTCAAGTCTAAACCAAGATTATGTGACTTGCAAT	FHL2	NM_001039492	ref|Homo sapiens four and a half LIM domains 2 (FHL2), transcript variant 5, mRNA [NM_001039492]
A_23_P108761	na	na	na	na	0.0130697	up	1.17	C2orf29	0.00478	down	-1.3	C2orf29	4	ref|NM_017546|ens|ENST00000289382|gb|CR611582|gb|AF103798	CTGGTCTTTTCCGGTTGTTGAAGACATTGGATACTGGGGAAACACCTTCTGAGACCAAAA	C2orf29	NM_017546	ref|Homo sapiens chromosome 2 open reading frame 29 (C2orf29), mRNA [NM_017546]
A_23_P108823	0.000455	up	1.97	OSBPL6	0.00257803	up	1.96	OSBPL6	na	na	na	na	4	ref|NM_032523|ref|NM_145739|gb|AB208898|gb|AK300389	GTTTAGCAAAGTAGACAGCCCTGTTCTTTGGTAGACTGGGAATGTAGAGCTAGCCAACAT	OSBPL6	NM_032523	ref|Homo sapiens oxysterol binding protein-like 6 (OSBPL6), transcript variant 1, mRNA [NM_032523]
A_23_P108835	na	na	na	na	na	na	na	na	0.000136	up	2.8	YPEL5	8	ref|NM_016061|ref|NM_001127401|ref|NM_001127400|ref|NM_001127399	AAAGTGACTTCTGAGTACAGTTAAGTTCCTCCTATTTGCCACTGGGCTGTTGGTTAGAAG	YPEL5	NM_016061	ref|Homo sapiens yippee-like 5 (Drosophila) (YPEL5), transcript variant 4, mRNA [NM_016061]
A_23_P108948	na	na	na	na	na	na	na	na	0.0355	up	2	MREG	8	ref|NM_018000|gb|CR604344|ens|ENST00000423087|gb|AK000978	TCATGCAGACTTGCACATATGCAGGGAGTATTGCACTGAAGATCTTTGCTGGACCTTCTT	MREG	NM_018000	ref|Homo sapiens melanoregulin (MREG), mRNA [NM_018000]
A_23_P109034	0.00141	up	3.41	SDC4	0.0151974	up	1.44	SDC4	0.00702	up	1.81	SDC4	0	ref|NM_002999|ens|ENST00000372733|gb|D13292|gb|X67016	CCTGGTGCCTTCTGATGGGGCTGGAATAGTTGAGGTGGATGGTTCTACCCTTTCTGCCTT	SDC4	NM_002999	ref|Homo sapiens syndecan 4 (SDC4), mRNA [NM_002999]
A_23_P109072	na	na	na	na	0.0163959	down	-1.46	SALL4	0.0229	up	1.5	SALL4	4	ref|NM_020436|gb|AY170621|gb|AY170622|ens|ENST00000395997	TGGCTCCCAGTCGGGTATCAGTGCAGATGTGGAAAAACCAAGTGCTACTGACGGCGTTCC	SALL4	NM_020436	ref|Homo sapiens sal-like 4 (Drosophila) (SALL4), mRNA [NM_020436]
A_23_P109133	na	na	na	na	na	na	na	na	0.00655	down	-2.59	AVP	8	ref|NM_000490|ens|ENST00000380293|gb|BC126224|gb|BC126196	CGAGAGCTGCGTGACCGAGCCCGAGTGCCGCGAGGGCTTTCACCGCCGCGCCCGCGCCAG	AVP	NM_000490	ref|Homo sapiens arginine vasopressin (AVP), mRNA [NM_000490]
A_23_P109143	0.0105	up	1.51	PRNP	na	na	na	na	0.0388	up	1.38	PRNP	4	ref|NM_000311|ref|NM_183079|ref|NM_001080121|ref|NM_001080122	TATATATTGCATAGGACAGACTTAGGAGTTTTGTTTAGAGCAGTTAACATCTGAAGTGTC	PRNP	NM_000311	ref|Homo sapiens prion protein (PRNP), transcript variant 1, mRNA [NM_000311]
A_23_P109254	0.00591	up	1.57	RBM39	0.0010984	up	1.81	RBM39	0.0103	down	-1.41	RBM39	0	ref|NM_184234|ref|NM_004902|gb|AK299165|gb|AK126158	ACAGCTACTGGTTCCAAGTAGACGATGAAGGAAGATATAGTCCCTTATGTATATAGCTTT	RBM39	NM_184234	ref|Homo sapiens RNA binding motif protein 39 (RBM39), transcript variant 1, mRNA [NM_184234]
A_23_P109333	na	na	na	na	0.0332379	down	-1.27	C21orf33	na	na	na	na	8	ref|NM_004649|ref|NM_198155|ens|ENST00000291577|ens|ENST00000449622	CTGCTGAGTGAGGAATGGCAGTGAGGTTTCTTCAATTAGTCTCAGTTCTCTTAATTTTCA	C21orf33	NM_004649	ref|Homo sapiens chromosome 21 open reading frame 33 (C21orf33), nuclear gene encoding mitochondrial protein, transcript variant 1, mRNA [NM_004649]
A_23_P109345	na	na	na	na	0.0227833	up	1.27	PTTG1IP	na	na	na	na	8	ref|NM_004339|gb|BC031097|ens|ENST00000423073|ens|ENST00000445724	AACCTGTACCCAGTTCTTCAGGCTGATTTCCCTGACCTCTTGGGCATTTGTATTTGTAGT	PTTG1IP	NM_004339	ref|Homo sapiens pituitary tumor-transforming 1 interacting protein (PTTG1IP), mRNA [NM_004339]
A_23_P109420	na	na	na	na	0.00153885	up	1.93	BMS1	na	na	na	na	8	ref|NM_014753|gb|BC033148|gb|BX641141|gb|BC107108	CAGAGTTCAGTATGAGGGTTTTCGACCTGGGATGTACGTCTGCGTTGAGATTGAAAATGT	BMS1	NM_014753	ref|Homo sapiens BMS1 homolog, ribosome assembly protein (yeast) (BMS1), mRNA [NM_014753]
A_23_P109427	0.0371	down	-1.26	GSTT2	na	na	na	na	na	na	na	na	8	ref|NM_000854|ref|NM_001080843|ens|ENST00000290765|ens|ENST00000215780	ACAAGACACTCAGTGTCCTTGGCAGTGCTGCTACTCCTCAGGTGCAGCATACATAACCAG	GSTT2	NM_000854	ref|Homo sapiens glutathione S-transferase theta 2 (GSTT2), mRNA [NM_000854]
A_23_P109442	na	na	na	na	0.0219425	up	2.02	HPS4	na	na	na	na	8	ref|NM_022081|ref|NM_152841|gb|AK057648|gb|AB051454	TGTCAGTGAACTGATATCTGATGTTTATGATATGGTGTCTTTTTCTTGAAACAAGCTTCC	HPS4	NM_022081	ref|Homo sapiens Hermansky-Pudlak syndrome 4 (HPS4), transcript variant 1, mRNA [NM_022081]
A_23_P109452	0.0107	down	-1.26	CHEK2	na	na	na	na	0.0154	up	1.52	CHEK2	4	ref|NM_001005735|ref|NM_007194|ref|NM_145862|gb|AY551298	GGATGAAGACATGAAGAGAAAGTTTCAAGATCTTCTGTCTGAGGAAAATGAATCCACAGC	CHEK2	NM_001005735	ref|Homo sapiens CHK2 checkpoint homolog (S. pombe) (CHEK2), transcript variant 3, mRNA [NM_001005735]
A_23_P109488	na	na	na	na	na	na	na	na	0.000561	up	3.24	PIK3IP1	8	ref|NM_052880|ref|NM_001135911|gb|AF528079|gb|BC041903	AGCTGTGCAGCCAGTGATTGGGATCAGCCAGCGGGTGCGGATGAACTCCAAGGAGAAAAA	PIK3IP1	NM_052880	ref|Homo sapiens phosphoinositide-3-kinase interacting protein 1 (PIK3IP1), transcript variant 1, mRNA [NM_052880]
A_23_P109593	na	na	na	na	na	na	na	na	0.0046	up	1.66	TBC1D22A	8	ref|NM_014346|gb|CR590373|gb|AK308039|gb|CR593690	CTTTTCTCATTTCCACTTGTACGTGTGCGCTGCTTTTCTCGTGAGATGGAGGAAGGAAAT	TBC1D22A	NM_014346	ref|Homo sapiens TBC1 domain family, member 22A (TBC1D22A), mRNA [NM_014346]
A_23_P109636	na	na	na	na	0.0106443	up	1.96	LRIG1	na	na	na	na	8	ref|NM_015541|gb|AK126745|gb|BC071561|gb|AY730707	AAAGGACAGCCCTTGACCTGGGTTCTGGGTATAATTTGCACTTTTGAGACTGGTAGCTAA	LRIG1	NM_015541	ref|Homo sapiens leucine-rich repeats and immunoglobulin-like domains 1 (LRIG1), mRNA [NM_015541]
A_23_P109677	na	na	na	na	na	na	na	na	0.00271	down	-1.72	na	9	ens|ENST00000450815	GAGAAAAAGGATTTGATTATGAGGGTTACTGCTTTCACAGAATTATTCCAGGGTTTGTAT	ENST00000450815	ENST00000450815	Unknown
A_23_P109768	0.0204	down	-1.17	RNF7	na	na	na	na	na	na	na	na	8	ref|NM_014245|ref|NM_183237|ens|ENST00000477393|ens|ENST00000477012	TGGGACTCATCAAAGCCTTGGTTTAGCATTTTGTCAGTTTTATCTTCAGAAATTCTCTGC	RNF7	NM_014245	ref|Homo sapiens ring finger protein 7 (RNF7), transcript variant 1, mRNA [NM_014245]
A_23_P109821	na	na	na	na	na	na	na	na	0.0196	up	1.28	TADA3	8	ref|NM_006354|gb|AK024982|ens|ENST00000441042|ens|ENST00000301964	TCCCCTTCAAGGACTTCTCCCTTGTGGTTTTGTAAAGTGCAAACTTAAGAATAAAGTGAC	TADA3	NM_006354	ref|Homo sapiens transcriptional adaptor 3 (TADA3), transcript variant 1, mRNA [NM_006354]
A_23_P109895	na	na	na	na	0.0159356	down	-2.12	SLC26A6	na	na	na	na	8	ref|NM_001040454|ref|NM_022911|ref|NM_134263|ref|NM_134426	GGCTGGGCACTTCTTCGATGCATCCATCACCAAGAAGCATCTCTTTGCCTCTGTCCATGA	SLC26A6	NM_001040454	ref|Homo sapiens solute carrier family 26, member 6 (SLC26A6), transcript variant 4, mRNA [NM_001040454]
A_23_P109907	na	na	na	na	na	na	na	na	0.0425	down	-2.3	ILDR1	8	ref|NM_175924|ens|ENST00000344209|ens|ENST00000273691|gb|AK129974	CACCTGTAATCACAGCACTTTGGGAGGCTAAGAATCACTTGAGACTAGGAGTTCAAGATC	ILDR1	NM_175924	ref|Homo sapiens immunoglobulin-like domain containing receptor 1 (ILDR1), mRNA [NM_175924]
A_23_P109928	na	na	na	na	0.0473214	down	-1.32	PSMD6	na	na	na	na	8	ref|NM_014814|gb|CR593438|gb|CR602355|gb|AK095059	CACAGTCTTCCAGCAGTTCGGCAGTATCTGTTTTCACTCTATGAATGCCGTTACTCTGTT	PSMD6	NM_014814	ref|Homo sapiens proteasome (prosome, macropain) 26S subunit, non-ATPase, 6 (PSMD6), mRNA [NM_014814]
A_23_P110005	na	na	na	na	0.0254374	down	-1.23	NICN1	0.00655	up	2.13	NICN1	4	ref|NM_032316|gb|AK301846|gb|CR613547|ens|ENST00000421251	GTGGCTCAACAGTTTTCTCGGGGGAGTTCAGTGACCTTTTGGTGGCCACCCTCTGTTCTC	NICN1	NM_032316	ref|Homo sapiens nicolin 1 (NICN1), mRNA [NM_032316]
A_23_P110076	0.0315	up	1.4	WDR53	na	na	na	na	na	na	na	na	8	ref|NM_182627|ens|ENST00000433160|ens|ENST00000429115|ens|ENST00000332629	AGAATCCTATTTGCTGCTTACTGGAGGGAATGATGGGAAGATCACGTTGTGGGATGCAAA	WDR53	NM_182627	ref|Homo sapiens WD repeat domain 53 (WDR53), mRNA [NM_182627]
A_23_P110167	0.00133	down	-1.47	MGST2	na	na	na	na	na	na	na	na	8	ref|NM_002413|gb|AK307231|ens|ENST00000265498|gb|AK130948	AATATCTGGACCTCAATATTGCCAAGAAACTGAGGCGGCAATTCTAACTTTTTCTCTTCC	MGST2	NM_002413	ref|Homo sapiens microsomal glutathione S-transferase 2 (MGST2), mRNA [NM_002413]
A_23_P110184	na	na	na	na	0.0106026	down	-3.89	SC4MOL	na	na	na	na	8	ref|NM_006745|ref|NM_001017369|ens|ENST00000261507|ens|ENST00000426682	GTCTTCTGGCTACTAAGTGATAAAAAGAACATTAACAACCTTTAATTACCTTCCTAGTGG	SC4MOL	NM_006745	ref|Homo sapiens sterol-C4-methyl oxidase-like (SC4MOL), transcript variant 1, mRNA [NM_006745]
A_23_P110212	na	na	na	na	0.00285197	down	-2.39	ACSL1	na	na	na	na	8	ref|NM_001995|gb|AK096117|ens|ENST00000281455|ens|ENST00000451433	ACTCGGTTCTCCAGGCCTGATTCCCCGACTCCATCCTTTTTCAGGGTTATTTAAAAATCT	ACSL1	NM_001995	ref|Homo sapiens acyl-CoA synthetase long-chain family member 1 (ACSL1), mRNA [NM_001995]
A_23_P11032	na	na	na	na	0.00268746	up	2	SLC9A7	0.041	up	1.2	SLC9A7	4	ref|NM_032591|gb|BC094742|gb|AF298591|gb|BC157023	CGACCTGACATTGACCTACGGGGACAGCACAGTGACTGCAAATGGCTCCTCAAGTTCGCA	SLC9A7	NM_032591	ref|Homo sapiens solute carrier family 9 (sodium/hydrogen exchanger), member 7 (SLC9A7), mRNA [NM_032591]
A_23_P110345	0.0194	up	2.25	CHIC2	na	na	na	na	na	na	na	na	8	ref|NM_012110|ens|ENST00000263921|gb|CR611915|gb|AF159423	CCAAAGACACCGATTTTTCGACCAGATTAGCATTTACTTTATTTATAGAGACTTTCCAAG	CHIC2	NM_012110	ref|Homo sapiens cysteine-rich hydrophobic domain 2 (CHIC2), mRNA [NM_012110]
A_23_P110430	na	na	na	na	na	na	na	na	0.032	down	-1.67	MSX1	8	ref|NM_002448|ens|ENST00000382723|gb|AK290636|gb|BC021285	AAGTGGCTGGAAGAGTCCCTTAGTACTCTTCTAGCATTTAGATCTACACTCTCGAGTTAA	MSX1	NM_002448	ref|Homo sapiens msh homeobox 1 (MSX1), mRNA [NM_002448]
A_23_P110492	na	na	na	na	na	na	na	na	0.0232	up	1.31	2011-03-06	8	ref|NM_005885|ens|ENST00000274140|ens|ENST00000397730|ens|ENST00000449913	TAAAGAGCAATGTGTTCTGGCTGTTTTATACTTCAACAATTTTTTCCCTAAGTGGTAAGC	2011-03-06	NM_005885	ref|Homo sapiens membrane-associated ring finger (C3HC4) 6 (MARCH6), mRNA [NM_005885]
A_23_P110504	na	na	na	na	0.0166429	down	-1.39	CLPTM1L	na	na	na	na	8	ref|NM_030782|gb|BC016399|ens|ENST00000320927|ens|ENST00000320895	CTGCCGCCAGCCAAGTGCAACTTGAATTGTCAATGAGTATTTTTGGAAGCATTTGGAGGA	CLPTM1L	NM_030782	ref|Homo sapiens CLPTM1-like (CLPTM1L), mRNA [NM_030782]
A_23_P110531	0.0435	up	2.63	FST	0.0349351	up	1.44	FST	na	na	na	na	4	ref|NM_013409|ref|NM_006350|ens|ENST00000396947|gb|AB451474	CTGTGAAGATATCCAGTGCACTGGTGGGAAAAAATGTTTATGGGATTTCAAGGTTGGGAG	FST	NM_013409	ref|Homo sapiens follistatin (FST), transcript variant FST344, mRNA [NM_013409]
A_23_P110571	na	na	na	na	na	na	na	na	0.0418	up	2.28	MAST4	8	ref|NM_001164664|ref|NM_015183|gb|AB385305|gb|BC080587	AAGGACTTTGTGGTACGGCAGAGGCGGGGGAAAGAGAGTTTGCGTAGCAGCCCTCACAAA	MAST4	NM_001164664	ref|Homo sapiens microtubule associated serine/threonine kinase family member 4 (MAST4), transcript variant 3, mRNA [NM_001164664]
A_23_P110606	na	na	na	na	0.00672086	up	1.53	MAML1	na	na	na	na	8	ref|NM_014757|ens|ENST00000292599|gb|D83785|gb|AF221759	CCTTTCCCATGTACTCAGTTTAGCTCTCAAAGAAGGGGTGAATCATAAAGCCAGTGAAAA	MAML1	NM_014757	ref|Homo sapiens mastermind-like 1 (Drosophila) (MAML1), mRNA [NM_014757]
A_23_P110661	na	na	na	na	na	na	na	na	0.0168	down	-1.19	SKIV2L2	8	ref|NM_015360|gb|AK304788|ens|ENST00000230640|gb|D29641	CACCTGTTTGATTACAGTTGACTACAAATGCCTGCAAGTGTGGATTTGGTTCTCCCATAC	SKIV2L2	NM_015360	ref|Homo sapiens superkiller viralicidic activity 2-like 2 (S. cerevisiae) (SKIV2L2), mRNA [NM_015360]
A_23_P110699	0.0288	up	1.51	ZNF300	na	na	na	na	0.0465	down	-1.15	ZNF300	4	ref|NM_052860|ref|NM_001172831|ref|NM_001172832|ens|ENST00000274599	CAGATTCAGTAAAGTTGATCTGTATGCATTTTCCCATCTCAAGCATATAAGTTGACCTGC	ZNF300	NM_052860	ref|Homo sapiens zinc finger protein 300 (ZNF300), transcript variant 2, mRNA [NM_052860]
A_23_P110712	0.00216	up	1.92	DUSP1	na	na	na	na	na	na	na	na	8	ref|NM_004417|gb|AK127679|ens|ENST00000434080|ens|ENST00000457103	TGTCTACTCCTAGAAGAACCAAATACCTCAATTTTTGTTTTTGAGTACTGTACTATCCTG	DUSP1	NM_004417	ref|Homo sapiens dual specificity phosphatase 1 (DUSP1), mRNA [NM_004417]
A_23_P110791	na	na	na	na	na	na	na	na	0.0221	down	-1.66	CSF1R	8	ref|NM_005211|gb|AB208819|gb|BC047521|ens|ENST00000394307	ATCCTAACTAACAGTCACGCCGTGGGATGTCTCTGTCCACATTAAACTAACAGCATTAAT	CSF1R	NM_005211	ref|Homo sapiens colony stimulating factor 1 receptor (CSF1R), mRNA [NM_005211]
A_23_P110811	na	na	na	na	0.0315011	down	-1.16	COX7C	0.036	up	1.3	COX7C	4	ref|NM_001867|ens|ENST00000247655|gb|CR599916|gb|CR617346	AGCCTCTGGAAGTGGATCAAACTAGAACTCATATGCCATACTAGATATGTTTGTCAATAA	COX7C	NM_001867	ref|Homo sapiens cytochrome c oxidase subunit VIIc (COX7C), nuclear gene encoding mitochondrial protein, mRNA [NM_001867]
A_23_P110851	na	na	na	na	na	na	na	na	0.0364	down	-1.62	TERT	8	ref|NM_198253|ref|NM_198255|gb|BC062321|ens|ENST00000448937	TGGGGGTCCCTGTGGGTCAAATTGGGGGGAGGTGCTGTGGGAGTAAAAAACTGAATATAT	TERT	NM_198253	ref|Homo sapiens telomerase reverse transcriptase (TERT), transcript variant 1, mRNA [NM_198253]
A_23_P110879	na	na	na	na	na	na	na	na	0.00721	up	1.73	TRAF3IP2	8	ref|NM_147686|ref|NM_001164281|ref|NM_001164282|ref|NR_028338	GTTGGTAAATGGCTTCCAAACTGCAATTGACATATTTGAGGATAGAATCCGAGGCATTGA	TRAF3IP2	NM_147686	ref|Homo sapiens TRAF3 interacting protein 2 (TRAF3IP2), transcript variant 2, mRNA [NM_147686]
A_23_P110882	na	na	na	na	0.0350274	down	-1.43	TSPYL4	0.00764	up	1.73	TSPYL4	4	ref|NM_021648|gb|AK091559|ens|ENST00000420283|ens|ENST00000368611	ATTTCTCTGTCAAACTCAATGATCATTTAGTACTTTTGTCTTCTCCCATGTGCTTGAAGG	TSPYL4	NM_021648	ref|Homo sapiens TSPY-like 4 (TSPYL4), mRNA [NM_021648]
A_23_P110941	na	na	na	na	0.00785724	down	-1.62	GSTA4	0.0173	up	1.47	GSTA4	4	ref|NM_001512|gb|CR608427|gb|CR597241|gb|BC063439	ATCCCAGCTCTGTCATGGTGCTATCTATGTATTAAGTTGGGTCCTAAGTTGGGTCTTTTG	GSTA4	NM_001512	ref|Homo sapiens glutathione S-transferase alpha 4 (GSTA4), mRNA [NM_001512]
A_23_P110961	0.00847	down	-1.53	BRP44L	na	na	na	na	na	na	na	na	8	ref|NM_016098|gb|CR621401|ens|ENST00000341756|ens|ENST00000360961	TTGTCCCCACTGTTTAAAAATGTTACCTGTGTATTTCCATGCAGTGTATATATTGAGATG	BRP44L	NM_016098	ref|Homo sapiens brain protein 44-like (BRP44L), mRNA [NM_016098]
A_23_P111000	na	na	na	na	0.00201197	down	-2.2	PSMB9	0.0161	up	1.62	PSMB9	4	ref|NM_002800|gb|AK303118|ens|ENST00000413480|ens|ENST00000414474	ACCATCATGGCAGTGGAGTTTGACGGGGGCGTTGTGATGGGTTCTGATTCCCGAGTGTCT	PSMB9	NM_002800	ref|Homo sapiens proteasome (prosome, macropain) subunit, beta type, 9 (large multifunctional peptidase 2) (PSMB9), mRNA [NM_002800]
A_23_P111005	0.0421	down	-1.25	YIPF3	na	na	na	na	na	na	na	na	8	ref|NM_015388|gb|CR618212|gb|CR595236|gb|CR615153	TTAAAGGACAGTCCTGATGACATGTTTCGTAGATGGGGTTTGCAGCTGCCACTGAGCTGT	YIPF3	NM_015388	ref|Homo sapiens Yip1 domain family, member 3 (YIPF3), mRNA [NM_015388]
A_23_P111037	na	na	na	na	0.0213008	down	-1.52	HIST1H3A	na	na	na	na	8	ref|NM_003529|ens|ENST00000357647|gb|CR541858|gb|BC069303	ATCAGAAGTCCACTGAACTGCTTATTCGTAAACTACCTTTCCAGCGCCTGGTGCGCGAGA	HIST1H3A	NM_003529	ref|Homo sapiens histone cluster 1, H3a (HIST1H3A), mRNA [NM_003529]
A_23_P111132	1.34e-05	down	-22.4	HSPA1A	0.00265374	down	-3.8	HSPA1A	na	na	na	na	4	ref|NM_005345|gb|AK096017|gb|AK298098|gb|AK298056	GAGCTTCAAGACTTTGCATTTCCTAGTATTTCTGTTTGTCAGTTCTCAATTTCCTGTGTT	HSPA1A	NM_005345	ref|Homo sapiens heat shock 70kDa protein 1A (HSPA1A), mRNA [NM_005345]
A_23_P111188	0.0168	down	-1.61	ZBTB22	na	na	na	na	na	na	na	na	8	ref|NM_005453|ref|NM_001145338|ens|ENST00000383196|ens|ENST00000416097	CCCGGGTGATCTCCCACCACACTTACTGTCTTCCTTTATCTCTGTGGACTTGTATATATT	ZBTB22	NM_005453	ref|Homo sapiens zinc finger and BTB domain containing 22 (ZBTB22), transcript variant 1, mRNA [NM_005453]
A_23_P111194	na	na	na	na	0.0467617	up	1.73	SPDEF	0.00299	up	1.77	SPDEF	4	ref|NM_012391|gb|AK301543|ens|ENST00000374037|gb|AB527466	CCGCCATGAACTACGACAAGCTGAGCCGCTCCATCCGCCAGTATTACAAGAAGGGCATCA	SPDEF	NM_012391	ref|Homo sapiens SAM pointed domain containing ets transcription factor (SPDEF), mRNA [NM_012391]
A_23_P111228	na	na	na	na	0.0194999	up	4.17	COQ3	na	na	na	na	8	ref|NM_017421|ens|ENST00000254759|gb|CR598978|gb|CR607786	AACATGTGATTGATCTAGAAACATTTTTACAGTGCTGCTGTCAAGTGTTAAAACCCGGTG	COQ3	NM_017421	ref|Homo sapiens coenzyme Q3 homolog, methyltransferase (S. cerevisiae) (COQ3), mRNA [NM_017421]
A_23_P111273	0.0374	down	-1.29	TBC1D7	na	na	na	na	na	na	na	na	8	ref|NM_016495|ref|NM_001143964|ref|NM_001143965|ref|NM_001143966	TTCAAGAGGTGCTTTGCGGGATGTTTGCCTGAATCCAGTTTACAGAGGGTTTGGGATAAA	TBC1D7	NM_016495	ref|Homo sapiens TBC1 domain family, member 7 (TBC1D7), transcript variant 1, mRNA [NM_016495]
A_23_P111297	0.023	up	1.33	RPP40	0.000842206	up	1.75	RPP40	0.00329	down	-2.1	RPP40	0	ref|NM_006638|gb|BC017871|ens|ENST00000464646|ens|ENST00000380053	TGAGCCAAGCACAGTGGTGGCAAAAGCTTATTTGTGTACAATCACTGGCTTCATACTTCC	RPP40	NM_006638	ref|Homo sapiens ribonuclease P/MRP 40kDa subunit (RPP40), mRNA [NM_006638]
A_23_P111311	0.00918	up	5.52	AKAP12	na	na	na	na	na	na	na	na	8	ref|NM_144497|ref|NM_005100|gb|U81607|gb|CR936604	CACAGGAGGAGTTACAGAAACAAGAGAGAGAATCTGCAAAGTCAGAACTTACAGAATCTT	AKAP12	NM_144497	ref|Homo sapiens A kinase (PRKA) anchor protein 12 (AKAP12), transcript variant 2, mRNA [NM_144497]
A_23_P111481	na	na	na	na	na	na	na	na	0.000136	down	-1.85	SRRT	8	ref|NM_015908|ref|NM_001128852|ref|NM_001128853|ref|NM_001128854	GTCCTATGAAGCTCTGAGAATTTTTTGTACGATCAGCCTTACTGCTAATAAAAGCACTTC	SRRT	NM_015908	ref|Homo sapiens serrate RNA effector molecule homolog (Arabidopsis) (SRRT), transcript variant 1, mRNA [NM_015908]
A_23_P111492	na	na	na	na	0.027691	down	-2.03	MOSPD3	0.047	up	2.71	MOSPD3	4	ref|NM_023948|ref|NM_001040097|ref|NM_001040098|ens|ENST00000493970	ATTCCCAGCCACTATGATGTCCAGGACCGCTTCCGCATTGAGCTGTCTGAGGAAGGAGCT	MOSPD3	NM_023948	ref|Homo sapiens motile sperm domain containing 3 (MOSPD3), transcript variant 1, mRNA [NM_023948]
A_23_P11160	0.0473	up	1.33	MAP7D3	na	na	na	na	na	na	na	na	8	ref|NM_024597|ens|ENST00000316077|gb|AK022711|thc|THC2474253	CTGTAAAGCCCCATCTTGGAACAGTCAGCACCTTTCATGCTCTTGTCAGTGTTTCCTTTT	MAP7D3	NM_024597	ref|Homo sapiens MAP7 domain containing 3 (MAP7D3), transcript variant 1, mRNA [NM_024597]
A_23_P111621	na	na	na	na	0.00180017	up	1.85	GTF2IRD1	na	na	na	na	8	ref|NM_005685|ref|NM_016328|gb|AB209389|gb|AY648295	TCGGATATGTATCGATGCCTTTTAGTTTTTCCAATGATTTTTACACTATATTCCTGCCAC	GTF2IRD1	NM_005685	ref|Homo sapiens GTF2I repeat domain containing 1 (GTF2IRD1), transcript variant 2, mRNA [NM_005685]
A_23_P111635	na	na	na	na	0.00136259	up	2.28	STYXL1	0.0347	up	1.35	STYXL1	4	ref|NM_016086|gb|AF188201|gb|CR615380|gb|BC024035	AAGATGATGATGATGATTCAGACTCTGATGGTGATGGCAAAGATCTTGTGCCTCAAGCAG	STYXL1	NM_016086	ref|Homo sapiens serine/threonine/tyrosine interacting-like 1 (STYXL1), mRNA [NM_016086]
A_23_P111672	0.0108	up	1.82	TES	0.00799498	up	1.75	TES	na	na	na	na	4	ref|NM_152829|ref|NM_015641|ens|ENST00000257721|ens|ENST00000358204	TTTTTTAATGTACCCTACCTTCAGTATTCTCTTTGTAAGTTGGTGACTTGCATCTGTGGC	TES	NM_152829	ref|Homo sapiens testis derived transcript (3 LIM domains) (TES), transcript variant 2, mRNA [NM_152829]
A_23_P111701	0.0418	up	1.28	GNG11	na	na	na	na	0.0392	up	1.52	GNG11	4	ref|NM_004126|ens|ENST00000248564|gb|CR622777|gb|CR596301	CTTGAGCATGACACTTCTTTCAGTATATTGCTTGATGCTTCAAATAAAGTTTTGTCTTGG	GNG11	NM_004126	ref|Homo sapiens guanine nucleotide binding protein (G protein), gamma 11 (GNG11), mRNA [NM_004126]
A_23_P111804	0.0202	up	1.69	PARP12	0.00473037	up	2.15	PARP12	na	na	na	na	4	ref|NM_022750|gb|CR602813|gb|BC044660|ens|ENST00000473341	TGATTCGGTTTCTCAGAGTCTCATGGCATCATAGTTTTTCCAGAATGACACAGTAGCCAC	PARP12	NM_022750	ref|Homo sapiens poly (ADP-ribose) polymerase family, member 12 (PARP12), mRNA [NM_022750]
A_23_P111811	0.0265	up	1.51	ING3	na	na	na	na	0.00721	down	-1.32	ING3	4	ref|NM_019071|gb|BC010851|gb|AL603623|ens|ENST00000427726	TCAACAGGTATATTCTGCTGCATGTACTGTACTCCAGAGCTGTTATGTAACACTGTATAT	ING3	NM_019071	ref|Homo sapiens inhibitor of growth family, member 3 (ING3), transcript variant 1, mRNA [NM_019071]
A_23_P111860	na	na	na	na	na	na	na	na	0.0484	up	4.8	RADIL	8	ref|NM_018059|gb|AK294745|gb|AK000997|gb|BC004919	TAGGTTCTATTTATATGGCAGATGACGTGAAATTGTGATGTTTGTTACAGAGCTTTTATG	RADIL	NM_018059	ref|Homo sapiens Ras association and DIL domains (RADIL), mRNA [NM_018059]
A_23_P111865	0.0152	up	2.01	ZSCAN21	0.0257617	up	2.09	ZSCAN21	na	na	na	na	4	ref|NM_145914|gb|AK301871|gb|AK075324|ens|ENST00000299672	TCAGACCTTCTTAAACATCAGAGAATGCACACAGAAGAGGCGCCATATCAGTGCAAAGAT	ZSCAN21	NM_145914	ref|Homo sapiens zinc finger and SCAN domain containing 21 (ZSCAN21), mRNA [NM_145914]
A_23_P111961	0.00879	up	1.55	MAK16	na	na	na	na	0.0127	down	-1.37	MAK16	4	ref|NM_032509|ens|ENST00000360128|gb|AK225476|gb|AL049422	AGAGCCCTGAATCCTTTAACTTTAATGCCATCTTAGGCCTGGAAGTTAGAGTGAGGGAAA	MAK16	NM_032509	ref|Homo sapiens MAK16 homolog (S. cerevisiae) (MAK16), mRNA [NM_032509]
A_23_P111995	na	na	na	na	0.00657037	up	1.94	LOXL2	na	na	na	na	8	ref|NM_002318|gb|AK098436|ens|ENST00000389131|gb|U89942	TGACTCATCTTCCTGTTGTTCCAATTCTGTGGGTTTTTGATTCAACGGTGCTATAACCAG	LOXL2	NM_002318	ref|Homo sapiens lysyl oxidase-like 2 (LOXL2), mRNA [NM_002318]
A_23_P112061	na	na	na	na	0.0342141	down	-1.44	HGSNAT	na	na	na	na	8	ref|NM_152419|ens|ENST00000379644|gb|BC012452|gb|AK074839	TTCTGTATTCCTCATGGTGCCAAACACAGTGCCTTCTACATTGCAGGCGCTGAATAAACA	HGSNAT	NM_152419	ref|Homo sapiens heparan-alpha-glucosaminide N-acetyltransferase (HGSNAT), mRNA [NM_152419]
A_23_P112103	na	na	na	na	na	na	na	na	0.041	up	1.61	GSDMD	8	ref|NM_024736|ref|NM_001166237|gb|AK291817|gb|AK096216	AGAGGTGGAGACCATCTCCAAGGAACTGGAGCTTTTGGACAGAGAGCTGTGCCAGCTGCT	GSDMD	NM_024736	ref|Homo sapiens gasdermin D (GSDMD), transcript variant 1, mRNA [NM_024736]
A_23_P112113	0.00885	down	-1.3	KIAA0196	0.00682092	up	1.27	KIAA0196	na	na	na	na	4	ref|NM_014846|gb|AK296970|ens|ENST00000377985|ens|ENST00000318410	GTGCTGTAACTGTTTTTCCTACTTCTTCAATGGAAGGATTGTCCTTAGATCTTCCCACCA	KIAA0196	NM_014846	ref|Homo sapiens KIAA0196 (KIAA0196), mRNA [NM_014846]
A_23_P112135	na	na	na	na	na	na	na	na	0.0122	down	-1.54	TRAM1	8	ref|NM_014294|ens|ENST00000262213|gb|CR601735|gb|BC000687	GTTCTTTTCAGTGTTCACATCTTGTTCCCCATTTCTCACTTGTGTCACCAGCTGTTTGTG	TRAM1	NM_014294	ref|Homo sapiens translocation associated membrane protein 1 (TRAM1), mRNA [NM_014294]
A_23_P11214	na	na	na	na	na	na	na	na	0.00457	down	-1.32	NKRF	8	ref|NM_017544|ens|ENST00000371527|ens|ENST00000304449|gb|AY208891	GAAGCTTGAACTGTTTGTTCTTGGTGCCTTGCAGAGAGACTCACAGCAACTCTCCATTAT	NKRF	NM_017544	ref|Homo sapiens NFKB repressing factor (NKRF), transcript variant 2, mRNA [NM_017544]
A_23_P112159	0.00555	up	1.5	EIF2C2	na	na	na	na	0.0375	down	-1.24	EIF2C2	4	ref|NM_012154|ref|NM_001164623|gb|BC125214|gb|BC125213	TTCCAGAATGCCTTCCGTCCCAGATTTCAAACTTGGATTTTGAACTGCAGACCTGTATGA	EIF2C2	NM_012154	ref|Homo sapiens eukaryotic translation initiation factor 2C, 2 (EIF2C2), transcript variant 1, mRNA [NM_012154]
A_23_P112187	na	na	na	na	0.0166907	up	2.12	FIBCD1	na	na	na	na	8	ref|NM_032843|ref|NM_001145106|ens|ENST00000372338|ens|ENST00000372337	AGGGCTGGGATGAGGCTTGTACAACCCCCACCACCAATTTCCCAGGGACTCCAGGGTCCT	FIBCD1	NM_032843	ref|Homo sapiens fibrinogen C domain containing 1 (FIBCD1), transcript variant 1, mRNA [NM_032843]
A_23_P112220	na	na	na	na	0.0283111	down	-23.03	INSL4	0.0097	down	-9.25	INSL4	4	ref|NM_002195|gb|AK291543|gb|L34838|gb|BC026254	GGTACGACATCAGAATTCATTCCTAATTTGTCACCAGAGCTGAAGAAACCACTGTCTGAA	INSL4	NM_002195	ref|Homo sapiens insulin-like 4 (placenta) (INSL4), mRNA [NM_002195]
A_23_P11224	0.0467	up	1.2	MMGT1	na	na	na	na	na	na	na	na	8	ref|NM_173470|ens|ENST00000433339|ens|ENST00000305963|gb|AL157477	GCTTCTCAGTGGCTTGACAGCATCTTCCTGGTTGTATGTGGCCTGTTTACATGATGTATT	MMGT1	NM_173470	ref|Homo sapiens membrane magnesium transporter 1 (MMGT1), mRNA [NM_173470]
A_23_P112241	0.0152	down	-1.94	DNAJB5	0.0159463	down	-3.58	DNAJB5	0.0348	up	1.59	DNAJB5	0	ref|NM_012266|ref|NM_001135005|ref|NM_001135004|ens|ENST00000454002	GCTGGGGGAAGACTGCTTCAGCCAGATCCTGGGGTGGGGTCTTTAGGTTTTCTCACTTTG	DNAJB5	NM_012266	ref|Homo sapiens DnaJ (Hsp40) homolog, subfamily B, member 5 (DNAJB5), transcript variant 3, mRNA [NM_012266]
A_23_P112260	na	na	na	na	0.0457354	up	1.63	GNG10	na	na	na	na	8	ref|NM_001017998|ref|NM_004125|gb|BC072671|ens|ENST00000374293	CTAGATCCTGTGCTTTACTCTGAAGACTCTAGGAGAGAAGTTTGCTGAGGAATGCCTTCA	GNG10	NM_001017998	ref|Homo sapiens guanine nucleotide binding protein (G protein), gamma 10 (GNG10), mRNA [NM_001017998]
A_23_P112289	na	na	na	na	na	na	na	na	0.0261	up	1.75	TMOD1	8	ref|NM_003275|ref|NM_001166116|ens|ENST00000395211|ens|ENST00000395208	GGGCAAATGGCTTATGTGAGGTAAGACACTAGAGGGATAAATTTCCAGATCAACATGGCT	TMOD1	NM_003275	ref|Homo sapiens tropomodulin 1 (TMOD1), transcript variant 1, mRNA [NM_003275]
A_23_P112341	0.0144	up	1.55	RMI1	na	na	na	na	na	na	na	na	8	ref|NM_024945|ens|ENST00000401650|ens|ENST00000325875|gb|AK022950	AAAGAGGGACTGTTTACCATTCTTCCACTGTGCTGTTATAAAGTTGTATTTGAAAGGTAA	RMI1	NM_024945	ref|Homo sapiens RMI1, RecQ mediated genome instability 1, homolog (S. cerevisiae) (RMI1), mRNA [NM_024945]
A_23_P11237	na	na	na	na	0.0229757	up	1.51	TAF1	na	na	na	na	8	ref|NM_004606|ref|NM_138923|gb|AM711895|gb|AM711892	GCATGCTTCAGGAGAACACAAGGATGGACATGGAAAATGAAGAAAGCATGATGTCCTATG	TAF1	NM_004606	ref|Homo sapiens TAF1 RNA polymerase II, TATA box binding protein (TBP)-associated factor, 250kDa (TAF1), transcript variant 1, mRNA [NM_004606]
A_23_P112412	0.00118	up	1.51	TEX10	na	na	na	na	na	na	na	na	8	ref|NM_017746|ref|NM_001161584|gb|AK298916|ens|ENST00000444730	GTGTTCAGGAACAGTGGCTCACAGACTTACATTACTGCTTTAACGTGTATATCACTGGGC	TEX10	NM_017746	ref|Homo sapiens testis expressed 10 (TEX10), transcript variant 1, mRNA [NM_017746]
A_23_P112429	na	na	na	na	0.038234	up	1.15	RPL35	na	na	na	na	8	ref|NM_007209|ens|ENST00000348462|ens|ENST00000373570|gb|CR456877	CTCTCTAAGATCCGAGTCGTCCGGAAATCCATTGCCCGTGTTCTCACAGTTATTAACCAG	RPL35	NM_007209	ref|Homo sapiens ribosomal protein L35 (RPL35), mRNA [NM_007209]
A_23_P112478	na	na	na	na	0.023875	down	-1.34	NUDT2	0.00901	up	1.31	NUDT2	4	ref|NM_001161|ref|NM_147172|ref|NM_147173|ens|ENST00000407581	AGGCATAGAAGCAGGCCAGCTGACCATTATTGAGGGGTTCAAAAGGGAACTCAATTATGT	NUDT2	NM_001161	ref|Homo sapiens nudix (nucleoside diphosphate linked moiety X)-type motif 2 (NUDT2), transcript variant 1, mRNA [NM_001161]
A_23_P112482	na	na	na	na	0.00680591	up	1.45	AQP3	na	na	na	na	8	ref|NM_004925|gb|CR614710|gb|AK095363|ens|ENST00000297991	AATTTGGGTCAATACATCCTTTTGTCTCCCAAGGGAAGAGAATGGGCAGCAGGTATGTGT	AQP3	NM_004925	ref|Homo sapiens aquaporin 3 (Gill blood group) (AQP3), mRNA [NM_004925]
A_23_P112512	0.0383	up	1.57	MCART1	na	na	na	na	na	na	na	na	8	ref|NM_033412|ref|NM_001034172|ref|NR_026540|ref|NR_026563	TGGCTGGAACGGGACAGAAAACTGATAAATCTTTTCAGAGGTGCCCATCTGAATTACCAT	MCART1	NM_033412	ref|Homo sapiens mitochondrial carrier triple repeat 1 (MCART1), nuclear gene encoding mitochondrial protein, transcript variant 1, mRNA [NM_033412]
A_23_P112531	0.0131	down	-1.58	FAM102A	na	na	na	na	0.0483	up	1.46	FAM102A	4	ref|NM_001035254|ref|NM_203305|gb|AK074108|ens|ENST00000373084	AGTATATCAGAGATATTTTTGGAAAGGAGTTGGTCTATGCAATGTCAGTTTGGAATCTTC	FAM102A	NM_001035254	ref|Homo sapiens family with sequence similarity 102, member A (FAM102A), transcript variant 1, mRNA [NM_001035254]
A_23_P112548	na	na	na	na	na	na	na	na	0.0129	up	3.39	HDHD3	8	ref|NM_031219|gb|AK315401|gb|CR609038|ens|ENST00000238379	CCCACAAGGCCTGGAAAGAGGTGATTGTTAGGTTGCGCAGAGGTGGTCTTATCCAGCTCA	HDHD3	NM_031219	ref|Homo sapiens haloacid dehalogenase-like hydrolase domain containing 3 (HDHD3), mRNA [NM_031219]
A_23_P112554	na	na	na	na	0.00258071	up	1.94	COL15A1	na	na	na	na	8	ref|NM_001855|ens|ENST00000375001|gb|L25286|gb|BG104905	TCATATTTTAGTATGGTGTCTGTTTATGTAACTCTGACTTGCTGGAAAAGTTGAAACTCC	COL15A1	NM_001855	ref|Homo sapiens collagen, type XV, alpha 1 (COL15A1), mRNA [NM_001855]
A_23_P112596	na	na	na	na	na	na	na	na	0.0269	down	-1.55	ADK	8	ref|NM_001123|ref|NM_006721|gb|AK302706|gb|CR597304	GATCAAGACCAGAAAGAAATTATTGATACCAATGGAGCTGGAGATGCATTTGTTGGAGGT	ADK	NM_001123	ref|Homo sapiens adenosine kinase (ADK), transcript variant ADK-short, mRNA [NM_001123]
A_23_P112634	0.00276	down	-1.88	C4orf34	0.029488	down	-1.2	C4orf34	0.0339	up	1.51	C4orf34	0	ref|NM_174921|gb|AK307146|ens|ENST00000295958|gb|AK023351	GGGGTTGTCTGGGATTGTGTGAAAGAAAATTAGAACCACGCTGTATTTACATTTACCTTG	C4orf34	NM_174921	ref|Homo sapiens chromosome 4 open reading frame 34 (C4orf34), mRNA [NM_174921]
A_23_P112652	0.00279	up	1.27	CNOT10	0.0242449	down	-1.07	CNOT10	0.0159	down	-1.37	CNOT10	0	ref|NM_015442|gb|AK027026|gb|AK302196|gb|AK022576	ATTTACTGGCCATTTTAGTTGTATCACAGCAGAATGAATAAAAGATGGTGAAGGCTGTTA	CNOT10	NM_015442	ref|Homo sapiens CCR4-NOT transcription complex, subunit 10 (CNOT10), mRNA [NM_015442]
A_23_P112774	na	na	na	na	na	na	na	na	0.00126	up	3.13	PTP4A3	8	ref|NM_032611|ref|NM_007079|gb|AJ276554|ens|ENST00000329397	TCCCACACCAGCCAGGCTGGTCTCCTCTAGCCTGTTTGTTGTGGGGTGGGGGTATATTTT	PTP4A3	NM_032611	ref|Homo sapiens protein tyrosine phosphatase type IVA, member 3 (PTP4A3), transcript variant 1, mRNA [NM_032611]
A_23_P11279	na	na	na	na	na	na	na	na	0.0129	down	-2.08	ALG13	8	ref|NM_018466|ref|NM_001168385|ref|NM_001039210|ref|NR_033134	AGCACGCTTCCTGGGCTGTTACAGTCAATGGACTTATCAACACTGAAATGTTATCCTCCT	ALG13	NM_018466	ref|Homo sapiens asparagine-linked glycosylation 13 homolog (S. cerevisiae) (ALG13), transcript variant 2, mRNA [NM_018466]
A_23_P112798	na	na	na	na	na	na	na	na	0.0259	up	2.58	CRIP2	8	ref|NM_001312|gb|AK300092|gb|CR590577|gb|CR602967	TATGGAATCCTCTTCGGACCCAAGGGAGTGAACACCGGTGCGGTGGGCAGCTACATCTAT	CRIP2	NM_001312	ref|Homo sapiens cysteine-rich protein 2 (CRIP2), mRNA [NM_001312]
A_23_P112801	0.0213	down	-1.39	CHP	na	na	na	na	0.00258	up	2.19	CHP	4	ref|NM_007236|gb|AK000095|gb|BC080653|ens|ENST00000334660	CCCCCTTTTGGCTGTATAGCAAAGTGTTTTAATCCACGGTTGTGCCTTATTGTTCCATTA	CHP	NM_007236	ref|Homo sapiens calcium binding protein P22 (CHP), mRNA [NM_007236]
A_23_P112825	na	na	na	na	na	na	na	na	0.0283	up	1.19	LCMT1	8	ref|NM_016309|ref|NM_001032391|gb|CR611540|gb|CR600134	GACATGATGGAGTTGTACAACAGGTTACCTCGAGCTGAAGTGAGCAGGATAGAATCACTT	LCMT1	NM_016309	ref|Homo sapiens leucine carboxyl methyltransferase 1 (LCMT1), transcript variant 1, mRNA [NM_016309]
A_23_P11286	0.0053	down	-1.43	HNRNPH2	0.027908	down	-1.53	HNRNPH2	na	na	na	na	4	ref|NM_019597|ref|NM_001032393|ens|ENST00000395130|ens|ENST00000457902	CAAGTTAGTTATGTTGTAGGAGTGTACCTAAGCAGTAAGCGTATTTAGGTTAATGCAGTT	HNRNPH2	NM_019597	ref|Homo sapiens heterogeneous nuclear ribonucleoprotein H2 (H') (HNRNPH2), transcript variant 1, mRNA [NM_019597]
A_23_P112874	na	na	na	na	na	na	na	na	0.0369	down	-2.11	GPC5	8	ref|NM_004466|ens|ENST00000377067|gb|BC030584|gb|BC039730	GAAGAACCTTGATAATTTTGACCCACTGTAACTTAGCCACTGATGAACCTTAAAGCTGAG	GPC5	NM_004466	ref|Homo sapiens glypican 5 (GPC5), mRNA [NM_004466]
A_23_P112950	na	na	na	na	na	na	na	na	0.0199	down	-1.35	ATF7IP	8	ref|NM_018179|gb|AY337596|gb|BC053625|gb|BX648096	TTTTGGGCCTTTCTGTGATCCTCAGTCAACAGATGTGATCTCTTCTACCCAGAGCAGTTA	ATF7IP	NM_018179	ref|Homo sapiens activating transcription factor 7 interacting protein (ATF7IP), mRNA [NM_018179]
A_23_P113005	0.000516	up	4.8	EFNA1	0.0343557	down	-1.3	EFNA1	0.0289	up	1.86	EFNA1	0	ref|NM_004428|ref|NM_182685|ens|ENST00000368407|ens|ENST00000368406	ATGGAGAAAGAAGTGGAGACAGTCCTTTCCCACCATTCCTGCCTTTAAGCCAAAGAAACA	EFNA1	NM_004428	ref|Homo sapiens ephrin-A1 (EFNA1), transcript variant 1, mRNA [NM_004428]
A_23_P113034	na	na	na	na	na	na	na	na	0.0276	up	4.8	C10orf11	8	ref|NM_032024|ens|ENST00000429141|ens|ENST00000354343|ens|ENST00000372499	GTCAGCTTGGAAAAGGATGAGGAAGACTACAAGAGATACAGATGCTTTGTTCTGTACAAG	C10orf11	NM_032024	ref|Homo sapiens chromosome 10 open reading frame 11 (C10orf11), mRNA [NM_032024]
A_23_P113111	0.00135	down	-1.61	AR	0.0141387	up	1.74	AR	na	na	na	na	4	ref|NM_000044|ref|NM_001011645|ens|ENST00000396043|gb|M23263	AGCCACACAAACGTTTACTTATCTTATGCCACGGGAAGTTTAGAGAGCTAAGATTATCTG	AR	NM_000044	ref|Homo sapiens androgen receptor (AR), transcript variant 1, mRNA [NM_000044]
A_23_P113283	na	na	na	na	0.00830576	down	-2.14	ZMAT3	0.0187	up	2.59	ZMAT3	4	ref|NM_022470|ref|NM_152240|gb|AK122768|ens|ENST00000432729	ATTGAATTCTTTTTAGATCTAAGTAAAAATAGGTCAGCAGAGATTTCAGTTTCCCAGGGC	ZMAT3	NM_022470	ref|Homo sapiens zinc finger, matrin type 3 (ZMAT3), transcript variant 1, mRNA [NM_022470]
A_23_P11331	0.00745	down	-1.41	TCEAL8	na	na	na	na	0.0487	up	1.44	TCEAL8	4	ref|NM_153333|ref|NM_001006684|ens|ENST00000372685|ens|ENST00000360000	AATAATTTGCAACCAGCTTATGAGGGCAATGGGGGCACCTAAACTCTTGATGAAAGAACT	TCEAL8	NM_153333	ref|Homo sapiens transcription elongation factor A (SII)-like 8 (TCEAL8), transcript variant 1, mRNA [NM_153333]
A_23_P113317	na	na	na	na	na	na	na	na	0.000794	up	1.76	P4HTM	8	ref|NM_177938|ref|NM_177939|ens|ENST00000343546|ens|ENST00000383729	GGGCGAGACTGTTTTCCCTGTAGCAGATAACAGAACCTACGATGAAATGAGTCTGATTCA	P4HTM	NM_177938	ref|Homo sapiens prolyl 4-hydroxylase, transmembrane (endoplasmic reticulum) (P4HTM), transcript variant 3, mRNA [NM_177938]
A_23_P113417	0.0381	up	1.47	C17orf70	na	na	na	na	0.0163	up	1.6	C17orf70	4	ref|NM_025161|ref|NR_033338|gb|BC143861|ens|ENST00000443656	TTCTGGGGTTTGGACTTGGGGTGAGTTTGTAACTGTTGCTGCCACACCACCAGGAGCACC	C17orf70	NM_025161	ref|Homo sapiens chromosome 17 open reading frame 70 (C17orf70), transcript variant 2, mRNA [NM_025161]
A_23_P113471	na	na	na	na	na	na	na	na	0.03	up	1.83	FAAH2	8	ref|NM_174912|ens|ENST00000374900|gb|AK055766|gb|AF086253	CCAGCAGACAAGCAGAGAAACAACTGGGGAATTTATTGACTCATTTAGTTATTCTTTCTA	FAAH2	NM_174912	ref|Homo sapiens fatty acid amide hydrolase 2 (FAAH2), mRNA [NM_174912]
A_23_P113572	na	na	na	na	0.00555085	down	-1.5	CD19	0.0397	up	1.27	CD19	4	ref|NM_001770|ens|ENST00000380673|ens|ENST00000324662|gb|X13312	TACATGCCAGTGACACTTCCAGTCCCCTTTGTATTCCTTAAATAAACTCAATGAGCTCTT	CD19	NM_001770	ref|Homo sapiens CD19 molecule (CD19), mRNA [NM_001770]
A_23_P113613	0.0354	up	1.97	CDCP1	0.0350274	up	2.43	CDCP1	0.0473	up	1.73	CDCP1	0	ref|NM_022842|ens|ENST00000296129|gb|AK023834|gb|AF468010	CTTAATTTGTGGATGATACAGAAAGCCAGGCTTTGGGATACAAGTTCTTTCCTCTTCATT	CDCP1	NM_022842	ref|Homo sapiens CUB domain containing protein 1 (CDCP1), transcript variant 1, mRNA [NM_022842]
A_23_P113634	0.0488	up	1.16	CBFB	0.0338635	down	-1.73	CBFB	0.0182	down	-1.4	CBFB	0	ref|NM_001755|ref|NM_022845|ens|ENST00000412916|ens|ENST00000290858	AAATGTTCCTGTTACCATCCTAATGTAAATACTGGATTTTTCTGTCATTTAGCACCATGC	CBFB	NM_001755	ref|Homo sapiens core-binding factor, beta subunit (CBFB), transcript variant 2, mRNA [NM_001755]
A_23_P113777	na	na	na	na	na	na	na	na	0.00604	down	-2.73	ITGBL1	8	ref|NM_004791|gb|AK308194|ens|ENST00000376180|gb|AK298571	TCTGGCTTGGCTCAGAATATCCTTAACAATTACATGAGAGAGGTCTGGATTCTTATTTTT	ITGBL1	NM_004791	ref|Homo sapiens integrin, beta-like 1 (with EGF-like repeat domains) (ITGBL1), mRNA [NM_004791]
A_23_P113789	na	na	na	na	0.0413637	up	1.54	USP19	0.027	up	1.37	USP19	4	ref|NM_006677|gb|BC128088|gb|AK300425|gb|BC082241	CAAGCGCTTCTCCTTTCGTAGTTTTATCTGGCGTGACAAGATCAATGACTTGGTGGAGTT	USP19	NM_006677	ref|Homo sapiens ubiquitin specific peptidase 19 (USP19), mRNA [NM_006677]
A_23_P113803	na	na	na	na	0.0384825	down	-1.79	KATNA1	na	na	na	na	8	ref|NM_007044|gb|CR600129|gb|BC050428|ens|ENST00000367411	GCCTACAACTATGGAGGATTTCGAGATGGCTTTAAAAAAGGTTTCTAAGTCAGTGTCTGC	KATNA1	NM_007044	ref|Homo sapiens katanin p60 (ATPase-containing) subunit A 1 (KATNA1), mRNA [NM_007044]
A_23_P114057	na	na	na	na	na	na	na	na	0.0235	up	1.6	SEMA4C	8	ref|NM_017789|gb|AK126512|gb|AB051526|gb|AF370374	CCTAGGAGGAGGGCTCCTAACAGTGTAACTTATTGTGTCCCCGCGTATTTATTTGTTGTA	SEMA4C	NM_017789	ref|Homo sapiens sema domain, immunoglobulin domain (Ig), transmembrane domain (TM) and short cytoplasmic domain, (semaphorin) 4C (SEMA4C), mRNA [NM_017789]
A_23_P114095	na	na	na	na	0.00812348	up	2.18	MBTPS2	na	na	na	na	8	ref|NM_015884|gb|AK307143|ens|ENST00000379484|gb|AF019612	ACTCTGGATGGTTACAGCACGGTAATGTTTGCACTCATCTGACAGAATCCCTGAGTTACA	MBTPS2	NM_015884	ref|Homo sapiens membrane-bound transcription factor peptidase, site 2 (MBTPS2), mRNA [NM_015884]
A_23_P114155	0.0425	down	-1.15	GPKOW	na	na	na	na	0.000871	up	1.45	GPKOW	4	ref|NM_015698|ens|ENST00000327905|ens|ENST00000156109|gb|CR625229	CCATATGAGAAAGTTGCCTTCAGAAGGTGGGAAGATCATTGTTCCATCCTCTACTTCTGG	GPKOW	NM_015698	ref|Homo sapiens G patch domain and KOW motifs (GPKOW), mRNA [NM_015698]
A_23_P114232	na	na	na	na	0.0151219	down	-1.35	PRDX4	0.0492	down	-1.19	PRDX4	4	ref|NM_006406|ens|ENST00000418872|ens|ENST00000379341|ens|ENST00000439422	ATCTTCCTGTGGGTAGATCAGTGGATGAGACACTACGTTTGGTTCAAGCATTCCAGTACA	PRDX4	NM_006406	ref|Homo sapiens peroxiredoxin 4 (PRDX4), mRNA [NM_006406]
A_23_P114405	na	na	na	na	0.0228811	down	-1.38	MORF4L2	0.0418	down	-1.36	MORF4L2	4	ref|NM_012286|ref|NM_001142418|ref|NM_001142422|ref|NM_001142429	TAAGCTCCTTTTCTCATTTCAAAGTTGCTACCAGTGTATGCAGTAATTAGAACAAAGAAG	MORF4L2	NM_012286	ref|Homo sapiens mortality factor 4 like 2 (MORF4L2), transcript variant 2, mRNA [NM_012286]
A_23_P114414	0.000372	up	1.87	LONRF3	0.00544343	up	1.79	LONRF3	0.0317	up	1.22	LONRF3	0	ref|NM_001031855|ref|NM_024778|gb|AX747177|gb|AK097641	CACCTTCCCCACTGCCGTCGGGGGGAGTCTTCTTGTAAATATATCTAATTGCAATAACAT	LONRF3	NM_001031855	ref|Homo sapiens LON peptidase N-terminal domain and ring finger 3 (LONRF3), transcript variant 1, mRNA [NM_001031855]
A_23_P1145	0.00675	up	1.36	MTPAP	0.0343566	up	1.35	MTPAP	0.035	down	-1.48	MTPAP	0	ref|NM_018109|gb|AL122121|ens|ENST00000263063|ens|ENST00000358107	GCTGCTACATTGTGTAAAGAACTGGGCTTAGCCTATCAAATGGTCTGTGGACTTACTTGG	MTPAP	NM_018109	ref|Homo sapiens mitochondrial poly(A) polymerase (MTPAP), nuclear gene encoding mitochondrial protein, mRNA [NM_018109]
A_23_P114670	na	na	na	na	na	na	na	na	0.0304	up	1.47	ARHGEF16	8	ref|NM_014448|gb|D89016|gb|BC051838|ens|ENST00000340401	ACAGGAGGCACCAATAGCGATTATTGGGGGCAATGCGAGGTCTCCTCCTATGCCCTTCCT	ARHGEF16	NM_014448	ref|Homo sapiens Rho guanine exchange factor (GEF) 16 (ARHGEF16), mRNA [NM_014448]
A_23_P114689	0.00841	down	-2.12	ASAP3	0.00136894	down	-1.46	ASAP3	0.00451	up	2.15	ASAP3	0	ref|NM_017707|ref|NM_001143778|gb|CR609624|gb|BC023519	CAATGAGAAAGCAGATACACCTAAGCCATCATCAACCACTAACATCTCAACTTGCCAGTT	ASAP3	NM_017707	ref|Homo sapiens ArfGAP with SH3 domain, ankyrin repeat and PH domain 3 (ASAP3), transcript variant 1, mRNA [NM_017707]
A_23_P114740	na	na	na	na	na	na	na	na	0.0252	up	11.15	CFH	8	ref|NM_000186|ref|NM_002113|gb|BC029390|ens|ENST00000367429	TTGGATTAATTTGTGAAAATGTAATTATAAGCTGAGACCGGTGGCTCTCTTCTTAAAAGC	CFH	NM_000186	ref|Homo sapiens complement factor H (CFH), transcript variant 1, mRNA [NM_000186]
A_23_P114826	na	na	na	na	0.00269197	down	-1.55	MRPS15	na	na	na	na	8	ref|NM_031280|ens|ENST00000373116|gb|AK315441|gb|AB209905	AATGAGCATTGACCAGAGGAAAAAGATGCTCAAAAACCTCCGTAACACCAACTATGATGT	MRPS15	NM_031280	ref|Homo sapiens mitochondrial ribosomal protein S15 (MRPS15), nuclear gene encoding mitochondrial protein, mRNA [NM_031280]
A_23_P114839	0.000247	up	3.25	FHL3	na	na	na	na	na	na	na	na	8	ref|NM_004468|gb|CR590698|gb|CR625653|gb|BC014501	AGGGCAGCAGTTCACCTCCCGGGATGAAGATCCCTACTGTGTGGCCTGTTTTGGAGAACT	FHL3	NM_004468	ref|Homo sapiens four and a half LIM domains 3 (FHL3), mRNA [NM_004468]
A_23_P114883	na	na	na	na	na	na	na	na	0.0389	up	3.73	FMOD	8	ref|NM_002023|ens|ENST00000354955|ens|ENST00000435105|gb|CR599949	CCAGGGCTCTTCAGAAAGCATCTGCATGTGAACACCATCATGCCTTTATAAAGGATCCTT	FMOD	NM_002023	ref|Homo sapiens fibromodulin (FMOD), mRNA [NM_002023]
A_23_P114903	na	na	na	na	na	na	na	na	0.0292	up	1.67	HSPA6	8	ref|NM_002155|ref|NR_024151|gb|CR623806|ens|ENST00000309758	CAAAATGCAAGACAAGTGTCGGGAAGTCCTTGCCTGGCTGGAGCACAACCAGCTGGCAGA	HSPA6	NM_002155	ref|Homo sapiens heat shock 70kDa protein 6 (HSP70B') (HSPA6), mRNA [NM_002155]
A_23_P114929	0.0288	down	-1.16	BRP44	0.000266033	down	-1.31	BRP44	na	na	na	na	4	ref|NM_015415|ref|NM_001143674|ref|NR_026550|gb|CR594136	AAATTGGAGTCTGTTTGCTGTTAATTTCTTTGTGGGGGCAGCAGGAGCCTCTCAGCTTTT	BRP44	NM_015415	ref|Homo sapiens brain protein 44 (BRP44), transcript variant 2, mRNA [NM_015415]
A_23_P114947	0.00518	up	2.71	RGS2	0.0154493	down	-1.85	RGS2	0.0169	down	-1.58	RGS2	0	ref|NM_002923|ens|ENST00000235382|gb|CR619003|gb|CR595811	TAGATCTGGGATTATGTGGCCTTAGGTAGCTGGTTGTACATCTTTCCCTAAATCGATCCA	RGS2	NM_002923	ref|Homo sapiens regulator of G-protein signaling 2, 24kDa (RGS2), mRNA [NM_002923]
A_23_P114952	na	na	na	na	na	na	na	na	0.00155	up	1.34	TMEM9	8	ref|NM_016456|gb|CR623586|gb|CR619092|gb|AK091726	TGGCTATTTTGATTAGGGAAGAGGGATGTGGTCTCTGATCTCTGTTGTCTTCTTGGGTCT	TMEM9	NM_016456	ref|Homo sapiens transmembrane protein 9 (TMEM9), mRNA [NM_016456]
A_23_P115036	na	na	na	na	na	na	na	na	0.0204	up	1.81	IPO13	8	ref|NM_014652|gb|AX747063|ens|ENST00000372339|ens|ENST00000372343	TGTGGGGAAGTAGAGTCTGTGGGAAAGGTGGTACAGGAAGACGGTCGTATGCTGCTCATA	IPO13	NM_014652	ref|Homo sapiens importin 13 (IPO13), mRNA [NM_014652]
A_23_P115046	na	na	na	na	0.00151782	up	2.29	EIF2B3	na	na	na	na	8	ref|NM_020365|ref|NM_001166588|gb|CR601681|gb|AL834288	ATGAAGCCAGATATTGTGTGTATTCCTGATGATGCTGACATGGGAACTGCAGATTCTTTG	EIF2B3	NM_020365	ref|Homo sapiens eukaryotic translation initiation factor 2B, subunit 3 gamma, 58kDa (EIF2B3), transcript variant 1, mRNA [NM_020365]
A_23_P11507	0.00615	up	1.68	ZZZ3	0.00431098	up	1.71	ZZZ3	na	na	na	na	4	ref|NM_015534|gb|BX640766|gb|BC035079|ens|ENST00000420374	TCATGTGATGTGTACAAACTATGGTGAAAAGTGCCAGTGGTAGTAACTGTGTAAAGTTTC	ZZZ3	NM_015534	ref|Homo sapiens zinc finger, ZZ-type containing 3 (ZZZ3), mRNA [NM_015534]
A_23_P115105	0.0462	up	1.16	C1orf144	na	na	na	na	0.00576	down	-1.78	C1orf144	4	ref|NM_015609|ref|NM_001114600|gb|BC010631|ens|ENST00000401088	GGTACATTTCCTGTGTGCAATCAGTACCTTGAAGGCAGAACATTCTGAATAAAGTTGGAA	C1orf144	NM_015609	ref|Homo sapiens chromosome 1 open reading frame 144 (C1orf144), transcript variant 2, mRNA [NM_015609]
A_23_P115124	na	na	na	na	0.0107672	down	-1.27	TRIM11	na	na	na	na	8	ref|NM_145214|ens|ENST00000284551|gb|AK097825|gb|CR606885	TTTGCAGGCCCACGTTCTGACTTGAAGCTTTCGTGGGCATGTTGCCATTGGGTTTTGCCC	TRIM11	NM_145214	ref|Homo sapiens tripartite motif-containing 11 (TRIM11), mRNA [NM_145214]
A_23_P115137	0.00869	down	-1.25	HBXIP	na	na	na	na	0.0095	up	1.25	HBXIP	4	ref|NM_006402|ens|ENST00000256644|ens|ENST00000369775|gb|AK054769	AGTGCACAAAATGGCCTCTTGATGCTCATATCTGTTCTTCAGCAGCCTGTCATAGGAACT	HBXIP	NM_006402	ref|Homo sapiens hepatitis B virus x interacting protein (HBXIP), mRNA [NM_006402]
A_23_P115149	na	na	na	na	0.0279213	down	-1.14	WDR77	0.0245	down	-1.69	WDR77	4	ref|NM_024102|ens|ENST00000421211|ens|ENST00000411751|ens|ENST00000235090	GCATCCCTGGGTTCTTGGAAGCAGCTCTTATGCTACTCATAGAGATGGGATTGACTTTAT	WDR77	NM_024102	ref|Homo sapiens WD repeat domain 77 (WDR77), mRNA [NM_024102]
A_23_P115167	0.00732	up	2.11	LRRC8B	na	na	na	na	na	na	na	na	8	ref|NM_015350|ref|NM_001134476|gb|BC030607|ens|ENST00000358200	GCTGCAGTGTTTACTTTTGGGGAAAAATAGCTTGATGAATTTGTCCCCTCATGTGGGTGA	LRRC8B	NM_015350	ref|Homo sapiens leucine rich repeat containing 8 family, member B (LRRC8B), transcript variant 1, mRNA [NM_015350]
A_23_P115223	na	na	na	na	0.00593273	up	1.84	HAX1	na	na	na	na	8	ref|NM_006118|ref|NM_001018837|gb|AK300676|gb|EU190982	TATTCCTGGGACGTTGGTTCCGGTCCCGGTAGCCTTGTTAACCCTCAGAGGCCTTCAAGT	HAX1	NM_006118	ref|Homo sapiens HCLS1 associated protein X-1 (HAX1), transcript variant 1, mRNA [NM_006118]
A_23_P115261	na	na	na	na	0.00239086	up	11.13	AGT	0.0107	up	18.98	AGT	4	ref|NM_000029|ens|ENST00000430091|ens|ENST00000366667|gb|CR618811	TGTTCCAAAAAGAATTCCAACCGACCAGCTTGTTTGTGAAACAAAAAAGTGTTCCCTTTT	AGT	NM_000029	ref|Homo sapiens angiotensinogen (serpin peptidase inhibitor, clade A, member 8) (AGT), mRNA [NM_000029]
A_23_P115331	0.00659	down	-2.41	AHDC1	0.0186922	down	-1.9	AHDC1	na	na	na	na	4	ref|NM_001029882|gb|BC064935|ens|ENST00000374011|ens|ENST00000247087	ACCCATCTCCTCCACGCAGAAGCCGAAGGTGAGCCCTTTCTGCACAAAACCAGCAATTGG	AHDC1	NM_001029882	ref|Homo sapiens AT hook, DNA binding motif, containing 1 (AHDC1), mRNA [NM_001029882]
A_23_P115375	0.00692	up	1.58	HIST2H3D	na	na	na	na	na	na	na	na	8	ref|NM_001123375|ref|NM_001005464|ref|NM_021059|ens|ENST00000331491	TGGTGGGGCTGTTCGAAGACACGAACCTGTGCGCCATCCATGCCAAGCGCGTGACCATCA	HIST2H3D	NM_001123375	ref|Homo sapiens histone cluster 2, H3d (HIST2H3D), mRNA [NM_001123375]
A_23_P11543	0.00689	down	-1.42	FUCA1	0.0219175	down	-1.38	FUCA1	0.0217	up	1.85	FUCA1	0	ref|NM_000147|ens|ENST00000374475|ens|ENST00000374479|gb|AK225468	TTCTCTGATAACCTACTTGCTTACTCAATGCCTTTAAGCCAAGTCACCCTGTTGCCTATG	FUCA1	NM_000147	ref|Homo sapiens fucosidase, alpha-L- 1, tissue (FUCA1), mRNA [NM_000147]
A_23_P115492	na	na	na	na	0.00114826	down	-1.97	VASH2	na	na	na	na	8	ref|NM_024749|ref|NM_001136474|ref|NM_001136475|ens|ENST00000366965	AGTCAACAGATGTTATTTCAGTCTCAGTGCATCTCCTCTGGCTTTCTTTGACTGAAGGTG	VASH2	NM_024749	ref|Homo sapiens vasohibin 2 (VASH2), transcript variant 1, mRNA [NM_024749]
A_23_P115608	na	na	na	na	na	na	na	na	0.0275	down	-1.52	ARHGAP21	8	ref|NM_020824|ens|ENST00000320481|ens|ENST00000396432|gb|AB037845	TCGGATAGTTGTATACAAATGAGCAAGGTATTTGTTGCAACTTACTACATAGCATATACC	ARHGAP21	NM_020824	ref|Homo sapiens Rho GTPase activating protein 21 (ARHGAP21), mRNA [NM_020824]
A_23_P115726	0.0155	up	1.57	SLC16A9	na	na	na	na	na	na	na	na	8	ref|NM_194298|ens|ENST00000395348|ens|ENST00000395347|ens|ENST00000298215	GGGATTTTATAAACCAATAGCCAAGTGTTCTTTAAATAGGAGGCACCCTTCCCATTGTGC	SLC16A9	NM_194298	ref|Homo sapiens solute carrier family 16, member 9 (monocarboxylic acid transporter 9) (SLC16A9), mRNA [NM_194298]
A_23_P115842	na	na	na	na	na	na	na	na	0.0296	down	-1.8	CCAR1	8	ref|NM_018237|gb|BC144118|ens|ENST00000265872|gb|BC130626	CCAAGGAGAATGGTGCCAGTGTATGATAAAATCCATGTAGTGATGAGGAATGGTGTTAAA	CCAR1	NM_018237	ref|Homo sapiens cell division cycle and apoptosis regulator 1 (CCAR1), mRNA [NM_018237]
A_23_P115872	0.00971	down	-1.42	CEP55	0.0240516	down	-2.27	CEP55	na	na	na	na	4	ref|NM_018131|ref|NM_001127182|ens|ENST00000447994|ens|ENST00000371485	GTAAACCAAAAACTTTTAAATTTCTTCAGGTTTTCTAACATGCTTACCACTGGGCTACTG	CEP55	NM_018131	ref|Homo sapiens centrosomal protein 55kDa (CEP55), transcript variant 1, mRNA [NM_018131]
A_23_P115919	0.00887	down	-1.24	PHYH	0.0162382	up	1.39	PHYH	na	na	na	na	4	ref|NM_001037537|ref|NM_006214|gb|CR623416|ens|ENST00000396920	TTTCGAGCTCGACTTGTGAAAGGAGAAAGAACCAATCTTTGAAATAGCCATCTGCTATAA	PHYH	NM_001037537	ref|Homo sapiens phytanoyl-CoA 2-hydroxylase (PHYH), transcript variant 2, mRNA [NM_001037537]
A_23_P115922	0.00772	down	-1.42	EIF4EBP2	na	na	na	na	na	na	na	na	8	ref|NM_004096|ens|ENST00000373218|gb|CR610579|gb|BC005057	GTTGATGTCTCAGGAATAAGCTGGATCTCCAATGTTTTGGGGATGCTTTGAGTCTCAAAA	EIF4EBP2	NM_004096	ref|Homo sapiens eukaryotic translation initiation factor 4E binding protein 2 (EIF4EBP2), mRNA [NM_004096]
A_23_P115955	na	na	na	na	0.0308967	up	1.34	MRPL21	0.0406	up	1.1	MRPL21	4	ref|NM_181515|ref|NM_181514|ens|ENST00000450904|ens|ENST00000362034	AAAGGAAAAACTTCAAGAAGAAAAGAATCGTCACGACCCCGCAGACTGTCCTCCGGATAA	MRPL21	NM_181515	ref|Homo sapiens mitochondrial ribosomal protein L21 (MRPL21), nuclear gene encoding mitochondrial protein, transcript variant 1, mRNA [NM_181515]
A_23_P116037	na	na	na	na	na	na	na	na	0.012	up	2.37	TM7SF2	8	ref|NM_003273|gb|BC038353|gb|AF023676|gb|AK296441	ACGAGAGCTCAACCCTCGTATCTGTTTCTTCGACTTCAAATATTTCTGTGAACTGCGACC	TM7SF2	NM_003273	ref|Homo sapiens transmembrane 7 superfamily member 2 (TM7SF2), mRNA [NM_003273]
A_23_P116091	na	na	na	na	na	na	na	na	0.0479	up	1.61	DPP3	8	ref|NM_130443|ref|NM_005700|gb|AK297199|gb|AK021449	ACACGGTGCTGCTGCGTAAGGAATCTCGGAAGCTCATTGTTCAGCCCAACACTCGCCTTG	DPP3	NM_130443	ref|Homo sapiens dipeptidyl-peptidase 3 (DPP3), transcript variant 2, mRNA [NM_130443]
A_23_P116168	0.0117	up	1.43	KIAA1826	na	na	na	na	na	na	na	na	8	ref|NM_032424|gb|AL834523|ens|ENST00000301919|gb|CR614328	AGAGAAGTGACACAGAGTAAATGGCTGATCTTCTATATTGTAGTATATTTTGTCCTTCCC	KIAA1826	NM_032424	ref|Homo sapiens KIAA1826 (KIAA1826), mRNA [NM_032424]
A_23_P116207	0.0379	up	1.2	C11orf60	0.00551784	up	3.62	C11orf60	na	na	na	na	4	ref|NM_020153|ref|NM_001168618|gb|CR607003|ens|ENST00000264020	AGAGTACATTGACATGATCTGTGCCATTCTAGACATCCCTGTCTACAAGAGTCGGATCCA	C11orf60	NM_020153	ref|Homo sapiens chromosome 11 open reading frame 60 (C11orf60), transcript variant 1, mRNA [NM_020153]
A_23_P116264	na	na	na	na	0.00345098	down	-3.12	NRGN	na	na	na	na	8	ref|NM_006176|ref|NM_001126181|ens|ENST00000412681|ens|ENST00000284292	GTTGTTTTGGTTTCGGACGACCCTTGCTCTGACCGGAAGAGAAGTCCCTATCCCACACCT	NRGN	NM_006176	ref|Homo sapiens neurogranin (protein kinase C substrate, RC3) (NRGN), transcript variant 1, mRNA [NM_006176]
A_23_P11629	na	na	na	na	0.0327303	up	2.75	TMEM61	na	na	na	na	8	ref|NM_182532|ens|ENST00000371268|gb|BC029775|thc|THC2475259	AAGGCTCCTAGCAGGTCCTGAATCCAGAGACAAAAATGCTGTGCCTTCTCCAGAGTCTTA	TMEM61	NM_182532	ref|Homo sapiens transmembrane protein 61 (TMEM61), mRNA [NM_182532]
A_23_P116387	0.00869	down	-2.83	INCENP	na	na	na	na	na	na	na	na	8	ref|NM_001040694|ref|NM_020238|ens|ENST00000394818|ens|ENST00000278849	TTTAGTCTTTGGCATTTTAGCGTTTGGGAGGTAGATTAATAAAGTATATTCCTTCAAGCC	INCENP	NM_001040694	ref|Homo sapiens inner centromere protein antigens 135/155kDa (INCENP), transcript variant 1, mRNA [NM_001040694]
A_23_P116430	0.0473	down	-1.32	USH1C	0.00684607	down	-7.3	USH1C	na	na	na	na	4	ref|NM_005709|ref|NM_153676|gb|AB006955|gb|AF039699	AGCTGCTGAGCGGCATGGTGGCATTGTGAAAGGGGACGAGATCATGGCAATCAACGGCAA	USH1C	NM_005709	ref|Homo sapiens Usher syndrome 1C (autosomal recessive, severe) (USH1C), transcript variant 1, mRNA [NM_005709]
A_23_P11652	0.0257	up	1.51	USP1	na	na	na	na	na	na	na	na	8	ref|NM_003368|ref|NM_001017415|ref|NM_001017416|ens|ENST00000371146	TTGGGCATGGACTAATTTGTATCTGTTTAACTCATATTCTGCACGATCTGTATATAGTAC	USP1	NM_003368	ref|Homo sapiens ubiquitin specific peptidase 1 (USP1), transcript variant 1, mRNA [NM_003368]
A_23_P116602	0.0164	down	-2.11	USP35	0.0018945	down	-1.89	USP35	na	na	na	na	4	ref|NM_020798|gb|AB037793|ens|ENST00000263311|ens|ENST00000441408	TGCTGTAGCCCCCTTCTAACTTCTAACCGAAGACAAGACAGACACCCATGTTCTTAAATA	USP35	NM_020798	ref|Homo sapiens ubiquitin specific peptidase 35 (USP35), mRNA [NM_020798]
A_23_P116614	na	na	na	na	0.00326394	up	1.84	ME3	0.00617	up	1.47	ME3	4	ref|NM_001014811|ref|NM_006680|ref|NM_001161586|ens|ENST00000393324	CCCAAGGAAGCCATGAATGTTCAGACGGTCTGAGGCAGTCTCAGAGGCTAGTATGGGGCT	ME3	NM_001014811	ref|Homo sapiens malic enzyme 3, NADP(+)-dependent, mitochondrial (ME3), nuclear gene encoding mitochondrial protein, transcript variant 2, mRNA [NM_001014811]
A_23_P116743	na	na	na	na	0.0234156	down	-2.18	LOC338799	na	na	na	na	8	ref|NR_002809|gb|AK095700|gb|AK094482|gb|BC038786	TTCCAACCTCCATTGCACTGCTTCCCCTAAGACTGTGACCTCCTGGAAGGCTGGAGCACA	LOC338799	NR_002809	ref|Homo sapiens hypothetical LOC338799 (LOC338799), non-coding RNA [NR_002809]
A_23_P116829	na	na	na	na	0.0387325	down	-1.85	UBE2N	na	na	na	na	8	ref|NM_003348|ens|ENST00000318066|ens|ENST00000393133|gb|CR594944	CTGAAAATTTCATCTGTAACCTTTCATGTGTGTTAAGAAACACTGATCTGATCATTTGGG	UBE2N	NM_003348	ref|Homo sapiens ubiquitin-conjugating enzyme E2N (UBC13 homolog, yeast) (UBE2N), mRNA [NM_003348]
A_23_P116840	0.00263	up	1.92	C12orf44	na	na	na	na	na	na	na	na	8	ref|NM_021934|ref|NM_001098673|ens|ENST00000336854|ens|ENST00000433776	CTGGGGCAGATGTCCTTGGAGTTCTACCAGAAGAAGAAGTCTCGCTGGCCATTCTCAGAC	C12orf44	NM_021934	ref|Homo sapiens chromosome 12 open reading frame 44 (C12orf44), transcript variant 1, mRNA [NM_021934]
A_23_P11685	na	na	na	na	na	na	na	na	0.03	up	1.59	PLA2G4A	8	ref|NM_024420|gb|AK302938|ens|ENST00000442353|ens|ENST00000367466	GAAATGGCAGCAGTTTCTGATGCTGAGGCAGTTTGCAATCCCATGACAACTGGATTTAAA	PLA2G4A	NM_024420	ref|Homo sapiens phospholipase A2, group IVA (cytosolic, calcium-dependent) (PLA2G4A), mRNA [NM_024420]
A_23_P116898	na	na	na	na	0.000929578	down	-3.49	A2M	0.00075	down	-2.35	A2M	4	ref|NM_000014|gb|AK307832|gb|CR621613|ens|ENST00000318602	CTTGTTCTTCACGGTTCTGCAAGATGTCCCAGTAAGAGATCTGAAACCAGCCATAGTGAA	A2M	NM_000014	ref|Homo sapiens alpha-2-macroglobulin (A2M), mRNA [NM_000014]
A_23_P117037	0.0433	up	1.1	LETMD1	0.000947801	down	-1.47	LETMD1	na	na	na	na	4	ref|NM_015416|ref|NM_001024668|gb|CR603920|gb|CR605694	CTTCACTGGCATGGGCTAACCACTTCTTTTTCAAACCCTCTGAACACCTTTTTCTGATGG	LETMD1	NM_015416	ref|Homo sapiens LETM1 domain containing 1 (LETMD1), transcript variant 1, mRNA [NM_015416]
A_23_P11705	0.00347	down	-1.68	BSDC1	na	na	na	na	na	na	na	na	8	ref|NM_018045|ref|NM_001143888|ref|NM_001143889|ref|NM_001143890	TTTTTTGACGGGATGGGGTTTTTCTCTTTGTAATTATTTCTTTAGTTTAATTAACCTTTT	BSDC1	NM_018045	ref|Homo sapiens BSD domain containing 1 (BSDC1), transcript variant 2, mRNA [NM_018045]
A_23_P117068	0.00857	down	-1.52	SNRPF	na	na	na	na	na	na	na	na	8	ref|NM_003095|ens|ENST00000266735|gb|AK311752|gb|CR456751	AGCTTGCAAATACAGAAGAATACATAGATGGAGCTTTGTCTGGACATCTGGGTGAAGTTT	SNRPF	NM_003095	ref|Homo sapiens small nuclear ribonucleoprotein polypeptide F (SNRPF), mRNA [NM_003095]
A_23_P117082	0.0334	down	-1.37	HEBP1	na	na	na	na	na	na	na	na	8	ref|NM_015987|ens|ENST00000014930|gb|CR613893|gb|AF117615	AAGGGGGAAAATGTGATTTGTGCCTGATCTTTCATCTGTGATTCTTATAAGAGCTTTGTC	HEBP1	NM_015987	ref|Homo sapiens heme binding protein 1 (HEBP1), mRNA [NM_015987]
A_23_P117225	0.00656	down	-1.37	ERCC5	0.0323734	down	-1.28	ERCC5	na	na	na	na	4	ref|NM_000123|gb|AB209312|gb|AK294708|ens|ENST00000375954	ATTTTTGGGGGAGACCTGCCTCTCAGAATCATCTGATGGATCTTCAAGTGAAGATGCTGA	ERCC5	NM_000123	ref|Homo sapiens excision repair cross-complementing rodent repair deficiency, complementation group 5 (ERCC5), mRNA [NM_000123]
A_23_P117274	na	na	na	na	0.041052	up	1.67	MIPEP	na	na	na	na	8	ref|NM_005932|ens|ENST00000382172|gb|DQ893610|gb|DQ896839	CTTTTCCATGAAATGGGACATGCCATGCATTCAATGCTAGGACGTACTCGTTACCAACAC	MIPEP	NM_005932	ref|Homo sapiens mitochondrial intermediate peptidase (MIPEP), nuclear gene encoding mitochondrial protein, mRNA [NM_005932]
A_23_P11729	0.0075	down	-1.54	ZBTB7B	0.00219419	up	3.82	ZBTB7B	0.00617	up	1.43	ZBTB7B	0	ref|NM_015872|gb|AK304762|gb|AF007833|gb|CR749303	TTCCAATTCCAAGCTAAGAAGGTATTGGGGCAGAGGCTCCCCAAATTGGGGTGATCCCCC	ZBTB7B	NM_015872	ref|Homo sapiens zinc finger and BTB domain containing 7B (ZBTB7B), mRNA [NM_015872]
A_23_P117424	na	na	na	na	0.036076	down	-1.82	DCAF11	na	na	na	na	8	ref|NM_025230|ref|NM_001163484|ref|NM_181357|ref|NR_028099	TTAATCATGTTTGAATGTTAGGGGTTGGATCCTAGAGTAGATGCCTGAGGCCACATCTGA	DCAF11	NM_025230	ref|Homo sapiens DDB1 and CUL4 associated factor 11 (DCAF11), transcript variant 1, mRNA [NM_025230]
A_23_P117494	na	na	na	na	na	na	na	na	0.0356	down	-1.34	MTHFD1	8	ref|NM_005956|gb|CR613709|ens|ENST00000216605|gb|FV193016	AAGCTACTTTGAAAGTCTGGCCAGTGTCTATTCAGGCCCACTGGGAGTTAGGAAGTATAA	MTHFD1	NM_005956	ref|Homo sapiens methylenetetrahydrofolate dehydrogenase (NADP+ dependent) 1, methenyltetrahydrofolate cyclohydrolase, formyltetrahydrofolate synthetase (MTHFD1), mRNA [NM_005956]
A_23_P117506	na	na	na	na	0.000530488	up	1.55	DHRS7	na	na	na	na	8	ref|NM_016029|gb|AF126782|gb|CR616087|ens|ENST00000360557	CTGGAGAAGTCACAAAGACTATAGGCAATAATGGAGACCAGTCCCACAAGATGACAACCA	DHRS7	NM_016029	ref|Homo sapiens dehydrogenase/reductase (SDR family) member 7 (DHRS7), mRNA [NM_016029]
A_23_P117582	na	na	na	na	na	na	na	na	0.0213	down	-1.29	JDP2	8	ref|NM_130469|ref|NM_001135049|ref|NM_001135047|ref|NM_001135048	GGGGTGCATTTCCATCCTTGTAAACCCTTCATAGTACTCAGTCCTGTATCGCTCAGTAAA	JDP2	NM_130469	ref|Homo sapiens Jun dimerization protein 2 (JDP2), transcript variant 1, mRNA [NM_130469]
A_23_P117599	0.0452	down	-1.16	AHSA1	0.0190682	down	-1.14	AHSA1	na	na	na	na	4	ref|NM_012111|gb|AK300766|ens|ENST00000216479|gb|AK313824	ATTAGTGTGAGCCTTGCCAAAGATGAGCCTGACACAAATCTCGTGGCCTTAATGAAGGAA	AHSA1	NM_012111	ref|Homo sapiens AHA1, activator of heat shock 90kDa protein ATPase homolog 1 (yeast) (AHSA1), mRNA [NM_012111]
A_23_P117662	0.0404	up	1.76	HDC	0.0195509	down	-4.33	HDC	0.0349	up	1.86	HDC	0	ref|NM_002112|gb|AK027221|ens|ENST00000267845|gb|X54297	CCGAGGGTAGACAGGCAGCTTCTGTGGTTCAGCTTGTGACATGATATATAACACAGAAAT	HDC	NM_002112	ref|Homo sapiens histidine decarboxylase (HDC), mRNA [NM_002112]
A_23_P117734	na	na	na	na	0.0323344	up	1.17	LYSMD4	0.00871	up	1.32	LYSMD4	4	ref|NM_152449|gb|BC084545|ens|ENST00000332728|ens|ENST00000344791	AATCTCTGCAATAGGAAATGTTTCGATCATGCAAGTGCTTTCCCAGCCAAATGTCTGTGC	LYSMD4	NM_152449	ref|Homo sapiens LysM, putative peptidoglycan-binding, domain containing 4 (LYSMD4), mRNA [NM_152449]
A_23_P117778	na	na	na	na	na	na	na	na	0.0245	up	2	UBL7	8	ref|NM_032907|ref|NM_201265|gb|CR602642|gb|BC030055	AGGCCTCAGCAGTGACCCTATTGCTCTTGGGGTTCTCCAGGACAAGGACCTCTTCTCTGT	UBL7	NM_032907	ref|Homo sapiens ubiquitin-like 7 (bone marrow stromal cell-derived) (UBL7), transcript variant 1, mRNA [NM_032907]
A_23_P117782	0.0426	up	1.32	LARP6	0.000842206	up	5.27	LARP6	0.00111	up	2.47	LARP6	0	ref|NM_018357|ens|ENST00000299213|gb|AK130092|gb|AF443828	GCAAGTAGCTAAGCCTATAGCATGGTGTCTTGTAGGACCAAATCGATGTTACCTGTCAAG	LARP6	NM_018357	ref|Homo sapiens La ribonucleoprotein domain family, member 6 (LARP6), transcript variant 1, mRNA [NM_018357]
A_23_P117852	na	na	na	na	0.0398219	down	-1.81	KIAA0101	na	na	na	na	8	ref|NM_014736|ref|NM_001029989|ens|ENST00000380258|ens|ENST00000300035	TACTGCTGCCATTTTTATTGGTGTTTGATTATTGGAATGGTGCCATATTGTCACTCCTTC	KIAA0101	NM_014736	ref|Homo sapiens KIAA0101 (KIAA0101), transcript variant 1, mRNA [NM_014736]
A_23_P117928	na	na	na	na	0.00471942	down	-1.5	BAHD1	na	na	na	na	8	ref|NM_014952|gb|AB023162|gb|AL833923|ens|ENST00000339351	AGGAGGTAGGGTCTTGGCTGCCCCGAACTTAAATGCTTTTGAAATCTCTTAGATGTGGAA	BAHD1	NM_014952	ref|Homo sapiens bromo adjacent homology domain containing 1 (BAHD1), mRNA [NM_014952]
A_23_P117933	na	na	na	na	na	na	na	na	0.048	up	1.17	GCSH	8	ref|NM_004483|ref|NR_033247|ref|NR_033249|gb|CR603013	GTCAGATGAGGAACACCACTATCTTAATTTTGCGATACACTGCATTTGCTGGTGCTATTT	GCSH	NM_004483	ref|Homo sapiens glycine cleavage system protein H (aminomethyl carrier) (GCSH), nuclear gene encoding mitochondrial protein, transcript variant 1, mRNA [NM_004483]
A_23_P11800	na	na	na	na	na	na	na	na	0.0167	up	1.9	CAMK2N1	8	ref|NM_018584|gb|CR604926|ens|ENST00000375078|gb|CR606015	AAGCTTGTGTTTCTTTGTTGCTGCAAGCTATCTGCCCAAGTTAATGCAAATGGACACATT	CAMK2N1	NM_018584	ref|Homo sapiens calcium/calmodulin-dependent protein kinase II inhibitor 1 (CAMK2N1), mRNA [NM_018584]
A_23_P118002	na	na	na	na	0.0223467	up	1.31	UQCRC2	na	na	na	na	8	ref|NM_003366|gb|CR626107|gb|CR626658|ens|ENST00000268379	TCATTTGTCTTTTTTCCAGTGAGGTAAAATAAGGCATAAATGCAGGTAATTATTCCCAGC	UQCRC2	NM_003366	ref|Homo sapiens ubiquinol-cytochrome c reductase core protein II (UQCRC2), nuclear gene encoding mitochondrial protein, mRNA [NM_003366]
A_23_P118105	na	na	na	na	0.0252928	up	1.98	NDUFB10	na	na	na	na	8	ref|NM_004548|gb|BC007509|ens|ENST00000268668|gb|AK311744	TCAGCAGAGGGAAGGACAGAACTACCAGCAGAACTGTATCAAGGAAGTGGAGCAGTTCAC	NDUFB10	NM_004548	ref|Homo sapiens NADH dehydrogenase (ubiquinone) 1 beta subcomplex, 10, 22kDa (NDUFB10), nuclear gene encoding mitochondrial protein, mRNA [NM_004548]
A_23_P118122	na	na	na	na	0.0286718	down	-1.92	RGS11	0.000794	up	4.31	RGS11	4	ref|NM_003834|ref|NM_183337|gb|AX747138|ens|ENST00000397768	GGGCTGGCTCACATCCAGTCACTCCCAACAGCGTCCAGCACACAAATAAAAGACCCTTGG	RGS11	NM_003834	ref|Homo sapiens regulator of G-protein signaling 11 (RGS11), transcript variant 2, mRNA [NM_003834]
A_23_P118150	0.0129	down	-1.91	ARL6IP1	na	na	na	na	0.0161	down	-1.84	ARL6IP1	4	ref|NM_015161|ens|ENST00000304414|gb|CR590895|gb|CR622050	TTCAGATTTTCAGCTGACATTAGCTATAGTATACAGTAGGTTAAGACTCATGTCTATGAC	ARL6IP1	NM_015161	ref|Homo sapiens ADP-ribosylation factor-like 6 interacting protein 1 (ARL6IP1), mRNA [NM_015161]
A_23_P118174	0.00756	down	-1.77	PLK1	na	na	na	na	na	na	na	na	8	ref|NM_005030|gb|AK310544|ens|ENST00000300093|ens|ENST00000425844	CGGCAGCGTGCAGATCAACTTCTTCCAGGATCACACCAAGCTCATCTTGTGCCCACTGAT	PLK1	NM_005030	ref|Homo sapiens polo-like kinase 1 (Drosophila) (PLK1), mRNA [NM_005030]
A_23_P118203	na	na	na	na	na	na	na	na	0.00279	up	3.1	ZG16B	8	ref|NM_145252|ens|ENST00000382280|gb|AY359021|gb|EF067313	CCACCAGTTAATCTCACATACTCAGCAAACTCACCCGTGGGTCGCTAGGGTGGGGTATGG	ZG16B	NM_145252	ref|Homo sapiens zymogen granule protein 16 homolog B (rat) (ZG16B), mRNA [NM_145252]
A_23_P118246	na	na	na	na	na	na	na	na	0.0212	down	-1.26	GINS2	8	ref|NM_016095|gb|AK091519|gb|AK001275|gb|CR595781	TGTGTGATGGTGCAAGGAATGGATTCAGGATGTTGTTGGAGAAACAAGTTTGTGATTAGT	GINS2	NM_016095	ref|Homo sapiens GINS complex subunit 2 (Psf2 homolog) (GINS2), mRNA [NM_016095]
A_23_P118254	0.0496	down	-1.21	FOXF1	0.0347299	down	-1.33	FOXF1	na	na	na	na	4	ref|NM_001451|ens|ENST00000262426|gb|BC089442|gb|U13219	GTAGGCTCCTCCGTTTATCAGTATTAATGGTGTAACTTTGTTGGCAATATTTGCCGTGTA	FOXF1	NM_001451	ref|Homo sapiens forkhead box F1 (FOXF1), mRNA [NM_001451]
A_23_P118406	na	na	na	na	na	na	na	na	0.0103	up	1.67	C17orf62	8	ref|NM_001033046|ref|NM_001100407|ref|NM_001100408|gb|CR611733	AAACTAACCAAACAGGAAAAACTGGGAGATTTTCTGCAGAAATTGAGTTCCAGCCTCTCT	C17orf62	NM_001033046	ref|Homo sapiens chromosome 17 open reading frame 62 (C17orf62), transcript variant 2, mRNA [NM_001033046]
A_23_P11841	na	na	na	na	0.020645	up	2.28	ATP2B4	0.0455	up	2.01	ATP2B4	4	ref|NM_001684|ref|NM_001001396|gb|BC150293|ens|ENST00000341360	CACGCACTATGATGAAGAACATCTTGGGCCATGCATTCTATCAGCTCATTGTCATCTTTA	ATP2B4	NM_001684	ref|Homo sapiens ATPase, Ca++ transporting, plasma membrane 4 (ATP2B4), transcript variant 2, mRNA [NM_001684]
A_23_P118427	0.00356	up	3.46	MAP2K3	na	na	na	na	na	na	na	na	8	ref|NM_145109|ref|NM_002756|gb|AK093838|ens|ENST00000395491	TATCCCGGCTTTGGTGCGGGGTACACAAGAGGGGATGAGTTGTGTGAATACCCCAAGACT	MAP2K3	NM_145109	ref|Homo sapiens mitogen-activated protein kinase kinase 3 (MAP2K3), transcript variant B, mRNA [NM_145109]
A_23_P11843	0.00213	down	-2.55	LRRN2	na	na	na	na	0.0281	up	1.32	LRRN2	4	ref|NM_201630|ref|NM_006338|ens|ENST00000367175|ens|ENST00000367177	CTTTGTGGAGAAATGTGTCACCTCCCCCAACCCGATTCACTCTTTTCTCCTGTTTTGTAA	LRRN2	NM_201630	ref|Homo sapiens leucine rich repeat neuronal 2 (LRRN2), transcript variant 2, mRNA [NM_201630]
A_23_P118435	0.0142	down	-1.43	SUMO2	na	na	na	na	na	na	na	na	8	ref|NM_006937|ref|NM_001005849|ref|NM_001002255|gb|CR614076	AGACGGGAGGTGTCTACTGAAAAGGGAACCTGCTTCTTTACTCCAGAACTCTGTTCTTTA	SUMO2	NM_006937	ref|Homo sapiens SMT3 suppressor of mif two 3 homolog 2 (S. cerevisiae) (SUMO2), transcript variant 1, mRNA [NM_006937]
A_23_P118493	na	na	na	na	0.0489365	up	1.37	TOM1L1	na	na	na	na	8	ref|NM_005486|gb|AK303912|gb|AK001893|ens|ENST00000348161	AATTACTTAGTCCTTAGGCCAACCAATTTAACTGCAGTGTCATGTTTCACAGGCCTTCCT	TOM1L1	NM_005486	ref|Homo sapiens target of myb1 (chicken)-like 1 (TOM1L1), mRNA [NM_005486]
A_23_P11859	na	na	na	na	0.011055	down	-4.86	HSD17B7	na	na	na	na	8	ref|NM_016371|gb|AK022929|ens|ENST00000254521|ens|ENST00000356314	ACGCTGTTGATGCCGGCAATATTGCTACTTCGCTTTTTTGCAAATGCATTCACTTTGACA	HSD17B7	NM_016371	ref|Homo sapiens hydroxysteroid (17-beta) dehydrogenase 7 (HSD17B7), mRNA [NM_016371]
A_23_P118607	na	na	na	na	0.0238789	up	1.51	AARSD1	na	na	na	na	8	ref|NM_025267|ref|NM_001136042|gb|CR619011|gb|CR613084	TGCTGAAGTGGATGGAGAGAAGTCATGGAACTGAAAAAGCACTGACTGCTCTGCTTAAGT	AARSD1	NM_025267	ref|Homo sapiens alanyl-tRNA synthetase domain containing 1 (AARSD1), transcript variant 2, mRNA [NM_025267]
A_23_P118690	0.0189	up	1.31	ZNF207	0.00419853	down	-1.66	ZNF207	0.00136	down	-1.44	ZNF207	0	ref|NM_001032293|ref|NM_001098507|ref|NM_003457|ens|ENST00000394673	AGCAGGAACTTTTCCTGAAGTTGCAATTTATACTGTATGGCTTCTTTTTCATGTTTCATC	ZNF207	NM_001032293	ref|Homo sapiens zinc finger protein 207 (ZNF207), transcript variant 2, mRNA [NM_001032293]
A_23_P118741	na	na	na	na	na	na	na	na	0.0354	up	1.74	SLC16A13	8	ref|NM_201566|ens|ENST00000308027|gb|BC131739|gb|BC109286	AACTAATAGGGACTAGAAGGATTTACTGTGGCCTGGGACTGTTGCAGATGATAGAGAGCA	SLC16A13	NM_201566	ref|Homo sapiens solute carrier family 16, member 13 (monocarboxylic acid transporter 13) (SLC16A13), mRNA [NM_201566]
A_23_P118815	0.0288	down	-1.16	BIRC5	na	na	na	na	0.0345	down	-1.32	BIRC5	4	ref|NM_001012271|ref|NM_001168|ref|NM_001012270|ens|ENST00000301633	CTGGAAACCTCTGGAGGTCATCTCGGCTGTTCCTGAGAAATAAAAAGCCTGTCATTTCAA	BIRC5	NM_001012271	ref|Homo sapiens baculoviral IAP repeat-containing 5 (BIRC5), transcript variant 3, mRNA [NM_001012271]
A_23_P118834	0.0184	down	-1.88	TOP2A	na	na	na	na	na	na	na	na	8	ref|NM_001067|ens|ENST00000446047|ens|ENST00000269577|ens|ENST00000357601	TGTGAGGCGATTATTTTAAGTAATTATCTTACCAAGCCCAAGACTGGTTTTAAAGTTACC	TOP2A	NM_001067	ref|Homo sapiens topoisomerase (DNA) II alpha 170kDa (TOP2A), mRNA [NM_001067]
A_23_P119040	na	na	na	na	na	na	na	na	0.0382	up	1.75	GREB1L	8	ref|NM_001142966|gb|AK293321|gb|AK023749|ens|ENST00000424526	AGGAATCCAAAGTTGAAGAGCCCAGGAAACGGGAAACTGTATCCATAATGCTGACCAAAT	GREB1L	NM_001142966	ref|Homo sapiens growth regulation by estrogen in breast cancer-like (GREB1L), mRNA [NM_001142966]
A_23_P119095	0.0166	up	1.66	PPP1R13L	na	na	na	na	na	na	na	na	8	ref|NM_006663|ref|NM_001142502|ens|ENST00000418234|ens|ENST00000360957	AGTCACTGCTGACACCATCTCTCCCAGCAGTCTTGGGGTCTGGGTGGGAAACATTGGTCT	PPP1R13L	NM_006663	ref|Homo sapiens protein phosphatase 1, regulatory (inhibitor) subunit 13 like (PPP1R13L), transcript variant 2, mRNA [NM_006663]
A_23_P119141	na	na	na	na	0.00148801	up	1.33	KEAP1	na	na	na	na	8	ref|NM_203500|ref|NM_012289|gb|BC014118|ens|ENST00000171111	TTTGTTTCTTGGGCAAAAATACAGTCCAATGGGGAGTATCATTGTTTTTGTACAAAAACC	KEAP1	NM_203500	ref|Homo sapiens kelch-like ECH-associated protein 1 (KEAP1), transcript variant 1, mRNA [NM_203500]
A_23_P119143	na	na	na	na	na	na	na	na	0.04	up	1.23	ICAM5	8	ref|NM_003259|gb|BC030132|ens|ENST00000221980|gb|U72671	GACGCCCCCCAGACTCACACGGGGGCTTATTTATTGCTTTATTTATTTACTTATTCATTT	ICAM5	NM_003259	ref|Homo sapiens intercellular adhesion molecule 5, telencephalin (ICAM5), mRNA [NM_003259]
A_23_P119254	na	na	na	na	0.0153727	down	-1.93	ASF1B	na	na	na	na	8	ref|NM_018154|ens|ENST00000263382|gb|CR604970|gb|CR609105	AGGAACCATGTTGCCTTTCCTGTCAATCACAGCCACCTTCCTGTTATCTCCTAAATGGAT	ASF1B	NM_018154	ref|Homo sapiens ASF1 anti-silencing function 1 homolog B (S. cerevisiae) (ASF1B), mRNA [NM_018154]
A_23_P119266	na	na	na	na	na	na	na	na	0.0106	up	1.96	DNASE2	8	ref|NM_001375|gb|AK297493|ens|ENST00000222219|gb|AK315358	CTGCCCTCTAACTGCTCGGATATCTGGCAGGTTCTGAATGTGAACCAGATAGCTTTCCCT	DNASE2	NM_001375	ref|Homo sapiens deoxyribonuclease II, lysosomal (DNASE2), mRNA [NM_001375]
A_23_P119295	na	na	na	na	0.0478637	down	-1.33	ECSIT	na	na	na	na	8	ref|NM_016581|ref|NM_001142464|ref|NM_001142465|ref|NR_024551	CTGAAGGCATGAGATGCCCTTTGAGTGTACAGCAAATCAATGTTTTCCTGCTTGGGGCTC	ECSIT	NM_016581	ref|Homo sapiens ECSIT homolog (Drosophila) (ECSIT), nuclear gene encoding mitochondrial protein, transcript variant 1, mRNA [NM_016581]
A_23_P119337	na	na	na	na	0.0103286	up	1.72	ATF5	0.00789	down	-1.92	ATF5	4	ref|NM_012068|ens|ENST00000306139|ens|ENST00000423777|gb|CR592798	ACAGAGAAGCAGCTGGGAGCTTGGAAACCTGGTCTCTTGAATTTCAAACCTGGTTTCTTA	ATF5	NM_012068	ref|Homo sapiens activating transcription factor 5 (ATF5), mRNA [NM_012068]
A_23_P119362	na	na	na	na	0.0466186	down	-1.65	EMP3	na	na	na	na	8	ref|NM_001425|ens|ENST00000270221|gb|CR541955|gb|BT007124	TGTTCATGTTCCAGCTCTACACCATGCGACGAGGAGGTCTCTTCTATGCCACCGGCCTCT	EMP3	NM_001425	ref|Homo sapiens epithelial membrane protein 3 (EMP3), mRNA [NM_001425]
A_23_P119478	0.043	up	1.24	EBI3	na	na	na	na	0.00546	up	4.47	EBI3	4	ref|NM_005755|ens|ENST00000221847|gb|CR602081|gb|CR608081	TCTAGCTGAGAAATGGAGATGTACTACTCTCTCCTTTACCTTTACCTTTACCACAGTGCA	EBI3	NM_005755	ref|Homo sapiens Epstein-Barr virus induced 3 (EBI3), mRNA [NM_005755]
A_23_P119562	na	na	na	na	0.040262	up	1.22	CFD	0.0107	up	1.54	CFD	4	ref|NM_001928|ens|ENST00000327726|gb|FV248234|gb|FV248328	GGCCTGAAGGTCAGGGTCACCCAAGCAACAAAGTCCCGAGCAATGAAGTCATCCACTCCT	CFD	NM_001928	ref|Homo sapiens complement factor D (adipsin) (CFD), mRNA [NM_001928]
A_23_P119778	0.0235	down	-1.99	SLC39A10	0.00184923	down	-4.29	SLC39A10	0.0104	down	-2.65	SLC39A10	0	ref|NM_020342|ref|NM_001127257|ens|ENST00000429142|ens|ENST00000409086	TAGATTATTGCCAGTGTCTTTTCTGTATGCTATAAGCAAGGGAGCTTAGGTGTTATTTCT	SLC39A10	NM_020342	ref|Homo sapiens solute carrier family 39 (zinc transporter), member 10 (SLC39A10), transcript variant 2, mRNA [NM_020342]
A_23_P119789	0.00271	up	1.36	TMEM185B	na	na	na	na	na	na	na	na	8	ref|NR_000034|gb|CR595954|gb|CR626230|gb|AK024632	ATGCTGAAGAAACATCAGTTCCAGAAGCTCCGAAAATTGCTCCAATATTTGGAAAGAAGG	TMEM185B	NR_000034	ref|Homo sapiens transmembrane protein 185B (pseudogene) (TMEM185B), non-coding RNA [NR_000034]
A_23_P11984	na	na	na	na	0.00967631	up	1.88	SLC6A9	na	na	na	na	8	ref|NM_201649|ref|NM_006934|ref|NM_001024845|gb|AK315933	GCCATCATGTACATCTACGGGCACCGGAACTACTTCCAGGACATCCAGATGATGCTGGGA	SLC6A9	NM_201649	ref|Homo sapiens solute carrier family 6 (neurotransmitter transporter, glycine), member 9 (SLC6A9), transcript variant 2, mRNA [NM_201649]
A_23_P119907	na	na	na	na	na	na	na	na	0.0094	up	1.37	ANKZF1	8	ref|NM_018089|ref|NM_001042410|gb|BC028334|ens|ENST00000410034	GACAAATCAACACGTAATGAGTTCCGAAGGTTCATGGAGAAGAATCCAGATGCCTACGAT	ANKZF1	NM_018089	ref|Homo sapiens ankyrin repeat and zinc finger domain containing 1 (ANKZF1), transcript variant 1, mRNA [NM_018089]
A_23_P119916	0.000582	down	-5.25	WNT6	0.0022768	down	-2.85	WNT6	na	na	na	na	4	ref|NM_006522|ens|ENST00000233948|gb|AB059570|gb|AY009401	TGGAAAAAAGCCAGTCTAAAGGCCTCTGGATACTGGGCTCCCCAGAACTGCTGGCCACAG	WNT6	NM_006522	ref|Homo sapiens wingless-type MMTV integration site family, member 6 (WNT6), mRNA [NM_006522]
A_23_P11995	na	na	na	na	0.00420473	down	-1.24	PRDX1	0.0156	up	1.28	PRDX1	4	ref|NM_002574|ref|NM_181696|ref|NM_181697|gb|CR593924	TCAGGATTATGGGGTCTTAAAGGCTGATGAAGGCATCTCGTTCAGGGGCCTTTTTATCAT	PRDX1	NM_002574	ref|Homo sapiens peroxiredoxin 1 (PRDX1), transcript variant 1, mRNA [NM_002574]
A_23_P119964	0.0145	up	1.38	CEBPZ	na	na	na	na	0.0125	down	-1.39	CEBPZ	4	ref|NM_005760|ens|ENST00000234170|gb|BC034475|gb|M37197	ATCTATTGGATGAAAATATGGGATCCAAGTTTGATAACATTGGCATGAATGCCATGGCTA	CEBPZ	NM_005760	ref|Homo sapiens CCAAT/enhancer binding protein (C/EBP), zeta (CEBPZ), mRNA [NM_005760]
A_23_P120194	0.0213	up	1.36	ORMDL1	na	na	na	na	na	na	na	na	8	ref|NM_016467|ref|NM_001128150|gb|CR936635|gb|CR602229	TGGGCAGGCCCAGCTTATAAGTTAAAGGGCATCACAGTGAGGGTGTAGTAGATAAATTCA	ORMDL1	NM_016467	ref|Homo sapiens ORM1-like 1 (S. cerevisiae) (ORMDL1), transcript variant 1, mRNA [NM_016467]
A_23_P120237	na	na	na	na	na	na	na	na	0.00641	down	-1.41	STARD7	8	ref|NM_020151|gb|AK023234|ens|ENST00000393595|ens|ENST00000337288	TAAACACTTCCTTGACCTTCTTGTTGCCTGTTCATTTTTGTGCCAAGGAAGTAGCTGCCC	STARD7	NM_020151	ref|Homo sapiens StAR-related lipid transfer (START) domain containing 7 (STARD7), mRNA [NM_020151]
A_23_P120254	na	na	na	na	na	na	na	na	0.0414	up	1.41	DUSP22	8	ref|NM_020185|ens|ENST00000344450|gb|AF424702|gb|CR596349	TTCTTTAGCAAGAGAAAATATTTTCCCCTTATCCCCACTGCTGTGGAGGTTTCTGTACCT	DUSP22	NM_020185	ref|Homo sapiens dual specificity phosphatase 22 (DUSP22), mRNA [NM_020185]
A_23_P120316	0.00609	up	2.32	MTHFD2	0.011236	up	2.6	MTHFD2	na	na	na	na	4	ref|NM_006636|ref|NR_027405|gb|CR602884|ens|ENST00000409601	AGGATTATTCCTTGCTATTAGTACTCATTTTATGTATGTTACCCTTCAGTAAGTTCTCCC	MTHFD2	NM_006636	ref|Homo sapiens methylenetetrahydrofolate dehydrogenase (NADP+ dependent) 2, methenyltetrahydrofolate cyclohydrolase (MTHFD2), nuclear gene encoding mitochondrial protein, transcript variant 1, mRNA [NM_006636]
A_23_P120364	na	na	na	na	0.046898	up	1.93	PPDPF	na	na	na	na	8	ref|NM_024299|ens|ENST00000370178|ens|ENST00000370179|gb|CR594162	CCAGCACTCGCTAGCTTTCCTGACACCTGGAACTGTGCACCTGGCACCAAGCGGAAAATA	PPDPF	NM_024299	ref|Homo sapiens pancreatic progenitor cell differentiation and proliferation factor homolog (zebrafish) (PPDPF), mRNA [NM_024299]
A_23_P120435	na	na	na	na	na	na	na	na	0.0136	up	2.01	WFDC3	8	ref|NM_080614|gb|BC102013|gb|BC102014|gb|BC026014	ACCAGTCCTGCCCCCAAAACTGACCATGAACCCCAACTGGACTGTGAGGTCTGATTCCGA	WFDC3	NM_080614	ref|Homo sapiens WAP four-disulfide core domain 3 (WFDC3), mRNA [NM_080614]
A_23_P120467	0.0479	down	-1.36	ZFP64	0.0141564	up	1.81	ZFP64	na	na	na	na	4	ref|NM_199427|ens|ENST00000361387|ens|ENST00000371523|gb|BC021087	GTCTGGGGTTGCTGGAAAACTTCTATTTCATAACCTGGGTGATCGTTCTAAGAGTGTTTG	ZFP64	NM_199427	ref|Homo sapiens zinc finger protein 64 homolog (mouse) (ZFP64), transcript variant 4, mRNA [NM_199427]
A_23_P12053	0.0391	up	1.3	SPEN	na	na	na	na	0.00478	down	-1.44	SPEN	4	ref|NM_015001|ens|ENST00000375759|gb|AF356524|gb|AL096858	CAGAGGAAATCTTATTTTCATATTCAGACTTTGTATTGCCCACTCATTTGTATAAGTGCG	SPEN	NM_015001	ref|Homo sapiens spen homolog, transcriptional regulator (Drosophila) (SPEN), mRNA [NM_015001]
A_23_P1206	na	na	na	na	na	na	na	na	0.016	up	1.3	RPS24	8	ref|NM_001026|ref|NM_033022|ref|NM_001142282|ref|NM_001142284	TTTGGATTCAGAACTCATTTTGGTGGTGGCAAGACAACTGGCTTTGGCATGATTTATGAT	RPS24	NM_001026	ref|Homo sapiens ribosomal protein S24 (RPS24), transcript variant c, mRNA [NM_001026]
A_23_P120710	na	na	na	na	0.0106443	down	-1.29	TTC3	0.0108	up	1.22	TTC3	4	ref|NM_003316|ref|NM_001001894|gb|D84294|gb|D84295	TCGTTCTGTGTTTGATATTTGTGTAAAGTATGCATGCAGTCTTGTACTGTGACCTAAGAA	TTC3	NM_003316	ref|Homo sapiens tetratricopeptide repeat domain 3 (TTC3), transcript variant 1, mRNA [NM_003316]
A_23_P120776	na	na	na	na	0.049456	down	-1.97	SLC25A1	0.0304	up	2.16	SLC25A1	4	ref|NM_005984|gb|AK298204|gb|CR622978|ens|ENST00000451283	CAGGCACCGCCAGAGTGTCCTGCTACCTTTGTCTCACATGATTCCAGTGCAGTAGTGCCA	SLC25A1	NM_005984	ref|Homo sapiens solute carrier family 25 (mitochondrial carrier; citrate transporter), member 1 (SLC25A1), nuclear gene encoding mitochondrial protein, mRNA [NM_005984]
A_23_P120812	na	na	na	na	na	na	na	na	0.00791	up	3.12	IGLL1	8	ref|NM_020070|ref|NR_029395|gb|BC050388|ens|ENST00000438703	GGGGGTTTCAATCCAAGCATAACTCAGTGACGCATGTGTTTGGCAGCGGGACCCAGCTCA	IGLL1	NM_020070	ref|Homo sapiens immunoglobulin lambda-like polypeptide 1 (IGLL1), transcript variant 1, mRNA [NM_020070]
A_23_P120845	0.00159	up	2.44	XBP1	0.0166231	up	1.56	XBP1	0.00311	up	1.6	XBP1	0	ref|NM_005080|ref|NM_001079539|gb|CR615221|gb|CR606064	CCTTTTTGGCATCCTGGCTTGCCTCCAGTTTTAGGTCCTTTAGTTTGCTTCTGTAAGCAA	XBP1	NM_005080	ref|Homo sapiens X-box binding protein 1 (XBP1), transcript variant 1, mRNA [NM_005080]
A_23_P120860	0.00616	down	-1.34	NIPSNAP1	0.0018352	down	-1.86	NIPSNAP1	0.00925	up	1.47	NIPSNAP1	0	ref|NM_003634|ens|ENST00000216121|gb|CR592474|gb|CR598746	GGAAGGTAGAACTTAGAATTCAGAACTTGGGTTTCAATTGTAGAATTTGGAATCTGGAAT	NIPSNAP1	NM_003634	ref|Homo sapiens nipsnap homolog 1 (C. elegans) (NIPSNAP1), mRNA [NM_003634]
A_23_P120883	0.000258	down	-2.74	HMOX1	na	na	na	na	0.0149	up	1.92	HMOX1	4	ref|NM_002133|ens|ENST00000216117|gb|CR600636|gb|CR592402	TGGGGAGGGAGGTGTTTAACGGCACTGTGGCCTTGGTCTAACTTTTGTGTGAAATAATAA	HMOX1	NM_002133	ref|Homo sapiens heme oxygenase (decycling) 1 (HMOX1), mRNA [NM_002133]
A_23_P120931	0.0494	down	-1.5	APOBEC3C	0.00896702	down	-1.46	APOBEC3C	0.0136	up	1.9	APOBEC3C	0	ref|NM_014508|ens|ENST00000396752|ens|ENST00000396762|ens|ENST00000361441	TTGGGAAAACTTTGTGTACAATGATAATGAGCCATTCAAGCCTTGGAAGGGATTAAAAAC	APOBEC3C	NM_014508	ref|Homo sapiens apolipoprotein B mRNA editing enzyme, catalytic polypeptide-like 3C (APOBEC3C), mRNA [NM_014508]
A_23_P120933	0.000619	up	1.49	ATF4	na	na	na	na	0.0237	up	1.22	ATF4	4	ref|NM_001675|ref|NM_182810|gb|AK296028|ens|ENST00000337304	CAAGGCAAGGGGGAAGAAAAGGGTCCCCTAGTTGAGGATAGTCAGGAGCGTCAATGTGCT	ATF4	NM_001675	ref|Homo sapiens activating transcription factor 4 (tax-responsive enhancer element B67) (ATF4), transcript variant 1, mRNA [NM_001675]
A_23_P121011	0.00442	up	2.91	CSRNP1	na	na	na	na	0.0414	up	1.8	CSRNP1	4	ref|NM_033027|gb|AB063301|ens|ENST00000444454|ens|ENST00000273153	GCGTGATGTTCCTTAGCCCAAAGACGGTGAGACAGGGCTGAAATCAGGTGGCTTCTGCCA	CSRNP1	NM_033027	ref|Homo sapiens cysteine-serine-rich nuclear protein 1 (CSRNP1), mRNA [NM_033027]
A_23_P121120	0.0121	up	23.41	GPR87	na	na	na	na	na	na	na	na	8	ref|NM_023915|ens|ENST00000260843|gb|AF411114|gb|EU883576	GTACATCCACAAATCCAGCAGGCAATTCATAAGTCAGTCAAGCCGAAAGCGAAAACATAA	GPR87	NM_023915	ref|Homo sapiens G protein-coupled receptor 87 (GPR87), mRNA [NM_023915]
A_23_P121141	0.0426	up	1.34	ASTE1	na	na	na	na	na	na	na	na	8	ref|NM_014065|gb|AK294156|gb|BC069265|ens|ENST00000264992	TTGATGCAGTAGAACTGGCCAAGGATCATTCTGACTTAAGCAGATTGACTGAGCTCTCCT	ASTE1	NM_014065	ref|Homo sapiens asteroid homolog 1 (Drosophila) (ASTE1), mRNA [NM_014065]
A_23_P121215	na	na	na	na	na	na	na	na	0.0429	up	2.23	CAMK1	8	ref|NM_003656|gb|CR621015|ens|ENST00000397277|ens|ENST00000256460	TGAACAGATTTTGAAGGCCGAGTACGAGTTTGACTCTCCTTACTGGGACGACATCTCTGA	CAMK1	NM_003656	ref|Homo sapiens calcium/calmodulin-dependent protein kinase I (CAMK1), mRNA [NM_003656]
A_23_P121222	0.0137	up	2.03	RAD18	0.0246979	up	2.16	RAD18	na	na	na	na	4	ref|NM_020165|ens|ENST00000264926|gb|AF169796|thc|THC2462576	GAGCATGTCAAACAAAATAGGAGCTCACATGGATATATTTATGTCACTGAGTTGTCAGAA	RAD18	NM_020165	ref|Homo sapiens RAD18 homolog (S. cerevisiae) (RAD18), mRNA [NM_020165]
A_23_P121265	na	na	na	na	0.0379108	down	-1.76	TWF2	0.0187	up	1.63	TWF2	4	ref|NM_007284|gb|CR613911|ens|ENST00000305533|gb|CR456732	GGTCAACTACATCCAGATGAAGCTGGACCTAGAGCGGGAAACCATTGAGCTGGTGCACAC	TWF2	NM_007284	ref|Homo sapiens twinfilin, actin-binding protein, homolog 2 (Drosophila) (TWF2), mRNA [NM_007284]
A_23_P121276	na	na	na	na	0.0120937	up	3.51	NEK4	na	na	na	na	8	ref|NM_003157|gb|BC063044|gb|AK294165|ens|ENST00000461689	GCCAGGTTCTGAAAAGATCAGGAGACTAGTTGAAGTCTTGAGAACTGATGTAATTCGTGG	NEK4	NM_003157	ref|Homo sapiens NIMA (never in mitosis gene a)-related kinase 4 (NEK4), mRNA [NM_003157]
A_23_P12128	na	na	na	na	na	na	na	na	0.0475	down	-2.04	TSHB	8	ref|NM_000549|ens|ENST00000369517|ens|ENST00000256592|gb|BC069298	TACCAGGATGCCCACTCCATGTTGCTCCCTATTTTTCCTATCCTGTTGCTTTAAGCTGTA	TSHB	NM_000549	ref|Homo sapiens thyroid stimulating hormone, beta (TSHB), mRNA [NM_000549]
A_23_P121326	na	na	na	na	0.00100368	down	-1.73	CYB561D2	na	na	na	na	8	ref|NM_007022|gb|CR598666|gb|AF040704|ens|ENST00000418577	CTGTTGAACTCTCTCAGCTGAGTCAGGGGACACCTCAGGCACTGGGACAGTTGGGCATTT	CYB561D2	NM_007022	ref|Homo sapiens cytochrome b-561 domain containing 2 (CYB561D2), mRNA [NM_007022]
A_23_P121356	na	na	na	na	0.0040133	up	1.52	BBX	na	na	na	na	8	ref|NM_020235|ref|NM_001142568|gb|AF454942|gb|AF168718	AGAATGATCCTGGAGCTTTGCTTTCTATTGAAGGCTTTTGACGGTAATAGGTGGTAACTT	BBX	NM_020235	ref|Homo sapiens bobby sox homolog (Drosophila) (BBX), transcript variant 2, mRNA [NM_020235]
A_23_P121447	0.0404	down	-1.47	ARPM1	0.0227029	down	-1.78	ARPM1	na	na	na	na	4	ref|NM_032487|ens|ENST00000330368|gb|DQ896441|gb|EU176440	CTCCAGAAAGGAAAATATCAGTGTGGATGGGAGGTTCTATTCTTGCATCCTTGTCTGCCT	ARPM1	NM_032487	ref|Homo sapiens actin related protein M1 (ARPM1), mRNA [NM_032487]
A_23_P12147	0.0242	up	1.91	C1orf74	0.0380631	up	1.94	C1orf74	0.0161	up	1.51	C1orf74	0	ref|NM_152485|ens|ENST00000294811|gb|CR598637|gb|CR599983	CTCAGAACCCGATTTAGGACTCAGAATGACTTTGCTGATCTCAGCATCTCCTCTGAGATA	C1orf74	NM_152485	ref|Homo sapiens chromosome 1 open reading frame 74 (C1orf74), mRNA [NM_152485]
A_23_P121499	na	na	na	na	0.0326948	up	1.48	WFS1	na	na	na	na	8	ref|NM_006005|ref|NM_001145853|gb|BC069213|ens|ENST00000226760	CTGACCTTTCTGAGTGACATGGGTGTGCCAGGCTAGACTAGGAGGTTCCGGTGTCTGGAA	WFS1	NM_006005	ref|Homo sapiens Wolfram syndrome 1 (wolframin) (WFS1), transcript variant 1, mRNA [NM_006005]
A_23_P121527	na	na	na	na	0.0117347	up	1.66	KLHL5	na	na	na	na	8	ref|NM_015990|ref|NM_001007075|ref|NM_199039|ref|NM_001171654	CTTTTGATATTGACAAAATTGTTTGGATATCCTTATGTTCTCAAGTCTGTATCTGCCTCC	KLHL5	NM_015990	ref|Homo sapiens kelch-like 5 (Drosophila) (KLHL5), transcript variant 1, mRNA [NM_015990]
A_23_P121533	na	na	na	na	na	na	na	na	0.00803	up	14.55	SPON2	8	ref|NM_012445|ref|NM_001128325|gb|AK024499|ens|ENST00000431380	GCGGTTTCGGAAGCGTCAGTGTTTCCATGTTATGGATCTCTCTGCGTTTGAATAAAGACT	SPON2	NM_012445	ref|Homo sapiens spondin 2, extracellular matrix protein (SPON2), transcript variant 1, mRNA [NM_012445]
A_23_P121602	0.0153	down	-1.45	SAP30	0.00481846	down	-2.22	SAP30	0.0209	down	-1.55	SAP30	0	ref|NM_003864|ens|ENST00000296504|gb|AF055993|gb|BC016757	GGAGACGTGGAATTGAGACTAATAACTTGGATGTTAACACTGTTTACTGTTTTTTCACAT	SAP30	NM_003864	ref|Homo sapiens Sin3A-associated protein, 30kDa (SAP30), mRNA [NM_003864]
A_23_P121665	na	na	na	na	na	na	na	na	0.0445	up	1.89	SORCS2	8	ref|NM_020777|ens|ENST00000329016|ens|ENST00000360303|gb|FU982568	ATGTTAATATTTCTATTAAGAACATGTTGGGCATGTGGACCCAAGCACCTGGGAAGGAGG	SORCS2	NM_020777	ref|Homo sapiens sortilin-related VPS10 domain containing receptor 2 (SORCS2), mRNA [NM_020777]
A_23_P121686	na	na	na	na	0.0221723	up	1.36	AIMP1	na	na	na	na	8	ref|NM_004757|ref|NM_001142416|ref|NM_001142415|ens|ENST00000358008	GGTCATGTGTGCTAGTTCACCAGAGAAAATTGAAATCTTGGCTCCTCCAAATGGGTCTGT	AIMP1	NM_004757	ref|Homo sapiens aminoacyl tRNA synthetase complex-interacting multifunctional protein 1 (AIMP1), transcript variant 1, mRNA [NM_004757]
A_23_P121702	na	na	na	na	na	na	na	na	0.0291	up	1.4	OCIAD2	8	ref|NM_001014446|ref|NM_152398|ens|ENST00000381464|ens|ENST00000273860	AGACTCTCAGCCTTCAGCTTCCTAAATTCTGTGTCTGTGACTTTCGAAGTTTTTTAAACC	OCIAD2	NM_001014446	ref|Homo sapiens OCIA domain containing 2 (OCIAD2), transcript variant 1, mRNA [NM_001014446]
A_23_P121716	0.00157	up	1.87	ANXA3	na	na	na	na	0.00468	down	-2.79	ANXA3	4	ref|NM_005139|gb|CR590148|gb|CR600226|ens|ENST00000380662	TGGACATTCGAACAGAGTTCAAGAAGCATTATGGCTATTCCCTATATTCAGCAATTAAAT	ANXA3	NM_005139	ref|Homo sapiens annexin A3 (ANXA3), mRNA [NM_005139]
A_23_P12173	na	na	na	na	na	na	na	na	0.0113	up	1.48	CRTC2	8	ref|NM_181715|gb|AK096382|gb|BC033304|ens|ENST00000303569	CTCACCACTCTTCCCCTTGCAGTGGAGGAGAGAGCCAGAGTGGATACTATTTTTTATTAA	CRTC2	NM_181715	ref|Homo sapiens CREB regulated transcription coactivator 2 (CRTC2), mRNA [NM_181715]
A_23_P121875	0.00376	up	1.63	C5orf28	0.000970405	up	2.9	C5orf28	na	na	na	na	4	ref|NM_022483|gb|BC013351|ens|ENST00000397080|gb|AK025310	TTAAAACATGTTGGCTACAGTAGCACTTTACTGAAGTAGTATTTTTTGGTATCTCTAGCC	C5orf28	NM_022483	ref|Homo sapiens chromosome 5 open reading frame 28 (C5orf28), mRNA [NM_022483]
A_23_P12189	na	na	na	na	0.047597	up	1.51	DFFA	na	na	na	na	8	ref|NM_213566|ref|NM_004401|gb|BC007112|gb|AK222546	GATATAGCTGCACCAACAATATCCCGCCTCCTCTAATTACATATGATGTTCTCTGTTCAA	DFFA	NM_213566	ref|Homo sapiens DNA fragmentation factor, 45kDa, alpha polypeptide (DFFA), transcript variant 2, mRNA [NM_213566]
A_23_P121956	na	na	na	na	0.0330177	up	2	THG1L	na	na	na	na	8	ref|NM_017872|gb|AK304590|ens|ENST00000448153|gb|AB528251	TTGCACTGCGATATCATCGGGGATGCTTTCTGGAAGGAACATCCAGAGATTCTAGATGAA	THG1L	NM_017872	ref|Homo sapiens tRNA-histidine guanylyltransferase 1-like (S. cerevisiae) (THG1L), mRNA [NM_017872]
A_23_P12199	na	na	na	na	na	na	na	na	0.016	down	-2.99	FAM46B	8	ref|NM_052943|ens|ENST00000445292|ens|ENST00000289166|gb|BC012790	TTTCCTTCAGGAGACAAAGCAAGTTTGGGGTGGTAGCCTTAATGCCCAGCACCTTGGATT	FAM46B	NM_052943	ref|Homo sapiens family with sequence similarity 46, member B (FAM46B), mRNA [NM_052943]
A_23_P122041	na	na	na	na	na	na	na	na	0.00162	down	-1.64	PPP2CA	8	ref|NM_002715|gb|CR624778|gb|CR601999|gb|CR594899	CATTAACACCTCGTGAATACAATTTAACTTCCATTTAGCTATAGCTTTACTCAGCATGAC	PPP2CA	NM_002715	ref|Homo sapiens protein phosphatase 2, catalytic subunit, alpha isozyme (PPP2CA), mRNA [NM_002715]
A_23_P122052	na	na	na	na	0.017264	up	1.34	GPX8	na	na	na	na	8	ref|NM_001008397|gb|CR620005|gb|AK307365|gb|BX537894	TTAAGTGGTAATGAATGTTCCCAGGATGAGGATGTTACCCAAAGCAAAAATCAAGAGTAG	GPX8	NM_001008397	ref|Homo sapiens glutathione peroxidase 8 (putative) (GPX8), mRNA [NM_001008397]
A_23_P122197	0.00657	down	-1.34	CCNB1	0.00546889	down	-1.34	CCNB1	0.0259	down	-1.68	CCNB1	0	ref|NM_031966|gb|CR612103|ens|ENST00000256442|gb|CR590390	GGACACCAACTCTACAACATTACCTGTCATATACTGAAGAATCTCTTCTTCCAGTTATGC	CCNB1	NM_031966	ref|Homo sapiens cyclin B1 (CCNB1), mRNA [NM_031966]
A_23_P122216	na	na	na	na	na	na	na	na	0.0438	up	1.48	LOX	8	ref|NM_002317|gb|AK316309|gb|AK307732|gb|AK307559	TACCTGGTTCCTGAATCTGACTATACCAACAATGTTGTGCGCTGTGACATTCGCTACACA	LOX	NM_002317	ref|Homo sapiens lysyl oxidase (LOX), mRNA [NM_002317]
A_23_P122233	0.00971	down	-1.19	MRPL22	0.0095172	down	-1.29	MRPL22	na	na	na	na	4	ref|NM_001014990|ref|NM_014180|ens|ENST00000342738|ens|ENST00000439747	TCGCTTTGGGATCATGGAGAAGGTTTATTGCCATTATTTTGTGAAGTTGGTGGAAGGGCC	MRPL22	NM_001014990	ref|Homo sapiens mitochondrial ribosomal protein L22 (MRPL22), nuclear gene encoding mitochondrial protein, transcript variant 2, mRNA [NM_001014990]
A_23_P122443	na	na	na	na	na	na	na	na	0.00199	up	2.18	HIST1H1C	8	ref|NM_005319|ens|ENST00000343677|gb|AB451385|gb|AB451259	AGAAAGCTGCCAAAAGTGCTGCTAAGGCTGTGAAGCCCAAGGCCGCTAAGCCCAAGGTTG	HIST1H1C	NM_005319	ref|Homo sapiens histone cluster 1, H1c (HIST1H1C), mRNA [NM_005319]
A_23_P122464	na	na	na	na	0.0362311	up	1.98	ZNF193	na	na	na	na	8	ref|NM_006299|gb|CR619676|gb|AK226035|ens|ENST00000418166	TCACCAGTGCATTGAATGTGGGAAAAGCTTTAATCGACACTGCAACCTCATTCGCCATCA	ZNF193	NM_006299	ref|Homo sapiens zinc finger protein 193 (ZNF193), mRNA [NM_006299]
A_23_P122531	0.00221	up	1.64	C6orf48	0.0024488	up	2.53	C6orf48	0.0155	up	1.56	C6orf48	0	ref|NM_001040437|ref|NM_001040438|gb|AJ249732|ens|ENST00000375640	ATTTGCTGACACAATATCTTCCGCCTGGTGCTGGGCATATCCTAAGAACTTACAACTTTC	C6orf48	NM_001040437	ref|Homo sapiens chromosome 6 open reading frame 48 (C6orf48), transcript variant 1, mRNA [NM_001040437]
A_23_P122532	na	na	na	na	0.0266834	up	1.17	C6orf47	na	na	na	na	8	ref|NM_021184|ens|ENST00000366432|ens|ENST00000375911|ens|ENST00000413113	GAGGGCACTGCTCTTGGATTCACCAGCTGTTATTTTTGCTTTTACTTTTCTCCCACCTTC	C6orf47	NM_021184	ref|Homo sapiens chromosome 6 open reading frame 47 (C6orf47), mRNA [NM_021184]
A_23_P122624	0.00159	up	1.45	LTV1	na	na	na	na	0.00327	down	-1.58	LTV1	4	ref|NM_032860|ens|ENST00000367576|gb|CR593625|gb|AK027815	TGAACTTGAAGAAGAATGTTGAGGGTCTAAAGCTATAGACAGTGGAGCATACAGGGCAAG	LTV1	NM_032860	ref|Homo sapiens LTV1 homolog (S. cerevisiae) (LTV1), mRNA [NM_032860]
A_23_P122662	na	na	na	na	0.0058175	up	1.92	GFOD1	0.0209	up	1.34	GFOD1	4	ref|NM_018988|gb|AK027010|gb|AK000337|thc|THC2473326	CATCCAGCTTTGTGGATTTAGAAAGGAAGCCTTCAGTTCCAATCAGAATCCTCTTTCCTT	GFOD1	NM_018988	ref|Homo sapiens glucose-fructose oxidoreductase domain containing 1 (GFOD1), mRNA [NM_018988]
A_23_P122674	na	na	na	na	0.0353281	up	1.41	PAK1IP1	0.00567	down	-1.85	PAK1IP1	4	ref|NM_017906|ens|ENST00000379568|gb|AB527917|gb|DQ892798	ACAGTGCACAAAGAAGAAAAGCGGTCAAAACCTAACACAAAGAAACGCGGTTTAACAGGT	PAK1IP1	NM_017906	ref|Homo sapiens PAK1 interacting protein 1 (PAK1IP1), mRNA [NM_017906]
A_23_P122724	0.0118	up	1.82	VNN2	0.00219419	down	-1.59	VNN2	0.00311	down	-2.77	VNN2	0	ref|NM_004665|ref|NM_078488|gb|BC064641|ens|ENST00000335846	AAAGAGCCTGGGTGTTTGGGTCAGATAAATGAAGATCAAACTCCAGCTCCAGCCTCATTT	VNN2	NM_004665	ref|Homo sapiens vanin 2 (VNN2), transcript variant 1, mRNA [NM_004665]
A_23_P122805	na	na	na	na	0.0311055	up	2	TMEM209	na	na	na	na	8	ref|NM_032842|ens|ENST00000397622|ens|ENST00000336804|gb|AK027709	ACCGTGTATCAGTGTTAGATGTGCATCCCGTTTTGTCATTCCCTCAGACTTTGAATACAG	TMEM209	NM_032842	ref|Homo sapiens transmembrane protein 209 (TMEM209), mRNA [NM_032842]
A_23_P122815	na	na	na	na	na	na	na	na	0.0302	up	1.76	CALU	8	ref|NM_001219|ref|NM_001130674|ens|ENST00000449187|ens|ENST00000342367	TTATGAGTTTGGTTGCAGTGTTCTTATCTTGTGGGCTGATTTCCAAAAACCACATGCTGC	CALU	NM_001219	ref|Homo sapiens calumenin (CALU), transcript variant 1, mRNA [NM_001219]
A_23_P122852	na	na	na	na	0.00238383	up	2.26	SMARCD3	0.0129	up	2.68	SMARCD3	4	ref|NM_003078|ref|NM_001003801|ref|NM_001003802|ens|ENST00000356800	GGGCTCCAGCATCACTCCTCTGCCACCTTGGGGTGTGGGGCTGGATTAAAAGTCATTCAT	SMARCD3	NM_003078	ref|Homo sapiens SWI/SNF related, matrix associated, actin dependent regulator of chromatin, subfamily d, member 3 (SMARCD3), transcript variant 2, mRNA [NM_003078]
A_23_P122863	0.00276	up	1.48	GRB10	0.000625342	up	3.67	GRB10	0.00849	up	1.63	GRB10	0	ref|NM_001001555|ref|NM_001001550|ref|NM_005311|ref|NM_001001549	GAAAATAAACTGGAATGATCATCTATGGCTTGGGCCGCTTAGGAACAAGAACCGGAGAGA	GRB10	NM_001001555	ref|Homo sapiens growth factor receptor-bound protein 10 (GRB10), transcript variant 4, mRNA [NM_001001555]
A_23_P122876	na	na	na	na	0.00297612	up	1.46	TAF6	0.0352	down	-1.19	TAF6	4	ref|NM_005641|ref|NM_139123|ref|NM_139122|ref|NM_139315	TTGCTTCCTTCATGTCACTTTCTTTTTAGATATTGTACAGCCAGTTTCTCAGAATAAAAG	TAF6	NM_005641	ref|Homo sapiens TAF6 RNA polymerase II, TATA box binding protein (TBP)-associated factor, 80kDa (TAF6), transcript variant 1, mRNA [NM_005641]
A_23_P122915	na	na	na	na	na	na	na	na	0.00505	up	1.61	BRI3	8	ref|NM_015379|ens|ENST00000297290|gb|BC018737|gb|AF041430	GAGAGGCAGTGCTGCTGCTCCCGCCCGAGGCTCATGACAACTCAATAAAGCACTGCTTTT	BRI3	NM_015379	ref|Homo sapiens brain protein I3 (BRI3), transcript variant 1, mRNA [NM_015379]
A_23_P122924	0.000633	up	9.11	INHBA	na	na	na	na	na	na	na	na	8	ref|NM_002192|gb|M13436|ens|ENST00000442711|gb|AK290584	AAACATCATCAAAAAGGACATTCAGAACATGATCGTGGAGGAGTGTGGGTGCTCATAGAG	INHBA	NM_002192	ref|Homo sapiens inhibin, beta A (INHBA), mRNA [NM_002192]
A_23_P123086	na	na	na	na	0.017067	up	1.73	KIAA1908	na	na	na	na	8	ref|NR_027329|ref|NR_027328|ref|NR_021487|gb|AB067495	GGCAGTCTGGTCTAGAGGGTCCATGATGGCTTTACTCACATGCCTGGCATCTTGACAGGG	KIAA1908	NR_027329	ref|Homo sapiens hypothetical LOC114796 (KIAA1908), transcript variant 1, non-coding RNA [NR_027329]
A_23_P123193	0.0407	up	1.43	ACTR3B	na	na	na	na	na	na	na	na	8	ref|NM_020445|ref|NM_001040135|ens|ENST00000256001|gb|CR592677	ATAGAAGATGATGGTTTGTTGTCGGTGAGTGTTGGATGAAATACTTCCTTGCACCATTGT	ACTR3B	NM_020445	ref|Homo sapiens ARP3 actin-related protein 3 homolog B (yeast) (ACTR3B), transcript variant 1, mRNA [NM_020445]
A_23_P12329	na	na	na	na	na	na	na	na	0.0139	up	2.05	APH1A	8	ref|NM_016022|ref|NM_001077628|gb|AK300640|gb|AK297680	TTTTCTCAGGCCTGAGGGGGAACCATTTTTGGTGTGATAAATACCCTAAACTGCCTTTTT	APH1A	NM_016022	ref|Homo sapiens anterior pharynx defective 1 homolog A (C. elegans) (APH1A), transcript variant 2, mRNA [NM_016022]
A_23_P123330	na	na	na	na	0.0231472	up	1.26	RPL30	na	na	na	na	8	ref|NM_000989|ens|ENST00000287038|ens|ENST00000396072|ens|ENST00000396070	TCTGAAATAGAGTACTATGCTATGTTGGCTAAAACTGGTGTCCATCACTACAGTGGCAAT	RPL30	NM_000989	ref|Homo sapiens ribosomal protein L30 (RPL30), mRNA [NM_000989]
A_23_P12336	na	na	na	na	0.010621	up	1.72	PRMT6	na	na	na	na	8	ref|NM_018137|ens|ENST00000361318|ens|ENST00000370078|gb|BC002729	CTCTCTCATTTGGAGGGATCATGTGAGTTGGCCTACTTACAAGTAGTGAAAGTTCCCTTT	PRMT6	NM_018137	ref|Homo sapiens protein arginine methyltransferase 6 (PRMT6), mRNA [NM_018137]
A_23_P123424	na	na	na	na	0.0346695	down	-1.47	CHRNB3	na	na	na	na	8	ref|NM_000749|ens|ENST00000289957|gb|BC069681|gb|BC069703	ACCGAATCTTCCTGTGGCTCTTTCTGATAGTGTCAGTAACAGGCTCGGTTCTGATTTTTA	CHRNB3	NM_000749	ref|Homo sapiens cholinergic receptor, nicotinic, beta 3 (CHRNB3), mRNA [NM_000749]
A_23_P12343	na	na	na	na	0.0280712	down	-1.17	GSTM3	0.0284	up	1.2	GSTM3	4	ref|NM_000849|ref|NR_024537|ens|ENST00000361066|ens|ENST00000256594	AGCTTGTTTTGTTTCATCCTGTCCGTAAGGGGTCAGCGCTCTTGCTTTGCTCTTTTCAAT	GSTM3	NM_000849	ref|Homo sapiens glutathione S-transferase mu 3 (brain) (GSTM3), transcript variant 1, mRNA [NM_000849]
A_23_P123454	na	na	na	na	na	na	na	na	0.012	up	1.59	NUDT18	8	ref|NM_024815|gb|CR622192|ens|ENST00000420897|ens|ENST00000309188	GAGATGCTTTGAGGAGCATTCCTCTAGATTGCACAAGGGACAGTGCCTTTAACCAAGCGA	NUDT18	NM_024815	ref|Homo sapiens nudix (nucleoside diphosphate linked moiety X)-type motif 18 (NUDT18), mRNA [NM_024815]
A_23_P123539	0.037	up	1.36	PPP2R2A	0.00424623	up	1.53	PPP2R2A	na	na	na	na	4	ref|NM_002717|gb|AK130123|gb|AK303981|ens|ENST00000380737	ATTCATCACTGTGGTGTTCTCCATGTCTGCTAGCCATTTAGGTAAGGGTAGGGCACTTTT	PPP2R2A	NM_002717	ref|Homo sapiens protein phosphatase 2 (formerly 2A), regulatory subunit B, alpha isoform (PPP2R2A), mRNA [NM_002717]
A_23_P12363	0.0245	up	2.87	ROR1	0.0211482	down	-1.44	ROR1	na	na	na	na	4	ref|NM_005012|gb|BC128386|gb|M97675|gb|AK309189	ATGCACAACTTTTGTAAATGTGGTATACAGGACAAACTAGACGGCCGTAGAAAAGATTTA	ROR1	NM_005012	ref|Homo sapiens receptor tyrosine kinase-like orphan receptor 1 (ROR1), transcript variant 1, mRNA [NM_005012]
A_23_P123732	na	na	na	na	0.0039275	up	2.87	C9orf103	na	na	na	na	8	ref|NM_001001551|gb|AY615889|ens|ENST00000454393|ens|ENST00000405990	TCAATGCTGGAAATCGTTACATTGTTTAGAACATTCTTGCTCATGCCTGTATTTGCACAA	C9orf103	NM_001001551	ref|Homo sapiens chromosome 9 open reading frame 103 (C9orf103), mRNA [NM_001001551]
A_23_P123916	na	na	na	na	na	na	na	na	0.0232	up	1.99	LRSAM1	8	ref|NM_138361|ref|NM_001005373|ref|NM_001005374|gb|AK056203	AGGTGCAGGCCTCAGAGTGTGTCGTGTGCCTGGAACGGGAGGCCCAGATGATCTTCCTCA	LRSAM1	NM_138361	ref|Homo sapiens leucine rich repeat and sterile alpha motif containing 1 (LRSAM1), transcript variant 1, mRNA [NM_138361]
A_23_P124024	0.00606	up	1.92	MED10	na	na	na	na	0.0173	down	-1.69	MED10	4	ref|NM_032286|ens|ENST00000255764|gb|AY453397|gb|AY598325	TCGACACCATGAAGAAATTTAAAAGCCTGTTGATTCAAGAACTTTCTAAAGTATTTCCGG	MED10	NM_032286	ref|Homo sapiens mediator complex subunit 10 (MED10), mRNA [NM_032286]
A_23_P124044	na	na	na	na	0.008312	up	2.24	DEAF1	na	na	na	na	8	ref|NM_021008|gb|AB209831|ens|ENST00000382409|ens|ENST00000338675	GGAAGGTAAAGAAACTTGCTGGACAAGTCATTAACACACTTTAAGCGAATGGTGCCCTGG	DEAF1	NM_021008	ref|Homo sapiens deformed epidermal autoregulatory factor 1 (Drosophila) (DEAF1), mRNA [NM_021008]
A_23_P124122	na	na	na	na	0.0082802	up	1.76	PXMP2	na	na	na	na	8	ref|NM_018663|ens|ENST00000317479|gb|BC073997|gb|AY044439	AGAAACAGAAATCTCTGAATGTCAGAAACCCTGTCTTTTAAAAAGGCAGTCACTGCCTTC	PXMP2	NM_018663	ref|Homo sapiens peroxisomal membrane protein 2, 22kDa (PXMP2), mRNA [NM_018663]
A_23_P124252	na	na	na	na	0.00561813	up	1.64	CAMK1D	na	na	na	na	8	ref|NM_020397|ens|ENST00000378845|gb|AK289393|gb|AF286366	TCCTGTTTGCCAGGCGCTTTCTATACTTAATCCCATGTCATGCGACCCTAGGACTTTTTT	CAMK1D	NM_020397	ref|Homo sapiens calcium/calmodulin-dependent protein kinase ID (CAMK1D), transcript variant 1, mRNA [NM_020397]
A_23_P124327	na	na	na	na	na	na	na	na	0.0283	down	-1.43	NSD1	8	ref|NM_022455|ref|NM_172349|gb|BC144629|gb|AF322907	CCACTGTTATTCTTTCCTCATATCCCAACACTCAGAACTCTTGTGACATTAGCCAGTGGG	NSD1	NM_022455	ref|Homo sapiens nuclear receptor binding SET domain protein 1 (NSD1), transcript variant 2, mRNA [NM_022455]
A_23_P124417	0.00223	down	-1.89	BUB1	0.0496317	down	-1.32	BUB1	0.0121	down	-1.71	BUB1	0	ref|NM_004336|gb|AK225317|gb|AK302418|ens|ENST00000302759	AGCCTGAAGGTCTTTTTAGAAGGCTTCCTCATTTGGATATGTGGAATGAATTTTTTCATG	BUB1	NM_004336	ref|Homo sapiens budding uninhibited by benzimidazoles 1 homolog (yeast) (BUB1), mRNA [NM_004336]
A_23_P124476	0.0208	down	-1.58	CLCN3	na	na	na	na	na	na	na	na	8	ref|NM_173872|ref|NM_001829|ens|ENST00000347613|ens|ENST00000360642	TGAGGTTTCATCACAAGAAGGGAGTGTTTCTTGTGGCATTAACCATGTAGTTTGTACCAT	CLCN3	NM_173872	ref|Homo sapiens chloride channel 3 (CLCN3), transcript variant e, mRNA [NM_173872]
A_23_P124570	0.0152	up	1.42	FER	na	na	na	na	na	na	na	na	8	ref|NM_005246|gb|AK299855|ens|ENST00000438717|gb|AK315234	TGCTGCTGGTATGTTGTATCTCGAGAGTAAAAACTGTATACACAGGGACCTTGCTGCAAG	FER	NM_005246	ref|Homo sapiens fer (fps/fes related) tyrosine kinase (FER), mRNA [NM_005246]
A_23_P124619	na	na	na	na	na	na	na	na	0.0296	up	4.63	S100A14	8	ref|NM_020672|ens|ENST00000344616|ens|ENST00000368702|ens|ENST00000368701	AGCTGGGCTATGGGAAATGATTTGAATAATGGAGCTGGGAATATGGCTGGATATCTGGTA	S100A14	NM_020672	ref|Homo sapiens S100 calcium binding protein A14 (S100A14), mRNA [NM_020672]
A_23_P12463	na	na	na	na	0.023456	up	1.32	QSOX1	0.0245	up	1.45	QSOX1	4	ref|NM_002826|ref|NM_001004128|gb|CR601148|gb|CR613263	TCACCTTCCAGTGTGCAGAAGTTAGAAGGGTCTGGCGGGGGCAGTGCCTTACACATGCTT	QSOX1	NM_002826	ref|Homo sapiens quiescin Q6 sulfhydryl oxidase 1 (QSOX1), transcript variant 1, mRNA [NM_002826]
A_23_P124742	0.00635	up	1.47	CHKA	na	na	na	na	na	na	na	na	8	ref|NM_001277|ref|NM_212469|ens|ENST00000265689|ens|ENST00000356135	AGCCTGTATGTGGTGTGGGGCGTGGATCGAGTGTAGCTGTGAAATCCATATATATGAAAT	CHKA	NM_001277	ref|Homo sapiens choline kinase alpha (CHKA), transcript variant 1, mRNA [NM_001277]
A_23_P12477	na	na	na	na	na	na	na	na	0.0297	up	1.5	SCMH1	8	ref|NM_012236|ref|NM_001172218|ref|NM_001031694|ref|NM_001172221	CTGGCCTCTCACCAGGAGTTTAGGCTGAATGCCTTCCACGTGATGGAGGAAAAGGCCAAC	SCMH1	NM_012236	ref|Homo sapiens sex comb on midleg homolog 1 (Drosophila) (SCMH1), transcript variant 2, mRNA [NM_012236]
A_23_P124837	na	na	na	na	na	na	na	na	0.0437	up	1.88	LRP1	8	ref|NM_002332|ens|ENST00000243077|gb|AB209498|gb|AK122840	GTGGAGATTGGAAACCCCACCTACAAGATGTACGAAGGCGGAGAGCCTGATGATGTGGGA	LRP1	NM_002332	ref|Homo sapiens low density lipoprotein receptor-related protein 1 (LRP1), mRNA [NM_002332]
A_23_P124905	0.00191	up	1.46	NPTX1	0.00715717	down	-3.67	NPTX1	0.0104	down	-1.52	NPTX1	0	ref|NM_002522|ens|ENST00000306773|gb|AK127335|gb|AK124701	TCAACTAACGATGGGAAATGTATTACTTCCGTACACAGTGGACTGAAGTGCAATTTGTTG	NPTX1	NM_002522	ref|Homo sapiens neuronal pentraxin I (NPTX1), mRNA [NM_002522]
A_23_P124927	na	na	na	na	na	na	na	na	0.0457	up	2.33	RGS14	8	ref|NM_006480|gb|AY987041|gb|CR607607|gb|AK098150	CCACGACCAGAGGGGCCTTCTGAGGAAAGAGGACCTGGTACTTCCAGAATTTCTGCAGCT	RGS14	NM_006480	ref|Homo sapiens regulator of G-protein signaling 14 (RGS14), mRNA [NM_006480]
A_23_P125078	na	na	na	na	na	na	na	na	0.0415	up	1.21	SLC26A11	8	ref|NM_173626|ref|NM_001166347|ref|NM_001166348|ref|NM_001166349	TACCTGTCCGTCAGTGTGTGGATGTATGTTTACAGTTCTACATAAATGGGATCATTTTAT	SLC26A11	NM_173626	ref|Homo sapiens solute carrier family 26, member 11 (SLC26A11), transcript variant 2, mRNA [NM_173626]
A_23_P12526	na	na	na	na	na	na	na	na	0.00922	down	-1.43	TP53BP2	8	ref|NM_005426|ref|NM_001031685|ens|ENST00000355274|ens|ENST00000343537	GACAATCCTGTTTTCTACAAGAATCCTGTCTAGTAAATAGGATCATTTATTGGGCAGTTG	TP53BP2	NM_005426	ref|Homo sapiens tumor protein p53 binding protein, 2 (TP53BP2), transcript variant 2, mRNA [NM_005426]
A_23_P125265	0.000804	down	-1.67	KPNA2	0.00316847	down	-1.57	KPNA2	na	na	na	na	4	ref|NM_002266|ref|NR_026899|gb|BC067848|ens|ENST00000400873	TGAAGGCTACACTTTCCAAGTTCAGGATGGGGCTCCTGGGACCTTTAACTTTTAGATCAT	KPNA2	NM_002266	ref|Homo sapiens karyopherin alpha 2 (RAG cohort 1, importin alpha 1) (KPNA2), mRNA [NM_002266]
A_23_P125348	na	na	na	na	0.00105281	down	-1.84	TRAPPC1	0.0214	up	2.93	TRAPPC1	4	ref|NM_021210|ref|NM_001166621|ens|ENST00000303731|gb|AK314038	GGATGCTCTTCTCTATCCGCTCGTTTGTCAGCAAGATGTCCCCGCTAGACATGAAGGATG	TRAPPC1	NM_021210	ref|Homo sapiens trafficking protein particle complex 1 (TRAPPC1), transcript variant 1, mRNA [NM_021210]
A_23_P125408	0.0118	up	1.69	DOHH	na	na	na	na	na	na	na	na	8	ref|NM_031304|ref|NM_001145165|ens|ENST00000427575|ens|ENST00000250937	CTAAACCGGGTGTGTGTAAATCGGTGTCATCGCTTGTGTCTTGCTGGGCGCACGGTTGCT	DOHH	NM_031304	ref|Homo sapiens deoxyhypusine hydroxylase/monooxygenase (DOHH), transcript variant 2, mRNA [NM_031304]
A_23_P125423	0.0245	down	-1.34	C1R	na	na	na	na	0.000148	up	4.94	C1R	4	ref|NM_001733|gb|M14058|gb|AK024951|gb|BC035220	AGGATATAGTTATCAATCTCTAGTTGTCACTTTCCTCTTCCACTTTGATACCATTGGGTC	C1R	NM_001733	ref|Homo sapiens complement component 1, r subcomponent (C1R), mRNA [NM_001733]
A_23_P125505	na	na	na	na	na	na	na	na	0.0129	up	1.64	PPEF1	8	ref|NM_006240|ref|NM_152224|ref|NM_152226|gb|AK290463	GGAAGTCCCTAGCAAGCTGTTATTGGTAAGATTAGGTTAAATGTCAGTAATAGGATTTGG	PPEF1	NM_006240	ref|Homo sapiens protein phosphatase, EF-hand calcium binding domain 1 (PPEF1), transcript variant 1, mRNA [NM_006240]
A_23_P125624	0.0183	up	1.39	ACOT9	na	na	na	na	0.0438	down	-1.26	ACOT9	4	ref|NM_001037171|ref|NM_001033583|gb|BC144370|gb|CR626755	TGAAGACCTGATCGAGTGTATTGATTTTAGTATTGCTTCGTGTCCTCCACACAGGAGGAG	ACOT9	NM_001037171	ref|Homo sapiens acyl-CoA thioesterase 9 (ACOT9), nuclear gene encoding mitochondrial protein, transcript variant 1, mRNA [NM_001037171]
A_23_P125643	0.00494	down	-1.67	ASB9	0.00854127	down	-6.61	ASB9	0.005	down	-1.64	ASB9	0	ref|NM_001031739|ref|NM_001168531|ref|NM_024087|ref|NM_001168530	GTCAAATTCAAATACAGGTTTTCTGACATTAACTTATGTGATGACTTGATCGAGGCAGGC	ASB9	NM_001031739	ref|Homo sapiens ankyrin repeat and SOCS box-containing 9 (ASB9), transcript variant 1, mRNA [NM_001031739]
A_23_P125829	na	na	na	na	0.0456057	down	-1.24	PGK1	0.0355	up	1.26	PGK1	4	ref|NM_000291|gb|AK301740|gb|CR621547|ens|ENST00000450919	TTAAACAGTTGCACAGCATCTCAGCTCATCTTCACTGCACCCTGGATTTGCATACATTCT	PGK1	NM_000291	ref|Homo sapiens phosphoglycerate kinase 1 (PGK1), mRNA [NM_000291]
A_23_P126057	0.0472	down	-1.94	SCP2	na	na	na	na	na	na	na	na	8	ref|NM_002979|ref|NM_001007099|ref|NM_001007100|ref|NM_001007250	ACATTGGCAAATAGCGTGGGATAGATTTGTTTCTTAATGGGTGTGACCAATCCTGTTTTT	SCP2	NM_002979	ref|Homo sapiens sterol carrier protein 2 (SCP2), transcript variant 1, mRNA [NM_002979]
A_23_P126075	0.0274	up	1.38	KCNK1	na	na	na	na	na	na	na	na	8	ref|NM_002245|gb|CR590911|gb|AK090902|ens|ENST00000366620	AGTATGCTGCTGTGGTTAGAAGCAGATTTTATACTTTTAACTGGAAACTTTGGGGTTTGC	KCNK1	NM_002245	ref|Homo sapiens potassium channel, subfamily K, member 1 (KCNK1), mRNA [NM_002245]
A_23_P126103	0.00342	up	2.32	CTH	na	na	na	na	na	na	na	na	8	ref|NM_001902|ref|NM_153742|ens|ENST00000411986|ens|ENST00000370938	ATGTTTGCCTCTGAAGGAGGTGAGATTTGTGCTACTTTGGGAGATTATGTTCTTTTTTCA	CTH	NM_001902	ref|Homo sapiens cystathionase (cystathionine gamma-lyase) (CTH), transcript variant 1, mRNA [NM_001902]
A_23_P126197	0.0116	down	-1.5	SFRS4	0.0188849	down	-1.71	SFRS4	0.0109	down	-1.43	SFRS4	0	ref|NM_005626|ens|ENST00000434636|ens|ENST00000373795|gb|L14076	GAATTGATGCCCTTCGATGTATGCCATTTAGTGAAAGTGCTAAGTCTTAAGTTTCCTACC	SFRS4	NM_005626	ref|Homo sapiens splicing factor, arginine/serine-rich 4 (SFRS4), mRNA [NM_005626]
A_23_P126241	0.0178	down	-1.29	EIF4G3	na	na	na	na	na	na	na	na	8	ref|NM_003760|gb|AK294883|gb|BC144335|gb|BC072413	TTTGCTGCGGATGTTTTTTGATTGTCTATATGACGAGGAGGTGATCTCCGAGGATGCCTT	EIF4G3	NM_003760	ref|Homo sapiens eukaryotic translation initiation factor 4 gamma, 3 (EIF4G3), mRNA [NM_003760]
A_23_P126266	0.0108	up	2.23	HLX	na	na	na	na	na	na	na	na	8	ref|NM_021958|ens|ENST00000427693|ens|ENST00000366902|ens|ENST00000366903	AGGCCTGGAGAAAAGGTTTGAGATTCAGAAGTACGTGACCAAGCCGGACCGAAAGCAGCT	HLX	NM_021958	ref|Homo sapiens H2.0-like homeobox (HLX), mRNA [NM_021958]
A_23_P12635	na	na	na	na	na	na	na	na	0.00667	up	1.5	FBXL15	8	ref|NM_024326|ens|ENST00000369954|ens|ENST00000224862|ens|ENST00000369956	GCTGGGGCCTGACACTGAGCTGTAGGGAAACTGAACTGTGAGGACCTCTGGTGAGAGGCC	FBXL15	NM_024326	ref|Homo sapiens F-box and leucine-rich repeat protein 15 (FBXL15), mRNA [NM_024326]
A_23_P126393	na	na	na	na	0.017191	up	1.32	SETDB1	na	na	na	na	8	ref|NM_012432|ref|NM_001145415|ens|ENST00000368969|ens|ENST00000271640	AACAGACTTTGTTCTTAGAATGGAGCCTGTGTATCTACTATCTCCAGTTTGTATTATTTC	SETDB1	NM_012432	ref|Homo sapiens SET domain, bifurcated 1 (SETDB1), transcript variant 2, mRNA [NM_012432]
A_23_P126499	na	na	na	na	na	na	na	na	0.0268	up	2.46	C1orf89	8	ref|NM_030907|ens|ENST00000375599|gb|CR594894|gb|BC002946	ACTCAAAAAGTTCGATCATATGCTGCTGGCTTGCATGGAGAACACAGATGCCTTCCTCTT	C1orf89	NM_030907	ref|Homo sapiens chromosome 1 open reading frame 89 (C1orf89), mRNA [NM_030907]
A_23_P126649	na	na	na	na	0.0448358	down	-1.75	PGBD5	0.00521	up	2.1	PGBD5	4	ref|NM_024554|ens|ENST00000321327|ens|ENST00000391860|gb|BC013901	ATTACTTGTCTTGAAAAATAAGTAGCATTGCTGAAACACACAACCGAATTCTCTACGATG	PGBD5	NM_024554	ref|Homo sapiens piggyBac transposable element derived 5 (PGBD5), mRNA [NM_024554]
A_23_P126716	0.00859	down	-1.22	ATPIF1	na	na	na	na	0.00655	up	1.45	ATPIF1	4	ref|NM_178191|ref|NM_178190|ref|NM_016311|ens|ENST00000417632	GTGTGCCATAGAATGGCACATGTCATTGCCCACTTCTGTGTAGACATGGTTCTGGTTTAA	ATPIF1	NM_178191	ref|Homo sapiens ATPase inhibitory factor 1 (ATPIF1), nuclear gene encoding mitochondrial protein, transcript variant 3, mRNA [NM_178191]
A_23_P126727	na	na	na	na	na	na	na	na	0.00311	down	-1.49	NOL9	8	ref|NM_024654|ens|ENST00000377705|gb|BC063639|gb|BC110849	GTTTCATGGCCATGAATGGTGCCCTTATTAACAACAGTGTTTTTTGTGTAATTCGTGAAT	NOL9	NM_024654	ref|Homo sapiens nucleolar protein 9 (NOL9), mRNA [NM_024654]
A_23_P12680	na	na	na	na	0.0254331	up	1.66	PSAP	0.00756	up	3.2	PSAP	4	ref|NM_001042465|ref|NM_001042466|ref|NM_002778|gb|CR616446	CCCTAGCCCCTGGCAGACATAGCTGCTTCAGTGCCCCTTTTCTCTCTGCTAGATGGATGT	PSAP	NM_001042465	ref|Homo sapiens prosaposin (PSAP), transcript variant 2, mRNA [NM_001042465]
A_23_P126803	na	na	na	na	0.01973	down	-2.01	ARPC5	na	na	na	na	8	ref|NM_005717|ens|ENST00000294742|ens|ENST00000359856|gb|CR613345	TGCCCTGTGGGTAGCATCTGTTTCTCTCAGCTTTGCCTTCTTGCTTTTTCATATCTGTAA	ARPC5	NM_005717	ref|Homo sapiens actin related protein 2/3 complex, subunit 5, 16kDa (ARPC5), mRNA [NM_005717]
A_23_P126844	na	na	na	na	na	na	na	na	0.0367	up	2.91	TNFRSF25	8	ref|NM_148965|ref|NM_003790|ref|NM_148966|ref|NM_148967	CGAGAGGGGGTGAAGACATTTCTCAACTTCTCGGCCGGAGTTTGGCTGAGATCGCGGTAT	TNFRSF25	NM_148965	ref|Homo sapiens tumor necrosis factor receptor superfamily, member 25 (TNFRSF25), transcript variant 1, mRNA [NM_148965]
A_23_P126908	na	na	na	na	na	na	na	na	0.04	up	1.7	TNFRSF14	8	ref|NM_003820|gb|CR615544|ens|ENST00000427661|ens|ENST00000355716	GGATACCACATCGGAAGTGATTTTCTAAATTGGATTTGAATTCGGCTCCTGTTTTCTATT	TNFRSF14	NM_003820	ref|Homo sapiens tumor necrosis factor receptor superfamily, member 14 (herpesvirus entry mediator) (TNFRSF14), mRNA [NM_003820]
A_23_P126939	na	na	na	na	na	na	na	na	0.0306	up	1.6	RAB7L1	8	ref|NM_003929|ref|NM_001135663|ref|NM_001135662|ref|NM_001135664	TACATCAATCTACAAACCAAGTCCTCCAGCTGGTCCTGCTGCTAGTAGTGTTTGGCTTAT	RAB7L1	NM_003929	ref|Homo sapiens RAB7, member RAS oncogene family-like 1 (RAB7L1), transcript variant 1, mRNA [NM_003929]
A_23_P127079	0.00494	up	1.5	PPRC1	na	na	na	na	na	na	na	na	8	ref|NM_015062|gb|AK025691|gb|BC063806|gb|AK299885	ACCGGGAAGACTTTGACCCAGCACCTGTAAAGAGCAAATTTGATTCTCTTGACTTTGACA	PPRC1	NM_015062	ref|Homo sapiens peroxisome proliferator-activated receptor gamma, coactivator-related 1 (PPRC1), mRNA [NM_015062]
A_23_P127088	na	na	na	na	na	na	na	na	0.0279	up	1.89	CUEDC2	8	ref|NM_024040|gb|AF086406|ens|ENST00000369937|gb|AB025425	TCCCAAGGAGGCCCCCAAGAAGCTGATCCGATACATCGACAACCAGGTAGTGAGCACCAA	CUEDC2	NM_024040	ref|Homo sapiens CUE domain containing 2 (CUEDC2), mRNA [NM_024040]
A_23_P127095	na	na	na	na	na	na	na	na	0.03	up	1.23	USMG5	8	ref|NM_032747|gb|AJ272056|ens|ENST00000369811|ens|ENST00000369815	TACGGTTCTTAACCTCATCTGTTAAGTTCCCATGCCTGGAGAAGCTAATGCCAACTCATC	USMG5	NM_032747	ref|Homo sapiens up-regulated during skeletal muscle growth 5 homolog (mouse) (USMG5), mRNA [NM_032747]
A_23_P127140	na	na	na	na	na	na	na	na	0.0204	down	-1.38	RAB11FIP2	8	ref|NM_014904|ens|ENST00000369199|ens|ENST00000355624|gb|AB023158	AAGGGTTTCATGAATGGAAACCTAAGTAAAACTAAGCTCATTAGTGACAGACTTGTTTTC	RAB11FIP2	NM_014904	ref|Homo sapiens RAB11 family interacting protein 2 (class I) (RAB11FIP2), mRNA [NM_014904]
A_23_P127175	na	na	na	na	na	na	na	na	0.00329	up	1.5	SAR1A	8	ref|NM_020150|ref|NM_001142648|gb|AK298591|ens|ENST00000395026	GAGGGTTTCCGCTGGCTCTCCCAGTATATTGACTGATGTTTGGACGGTGAAAATAAAAGA	SAR1A	NM_020150	ref|Homo sapiens SAR1 homolog A (S. cerevisiae) (SAR1A), transcript variant 2, mRNA [NM_020150]
A_23_P127279	na	na	na	na	na	na	na	na	0.022	down	-1.49	FAM35A	8	ref|NM_019054|ref|NR_027634|ref|NR_027632|gb|AF131775	TGCTACATTCCAGGCATTGTACTAAGTATGGGGAACCACAGAGAAGACATTCCCTCAGAA	FAM35A	NM_019054	ref|Homo sapiens family with sequence similarity 35, member A (FAM35A), mRNA [NM_019054]
A_23_P127367	na	na	na	na	na	na	na	na	0.0067	up	2.43	POLD4	8	ref|NM_021173|gb|CR623963|gb|BC001334|gb|CR612376	CTGCTGCCTGTCTCCCTGACCCATGATCTGGCAAGTTAGGCACAGTCAGACATGGACAGT	POLD4	NM_021173	ref|Homo sapiens polymerase (DNA-directed), delta 4 (POLD4), mRNA [NM_021173]
A_23_P127394	na	na	na	na	0.00847473	up	1.28	CRY2	0.0483	down	-1.18	CRY2	4	ref|NM_021117|ref|NM_001127457|ens|ENST00000263762|ens|ENST00000443527	AGATGGTTGCAGGCAAAATGCACTTTATAGAGATTTTCTATTGCTGGGAAGGTGTGTTTC	CRY2	NM_021117	ref|Homo sapiens cryptochrome 2 (photolyase-like) (CRY2), transcript variant 1, mRNA [NM_021117]
A_23_P127406	na	na	na	na	0.0332601	down	-1.31	KDM4D	0.0445	up	1.59	KDM4D	4	ref|NM_018039|ens|ENST00000335080|gb|BC119010|gb|BC122858	GGTTTTATCCACTGGACACATTTGTGTGTGAGAACTAGGTCTTGTTGAGGTTAGCGTAAC	KDM4D	NM_018039	ref|Homo sapiens lysine (K)-specific demethylase 4D (KDM4D), mRNA [NM_018039]
A_23_P127446	na	na	na	na	0.0189249	up	1.51	DPF2	na	na	na	na	8	ref|NM_006268|gb|CR614117|ens|ENST00000252268|ens|ENST00000415073	ATAGACATCCCTTTCTTCCCTTGCACGCTCGCTAGCAGCTGGTAAGGTCTTCACACCCTG	DPF2	NM_006268	ref|Homo sapiens D4, zinc and double PHD fingers family 2 (DPF2), mRNA [NM_006268]
A_23_P127460	na	na	na	na	na	na	na	na	0.0322	up	1.89	SIPA1	8	ref|NM_153253|ref|NM_006747|gb|AK303551|ens|ENST00000394224	AAATCTGATGCTGAGCCAGAGCCTGGGAACCTCTCAGAGAAGGTCTCTCACTTGGAGTCC	SIPA1	NM_153253	ref|Homo sapiens signal-induced proliferation-associated 1 (SIPA1), transcript variant 1, mRNA [NM_153253]
A_23_P127522	na	na	na	na	0.0265453	down	-1.44	HYLS1	na	na	na	na	8	ref|NM_145014|ref|NM_001134793|ens|ENST00000425380|ens|ENST00000356438	CCCGGTATTTTGAGTACAAACGGGACTGGGACTCAATACGTTTACCTGGTGAAGATCATA	HYLS1	NM_145014	ref|Homo sapiens hydrolethalus syndrome 1 (HYLS1), transcript variant 1, mRNA [NM_145014]
A_23_P127533	0.0124	up	1.52	DCUN1D5	na	na	na	na	na	na	na	na	8	ref|NM_032299|ens|ENST00000260247|gb|CR625928|gb|CR597372	TTTTTTAAAGGAGGTTTTTCTTGTTACATGTGATGGGCATTGAGCCACACCTCTTCTTAG	DCUN1D5	NM_032299	ref|Homo sapiens DCN1, defective in cullin neddylation 1, domain containing 5 (S. cerevisiae) (DCUN1D5), mRNA [NM_032299]
A_23_P127579	na	na	na	na	0.0335742	down	-1.49	PTS	0.00861	up	1.3	PTS	4	ref|NM_000317|ens|ENST00000280362|gb|M97655|gb|D17400	GTGGTTTATAAAGGAGAATAGCTATTGGGGTTAGCATTGCACAAAGCCCAGTTTCTTTCT	PTS	NM_000317	ref|Homo sapiens 6-pyruvoyltetrahydropterin synthase (PTS), mRNA [NM_000317]
A_23_P127584	0.00308	up	1.3	NNMT	0.0222638	up	1.7	NNMT	0.000367	up	2.46	NNMT	0	ref|NM_006169|gb|BC000234|ens|ENST00000299964|gb|CR541907	CTGCTGTGAAAGAGGCTGGCTACACAATCGAATGGTTTGAGGTGATCTCGCAAAGTTATT	NNMT	NM_006169	ref|Homo sapiens nicotinamide N-methyltransferase (NNMT), mRNA [NM_006169]
A_23_P127652	0.0257	up	2.02	ZNF202	na	na	na	na	na	na	na	na	8	ref|NM_003455|gb|AK226047|ens|ENST00000336139|gb|AL162031	GTTAAAGGTTCCTTGGAGATGAGGCTGAATAATTATGAACCTCACCTTCTCTGATTGTGG	ZNF202	NM_003455	ref|Homo sapiens zinc finger protein 202 (ZNF202), mRNA [NM_003455]
A_23_P127663	na	na	na	na	0.0252331	down	-1.69	PRRG4	na	na	na	na	8	ref|NM_024081|ens|ENST00000257836|gb|AF326351|gb|BC010052	TGGGCACACAAAAGGATTTAGGGTATTTAAAAAATCTATGTCTCTCCCATCTCACTGACT	PRRG4	NM_024081	ref|Homo sapiens proline rich Gla (G-carboxyglutamic acid) 4 (transmembrane) (PRRG4), mRNA [NM_024081]
A_23_P127676	0.037	down	-1.37	CTR9	0.0025027	down	-1.75	CTR9	0.0321	down	-1.47	CTR9	0	ref|NM_014633|ens|ENST00000361367|gb|AK291794|gb|D63875	TAAACCCAGATGCTAAATCATTCCTACAAAGGTTTGACTGAAACTGTGGCAGATGTCTCA	CTR9	NM_014633	ref|Homo sapiens Ctr9, Paf1/RNA polymerase II complex component, homolog (S. cerevisiae) (CTR9), mRNA [NM_014633]
A_23_P127793	na	na	na	na	0.0275235	down	-1.42	EML3	0.00487	up	2.34	EML3	4	ref|NM_153265|gb|AK296901|gb|AX747954|gb|AK128679	TGCAAGCAGCTGAAGAATCGCTATGAGAGCCGAGACCGGGAATGGGCTACCTACACCTGT	EML3	NM_153265	ref|Homo sapiens echinoderm microtubule associated protein like 3 (EML3), mRNA [NM_153265]
A_23_P12784	0.0044	down	-1.89	FRAT2	0.0478435	down	-1.18	FRAT2	na	na	na	na	4	ref|NM_012083|ens|ENST00000371019|gb|AB045118|gb|BC020165	CTGTATGAAACTTGACGGCGCTTTTGTAAGGTGCCACCCCCAAACTTTAAGGTAGCTAAA	FRAT2	NM_012083	ref|Homo sapiens frequently rearranged in advanced T-cell lymphomas 2 (FRAT2), mRNA [NM_012083]
A_23_P127891	0.0473	up	1.48	BDNF	0.00481845	down	-1.78	BDNF	na	na	na	na	4	ref|NM_170735|ref|NM_001143816|ref|NM_170731|ref|NM_001143811	AGGTTCAAGAGGCTTGACATCATTGGCTGACACTTTCGAACACGTGATAGAAGAGCTGTT	BDNF	NM_170735	ref|Homo sapiens brain-derived neurotrophic factor (BDNF), transcript variant 1, mRNA [NM_170735]
A_23_P127911	na	na	na	na	0.0166896	down	-4.45	PAMR1	na	na	na	na	8	ref|NM_015430|ref|NM_001001991|gb|AK300185|gb|AK297092	ATGCTCATGCACTCCTTGAGAAGTGTTTCTGTATATCCGTCTGTACGTGTGTCATTGCGT	PAMR1	NM_015430	ref|Homo sapiens peptidase domain containing associated with muscle regeneration 1 (PAMR1), transcript variant 1, mRNA [NM_015430]
A_23_P127948	8.77e-05	up	4.14	ADM	0.023835	up	1.47	ADM	na	na	na	na	4	ref|NM_001124|gb|CR620623|gb|CR599617|ens|ENST00000278175	GTGTAAAGTTGTTCGCCGCGTGGAATGTGAGTGTGTTTGTGTGCATGAAAGAGAAAGACT	ADM	NM_001124	ref|Homo sapiens adrenomedullin (ADM), mRNA [NM_001124]
A_23_P127964	na	na	na	na	na	na	na	na	0.0224	up	1.16	PRCP	8	ref|NM_199418|ref|NM_005040|ens|ENST00000393399|ens|ENST00000313010	ATGTAATTGCAGCTGGTAGGATGTCTGGTGCCAATCCAGGAAGTGAGAGCCATTTCTTTT	PRCP	NM_199418	ref|Homo sapiens prolylcarboxypeptidase (angiotensinase C) (PRCP), transcript variant 2, mRNA [NM_199418]
A_23_P127995	na	na	na	na	0.00841251	up	1.44	CLNS1A	na	na	na	na	8	ref|NM_001293|gb|CR604322|ens|ENST00000263309|gb|AF005422	GGGAAAGAGAGAGCTCCTTTCGCCATGTTTTACCAGTCTGCTGTTATAACCTCTTAGGTT	CLNS1A	NM_001293	ref|Homo sapiens chloride channel, nucleotide-sensitive, 1A (CLNS1A), mRNA [NM_001293]
A_23_P128073	0.0162	down	-1.39	SMARCC2	na	na	na	na	na	na	na	na	8	ref|NM_139067|ref|NM_003075|ref|NM_001130420|gb|AK293896	CAAGGTTCTATTAACCACTTCTAAGGGTACACCTCCCTCCAAACTACTGCATTTTCTATG	SMARCC2	NM_139067	ref|Homo sapiens SWI/SNF related, matrix associated, actin dependent regulator of chromatin, subfamily c, member 2 (SMARCC2), transcript variant 2, mRNA [NM_139067]
A_23_P128147	na	na	na	na	0.01361	down	-1.31	TUBA1B	0.00247	down	-1.5	TUBA1B	4	ref|NM_006082|gb|AK094717|gb|CR613187|gb|CR612379	GCTTCAGCTTAACTGACAGATGTTAAAGCTTTCTGGTTAGATTGTTTTCACTTGGTGATC	TUBA1B	NM_006082	ref|Homo sapiens tubulin, alpha 1b (TUBA1B), mRNA [NM_006082]
A_23_P128166	0.0341	up	1.23	RAB21	0.0355637	up	1.14	RAB21	na	na	na	na	4	ref|NM_014999|ens|ENST00000261263|gb|CR590140|gb|CR600765	CAGATATCTGAAGTACTATTTTTGCAGGGTTTGCACAGGCCCGTAACTGTCTACTACTTT	RAB21	NM_014999	ref|Homo sapiens RAB21, member RAS oncogene family (RAB21), mRNA [NM_014999]
A_23_P128215	0.00243	up	9.09	SOCS2	0.0143857	up	1.88	SOCS2	na	na	na	na	4	ref|NM_003877|gb|CR595909|gb|AF037989|gb|BC070039	CCAAGTTGTCCTTGAATTGTCTAACCATGGACATAAACAGTTGTCTCCCTTCTACTGTGT	SOCS2	NM_003877	ref|Homo sapiens suppressor of cytokine signaling 2 (SOCS2), mRNA [NM_003877]
A_23_P128281	na	na	na	na	na	na	na	na	0.0124	up	1.46	KLRC3	8	ref|NM_007333|ref|NM_002261|ref|NM_002260|ref|NM_213658	AAATGGTTTGGCTTTCAAACATGAGATAAAAGACTCAGATCATGCTGAACGTAACTGTGC	KLRC3	NM_007333	ref|Homo sapiens killer cell lectin-like receptor subfamily C, member 3 (KLRC3), transcript variant 2, mRNA [NM_007333]
A_23_P128323	na	na	na	na	na	na	na	na	0.00355	up	2.59	SCNN1A	8	ref|NM_001038|ref|NM_001159576|ref|NM_001159575|gb|BC037417	GGAGCTTTGACAAGGAACTTTCCTAAGAAACCGCTGATAACCAGGACAAAACACAACCAA	SCNN1A	NM_001038	ref|Homo sapiens sodium channel, nonvoltage-gated 1 alpha (SCNN1A), transcript variant 1, mRNA [NM_001038]
A_23_P128375	na	na	na	na	0.0203357	down	-1.71	C12orf34	na	na	na	na	8	ref|NM_032829|gb|BC020193|ens|ENST00000358906|gb|AK074806	TGTCCCACACGATCAAGGCAGGGAAAGATAGGCAGGAGTCCCCTCACGAAGTCCTCAAGT	C12orf34	NM_032829	ref|Homo sapiens chromosome 12 open reading frame 34 (C12orf34), mRNA [NM_032829]
A_23_P128532	0.0258	up	1.45	C12orf45	0.0023802	up	1.59	C12orf45	0.0207	down	-1.64	C12orf45	0	ref|NM_152318|ens|ENST00000280749|gb|DQ891649|gb|DQ894838	TTGAAAACATTGATGGGCCTCATAGTAAAGTTATACAAATGGATGTGGCTTTGTTTGAGA	C12orf45	NM_152318	ref|Homo sapiens chromosome 12 open reading frame 45 (C12orf45), mRNA [NM_152318]
A_23_P128543	0.0395	down	-1.2	MED4	na	na	na	na	na	na	na	na	8	ref|NM_014166|gb|AK301835|ens|ENST00000378594|ens|ENST00000258648	AAGTAACAAAAACTGCCATTTGACAGTAAAGGCTCTTGGCTTCTGTTGGAGGCATGGGAA	MED4	NM_014166	ref|Homo sapiens mediator complex subunit 4 (MED4), mRNA [NM_014166]
A_23_P128554	0.0483	down	-1.32	EBPL	na	na	na	na	na	na	na	na	8	ref|NM_032565|gb|BC073152|gb|BC021021|ens|ENST00000242827	CCTGTTTCAAATTGGTTTTAAGGCGACCAGTTTTCGTTGTATTGTTGTTCAATTAAATGG	EBPL	NM_032565	ref|Homo sapiens emopamil binding protein-like (EBPL), mRNA [NM_032565]
A_23_P128574	na	na	na	na	na	na	na	na	0.00122	down	-2.42	ENOX1	8	ref|NM_017993|ref|NM_001127615|gb|CR594606|gb|AK000956	GACAGATCTGTTTCCTATGAAAACCAAACAATGATTCCACAGTCATAATGATGGCAAAAT	ENOX1	NM_017993	ref|Homo sapiens ecto-NOX disulfide-thiol exchanger 1 (ENOX1), transcript variant 1, mRNA [NM_017993]
A_23_P128598	na	na	na	na	na	na	na	na	0.00106	down	-2.62	TUBA3C	8	ref|NM_006001|ref|NM_080386|ens|ENST00000360801|ens|ENST00000400113	ACGGCAAGTACATGGCCTGCTGCATGTTGTACAGGGGGGATGTGGTCCCGAAAGATGTCA	TUBA3C	NM_006001	ref|Homo sapiens tubulin, alpha 3c (TUBA3C), mRNA [NM_006001]
A_23_P128624	na	na	na	na	0.0296524	up	1.53	CARS2	0.0321	up	1.19	CARS2	4	ref|NM_024537|ens|ENST00000375781|gb|CR606350|gb|AK092947	CTTCTCAGGGTCAAGGCTTTATGTTAAAGCTTCCTGTCGGGGCTGCTAGGTCAGCATTAA	CARS2	NM_024537	ref|Homo sapiens cysteinyl-tRNA synthetase 2, mitochondrial (putative) (CARS2), nuclear gene encoding mitochondrial protein, mRNA [NM_024537]
A_23_P12866	na	na	na	na	0.0213486	up	2.25	PSTK	na	na	na	na	8	ref|NM_153336|ens|ENST00000420769|ens|ENST00000406217|ens|ENST00000368887	GCTTTGGAAAATCCAGTAAAATATGCTGAGGACAATATGGAACAAAAGGACACAGACAGA	PSTK	NM_153336	ref|Homo sapiens phosphoseryl-tRNA kinase (PSTK), mRNA [NM_153336]
A_23_P128698	0.00221	up	2.27	SPRY2	na	na	na	na	0.0302	up	1.4	SPRY2	4	ref|NM_005842|gb|BC004205|ens|ENST00000377102|ens|ENST00000377104	AGAACTTGGTGACCCATGTATTGCATAAGCTAAAGCAACACAGACACTCCTAGGCAAAGT	SPRY2	NM_005842	ref|Homo sapiens sprouty homolog 2 (Drosophila) (SPRY2), mRNA [NM_005842]
A_23_P128728	na	na	na	na	0.0492462	down	-2.19	ARG2	na	na	na	na	8	ref|NM_001172|ens|ENST00000261783|gb|AK312484|gb|CR536550	TTTGGTCAGACAAGAGAAGGAGGGCATATTGTCTATGACCAACTTCCTACTCCCAGTTCA	ARG2	NM_001172	ref|Homo sapiens arginase, type II (ARG2), nuclear gene encoding mitochondrial protein, mRNA [NM_001172]
A_23_P128734	0.0264	down	-1.2	ERH	na	na	na	na	0.0194	down	-1.22	ERH	4	ref|NM_004450|ens|ENST00000216520|gb|AK130850|gb|CR618598	AACTGTTCATATCTACTTTATAACATTCACATACTAACCCTTCTTCAAGATGGGGTGGGG	ERH	NM_004450	ref|Homo sapiens enhancer of rudimentary homolog (Drosophila) (ERH), mRNA [NM_004450]
A_23_P12874	0.00506	up	1.47	GTPBP4	na	na	na	na	na	na	na	na	8	ref|NM_012341|gb|AK301721|gb|CR613289|gb|AF325353	TTGCTTCAGATTTTCAGAACTGGGAAGATTTACTGGTGTAACTGGGTTGTTTTTGATGGA	GTPBP4	NM_012341	ref|Homo sapiens GTP binding protein 4 (GTPBP4), mRNA [NM_012341]
A_23_P128744	na	na	na	na	na	na	na	na	0.0166	up	23.86	BDKRB1	8	ref|NM_000710|ens|ENST00000216629|gb|U12512|gb|AK291970	CCCCTAAAAGTCTTGCTCCAATATCTTCATCCCATAGGAAAGAAATCTTCCAACTTTTCT	BDKRB1	NM_000710	ref|Homo sapiens bradykinin receptor B1 (BDKRB1), mRNA [NM_000710]
A_23_P128817	0.00893	up	2.23	PCK2	0.00957752	up	4.26	PCK2	0.0299	up	1.88	PCK2	0	ref|NM_004563|gb|CR602594|gb|AK301400|gb|BC064427	CTGGGCAAACCCTGGAAACCTGGTGACAAGGAGCCCTGTGCACATCCCAACTCTCGATTT	PCK2	NM_004563	ref|Homo sapiens phosphoenolpyruvate carboxykinase 2 (mitochondrial) (PCK2), nuclear gene encoding mitochondrial protein, transcript variant 1, mRNA [NM_004563]
A_23_P12884	na	na	na	na	na	na	na	na	0.000568	up	1.52	GRK5	8	ref|NM_005308|gb|AK298261|ens|ENST00000392870|gb|L15388	ATGAAGTGAGACTTTGAGGGTGTATATTTTCTGTGCAGCCACTGTTAAGCCATGTGTTCC	GRK5	NM_005308	ref|Homo sapiens G protein-coupled receptor kinase 5 (GRK5), mRNA [NM_005308]
A_23_P128956	0.00918	down	-1.66	ZFYVE1	0.00300377	down	-1.51	ZFYVE1	0.00599	up	1.86	ZFYVE1	0	ref|NM_021260|ref|NM_178441|gb|BC014902|ens|ENST00000318876	TGTCATGACTGGAAAGGGCCCGTTGTGCTGAAATCCTATCATCATGGTGGATTTGATCTT	ZFYVE1	NM_021260	ref|Homo sapiens zinc finger, FYVE domain containing 1 (ZFYVE1), transcript variant 1, mRNA [NM_021260]
A_23_P128967	na	na	na	na	na	na	na	na	0.0276	up	1.8	ALDH6A1	8	ref|NM_005589|gb|AK294243|gb|AK311478|ens|ENST00000350259	AGGGAACTGCCTAGTGTAACAATGAAACCAGATTTCTCACTTGCTCTTCATACTTCTATT	ALDH6A1	NM_005589	ref|Homo sapiens aldehyde dehydrogenase 6 family, member A1 (ALDH6A1), nuclear gene encoding mitochondrial protein, mRNA [NM_005589]
A_23_P129014	0.0347	down	-1.46	C14orf143	0.0439797	up	1.77	C14orf143	0.0328	up	1.5	C14orf143	0	ref|NM_145231	GAACTATGGACAGAAGGAAGCCTAACTATTGTGAACTACTTTTGGTAACTCTGGGGAGAT	C14orf143	NM_145231	ref|Homo sapiens chromosome 14 open reading frame 143 (C14orf143), mRNA [NM_145231]
A_23_P129075	na	na	na	na	0.00814701	down	-1.39	WDR76	na	na	na	na	8	ref|NM_024908|ref|NM_001167941|ens|ENST00000381246|ens|ENST00000263795	TGTTCAAATTGACCACTGTCTAAGGAGCCTAGTAATCGGCGTGCCTTAGTGTGTTTATGT	WDR76	NM_024908	ref|Homo sapiens WD repeat domain 76 (WDR76), transcript variant 1, mRNA [NM_024908]
A_23_P129101	na	na	na	na	na	na	na	na	0.00262	up	2.14	HEXA	8	ref|NM_000520|gb|AK310154|gb|AK301138|gb|AK307770	GCCCTGACTGGAAGGATTTCTACGTAGTGGAACCCCTGGCATTTGAAGGTACCCCTGAGC	HEXA	NM_000520	ref|Homo sapiens hexosaminidase A (alpha polypeptide) (HEXA), mRNA [NM_000520]
A_23_P129103	na	na	na	na	0.0124884	up	1.89	LOC80154	na	na	na	na	8	ref|NR_026811|ref|NR_027001|gb|AK026448|gb|AK074778	TGGGACTGTGCGCTGGACTTGGAGCCCCTTGGAGTATGGCTTTTCACACGGGCTTCTATA	LOC80154	NR_026811	ref|Homo sapiens hypothetical LOC80154 (LOC80154), non-coding RNA [NR_026811]
A_23_P12911	0.0193	up	1.37	C11orf24	na	na	na	na	0.00789	down	-1.26	C11orf24	4	ref|NM_022338|gb|CR595092|ens|ENST00000304271|gb|CR623094	CTTTCCTTTTGCCTTTGAGACCAAACCAAGTGCTTCCAAATTCTTTTGGTGCAATTGAGG	C11orf24	NM_022338	ref|Homo sapiens chromosome 11 open reading frame 24 (C11orf24), mRNA [NM_022338]
A_23_P129144	na	na	na	na	na	na	na	na	0.0277	up	4.35	GCOM1	8	ref|NM_001018100|gb|AY334560|gb|AY333779|ens|ENST00000396180	TAGATGACATGGTGCATTGCCAGCAGAAGAAAGTCAAGCAGATGGTCGAGGAGATTGAAT	GCOM1	NM_001018100	ref|Homo sapiens GRINL1A complex locus (GCOM1), transcript variant 12, mRNA [NM_001018100]
A_23_P129157	na	na	na	na	na	na	na	na	0.0374	up	1.65	NEIL1	8	ref|NM_024608|gb|BC010876|ens|ENST00000336572|ens|ENST00000355059	TAGCAGGAGGCTCTCCTTGCTTGCACTCACCCTTTCTTATTGTCTTGCCCTGCATCTGGG	NEIL1	NM_024608	ref|Homo sapiens nei endonuclease VIII-like 1 (E. coli) (NEIL1), mRNA [NM_024608]
A_23_P129169	na	na	na	na	na	na	na	na	0.0128	up	6.86	CYP11A1	8	ref|NM_000781|ref|NM_001099773|gb|CR596946|gb|AK292301	CCGAGAGCCCACCTTCTTCTTCGACCCGGAAAATTTTGACCCAACCCGATGGCTGAGCAA	CYP11A1	NM_000781	ref|Homo sapiens cytochrome P450, family 11, subfamily A, polypeptide 1 (CYP11A1), nuclear gene encoding mitochondrial protein, transcript variant 1, mRNA [NM_000781]
A_23_P129188	0.00492	down	-1.69	CALML4	0.0261357	up	1.18	CALML4	na	na	na	na	4	ref|NM_033429|ref|NM_001031733|gb|CR598967|gb|BX640817	ACCCAATGGCAAAGTGAAGTATGATGAATTTATCCACAAGATCACCCTTCCTGGACGGGA	CALML4	NM_033429	ref|Homo sapiens calmodulin-like 4 (CALML4), transcript variant 1, mRNA [NM_033429]
A_23_P129209	na	na	na	na	0.0181558	down	-2.72	IDH2	0.00449	up	1.98	IDH2	4	ref|NM_002168|gb|AK294148|gb|CR610749|gb|AK299987	GCGTTTCAAGGACATCTTCCAGGAGATCTTTGACAAGCACTATAAGACCGACTTCGACAA	IDH2	NM_002168	ref|Homo sapiens isocitrate dehydrogenase 2 (NADP+), mitochondrial (IDH2), nuclear gene encoding mitochondrial protein, mRNA [NM_002168]
A_23_P129221	na	na	na	na	0.0254374	up	1.54	FAH	na	na	na	na	8	ref|NM_000137|gb|CR603970|gb|X51728|gb|CR600618	TATCTGTGCCATGACGAGCCCTACACATTTGACATCAACCTCTCTGTTAACCTGAAAGGA	FAH	NM_000137	ref|Homo sapiens fumarylacetoacetate hydrolase (fumarylacetoacetase) (FAH), mRNA [NM_000137]
A_23_P129246	0.0179	down	-1.61	PLEKHO2	0.0147332	down	-1.56	PLEKHO2	na	na	na	na	4	ref|NM_025201|gb|CR591221|gb|BC008744|ens|ENST00000323544	GTAGGCAAGTAGCTCTGGGGCCACCTCAAGTGACCAAATGCTATTAATTTCCATCCTTTA	PLEKHO2	NM_025201	ref|Homo sapiens pleckstrin homology domain containing, family O member 2 (PLEKHO2), mRNA [NM_025201]
A_23_P129334	na	na	na	na	na	na	na	na	0.0337	up	1.92	CLCN7	8	ref|NM_001287|ref|NM_001114331|gb|CR613527|gb|AK096963	TTGGGTACACAGGCCCAGAGGACTGGGGTGACTCACGGGCCCTGTGCTGTGATGTTGAGA	CLCN7	NM_001287	ref|Homo sapiens chloride channel 7 (CLCN7), transcript variant 1, mRNA [NM_001287]
A_23_P129358	na	na	na	na	0.0461727	up	1.43	SETD6	0.0478	down	-1.23	SETD6	4	ref|NM_024860|ref|NM_001160305|gb|BC110433|ens|ENST00000422445	ACTTTGGAGGTAGACCCCTGGTTTAAATCTAAGTCTAGTTTGAGGAAGTCACTTAACCTT	SETD6	NM_024860	ref|Homo sapiens SET domain containing 6 (SETD6), transcript variant 2, mRNA [NM_024860]
A_23_P129486	0.00256	down	-1.57	SEPX1	0.00144034	down	-1.77	SEPX1	na	na	na	na	4	ref|NM_016332|ens|ENST00000361871|gb|CR590497|gb|CR614779	TTGGCCTCTCGTCCACGAGGGGAGAAACCTAAACCCTGTTTCACAATCTGTGCGGAAGTA	SEPX1	NM_016332	ref|Homo sapiens selenoprotein X, 1 (SEPX1), mRNA [NM_016332]
A_23_P129513	na	na	na	na	na	na	na	na	0.0465	up	1.27	MRPL28	8	ref|NM_006428|gb|CR604432|gb|CR614424|ens|ENST00000441883	AGCAGAGACTTTTGGAGGAGAAGGACCCTGTACCCCTGTTCAAGATCTATGTGGCGGAGC	MRPL28	NM_006428	ref|Homo sapiens mitochondrial ribosomal protein L28 (MRPL28), nuclear gene encoding mitochondrial protein, mRNA [NM_006428]
A_23_P129556	0.00887	up	2.03	IL4R	0.0282491	up	1.64	IL4R	0.0209	up	2.17	IL4R	0	ref|NM_000418|gb|BC110343|ens|ENST00000170630|ens|ENST00000395762	GTCTGTGTGTTTTAGTTTCATCACCTGTTATCTGTGTTTGCTGAGGAGAGTGGAACAGAA	IL4R	NM_000418	ref|Homo sapiens interleukin 4 receptor (IL4R), transcript variant 1, mRNA [NM_000418]
A_23_P129695	0.0197	down	-1.44	VASN	0.00442844	up	1.73	VASN	na	na	na	na	4	ref|NM_138440|ens|ENST00000304735|gb|CR625381|gb|AY358298	TATTCTGGGAAGATGTTTTTCAAACTCAGAGACAAGGACTTTGGTTTTTGTAAGACAAAC	VASN	NM_138440	ref|Homo sapiens vasorin (VASN), mRNA [NM_138440]
A_23_P129704	na	na	na	na	0.030227	up	1.26	TERF2IP	na	na	na	na	8	ref|NM_018975|ens|ENST00000300086|gb|CR605991|gb|CR612877	AATGCTGTATTCATTTTGCTAACTTAGTATTTGGGTACCCTGCTCTTTGGCTGTTCTTTT	TERF2IP	NM_018975	ref|Homo sapiens telomeric repeat binding factor 2, interacting protein (TERF2IP), mRNA [NM_018975]
A_23_P129786	0.0158	down	-1.92	SREBF1	0.00240254	down	-2.28	SREBF1	na	na	na	na	4	ref|NM_001005291|ref|NM_004176|gb|AK095325|gb|AB209609	GGCTCCTGTGCTACTTTGCCTTTTGCAAACTTTATTTTCATAGATTGAGAAGTTTTGTAC	SREBF1	NM_001005291	ref|Homo sapiens sterol regulatory element binding transcription factor 1 (SREBF1), transcript variant 1, mRNA [NM_001005291]
A_23_P129801	0.0367	down	-1.32	RAB40B	0.0183927	down	-1.44	RAB40B	na	na	na	na	4	ref|NM_006822|gb|BC035814|ens|ENST00000269347|gb|CR604923	TCGAATTTCTACGTGGATGTGCATGAAGCTCTTGTTTTCGATGTGTGTTTGTAAAGGGAA	RAB40B	NM_006822	ref|Homo sapiens RAB40B, member RAS oncogene family (RAB40B), mRNA [NM_006822]
A_23_P129856	na	na	na	na	na	na	na	na	0.0213	up	1.94	HIC1	8	ref|NM_006497|ref|NM_001098202|ens|ENST00000399849|ens|ENST00000322941	TGATAATGTGAAGTTCCTCATTTTGCACAAGTGGCACTAGCCCCAGGGCCAACCCTTCCT	HIC1	NM_006497	ref|Homo sapiens hypermethylated in cancer 1 (HIC1), transcript variant 1, mRNA [NM_006497]
A_23_P12989	na	na	na	na	na	na	na	na	0.0241	up	1.48	PRDX5	8	ref|NM_012094|ref|NM_181651|ref|NM_181652|gb|CR625609	ATCTTTGGGAATCGACGTCTCAAGAGGTTCTCCATGGTGGTACAGGATGGCATAGTGAAG	PRDX5	NM_012094	ref|Homo sapiens peroxiredoxin 5 (PRDX5), nuclear gene encoding mitochondrial protein, transcript variant 1, mRNA [NM_012094]
A_23_P129903	na	na	na	na	0.00851647	up	1.67	TRIM16L	na	na	na	na	8	ref|NM_001037330|ref|NM_006470|gb|AK293428|gb|BC015674	ACATTCTCCAGCTGCTCTCTTTTGCTCCATATGGTGCTGTTCTCTATGTGTTTGCAGTAA	TRIM16L	NM_001037330	ref|Homo sapiens tripartite motif-containing 16-like (TRIM16L), mRNA [NM_001037330]
A_23_P12992	0.0125	down	-1.16	TRMT112	na	na	na	na	0.00736	up	1.23	TRMT112	4	ref|NM_016404|ens|ENST00000308774|gb|AF110774|gb|BC017172	TTTTGTTGATCTATACCCTGTTTCCGAATTCTGCCGTGTGTATCCCCAACCCTTGACCCA	TRMT112	NM_016404	ref|Homo sapiens tRNA methyltransferase 11-2 homolog (S. cerevisiae) (TRMT112), mRNA [NM_016404]
A_23_P129956	na	na	na	na	na	na	na	na	0.0235	up	1.47	DUSP3	8	ref|NM_004090|gb|AK226170|ens|ENST00000226004|gb|AK055834	ATTAGAGCGCCAAATGGTTTTCTTCTCAATCTTAAAGCAGTATACCTTTCCACAGGCTCG	DUSP3	NM_004090	ref|Homo sapiens dual specificity phosphatase 3 (DUSP3), mRNA [NM_004090]
A_23_P130040	na	na	na	na	na	na	na	na	0.0194	down	-1.34	PHB	8	ref|NM_002634|ens|ENST00000300408|gb|AK223181|gb|CR626185	CTGTCTGTTACCATAAGTCTGATTCTCTTTAACTGTGTGACCAGCGGAAACAGGTGTGTG	PHB	NM_002634	ref|Homo sapiens prohibitin (PHB), mRNA [NM_002634]
A_23_P130149	0.00966	up	1.66	ENO3	0.00051633	down	-3.63	ENO3	na	na	na	na	4	ref|NM_001976|ref|NM_053013|gb|AK300709|gb|AK300673	CTCGGAGCGTCTGGCCAAATACAACCAACTCATGAGGATCGAGGAGGCTCTTGGGGACAA	ENO3	NM_001976	ref|Homo sapiens enolase 3 (beta, muscle) (ENO3), transcript variant 1, mRNA [NM_001976]
A_23_P130182	0.0181	down	-1.48	AURKB	0.00132917	down	-1.65	AURKB	na	na	na	na	4	ref|NM_004217|gb|AK297976|gb|AF004022|gb|AY677083	AATAGCAGTGGGACACCCGACATCTTAACGCGGCACTTCACAATTGATGACTTTGAGATT	AURKB	NM_004217	ref|Homo sapiens aurora kinase B (AURKB), mRNA [NM_004217]
A_23_P130194	0.0111	up	1.43	PYCR1	0.00281742	up	1.72	PYCR1	na	na	na	na	4	ref|NM_006907|ref|NM_153824|gb|CR590479|gb|CR611221	CCCTGCCTGTGTGGGAGGGTGGTTACTGTGGGTGGAATAGTGGAGGCCTTCAACTGATTA	PYCR1	NM_006907	ref|Homo sapiens pyrroline-5-carboxylate reductase 1 (PYCR1), transcript variant 1, mRNA [NM_006907]
A_23_P130343	0.00456	down	-1.42	KCTD1	na	na	na	na	0.0173	up	1.36	KCTD1	4	ref|NM_198991|ref|NM_001142730|ref|NM_001136205|ens|ENST00000417602	AGAGACCACACCTGTATTCATATGGGAACAATTGGAATAGTGATATCCTCAAGGTGTAAA	KCTD1	NM_198991	ref|Homo sapiens potassium channel tetramerisation domain containing 1 (KCTD1), transcript variant 2, mRNA [NM_198991]
A_23_P130352	na	na	na	na	0.0158275	up	1.4	KCTD1	0.0226	up	1.52	KCTD1	4	ref|NM_198991|ref|NM_001142730|ref|NM_001136205|ens|ENST00000417602	TTGATGGTACAGAGCCCATTGTTTTGGACAGTCTCAAACAGCACTATTTCATTGACAGAG	KCTD1	NM_198991	ref|Homo sapiens potassium channel tetramerisation domain containing 1 (KCTD1), transcript variant 2, mRNA [NM_198991]
A_23_P130376	0.00222	down	-1.44	FAM38B	0.0010469	down	-2.57	FAM38B	0.0351	down	-1.24	FAM38B	0	ref|NM_022068|gb|AK302764|ens|ENST00000285141|gb|AK027056	TCTCGCATTCTGATTGATCATGTGAAGGAATCATTTATGGGCCCCGTCCCTAAGAGAAAC	FAM38B	NM_022068	ref|Homo sapiens family with sequence similarity 38, member B (FAM38B), mRNA [NM_022068]
A_23_P130418	na	na	na	na	0.02572	up	1.09	NDUFV2	na	na	na	na	8	ref|NM_021074|ens|ENST00000400033|ens|ENST00000318388|ens|ENST00000340013	AAAGTATCACATTCAGGTCTGCACTACTACACCCTGCATGCTTCGAAACTCTGACAGCAT	NDUFV2	NM_021074	ref|Homo sapiens NADH dehydrogenase (ubiquinone) flavoprotein 2, 24kDa (NDUFV2), nuclear gene encoding mitochondrial protein, mRNA [NM_021074]
A_23_P130466	0.0498	up	1.28	ZNF8	0.0338025	down	-1.2	ZNF8	na	na	na	na	4	ref|NM_021089|ens|ENST00000196548|gb|M29581|gb|BC039323	ACCCGAGGTTGGTTGGTCCCAAATCTATCAAACTCAGTGCCCTCTTTAGCGACATATTTT	ZNF8	NM_021089	ref|Homo sapiens zinc finger protein 8 (ZNF8), mRNA [NM_021089]
A_23_P130488	na	na	na	na	na	na	na	na	0.0219	up	1.41	ERCC2	8	ref|NM_000400|gb|X52221|gb|BC110522|gb|AX747782	CAGAGGAACAAGCTGCTCTTTATTGAGACCCAGGATGGTGCCGAAACCAGTGTCGCCCTG	ERCC2	NM_000400	ref|Homo sapiens excision repair cross-complementing rodent repair deficiency, complementation group 2 (ERCC2), transcript variant 1, mRNA [NM_000400]
A_23_P130553	na	na	na	na	na	na	na	na	0.00333	up	2.33	SHKBP1	8	ref|NM_138392|gb|AK300808|gb|CR598538|gb|CR599049	GAGAAGCACCTCATCTCAGTCTGTGCCGACAACAACCACGTGCGGACATGGTCTGTGACT	SHKBP1	NM_138392	ref|Homo sapiens SH3KBP1 binding protein 1 (SHKBP1), mRNA [NM_138392]
A_23_P130689	0.0408	up	1.24	ELOF1	0.0488958	up	1.35	ELOF1	na	na	na	na	4	ref|NM_032377|gb|AK001171|ens|ENST00000252445|gb|EU832623	GTATCTGTCAGAACCCGTGGATGTGTACAGTGATTGGATAGACGCCTGCGAGGCGGCCAA	ELOF1	NM_032377	ref|Homo sapiens elongation factor 1 homolog (S. cerevisiae) (ELOF1), mRNA [NM_032377]
A_23_P130731	na	na	na	na	na	na	na	na	0.0418	up	1.9	TBC1D17	8	ref|NM_024682|ref|NM_001168222|gb|CR616225|gb|AX746531	TTCGACCTCGGCTACGTCCAGGGCATGAGTGATCTTCTCTCCCCGATCCTCTACGTCATT	TBC1D17	NM_024682	ref|Homo sapiens TBC1 domain family, member 17 (TBC1D17), transcript variant 1, mRNA [NM_024682]
A_23_P130753	0.00412	down	-3.26	DBP	na	na	na	na	0.00529	up	2.18	DBP	4	ref|NM_001352|gb|AK310025|ens|ENST00000222122|gb|BT006836	CACGAGACCTTTGACCCTCGAAGACATCGCTTCTCAGAAGAGGAACTTAAGCCCCAGCCA	DBP	NM_001352	ref|Homo sapiens D site of albumin promoter (albumin D-box) binding protein (DBP), mRNA [NM_001352]
A_23_P130787	na	na	na	na	0.0387325	down	-1.51	QPCTL	na	na	na	na	8	ref|NM_017659|ref|NM_001163377|ens|ENST00000012049|gb|CR602598	TTGTCTCCTAATTGTGCTACAATTGGAAGACCTTCTTTCTTTTGATTGTCTCAAGCTGCC	QPCTL	NM_017659	ref|Homo sapiens glutaminyl-peptide cyclotransferase-like (QPCTL), transcript variant 1, mRNA [NM_017659]
A_23_P130919	na	na	na	na	0.0110759	up	3.21	MOBKL2A	na	na	na	na	8	ref|NM_130807|ens|ENST00000357066|gb|AK095471|gb|AL832474	CTCAAAGAACTCCATGAAATCAGGAACTGCTTGATGAAATGTATCTCCTTGTACCTGGAA	MOBKL2A	NM_130807	ref|Homo sapiens MOB1, Mps One Binder kinase activator-like 2A (yeast) (MOBKL2A), mRNA [NM_130807]
A_23_P130974	na	na	na	na	0.0492209	up	2.03	KIAA1683	na	na	na	na	8	ref|NM_025249|ref|NM_001145304|ref|NM_001145305|gb|AB051470	GCTCCCTGCAGTGGGGACTTCGTGGGAGGCACTCATGGCTCTCTGGGTCTAATGAATAAA	KIAA1683	NM_025249	ref|Homo sapiens KIAA1683 (KIAA1683), transcript variant 2, mRNA [NM_025249]
A_23_P131020	na	na	na	na	na	na	na	na	0.0412	down	-1.49	GATAD2A	8	ref|NM_017660|gb|AK125974|ens|ENST00000418032|ens|ENST00000404158	AAAGGATCAGGTCTGCTTTTAGTTTCATTTTTGTTTCTTTCCCGTCCCACTCTTTAAAAA	GATAD2A	NM_017660	ref|Homo sapiens GATA zinc finger domain containing 2A (GATAD2A), mRNA [NM_017660]
A_23_P131149	0.0434	up	1.16	ORC4L	0.022749	up	1.44	ORC4L	na	na	na	na	4	ref|NM_002552|ref|NM_181742|ref|NM_181741|gb|AK295721	AATTAATAAAGCCCATGGAAAGAACTTCAGGAAATTCACAGAGAGAGTACCAGCTGATGA	ORC4L	NM_002552	ref|Homo sapiens origin recognition complex, subunit 4-like (yeast) (ORC4L), transcript variant 2, mRNA [NM_002552]
A_23_P131208	0.025	down	-3.09	NR4A2	0.0317408	down	-5.8	NR4A2	na	na	na	na	4	ref|NM_006186|ens|ENST00000417972|ens|ENST00000417764|ens|ENST00000409572	AAGTTTTCTGCTGTAAAGAAAGCTGTAATATATAGTAAAACTAAATGTTGCGTGGGTGGC	NR4A2	NM_006186	ref|Homo sapiens nuclear receptor subfamily 4, group A, member 2 (NR4A2), mRNA [NM_006186]
A_23_P131227	0.0426	up	1.21	TTC27	0.0126112	up	1.4	TTC27	na	na	na	na	4	ref|NM_017735|gb|CR593170|gb|AK299196|ens|ENST00000317907	AGCTGTACAAATGCTTTCTTCTGTTCGACTCAATTTACGGGGCTTGTTATCTAAAGCAAA	TTC27	NM_017735	ref|Homo sapiens tetratricopeptide repeat domain 27 (TTC27), mRNA [NM_017735]
A_23_P131299	na	na	na	na	na	na	na	na	0.0175	up	1.92	ZFAND2B	8	ref|NM_138802|gb|AK292622|gb|AK293714|ens|ENST00000409412	GAACGCTGTAGCCGAAACTTCTGCATCAAGCACCGGCATCCACTGGACCATGATTGCTCT	ZFAND2B	NM_138802	ref|Homo sapiens zinc finger, AN1-type domain 2B (ZFAND2B), mRNA [NM_138802]
A_23_P131365	0.0375	down	-1.19	NDUFS1	na	na	na	na	0.012	up	1.24	NDUFS1	4	ref|NM_005006|gb|AK298320|gb|AK295987|gb|AK295705	AGTAGAGGAACCATCCATATGCTGAAGCTTCTACTAGGATCCCAGTTTTGCCGCAGATAA	NDUFS1	NM_005006	ref|Homo sapiens NADH dehydrogenase (ubiquinone) Fe-S protein 1, 75kDa (NADH-coenzyme Q reductase) (NDUFS1), nuclear gene encoding mitochondrial protein, mRNA [NM_005006]
A_23_P131375	0.0193	down	-1.56	PQLC3	0.0484871	down	-1.45	PQLC3	0.00229	up	1.93	PQLC3	0	ref|NM_152391|ens|ENST00000441908|ens|ENST00000295083|gb|CR624863	GGGCCACAACTATAGAATTACCACTGTTGGAATTTGGTACAAAATATGTTTTGTCTATTG	PQLC3	NM_152391	ref|Homo sapiens PQ loop repeat containing 3 (PQLC3), mRNA [NM_152391]
A_23_P131383	na	na	na	na	na	na	na	na	0.0419	up	1.29	FANCL	8	ref|NM_018062|ref|NM_001114636|gb|AK225147|ens|ENST00000402135	TCATTCAAAGGTTCTTGAGACTCTTGATATTTCTGTCTTCTCCTTGTGCTTTCCTATGGA	FANCL	NM_018062	ref|Homo sapiens Fanconi anemia, complementation group L (FANCL), transcript variant 2, mRNA [NM_018062]
A_23_P131449	na	na	na	na	na	na	na	na	0.0166	up	1.81	C2orf81	8	ref|NM_001145054|ens|ENST00000290390|ens|ENST00000427023|thc|THC2649713	GGTGTTGCTCAGCTCTGGTGTGCCTGAACAAGAGGACAAAGAAGGTAGCACCTTTCCTCC	C2orf81	NM_001145054	ref|Homo sapiens chromosome 2 open reading frame 81 (C2orf81), mRNA [NM_001145054]
A_23_P131526	na	na	na	na	0.0114647	up	1.72	C2orf47	na	na	na	na	8	ref|NM_024520|ens|ENST00000295079|ens|ENST00000392290|gb|CR622948	TTCTTAGTGCAAGCTATGAGTTTCAGAGGGAGTTCACACAAGGAGTAAAGCCTGACTGGA	C2orf47	NM_024520	ref|Homo sapiens chromosome 2 open reading frame 47 (C2orf47), mRNA [NM_024520]
A_23_P131596	na	na	na	na	0.000888477	down	-2.82	C2orf7	0.043	up	1.34	C2orf7	4	ref|NM_032319|ens|ENST00000258083|gb|CR593988|gb|CR610884	CAAGGGTGTCTCATGCTACAAGAAGAGGCAAGAGACAGGCCCCAGGGCTTCTGGCTAGAA	C2orf7	NM_032319	ref|Homo sapiens chromosome 2 open reading frame 7 (C2orf7), mRNA [NM_032319]
A_23_P131653	0.0212	down	-1.2	PIGF	0.0322082	down	-1.49	PIGF	na	na	na	na	4	ref|NM_002643|ref|NM_173074|ens|ENST00000412717|ens|ENST00000306465	CTCCAGATCACTACAATTTCTAGCTTTGTAGGAGCATGGCTTGGAGCACTTCCTATTCCA	PIGF	NM_002643	ref|Homo sapiens phosphatidylinositol glycan anchor biosynthesis, class F (PIGF), transcript variant 1, mRNA [NM_002643]
A_23_P131737	0.0116	down	-1.34	VPS54	na	na	na	na	na	na	na	na	8	ref|NM_016516|ref|NM_001005739|gb|CR749701|gb|AK124436	AGGGAAAAAGGAAAGTATCAAGTGTTGGGAAACTGGATTCAGTGGGATCTACAAGGAATG	VPS54	NM_016516	ref|Homo sapiens vacuolar protein sorting 54 homolog (S. cerevisiae) (VPS54), transcript variant 1, mRNA [NM_016516]
A_23_P131816	na	na	na	na	0.0214902	up	1.36	DNTTIP1	na	na	na	na	8	ref|NM_052951|ens|ENST00000439990|ens|ENST00000372605|ens|ENST00000372614	ATCTGAAGCTAGAGGAATTGAAATCCTTTGTCCTACCCTCCTGGATGGTGGAGAAGATGA	DNTTIP1	NM_052951	ref|Homo sapiens deoxynucleotidyltransferase, terminal, interacting protein 1 (DNTTIP1), mRNA [NM_052951]
A_23_P13183	na	na	na	na	0.00180017	up	1.29	EXT2	0.0104	up	1.39	EXT2	4	ref|NM_000401|ref|NM_207122|gb|U72263|gb|BX648142	TCAGGGAACCAAACCCAGAATTCGGTGCAAAAGCCAAACATCTTGGTGGGATTTGATAAA	EXT2	NM_000401	ref|Homo sapiens exostoses (multiple) 2 (EXT2), transcript variant 1, mRNA [NM_000401]
A_23_P131846	na	na	na	na	0.000242697	up	1.7	SNAI1	0.000147	up	2.1	SNAI1	4	ref|NM_005985|ens|ENST00000244050|gb|CR596163|gb|CR622459	AACAATGTCTGAAAAGGGACTGTGAGTAATGGCTGTCACTTGTCGGGGGCCCAAGTGGGG	SNAI1	NM_005985	ref|Homo sapiens snail homolog 1 (Drosophila) (SNAI1), mRNA [NM_005985]
A_23_P131866	0.0108	down	-1.72	AURKA	0.00431167	down	-2.02	AURKA	0.0325	down	-1.46	AURKA	0	ref|NM_198433|ref|NM_003600|ref|NM_198434|ref|NM_198436	CTGCCATATAACCTGACAGGAACATGCTACTGAAGTTTATTTTACCATTGACTGCTGCCC	AURKA	NM_198433	ref|Homo sapiens aurora kinase A (AURKA), transcript variant 1, mRNA [NM_198433]
A_23_P131935	na	na	na	na	0.00351177	up	2.45	FERMT1	0.0103	down	-1.64	FERMT1	4	ref|NM_017671|gb|AK225216|ens|ENST00000217289|gb|AK000123	TTACCAAAGCCAGACCTTCAGTTCAACATGCTTCCTTAGCTTTTCATAGTTGTCTGACAT	FERMT1	NM_017671	ref|Homo sapiens fermitin family homolog 1 (Drosophila) (FERMT1), mRNA [NM_017671]
A_23_P132027	na	na	na	na	0.0183927	down	-1.9	SPAG4	0.000394	up	2.71	SPAG4	4	ref|NM_003116|gb|BC143783|ens|ENST00000374273|gb|AB464242	CGATTTCGCGGTCTTTGGCCTCCAGGTTTATGATGAAACTGAAGTTTCCTTGGGGAAATT	SPAG4	NM_003116	ref|Homo sapiens sperm associated antigen 4 (SPAG4), mRNA [NM_003116]
A_23_P132121	0.0495	down	-1.27	SIK1	na	na	na	na	na	na	na	na	8	ref|NM_173354|ens|ENST00000270162|gb|D15050|gb|AB047786	CCAACACAAAACTCCTTCCCCTTTTTAAAATGATTTCTGTTCTAATGCCATAGATCAAAG	SIK1	NM_173354	ref|Homo sapiens salt-inducible kinase 1 (SIK1), mRNA [NM_173354]
A_23_P132159	na	na	na	na	na	na	na	na	0.011	down	-1.49	USP18	8	ref|NM_017414|ens|ENST00000215794|gb|CR604420|gb|AF176642	CTGTCATTTTCCATTTCCGTTCCTGGATCTACGGAGTCTTCTAAGAGATTTTGCAATGAG	USP18	NM_017414	ref|Homo sapiens ubiquitin specific peptidase 18 (USP18), mRNA [NM_017414]
A_23_P132175	na	na	na	na	0.0155522	up	1.62	RTN4R	na	na	na	na	8	ref|NM_023004|gb|AK054602|ens|ENST00000425986|ens|ENST00000043402	CTCCCACCCAGATCGCGGTATATAGAGATATGCATTTTATTTTACTTGTGTAAAAATATC	RTN4R	NM_023004	ref|Homo sapiens reticulon 4 receptor (RTN4R), mRNA [NM_023004]
A_23_P132260	0.0123	up	1.5	PES1	na	na	na	na	na	na	na	na	8	ref|NM_014303|gb|CU013427|gb|CR620678|gb|CR597567	GTGCAGCTGCCCCCACACCTTTCACCCTTTGTGACCGAGAAGGAAGGAGATTACGTTCCA	PES1	NM_014303	ref|Homo sapiens pescadillo homolog 1, containing BRCT domain (zebrafish) (PES1), mRNA [NM_014303]
A_23_P132263	na	na	na	na	0.0487912	up	1.33	EIF4ENIF1	na	na	na	na	8	ref|NM_019843|ref|NM_001164501|ref|NM_001164502|gb|AK130061	TACAGCTGTACATAAAAGTAGCTGATATTAGTTAGGCCTGTGTCAACAGTTTGGATTTTT	EIF4ENIF1	NM_019843	ref|Homo sapiens eukaryotic translation initiation factor 4E nuclear import factor 1 (EIF4ENIF1), transcript variant 1, mRNA [NM_019843]
A_23_P132285	0.00692	down	-1.42	MPST	na	na	na	na	0.00206	up	1.72	MPST	4	ref|NM_001130517|ref|NM_021126|ref|NM_001013436|ref|NR_024038	ATTTGGGGTGACATCTCAAAGGCCAGGAATTCCGTTGACTTGTTGGCTGCCAGTAGGGGC	MPST	NM_001130517	ref|Homo sapiens mercaptopyruvate sulfurtransferase (MPST), nuclear gene encoding mitochondrial protein, transcript variant 3, mRNA [NM_001130517]
A_23_P132294	na	na	na	na	na	na	na	na	0.0268	up	1.51	GGA1	8	ref|NM_001001560|ref|NM_001172688|ref|NM_013365|ref|NM_001172687	TCTGTCCATCCATCTGTCCGTGGTCAGAAGTGGGGTCAGTGTGTGAGTGAGAGCAGGAGT	GGA1	NM_001001560	ref|Homo sapiens golgi-associated, gamma adaptin ear containing, ARF binding protein 1 (GGA1), transcript variant 2, mRNA [NM_001001560]
A_23_P132341	na	na	na	na	na	na	na	na	0.0344	up	1.71	C22orf46	8	ref|NM_001142964|ens|ENST00000356843|ens|ENST00000402966|gb|AK131457	AGAGCCTCCCAGTGAGAACAGTAGGGGCAGGAAAATGATCAGGTCAAGGGTCTCCCAGCT	C22orf46	NM_001142964	ref|Homo sapiens chromosome 22 open reading frame 46 (C22orf46), mRNA [NM_001142964]
A_23_P132378	0.0246	down	-1.79	CELSR1	0.0178559	up	1.24	CELSR1	0.00876	up	1.99	CELSR1	0	ref|NM_014246|ens|ENST00000262738|gb|BC013631|gb|AL831846	CCTCACACCTGAATGAATTATACATGTGCCTTACCAGGTGAGTGGTCTTTCGAAGATAAA	CELSR1	NM_014246	ref|Homo sapiens cadherin, EGF LAG seven-pass G-type receptor 1 (flamingo homolog, Drosophila) (CELSR1), mRNA [NM_014246]
A_23_P132388	0.00876	up	1.46	SCO2	na	na	na	na	na	na	na	na	8	ref|NM_005138|ref|NM_001169109|ref|NM_001169111|ref|NM_001169110	AGTCACAGTTACCGCGTGTACTACAATGCCGGCCCCAAGGATGAGGACCAGGACTACATC	SCO2	NM_005138	ref|Homo sapiens SCO cytochrome oxidase deficient homolog 2 (yeast) (SCO2), nuclear gene encoding mitochondrial protein, transcript variant 1, mRNA [NM_005138]
A_23_P132417	na	na	na	na	na	na	na	na	0.000761	down	-1.34	LSG1	8	ref|NM_018385|gb|BC082971|ens|ENST00000265245|gb|BC068500	CGATGGTCACACAACTCTGAATATGCTTAAGACCATTGAATTACACACTTTACGTTGGTG	LSG1	NM_018385	ref|Homo sapiens large subunit GTPase 1 homolog (S. cerevisiae) (LSG1), mRNA [NM_018385]
A_23_P132438	na	na	na	na	0.0481966	up	1.63	MSL2	na	na	na	na	8	ref|NM_018133|ref|NM_001145417|ens|ENST00000309993|gb|AK001408	GAAAAATACTGCTGGAAAATTTCCAATTTCTACTACGTTCACCATCTCTAGTAAGATCTG	MSL2	NM_018133	ref|Homo sapiens male-specific lethal 2 homolog (Drosophila) (MSL2), transcript variant 1, mRNA [NM_018133]
A_23_P132444	0.0248	down	-1.27	TCEA1	0.00590942	up	2.55	TCEA1	na	na	na	na	4	ref|NM_006756|ref|NM_201437|gb|BX538034|ens|ENST00000399633	CGTAGAAAGACCTCAGTACATGCTTTGCACTCTCCTTTGCTCCCTTTTTCCAATTTCTTA	TCEA1	NM_006756	ref|Homo sapiens transcription elongation factor A (SII), 1 (TCEA1), transcript variant 1, mRNA [NM_006756]
A_23_P132526	na	na	na	na	0.0212181	down	-1.58	PIK3R4	na	na	na	na	8	ref|NM_014602|ens|ENST00000356763|gb|AK314219|gb|AB384687	AAGTTGTCCAGGAAATTCAGAATAAGCAGAAAGTAGGACCAAGTGATGACACCCCTCGAA	PIK3R4	NM_014602	ref|Homo sapiens phosphoinositide-3-kinase, regulatory subunit 4 (PIK3R4), mRNA [NM_014602]
A_23_P132536	na	na	na	na	0.0353638	up	1.2	TRAK1	na	na	na	na	8	ref|NM_001042646|ens|ENST00000327628|ens|ENST00000396175|gb|CR594881	TTGGTTAATTATGTTCTCAGCTCTCCCTGCTGTTGTATGTGTGCATTCACTGCAAGTAAC	TRAK1	NM_001042646	ref|Homo sapiens trafficking protein, kinesin binding 1 (TRAK1), transcript variant 1, mRNA [NM_001042646]
A_23_P132595	0.0167	down	-1.73	VGLL4	0.0286571	down	-1.51	VGLL4	na	na	na	na	4	ref|NM_014667|ref|NM_001128219|ref|NM_001128221|ref|NM_001128220	TCTGCATTCATAGCCACGAGTTTGTTATTGCTACAGGCTACTGAGCGTCGTAACAGGAAA	VGLL4	NM_014667	ref|Homo sapiens vestigial like 4 (Drosophila) (VGLL4), transcript variant 2, mRNA [NM_014667]
A_23_P132644	0.00155	up	1.74	NCEH1	na	na	na	na	0.0323	down	-1.27	NCEH1	4	ref|NM_020792|ref|NM_001146276|ref|NM_001146277|ref|NM_001146278	TTGGTGGATCTATTTTATGCATGACCTTTTAACCTTTGACTTTGCTTATTTCCCACTACG	NCEH1	NM_020792	ref|Homo sapiens neutral cholesterol ester hydrolase 1 (NCEH1), transcript variant 2, mRNA [NM_020792]
A_23_P132669	0.0491	down	-1.26	GLT8D1	0.0156111	down	-1.64	GLT8D1	na	na	na	na	4	ref|NM_001010983|ref|NM_018446|ref|NM_152932|gb|CR614748	TAAGCAAGCATTTCTCAGGAAGTCCTGGAAGATAGCATGCGTGGGAAGTAACAGTTGCTA	GLT8D1	NM_001010983	ref|Homo sapiens glycosyltransferase 8 domain containing 1 (GLT8D1), transcript variant 3, mRNA [NM_001010983]
A_23_P132675	na	na	na	na	na	na	na	na	0.0365	up	1.9	UQCRC1	8	ref|NM_003365|gb|CR613607|gb|CR620730|gb|CR618343	TGAATGGGAAAGCCGGATTGCGGAGGTGGATGCCAGTGTGGTACGTGAGATCTGCTCCAA	UQCRC1	NM_003365	ref|Homo sapiens ubiquinol-cytochrome c reductase core protein I (UQCRC1), mRNA [NM_003365]
A_23_P132718	na	na	na	na	0.0205943	down	-1.61	SEMA3B	0.0232	up	1.39	SEMA3B	4	ref|NM_004636|ref|NM_001005914|gb|AB209322|gb|U28369	TTGGGTAGTGAGCAGTGAGCAGAAAGCTGTGAACAGGCTGGGCTGCTGGAGGTGGGGCGA	SEMA3B	NM_004636	ref|Homo sapiens sema domain, immunoglobulin domain (Ig), short basic domain, secreted, (semaphorin) 3B (SEMA3B), transcript variant 1, mRNA [NM_004636]
A_23_P132763	na	na	na	na	0.0486179	down	-3.68	VGLL3	na	na	na	na	8	ref|NM_016206|ens|ENST00000398399|gb|AK095826|gb|BC017383	CAGGACTAATCAAGGATCAATGGGTGACATGATATCATGCTATGTGCCATTTTGTGTTAA	VGLL3	NM_016206	ref|Homo sapiens vestigial like 3 (Drosophila) (VGLL3), mRNA [NM_016206]
A_23_P132784	0.0262	down	-1.3	FXR1	0.00329671	down	-1.66	FXR1	na	na	na	na	4	ref|NM_001013439|ref|NM_005087|ref|NM_001013438|gb|AK294603	AGTCTTTACATCGCACTTTCAGTTCCTCCATTTGGAATTCATAAAGGGGAGGGATCCTGA	FXR1	NM_001013439	ref|Homo sapiens fragile X mental retardation, autosomal homolog 1 (FXR1), transcript variant 3, mRNA [NM_001013439]
A_23_P132874	na	na	na	na	0.00559978	up	1.84	C3orf26	na	na	na	na	8	ref|NM_032359|ref|NM_001167924|ens|ENST00000489081|ens|ENST00000497345	TGTGTCAACAGATGGATCACTGGAATGTGGGGATTCTGAAACAGAAATGAAACTGTCCTT	C3orf26	NM_032359	ref|Homo sapiens chromosome 3 open reading frame 26 (C3orf26), transcript variant 1, mRNA [NM_032359]
A_23_P132889	na	na	na	na	na	na	na	na	0.0106	up	1.83	CRMP1	8	ref|NM_001014809|ref|NM_001313|gb|BC009987|gb|AK127754	GTACTAGTGTGGTGTGTTTGCTTGGAAATTCCTTGCCCCACAGTTGTGTTCATGCTGAAT	CRMP1	NM_001014809	ref|Homo sapiens collapsin response mediator protein 1 (CRMP1), transcript variant 1, mRNA [NM_001014809]
A_23_P132936	na	na	na	na	0.0101204	down	-1.62	SPCS3	na	na	na	na	8	ref|NM_021928|ens|ENST00000264597|gb|EU831652|gb|EU831735	GAATGTCACTTTGACCCTGTCTTGGAACGTCGTACCAAATGCTGGAATTCTACCTCTTGT	SPCS3	NM_021928	ref|Homo sapiens signal peptidase complex subunit 3 homolog (S. cerevisiae) (SPCS3), mRNA [NM_021928]
A_23_P133095	0.00494	up	1.61	RAPGEF2	na	na	na	na	0.00298	down	-1.85	RAPGEF2	4	ref|NM_014247|ens|ENST00000264431|gb|AB002311|gb|CR621095	CTGCTAATCTCAGTTCGCTCTGTGATGTCAAGTGCAGAATGTACAATTAACTGGTGATTT	RAPGEF2	NM_014247	ref|Homo sapiens Rap guanine nucleotide exchange factor (GEF) 2 (RAPGEF2), mRNA [NM_014247]
A_23_P133123	na	na	na	na	0.0390837	up	1.48	MND1	na	na	na	na	8	ref|NM_032117|ens|ENST00000240488|gb|AY028916|gb|BC032142	AGAAGACTTTGACTACATAGACTAAAATATTCCATGGTGGTGAAGGATGTACAAGCTTGT	MND1	NM_032117	ref|Homo sapiens meiotic nuclear divisions 1 homolog (S. cerevisiae) (MND1), mRNA [NM_032117]
A_23_P133133	na	na	na	na	na	na	na	na	0.0345	up	2.86	ALPK1	8	ref|NM_025144|ref|NM_001102406|gb|AK097246|gb|AK131090	ATGTGAGCCTTTGTGATACGAATTCAATTTGTTTTCCTGTCTTTTGACATTTGACTTTGC	ALPK1	NM_025144	ref|Homo sapiens alpha-kinase 1 (ALPK1), transcript variant 1, mRNA [NM_025144]
A_23_P133227	na	na	na	na	na	na	na	na	0.0302	down	-1.24	HARS	8	ref|NM_002109|gb|CR609422|gb|AK302295|gb|AK124831	GAGGTTAAGACAAACTGCATATGTACTTCAATTGCTTTGCACTTTTCCGTTTCAGCGGAA	HARS	NM_002109	ref|Homo sapiens histidyl-tRNA synthetase (HARS), mRNA [NM_002109]
A_23_P133245	0.0137	down	-1.61	IK	0.028618	down	-1.22	IK	na	na	na	na	4	ref|NM_006083|ens|ENST00000261812|ens|ENST00000417647|gb|A25270	ATTCCAGTATGGTATCAAAATGTCTGAAGGGCGGAAAACCAGGCGCTTCAAGGAAACCAA	IK	NM_006083	ref|Homo sapiens IK cytokine, down-regulator of HLA II (IK), mRNA [NM_006083]
A_23_P133279	na	na	na	na	0.0219933	up	2.02	FAM173B	na	na	na	na	8	ref|NM_199133|gb|AK055604|ens|ENST00000280330|gb|AK123462	CTTGAGAGCTGCCACTCATTTAATATTTCTCATTTATGAGAAGAGACTTGACTGATTTAG	FAM173B	NM_199133	ref|Homo sapiens family with sequence similarity 173, member B (FAM173B), mRNA [NM_199133]
A_23_P133284	0.00769	up	1.65	RIOK2	0.00430753	up	2.44	RIOK2	na	na	na	na	4	ref|NM_018343|ens|ENST00000283109|gb|AK002021|gb|AK001697	AATCAAGTTTGGAAGCAGCTAGCTTTTGGGGAGAATAATATATTTAGGATCTTGGATATG	RIOK2	NM_018343	ref|Homo sapiens RIO kinase 2 (yeast) (RIOK2), transcript variant 1, mRNA [NM_018343]
A_23_P133345	na	na	na	na	na	na	na	na	0.0202	down	-1.23	CLINT1	8	ref|NM_014666|gb|AX747715|gb|AL833548|gb|BC030264	TGAAGAGTCCATTTAACAGCATAATTTGTGGGAAGACTGGAATAGGGCTGAATAAATGTG	CLINT1	NM_014666	ref|Homo sapiens clathrin interactor 1 (CLINT1), mRNA [NM_014666]
A_23_P133424	0.0333	down	-1.31	SKP1	na	na	na	na	na	na	na	na	8	ref|NM_006930|ref|NM_170679|gb|CR597720|ens|ENST00000353411	TTTTTTCTTTGCTCTGAATAAAACTGAACTGTGGGTTCTCTATAAGTGGCATTTTGGGCT	SKP1	NM_006930	ref|Homo sapiens S-phase kinase-associated protein 1 (SKP1), transcript variant 1, mRNA [NM_006930]
A_23_P133438	0.00335	down	-2.22	FAM105A	0.0018352	down	-2.37	FAM105A	na	na	na	na	4	ref|NM_019018|ens|ENST00000274217|gb|CR591591|gb|AK001989	TCAGCATGGAAGGAATTAGGACCTTTTCTTCAGGATTACAGGTACACTGGATGCAGCCAT	FAM105A	NM_019018	ref|Homo sapiens family with sequence similarity 105, member A (FAM105A), mRNA [NM_019018]
A_23_P13344	na	na	na	na	na	na	na	na	0.0385	up	1.34	EEF1G	8	ref|NM_001404|gb|AK300203|ens|ENST00000448615|ens|ENST00000378019	GCCAGGAGCTTGCCTTTCCGCTGAGTCCAGATTGGCAGGTGGACTACGAGTCATACACAT	EEF1G	NM_001404	ref|Homo sapiens eukaryotic translation elongation factor 1 gamma (EEF1G), mRNA [NM_001404]
A_23_P133585	0.00106	up	1.45	CDK7	na	na	na	na	0.0138	up	1.27	CDK7	4	ref|NM_001799|gb|CR600515|gb|L20320|ens|ENST00000256443	TCAGCTGCCAAGACCAAACTGTCCAGTGGAAACCTTAAAGGAGCAATCAAATCCAGCTTT	CDK7	NM_001799	ref|Homo sapiens cyclin-dependent kinase 7 (CDK7), mRNA [NM_001799]
A_23_P133596	0.00958	down	-1.29	RNASEN	na	na	na	na	na	na	na	na	8	ref|NM_013235|ref|NM_001100412|gb|BC054003|ens|ENST00000344624	GCATGCAAGTGTGGAGTATTTACTTGCTCAGTAACTGTGACTGTTGTCTATTGAGACCTA	RNASEN	NM_013235	ref|Homo sapiens ribonuclease type III, nuclear (RNASEN), transcript variant 1, mRNA [NM_013235]
A_23_P13364	0.0136	down	-1.34	NUCB2	0.00847473	down	-1.6	NUCB2	0.00576	up	1.42	NUCB2	0	ref|NM_005013|gb|AB231311|gb|AK291507|gb|AK128739	GATGAGCTTCAGAAACAAAAAGAAGAGCTACAACGTCAGCATGATCAACTGGAGGCTCAG	NUCB2	NM_005013	ref|Homo sapiens nucleobindin 2 (NUCB2), mRNA [NM_005013]
A_23_P133691	na	na	na	na	na	na	na	na	0.041	up	2.73	RRAGD	8	ref|NM_021244|gb|AL137502|ens|ENST00000359203|ens|ENST00000369415	CTGCTGTGATATGATAGATGTGGTTATTGACATCTCTTGTATTTATGGTCTCAAAGAAGA	RRAGD	NM_021244	ref|Homo sapiens Ras-related GTP binding D (RRAGD), mRNA [NM_021244]
A_23_P133694	na	na	na	na	0.00548941	up	2.43	SLC29A1	0.0321	down	-1.58	SLC29A1	4	ref|NM_001078177|ref|NM_001078174|ref|NM_004955|ref|NM_001078175	ACCCTGTACAGTTGCCACGTTACTGCCTTTTTTAAAAATATATTTGACAGAAACCAGGTG	SLC29A1	NM_001078177	ref|Homo sapiens solute carrier family 29 (nucleoside transporters), member 1 (SLC29A1), nuclear gene encoding mitochondrial protein, transcript variant 1, mRNA [NM_001078177]
A_23_P133755	na	na	na	na	0.00627572	up	1.32	PREP	0.00913	down	-1.38	PREP	4	ref|NM_002726|ens|ENST00000369110|gb|X74496|gb|BC030636	AACTGCCGTGGGAATTTTATCTTTTTTAGGCTTCTCCTTTTTAGCAAGGCCTTGGTGTTT	PREP	NM_002726	ref|Homo sapiens prolyl endopeptidase (PREP), mRNA [NM_002726]
A_23_P133770	0.00124	down	-1.42	C6orf129	0.00193852	down	-1.87	C6orf129	na	na	na	na	4	ref|NM_138493|ens|ENST00000373408|gb|BC104835|gb|BC108655	AATGAACAAAGCCTCCAACTACGAGAAGGAACTGAAGTTTCTTCGGCAAGAGAACCGGAA	C6orf129	NM_138493	ref|Homo sapiens chromosome 6 open reading frame 129 (C6orf129), mRNA [NM_138493]
A_23_P133814	0.0421	up	1.24	HIST1H3C	0.00316847	up	1.96	HIST1H3C	na	na	na	na	4	ref|NM_003531|ens|ENST00000360577|gb|BC160079|gb|BC127610	TCTGTGCGCTATTCACGCTAAACGCGTCACCATCATGCCCAAAGATATCCAGCTGGCACG	HIST1H3C	NM_003531	ref|Homo sapiens histone cluster 1, H3c (HIST1H3C), mRNA [NM_003531]
A_23_P133902	0.0248	down	-1.51	PSORS1C1	na	na	na	na	0.0234	up	2.35	PSORS1C1	4	ref|NM_014068|gb|AF484419|ens|ENST00000433334|ens|ENST00000441092	AATGTTTCCCTCAAGGACCTTTCTGCCTGGAAGTCTGTTAGCCTTTCAGAAGTAACATGT	PSORS1C1	NM_014068	ref|Homo sapiens psoriasis susceptibility 1 candidate 1 (PSORS1C1), mRNA [NM_014068]
A_23_P133923	na	na	na	na	0.0295187	down	-1.93	BAT4	0.0158	up	1.55	BAT4	4	ref|NM_033177|gb|AK123707|ens|ENST00000375896|ens|ENST00000400129	CTGAAGTTTTTGGTCAATAGGCTCTGTCTTCGTGAGAGACGGGCTGAGAGTCAGAAATAA	BAT4	NM_033177	ref|Homo sapiens HLA-B associated transcript 4 (BAT4), mRNA [NM_033177]
A_23_P133956	0.0187	down	-1.92	KIFC1	0.000934295	down	-2.41	KIFC1	na	na	na	na	4	ref|NM_002263|gb|AK303239|ens|ENST00000431783|ens|ENST00000374523	TGGTAGTGCTAAGATGCTCATGTTTGTGAACATTTCTCCACTGGAAGAGAACGTCTCCGA	KIFC1	NM_002263	ref|Homo sapiens kinesin family member C1 (KIFC1), mRNA [NM_002263]
A_23_P134058	0.0369	up	2.54	C6orf114	na	na	na	na	na	na	na	na	8	ref|NM_033069|gb|BC009205|ens|ENST00000379278|gb|AF264036	ATTTTGGCAAGTGTACATGGCTAAGAACAAGTGGAATCAGAATTCAACTTAAGTTTGCTT	C6orf114	NM_033069	ref|Homo sapiens chromosome 6 open reading frame 114 (C6orf114), mRNA [NM_033069]
A_23_P134078	0.0455	up	1.34	CDYL	na	na	na	na	na	na	na	na	8	ref|NM_004824|ref|NM_001143970|ref|NM_001143971|ref|NR_026590	AGGTACAGATACCTCAGATTCGGGAAACTCAAAATCAAAAGACTTAGCTTCTAGGATAAA	CDYL	NM_004824	ref|Homo sapiens chromodomain protein, Y-like (CDYL), transcript variant 1, mRNA [NM_004824]
A_23_P134085	na	na	na	na	na	na	na	na	0.00284	down	-2.49	CNKSR3	8	ref|NM_173515|ens|ENST00000367213|ens|ENST00000367209|gb|AK055911	ATATCTTGGAAAGCCTCATGGTCACTAATTTTCAACTAGCATCAGGTATTTTGAAAACGT	CNKSR3	NM_173515	ref|Homo sapiens CNKSR family member 3 (CNKSR3), mRNA [NM_173515]
A_23_P134109	na	na	na	na	0.0204513	up	1.37	EPB41L2	na	na	na	na	8	ref|NM_001431|ref|NM_001135554|ref|NM_001135555|gb|AY512660	CTTAATGCCACACCACTATTCCAGCGAATTTATGCTACAACTGGTAACAATGACCAGAAG	EPB41L2	NM_001431	ref|Homo sapiens erythrocyte membrane protein band 4.1-like 2 (EPB41L2), transcript variant 1, mRNA [NM_001431]
A_23_P134113	0.0349	down	-1.38	C6orf192	na	na	na	na	0.00321	up	1.41	C6orf192	4	ref|NM_052831|gb|AJ420537|ens|ENST00000275227|ens|ENST00000367919	TTCCCCTAATGCGAATGCTTGTTTTGTTAGGGAAGGGCTTCCTCCAACTTCGTGTGAAAT	C6orf192	NM_052831	ref|Homo sapiens chromosome 6 open reading frame 192 (C6orf192), mRNA [NM_052831]
A_23_P134125	na	na	na	na	na	na	na	na	0.021	up	1.85	MAP3K5	8	ref|NM_005923|ens|ENST00000355845|ens|ENST00000359015|gb|U67156	AGTGTGCAGAATCTGAGAGCAATGGTTTTTACTTCTCTGTGTTAATTGTAATATTGACTC	MAP3K5	NM_005923	ref|Homo sapiens mitogen-activated protein kinase kinase kinase 5 (MAP3K5), mRNA [NM_005923]
A_23_P134147	0.0148	up	1.5	ZBTB24	0.00674592	up	1.57	ZBTB24	na	na	na	na	4	ref|NM_014797|gb|BX648883|ens|ENST00000230122|gb|AB007901	TGTGTTTCTTAGGAAATAGAATGTTATGCTTTGGGGCTCCTGAAACACCTCGTTTTGAAG	ZBTB24	NM_014797	ref|Homo sapiens zinc finger and BTB domain containing 24 (ZBTB24), transcript variant 1, mRNA [NM_014797]
A_23_P134167	na	na	na	na	na	na	na	na	0.00233	down	-1.52	PDSS2	8	ref|NM_020381|ens|ENST00000369037|ens|ENST00000453874|gb|AF254956	AGCTTAAGAGAACACTGTTCTGTTTGAAATGCTTTCTGTCACTGAAATTGGCTTAATTAG	PDSS2	NM_020381	ref|Homo sapiens prenyl (decaprenyl) diphosphate synthase, subunit 2 (PDSS2), mRNA [NM_020381]
A_23_P134176	0.0179	up	1.46	SOD2	0.0210116	down	-1.23	SOD2	0.00111	up	7.66	SOD2	0	ref|NM_001024465|ref|NM_001024466|ref|NM_000636|gb|AK296809	TTGATGTGTGGGAGCACGCTTACTACCTTCAGTATAAAAATGTCAGGCCTGATTATCTAA	SOD2	NM_001024465	ref|Homo sapiens superoxide dismutase 2, mitochondrial (SOD2), nuclear gene encoding mitochondrial protein, transcript variant 2, mRNA [NM_001024465]
A_23_P134237	na	na	na	na	na	na	na	na	0.0159	up	2.53	RARRES2	8	ref|NM_002889|gb|AK312197|ens|ENST00000467793|ens|ENST00000482669	TTTAAGCTGCAGCAGACAAGCTGCCGGAAGAGGGACTGGAAGAAACCCGAGTGCAAAGTC	RARRES2	NM_002889	ref|Homo sapiens retinoic acid receptor responder (tazarotene induced) 2 (RARRES2), mRNA [NM_002889]
A_23_P134295	na	na	na	na	na	na	na	na	0.00431	up	1.3	NUDT1	8	ref|NM_198949|ref|NM_198952|ref|NM_198954|ref|NM_198948	AATTCCACGGGTACTTCAAGTTCCAGGGTCAGGACACCATCCTGGACTACACACTCCGCG	NUDT1	NM_198949	ref|Homo sapiens nudix (nucleoside diphosphate linked moiety X)-type motif 1 (NUDT1), transcript variant 2B, mRNA [NM_198949]
A_23_P134426	0.0182	down	-1.47	GPNMB	na	na	na	na	0.00407	up	2.47	GPNMB	4	ref|NM_001005340|ref|NM_002510|ens|ENST00000435486|ens|ENST00000453162	ACCAGGCATGATGCTGAGTGACACTCTTGTGTATATTTCCAAATTTTTGTACAGTCGCTG	GPNMB	NM_001005340	ref|Homo sapiens glycoprotein (transmembrane) nmb (GPNMB), transcript variant 1, mRNA [NM_001005340]
A_23_P134433	na	na	na	na	na	na	na	na	0.03	down	-2.12	EN2	8	ref|NM_001427|ens|ENST00000297375|thc|THC2479471	AAATTGTGAACACCCCCACCCCCGCATTTTTGTGTGTTGAAATTCTTGAAGGTTACATTA	EN2	NM_001427	ref|Homo sapiens engrailed homeobox 2 (EN2), mRNA [NM_001427]
A_23_P134454	na	na	na	na	0.0181753	down	-1.4	CAV1	0.00155	down	-6.06	CAV1	4	ref|NM_001753|ref|NM_001172895|ref|NM_001172896|ref|NM_001172897	ATTCCTCCTGCTCATATTGTGATTCTCACTTTGGGGACTTTTCTTAAACCTTCAGTTATG	CAV1	NM_001753	ref|Homo sapiens caveolin 1, caveolae protein, 22kDa (CAV1), transcript variant 1, mRNA [NM_001753]
A_23_P134650	na	na	na	na	0.0064503	up	1.72	PTCD1	0.0127	up	1.2	PTCD1	4	ref|NM_015545|ens|ENST00000422429|ens|ENST00000438524|gb|AK001615	TCCCTCATGAAGGTAGAACCAGCTGCTGTTGACACCGAGGTTACATCTGTATGTCTATTT	PTCD1	NM_015545	ref|Homo sapiens pentatricopeptide repeat domain 1 (PTCD1), mRNA [NM_015545]
A_23_P134684	0.014	down	-1.57	HMBOX1	na	na	na	na	0.0267	up	1.2	HMBOX1	4	ref|NM_024567|ref|NM_001135726|gb|CR605519|gb|DQ269478	CACAGACATCCTTTCCTCTCACAAGCTGTGTGACTTAGTAGATAAAATACTGCCTTCTGC	HMBOX1	NM_024567	ref|Homo sapiens homeobox containing 1 (HMBOX1), transcript variant 1, mRNA [NM_024567]
A_23_P134744	0.0151	down	-1.97	RNF122	na	na	na	na	0.0134	up	1.52	RNF122	4	ref|NM_024787|ens|ENST00000256257|gb|CR623897|gb|AK022588	GGGATTTTCTGTTCCTCCCTGGAGTGGGTGAGGGTGGGAGAAAGTTACATATTTAAAGAA	RNF122	NM_024787	ref|Homo sapiens ring finger protein 122 (RNF122), mRNA [NM_024787]
A_23_P134809	na	na	na	na	0.02616	up	1.45	NSMAF	na	na	na	na	8	ref|NM_003580|ref|NM_001144772|ens|ENST00000038176|ens|ENST00000427130	TACACTGTAAGGCAGATGATCGTCCCCGTATGATGATTGTCAGAAGACAGGACTAAGTAG	NSMAF	NM_003580	ref|Homo sapiens neutral sphingomyelinase (N-SMase) activation associated factor (NSMAF), transcript variant 1, mRNA [NM_003580]
A_23_P134854	na	na	na	na	na	na	na	na	0.0275	up	1.96	CLDN23	8	ref|NM_194284|gb|AK123547|gb|BC016047|gb|FV043672	GCATGCAAGAGTTTCTCTTCCAGAAGCCAAGAGGAGAACAAAGGTCCTAATGCTGTACTA	CLDN23	NM_194284	ref|Homo sapiens claudin 23 (CLDN23), mRNA [NM_194284]
A_23_P134925	0.0274	down	-1.58	BNIP3L	na	na	na	na	0.0418	up	1.58	BNIP3L	4	ref|NM_004331|ens|ENST00000221209|ens|ENST00000380629|gb|CR606234	ATTTGGGGACAAAAAGGCAGGCTTCATTTTTCATATGTTTGATGAAAACTGGCTCAAGAT	BNIP3L	NM_004331	ref|Homo sapiens BCL2/adenovirus E1B 19kDa interacting protein 3-like (BNIP3L), mRNA [NM_004331]
A_23_P134935	0.00288	up	6.69	DUSP4	0.0292	up	1.86	DUSP4	na	na	na	na	4	ref|NM_001394|ref|NM_057158|ens|ENST00000240101|ens|ENST00000404690	CGAGCTCCTTCCCCATCATTTCTCCTTGGCCAACGACGAGGCCAGCCAGAATGGCAATAA	DUSP4	NM_001394	ref|Homo sapiens dual specificity phosphatase 4 (DUSP4), transcript variant 1, mRNA [NM_001394]
A_23_P134953	0.00111	up	1.81	PLIN2	0.00163373	up	1.96	PLIN2	0.0333	up	1.27	PLIN2	0	ref|NM_001122|gb|AK296125|gb|AK297920|ens|ENST00000276914	GCTGCAGAAAATGAAGGAATCTTTAGATGACGTGATGGATTATCTTGTTAACAACACGCC	PLIN2	NM_001122	ref|Homo sapiens perilipin 2 (PLIN2), mRNA [NM_001122]
A_23_P135061	na	na	na	na	0.0271431	up	1.48	CORO2A	0.00674	up	1.45	CORO2A	4	ref|NM_003389|ref|NM_052820|gb|BX648086|ens|ENST00000343933	TGAAAGAGATTCCAGTGGGACATGGTGCCGTTTTTCTGTTTGCCTTCTTGCAACAACAGT	CORO2A	NM_003389	ref|Homo sapiens coronin, actin binding protein, 2A (CORO2A), transcript variant 1, mRNA [NM_003389]
A_23_P135104	na	na	na	na	0.0228895	up	1.89	MRPS2	na	na	na	na	8	ref|NM_016034|gb|CR616508|gb|CR623075|gb|CR603007	TTCTCAATCTAAATGCCTTTCAGGTGGGCCGCTTCCTTGGCTACCTGGTTCCAGGGGGCT	MRPS2	NM_016034	ref|Homo sapiens mitochondrial ribosomal protein S2 (MRPS2), nuclear gene encoding mitochondrial protein, mRNA [NM_016034]
A_23_P135164	0.008	down	-1.73	UAP1L1	0.00914217	up	2.52	UAP1L1	0.00295	up	2.46	UAP1L1	0	ref|NM_207309|gb|AK128529|ens|ENST00000409858|ens|ENST00000360271	GGGCCCTTCTCATAGCTGTTCCTCATGGCCATGACTGGAACAGGGATGCAACCTCTTTCT	UAP1L1	NM_207309	ref|Homo sapiens UDP-N-acteylglucosamine pyrophosphorylase 1-like 1 (UAP1L1), mRNA [NM_207309]
A_23_P135239	na	na	na	na	0.0390508	up	1.34	TLE1	0.0387	up	1.22	TLE1	4	ref|NM_005077|gb|AK304565|gb|AK293606|gb|AB209854	ATGATAAGTACATAGTCACTGGCTCGGGGGACAAGAAGGCTACAGTCTATGAAGTCATCT	TLE1	NM_005077	ref|Homo sapiens transducin-like enhancer of split 1 (E(sp1) homolog, Drosophila) (TLE1), mRNA [NM_005077]
A_23_P13524	na	na	na	na	0.01361	up	1.67	TMEM126A	na	na	na	na	8	ref|NM_032273|ens|ENST00000304511|gb|AK312081|gb|AB528253	AAGCCTGTCTTTAGAAAGATGTTATTTCCTATTTTGCTCCAGACTATGTTTTCAGCATAC	TMEM126A	NM_032273	ref|Homo sapiens transmembrane protein 126A (TMEM126A), mRNA [NM_032273]
A_23_P135248	na	na	na	na	0.0301968	down	-3.05	CCL27	na	na	na	na	8	ref|NM_006664|ens|ENST00000259631|gb|BC148263|gb|BC166648	AGTGGTTTGAGCACCAAGAGAGAAAGCTCCATGGGACTCTGCCCAAGCTGAATTTTGGGA	CCL27	NM_006664	ref|Homo sapiens chemokine (C-C motif) ligand 27 (CCL27), mRNA [NM_006664]
A_23_P135381	0.00836	down	-2.23	SP5	na	na	na	na	na	na	na	na	8	ref|NM_001003845|ens|ENST00000375281|gb|FV249886|gb|FV306180	TTTTCGCTAGGACCGGTTTGGGCTTTGTACAGGTTATTTAATAGCTTTGTTAAAGATAAT	SP5	NM_001003845	ref|Homo sapiens Sp5 transcription factor (SP5), mRNA [NM_001003845]
A_23_P135454	0.024	up	1.35	AFG3L2	na	na	na	na	na	na	na	na	8	ref|NM_006796|ens|ENST00000269143|gb|Y18314|gb|CR597170	GGATAGGATGTGTATGACTTTAGGTGGTCGAGCCTCTGAAGAAATCTTCTTTGGAAGAAT	AFG3L2	NM_006796	ref|Homo sapiens AFG3 ATPase family gene 3-like 2 (yeast) (AFG3L2), nuclear gene encoding mitochondrial protein, mRNA [NM_006796]
[truncated: 8,201 more rows]
